# Supplementary material for: Acute exercise rewires the proteomic landscape of human immune cells
Source: medRxiv preprint, doi:10.1101/2025.01.30.25321196, version 1 (2025-02-03)
Supplement: Table S5 [file 321196_file17.xlsx]

## Sheet: Time effects
Condition	Timepoint	Protein	log2FC	AveExpr	t	B	P.Value	adj.P.Val	log10.adj.pval
HIIE	Post exercise	SYTL2	1.23099	11.4129	6.42963	10.2796	2.04995e-09	1.23796e-05	4.90729
HIIE	Post exercise	KLHDC4	0.614579	12.7381	5.47581	6.34293	2.05932e-07	0.000621812	3.20634
HIIE	Post exercise	CLTCL1	0.895726	12.4257	4.86624	4.02183	3.12921e-06	0.0062991	2.20072
HIIE	Post exercise	CD99	0.941087	12.4064	4.49444	2.69603	1.48766e-05	0.0166134	1.77954
HIIE	Post exercise	GMEB1	0.791925	13.5994	4.54643	2.87703	1.20207e-05	0.0166134	1.77954
HIIE	Post exercise	NCAM1	0.821201	12.8496	4.46894	2.60781	1.65061e-05	0.0166134	1.77954
HIIE	Post exercise	CHST2	0.485655	12.3213	4.4302	2.47518	1.92979e-05	0.0166486	1.77862
HIIE	Post exercise	UROS	0.527015	12.6419	4.30514	2.04964	3.1883e-05	0.0213935	1.66972
HIIE	Post exercise	WDR24	0.407425	13.0485	4.32633	2.12168	2.9282e-05	0.0213935	1.66972
HIIE	Post exercise	FAM118A	-0.596916	11.6946	-4.16447	1.58245	5.53791e-05	0.0334434	1.47569
HIIE	Post exercise	TRMT61B	-0.427752	12.9203	-4.13598	1.48974	6.17979e-05	0.0339271	1.46945
HIIE	Post exercise	GZMA	0.532778	17.7749	2.43688	-3.10722	0.016119	0.611832	0.213368
HIIE	Post exercise	CLEC12A	-0.71457	14.2258	-3.79451	0.410113	0.000222637	0.0918413	1.03696
HIIE	Post exercise	DNTTIP1	0.548913	13.038	3.81968	0.487189	0.000203112	0.0918413	1.03696
HIIE	Post exercise	VMA21	0.540941	14.7105	3.78782	0.389688	0.00022812	0.0918413	1.03696
HIIE	Post exercise	MARF1	0.55436	17.7575	3.76596	0.323145	0.000246945	0.0932064	1.03055
HIIE	Post exercise	CELA3B	-0.528232	19.7392	-3.68021	0.0651079	0.00033597	0.112718	0.948007
HIIE	Post exercise	OSBPL5	0.56127	12.3228	3.68605	0.0825244	0.000329055	0.112718	0.948007
HIIE	Post exercise	RNF7	1.21928	14.029	3.61212	-0.13644	0.00042749	0.135874	0.866863
HIIE	Post exercise	UBFD1	-0.527814	14.9304	-3.52623	-0.386312	0.000576627	0.174113	0.75917
HIIE	Post exercise	KLHL22	-0.443779	12.8454	-3.50435	-0.449193	0.0006218	0.178812	0.747603
HIIE	Post exercise	FNTB	-0.207071	15.1652	-3.48435	-0.506089	0.000665706	0.182736	0.738175
HIIE	Post exercise	VAMP2	0.313939	14.0667	3.44845	-0.608204	0.000752593	0.197605	0.704203
HIIE	Post exercise	ABCB1	0.213413	14.0236	3.39777	-0.750628	0.000893189	0.206093	0.685937
HIIE	Post exercise	CLIC3	0.571924	13.724	3.41624	-0.699165	0.000839601	0.206093	0.685937
HIIE	Post exercise	TBX21	0.583363	14.1248	3.38862	-0.776438	0.000921428	0.206093	0.685937
HIIE	Post exercise	TPRA1	0.386125	13.9167	3.40301	-0.736234	0.000877897	0.206093	0.685937
HIIE	Post exercise	MIEN1	0.491397	14.7142	3.3734	-0.818804	0.00096966	0.209135	0.679574
HIIE	Post exercise	FCGR1A	-0.535622	13.6569	-3.28175	-1.07057	0.0013138	0.257977	0.588418
MICE	Post exercise	GZMA	0.777286	17.7749	3.55524	-0.305409	0.000521482	0.136923	0.863523
HIIE	Post exercise	PRMT2	-0.312189	13.9426	-3.27928	-1.07716	0.00132428	0.257977	0.588418
HIIE	Post exercise	GZMB	0.661645	16.3009	3.28996	-1.04825	0.00127885	0.257977	0.588418
HIIE	Post exercise	CYB5A	0.546464	14.0465	3.23753	-1.18998	0.00151788	0.277772	0.556312
HIIE	Post exercise	ADGRG1	0.315004	14.0692	3.19389	-1.30647	0.00174787	0.310453	0.508004
HIIE	Post exercise	CCDC97	0.345672	12.1093	3.13111	-1.47152	0.00213542	0.316115	0.500155
HIIE	Post exercise	CRIPT	-0.540908	13.5228	-3.14098	-1.44593	0.00207016	0.316115	0.500155
HIIE	Post exercise	CSNK1G3	-0.349687	13.4618	-3.12391	-1.49048	0.00218532	0.316115	0.500155
HIIE	Post exercise	DCUN1D3	0.431526	12.3944	3.13754	-1.45491	0.00209286	0.316115	0.500155
HIIE	Post exercise	GBA1	-0.238363	15.2444	-3.12195	-1.49547	0.00219852	0.316115	0.500155
HIIE	Post exercise	POLR1G	0.397519	14.751	3.16917	-1.37185	0.00189212	0.316115	0.500155
HIIE	Post exercise	SERPINB2	-0.522482	15.1303	-3.13755	-1.45489	0.00209281	0.316115	0.500155
HIIE	Post exercise	VRK2	0.469387	12.3822	3.17436	-1.35817	0.00186097	0.316115	0.500155
HIIE	Post exercise	CEP135	0.681053	13.0151	3.10087	-1.55031	0.00235022	0.330069	0.481396
HIIE	Post exercise	QPCT	0.77771	14.0275	3.06452	-1.64395	0.00263404	0.354057	0.450927
HIIE	Post exercise	TLR1	0.464747	14.0454	3.057	-1.66321	0.0026966	0.354057	0.450927
HIIE	Post exercise	TMEM14C	-0.591963	14.7123	-3.05696	-1.6633	0.0026969	0.354057	0.450927
HIIE	Post exercise	TXLNG	-0.537228	13.3472	-3.01783	-1.7628	0.00304496	0.391245	0.407552
HIIE	Post exercise	FAM78A	-0.281545	14.5881	-3.00325	-1.7996	0.00318494	0.392527	0.40613
HIIE	Post exercise	MST1	-0.392792	13.6522	-3.00828	-1.78695	0.00313607	0.392527	0.40613
HIIE	Post exercise	JPT1	0.464738	13.9401	2.99431	-1.8221	0.00327371	0.395399	0.402965
HIIE	Post exercise	DMXL2	0.426322	13.1786	2.97409	-1.87275	0.00348289	0.412415	0.384666
MICE	Post exercise	GZMB	0.88668	16.3009	4.40892	2.39241	2.10493e-05	0.0265121	1.57656
HIIE	Post exercise	HLA-F	0.393868	13.964	2.92886	-1.98497	0.00399599	0.438759	0.357774
HIIE	Post exercise	LRRC14	0.197753	12.8594	2.92935	-1.98363	0.00398924	0.438759	0.357774
HIIE	Post exercise	PLOD3	-0.186325	16.4591	-2.94007	-1.95715	0.00386186	0.438759	0.357774
HIIE	Post exercise	SPI1	-0.410294	14.522	-2.91383	-2.02193	0.00418128	0.442995	0.353601
HIIE	Post exercise	TNIP2	0.314586	12.236	2.91559	-2.01747	0.00415829	0.442995	0.353601
HIIE	Post exercise	IGFBP3	-0.423037	13.2203	-2.89632	-2.06479	0.00440713	0.444916	0.351722
HIIE	Post exercise	JAML	-0.532413	13.5138	-2.89532	-2.06724	0.00442042	0.444916	0.351722
HIIE	Post exercise	STUB1	0.19149	15.642	2.90132	-2.05245	0.00434065	0.444916	0.351722
HIIE	Post exercise	MRPS14	-0.425834	13.7533	-2.88685	-2.08786	0.00453382	0.448848	0.3479
HIIE	Post exercise	CES1	-0.419394	17.7091	-2.85571	-2.1633	0.00497445	0.467586	0.330139
HIIE	Post exercise	COLGALT1	-0.283263	17.1045	-2.85178	-2.17277	0.0050328	0.467586	0.330139
HIIE	Post exercise	PAXX	0.284727	17.3397	2.85187	-2.17256	0.00503147	0.467586	0.330139
HIIE	Post exercise	TLR8	-0.360671	13.9401	-2.85324	-2.16927	0.00501113	0.467586	0.330139
HIIE	Post exercise	NDUFA1	-0.739151	14.7537	-2.84059	-2.19968	0.00520229	0.476009	0.322385
HIIE	Post exercise	CD5L	0.562064	12.4824	2.81973	-2.24957	0.00553212	0.498634	0.302218
HIIE	Post exercise	PTRH1	0.260765	12.8012	2.81439	-2.26219	0.00561863	0.498984	0.301913
HIIE	Post exercise	NLRC3	0.290851	11.8274	2.80875	-2.27561	0.00571239	0.499958	0.301066
HIIE	Post exercise	CDC42SE1	0.598001	14.367	2.79704	-2.30348	0.00591255	0.504409	0.297217
HIIE	Post exercise	IL4I1	0.387361	14.2016	2.79602	-2.30591	0.00593029	0.504409	0.297217
HIIE	Post exercise	CLCN4	-0.448309	14.1313	-2.77169	-2.36328	0.00636581	0.528447	0.276998
HIIE	Post exercise	SLC12A9	-0.183555	14.6859	-2.77043	-2.36612	0.00638792	0.528447	0.276998
HIIE	Post exercise	ACSL1	-0.147304	17.6996	-2.75364	-2.40543	0.00670614	0.536888	0.270116
HIIE	Post exercise	C1orf35	0.549575	13.0712	2.75688	-2.39797	0.00664485	0.536888	0.270116
HIIE	Post exercise	NIPSNAP3B	-0.322681	16.4268	-2.75111	-2.41146	0.00675667	0.536888	0.270116
HIIE	Post exercise	C8B	-0.288227	14.593	-2.72433	-2.47366	0.0072977	0.537449	0.269663
HIIE	Post exercise	EBP	-0.321516	17.3645	-2.7417	-2.43338	0.0069425	0.537449	0.269663
HIIE	Post exercise	FGL2	-0.403532	11.7603	-2.72635	-2.46899	0.00725561	0.537449	0.269663
HIIE	Post exercise	GNLY	0.879929	16.3629	2.73983	-2.43772	0.00697988	0.537449	0.269663
HIIE	Post exercise	STBD1	0.49952	13.165	2.72877	-2.4634	0.00720552	0.537449	0.269663
HIIE	Post exercise	SYNE2	0.265524	12.9856	2.72864	-2.4636	0.00720697	0.537449	0.269663
HIIE	Post exercise	DEFA3	1.32019	21.5578	2.71858	-2.48696	0.00741902	0.5398	0.267767
HIIE	Post exercise	RAF1	0.415134	13.5891	2.71437	-2.49666	0.00750884	0.539832	0.267742
HIIE	Post exercise	TMED2	-0.435327	17.301	-2.70848	-2.51023	0.00763627	0.542534	0.265573
HIIE	Post exercise	CSTA	-0.698485	14.6182	-2.67802	-2.58	0.00832735	0.542776	0.26538
HIIE	Post exercise	FOXO3	0.375105	12.9258	2.68253	-2.56971	0.00822148	0.542776	0.26538
HIIE	Post exercise	GPSM3	0.284873	14.5354	2.70109	-2.52723	0.00779905	0.542776	0.26538
HIIE	Post exercise	HEBP2	-0.305314	15.1215	-2.67669	-2.58302	0.00835869	0.542776	0.26538
HIIE	Post exercise	PAM	-0.338785	13.0155	-2.68351	-2.56746	0.00819861	0.542776	0.26538
HIIE	Post exercise	PLOD1	-0.217114	14.6197	-2.68433	-2.56552	0.0081785	0.542776	0.26538
HIIE	Post exercise	RBM6	0.460385	14.307	2.68745	-2.55847	0.0081075	0.542776	0.26538
HIIE	Post exercise	SNTB2	0.188721	13.7634	2.69296	-2.54578	0.00798033	0.542776	0.26538
HIIE	Post exercise	ATG2A	0.168003	12.9077	2.64108	-2.66356	0.00923937	0.546095	0.262732
HIIE	Post exercise	CTSB	-0.298361	17.5604	-2.63826	-2.66999	0.00931409	0.546095	0.262732
HIIE	Post exercise	H1-0	-0.482056	17.4683	-2.66763	-2.60363	0.00857557	0.546095	0.262732
HIIE	Post exercise	MAGT1	-0.204843	17.4686	-2.63978	-2.66656	0.00927439	0.546095	0.262732
HIIE	Post exercise	PACSIN1	0.561362	13.5218	2.64378	-2.65757	0.00917107	0.546095	0.262732
HIIE	Post exercise	PADI4	-0.432622	16.5106	-2.64611	-2.65232	0.0091113	0.546095	0.262732
HIIE	Post exercise	PPP2R2D	-0.36888	15.2881	-2.64551	-2.65367	0.00912662	0.546095	0.262732
HIIE	Post exercise	RAB34	-0.360235	14.1805	-2.647	-2.65031	0.00908855	0.546095	0.262732
HIIE	Post exercise	RAB3D	-0.280062	15.7163	-2.66322	-2.61363	0.00868297	0.546095	0.262732
HIIE	Post exercise	ZFP62	-0.654789	10.6447	-2.6498	-2.64398	0.00901718	0.546095	0.262732
HIIE	Post exercise	AGPAT2	-0.371075	15.1225	-2.62888	-2.69103	0.0095616	0.546433	0.262463
HIIE	Post exercise	AP2S1	-0.155017	18.6117	-2.62436	-2.70109	0.00968179	0.546433	0.262463
HIIE	Post exercise	LRRK2	-0.33288	13.0424	-2.62705	-2.69514	0.00961062	0.546433	0.262463
HIIE	Post exercise	PDE6D	-0.445351	15.5728	-2.6317	-2.68471	0.00948654	0.546433	0.262463
HIIE	Post exercise	TNK2	-0.265403	13.5641	-2.61258	-2.72744	0.0100056	0.559481	0.252214
HIIE	Post exercise	MTCH1	-0.215441	15.7134	-2.60815	-2.73734	0.0101302	0.56125	0.250844
HIIE	Post exercise	CD7	0.407215	15.9367	2.60473	-2.74493	0.0102267	0.561448	0.250691
HIIE	Post exercise	CTSC	0.2036	18.4027	2.59815	-2.75954	0.010415	0.565699	0.247414
HIIE	Post exercise	FAM3A	-0.257105	13.5822	-2.59227	-2.77253	0.0105852	0.565699	0.247414
HIIE	Post exercise	GNB1L	-0.367266	12.8752	-2.59429	-2.7681	0.010527	0.565699	0.247414
HIIE	Post exercise	ATP5F1E	-0.19647	17.7762	-2.56552	-2.83152	0.0113961	0.568767	0.245065
HIIE	Post exercise	CHMP1A	-0.278061	16.3496	-2.56572	-2.83108	0.0113897	0.568767	0.245065
HIIE	Post exercise	CNRIP1	-0.449662	12.0706	-2.57417	-2.81252	0.0111281	0.568767	0.245065
HIIE	Post exercise	COMMD3	0.175947	13.6629	2.57052	-2.82047	0.011239	0.568767	0.245065
HIIE	Post exercise	NCALD	0.536128	12.7397	2.57997	-2.79974	0.0109518	0.568767	0.245065
HIIE	Post exercise	PTPN2	-0.290768	14.3187	-2.56596	-2.83055	0.0113822	0.568767	0.245065
HIIE	Post exercise	RAB6C	-0.289419	17.0981	-2.58075	-2.79803	0.0109283	0.568767	0.245065
HIIE	Post exercise	SKI	-0.431965	11.62	-2.57146	-2.81846	0.0112113	0.568767	0.245065
HIIE	Post exercise	TAF7	0.329509	12.8867	2.56244	-2.83826	0.0114926	0.568884	0.244976
HIIE	Post exercise	TNFAIP2	-0.219337	14.5614	-2.55636	-2.85153	0.011685	0.573703	0.241313
HIIE	Post exercise	DAGLB	-0.133304	15.3215	-2.54619	-2.87369	0.0120138	0.575803	0.239726
HIIE	Post exercise	MRPS15	-0.368626	14.7567	-2.55122	-2.86278	0.0118511	0.575803	0.239726
HIIE	Post exercise	WDR20	0.296579	13.8777	2.54787	-2.87009	0.0119602	0.575803	0.239726
HIIE	Post exercise	FCN1	-0.378279	17.3117	-2.53739	-2.89289	0.012307	0.585211	0.232687
HIIE	Post exercise	APOBEC3F	0.258779	14.8566	2.52706	-2.91528	0.0126578	0.588003	0.23062
HIIE	Post exercise	CST7	0.424385	14.6571	2.53218	-2.90421	0.012483	0.588003	0.23062
HIIE	Post exercise	RPS6KB1	0.328609	12.8979	2.52942	-2.91018	0.012577	0.588003	0.23062
HIIE	Post exercise	AFG2B	0.277715	13.3473	2.51451	-2.94236	0.0130956	0.59018	0.229016
HIIE	Post exercise	CPB2	-0.226274	15.5108	-2.51921	-2.93223	0.01293	0.59018	0.229016
HIIE	Post exercise	CPVL	-0.261465	17.2822	-2.51816	-2.9345	0.0129669	0.59018	0.229016
HIIE	Post exercise	SUMF1	-0.174694	14.7937	-2.51568	-2.93978	0.0130527	0.59018	0.229016
HIIE	Post exercise	DHX57	-0.288898	13.6769	-2.50682	-2.9589	0.0133707	0.594678	0.225718
HIIE	Post exercise	IDS	0.406466	14.7556	2.49813	-2.97754	0.0136877	0.594678	0.225718
HIIE	Post exercise	MNDA	-0.341261	18.0629	-2.50007	-2.97338	0.0136163	0.594678	0.225718
HIIE	Post exercise	PSMC4	0.174368	18.3536	2.50276	-2.9676	0.0135174	0.594678	0.225718
HIIE	Post exercise	SLC35A1	-0.263697	13.2528	-2.50423	-2.96443	0.0134637	0.594678	0.225718
HIIE	Post exercise	KCTD12	-0.313889	17.2994	-2.49316	-2.98818	0.0138723	0.598391	0.223015
HIIE	Post exercise	HK2	-0.217821	16.4892	-2.48065	-3.01485	0.014346	0.601636	0.220666
HIIE	Post exercise	LIPT2	-0.315209	13.7893	-2.48772	-2.99979	0.0140765	0.601636	0.220666
HIIE	Post exercise	NAIP	-0.271409	13.5734	-2.48285	-3.01017	0.0142617	0.601636	0.220666
HIIE	Post exercise	SDHD	-0.364206	16.6657	-2.48303	-3.00978	0.0142547	0.601636	0.220666
HIIE	Post exercise	HCK	-0.283743	17.6067	-2.47405	-3.02887	0.0146015	0.603963	0.21899
HIIE	Post exercise	TSNAX	-0.25136	15.927	-2.47439	-3.02816	0.0145885	0.603963	0.21899
HIIE	Post exercise	CHID1	-0.196832	17.1595	-2.4703	-3.03683	0.0147489	0.604355	0.218708
HIIE	Post exercise	VCAN	-0.380902	16.6818	-2.46872	-3.04018	0.0148112	0.604355	0.218708
HIIE	Post exercise	VPS37B	0.346882	13.886	2.46524	-3.04755	0.0149495	0.605907	0.217594
HIIE	Post exercise	SMAD4	0.474364	13.4012	2.4607	-3.05715	0.0151316	0.609196	0.215243
HIIE	Post exercise	AAGAB	-0.256777	13.7565	-2.44088	-3.09885	0.0159495	0.610584	0.214255
HIIE	Post exercise	ATP6V0C	-0.468224	17.7939	-2.44293	-3.09455	0.0158631	0.610584	0.214255
HIIE	Post exercise	ELMOD2	-0.193995	16.5431	-2.45345	-3.07243	0.0154261	0.610584	0.214255
HIIE	Post exercise	LDLRAP1	-0.213799	15.7368	-2.44358	-3.09318	0.0158356	0.610584	0.214255
HIIE	Post exercise	REPIN1	0.388043	11.6086	2.44028	-3.10011	0.0159749	0.610584	0.214255
HIIE	Post exercise	SIL1	-0.235688	14.0469	-2.44537	-3.08939	0.0157599	0.610584	0.214255
HIIE	Post exercise	TLR2	-0.363211	15.2797	-2.45319	-3.07299	0.015437	0.610584	0.214255
HIIE	Post exercise	VANGL1	-0.240093	12.3417	-2.44629	-3.08743	0.0157204	0.610584	0.214255
HIIE	Post exercise	GZMH	0.664204	16.6454	2.93311	-1.97449	0.00394497	0.438759	0.357774
HIIE	Post exercise	ND1	-0.539805	15.751	-2.43475	-3.11168	0.0162101	0.611832	0.213368
HIIE	Post exercise	AGPAT5	-0.214029	15.1566	-2.41746	-3.14774	0.0169666	0.619007	0.208305
HIIE	Post exercise	ALG10	-0.339294	15.0855	-2.42075	-3.14089	0.0168203	0.619007	0.208305
HIIE	Post exercise	CD4	-0.398093	15.2388	-2.42151	-3.13931	0.0167866	0.619007	0.208305
HIIE	Post exercise	ENOSF1	0.354996	13.2695	2.42371	-3.13473	0.0166897	0.619007	0.208305
HIIE	Post exercise	GALNT2	-0.172009	16.3515	-2.42539	-3.13119	0.0166146	0.619007	0.208305
HIIE	Post exercise	NBEAL1	-0.171996	15.848	-2.41633	-3.15002	0.0170152	0.619007	0.208305
HIIE	Post exercise	ATAD2	-0.352782	15.0598	-2.41304	-3.15691	0.0171648	0.620707	0.207113
HIIE	Post exercise	DGKH	0.366284	12.8595	2.40407	-3.1755	0.0175736	0.622169	0.206091
HIIE	Post exercise	GFER	0.207913	14.305	2.40358	-3.17647	0.0175948	0.622169	0.206091
HIIE	Post exercise	MAEA	0.146891	14.7134	2.40628	-3.17086	0.01747	0.622169	0.206091
HIIE	Post exercise	UBP1	-0.161265	13.8585	-2.40308	-3.17749	0.0176173	0.622169	0.206091
HIIE	Post exercise	DHRSX	-0.320958	13.844	-2.38963	-3.20526	0.0182495	0.640748	0.193312
HIIE	Post exercise	DYNLRB2	0.185838	16.241	2.37327	-3.23881	0.0190433	0.651455	0.186115
HIIE	Post exercise	MEFV	-0.308835	13.9304	-2.378	-3.22914	0.0188109	0.651455	0.186115
HIIE	Post exercise	NIPSNAP3A	-0.259613	18.7985	-2.37824	-3.22865	0.0187992	0.651455	0.186115
HIIE	Post exercise	SPRYD4	-0.160528	16.4768	-2.37107	-3.24325	0.0191504	0.651455	0.186115
HIIE	Post exercise	SURF1	-0.16969	16.5325	-2.37006	-3.24534	0.0192017	0.651455	0.186115
HIIE	Post exercise	TIMP2	-0.396526	14.755	-2.37417	-3.23697	0.0189989	0.651455	0.186115
HIIE	Post exercise	MRPL55	-0.245739	15.3069	-2.36654	-3.25254	0.0193785	0.65378	0.184569
HIIE	Post exercise	KRT5	0.394552	12.7875	2.36219	-3.26141	0.0195982	0.657519	0.182092
HIIE	Post exercise	ACAD9	-0.0839811	16.4845	-2.34953	-3.28705	0.0202472	0.662788	0.178625
HIIE	Post exercise	AGA	0.364967	15.808	2.34617	-3.29392	0.0204258	0.662788	0.178625
HIIE	Post exercise	COMMD3-BMI1	0.296468	12.4409	2.3435	-3.29931	0.0205666	0.662788	0.178625
HIIE	Post exercise	COPS7B	0.140233	16.1509	2.34072	-3.30488	0.020712	0.662788	0.178625
HIIE	Post exercise	HAUS3	0.291192	12.5395	2.34499	-3.29629	0.0204876	0.662788	0.178625
HIIE	Post exercise	LRRC25	-0.403135	14.544	-2.3512	-3.28372	0.0201624	0.662788	0.178625
HIIE	Post exercise	MAN2A1	-0.182239	16.0573	-2.33758	-3.31124	0.0208814	0.662788	0.178625
HIIE	Post exercise	PRSS57	-0.46944	13.3618	-2.33652	-3.31339	0.0209387	0.662788	0.178625
HIIE	Post exercise	STX5	-0.117434	15.3861	-2.34918	-3.28777	0.0202658	0.662788	0.178625
HIIE	Post exercise	TADA3	0.521372	10.9299	2.35092	-3.28429	0.020177	0.662788	0.178625
HIIE	Post exercise	TXNDC12	-0.445315	15.9342	-2.33608	-3.31428	0.0209625	0.662788	0.178625
HIIE	Post exercise	CFD	-0.312123	14.9069	-2.3319	-3.32269	0.0211883	0.662986	0.178496
HIIE	Post exercise	TAPBP	0.117628	18.96	2.33251	-3.32142	0.0211531	0.662986	0.178496
HIIE	Post exercise	ZNF668	-0.296133	11.6188	-2.32968	-3.32711	0.0213076	0.663282	0.178302
HIIE	Post exercise	ALDH2	-0.311174	18.2472	-2.32634	-3.33385	0.0214921	0.665593	0.176791
HIIE	Post exercise	FCGRT	-0.331716	14.8446	-2.32342	-3.33971	0.0216533	0.667165	0.175767
HIIE	Post exercise	FHIT	-0.142856	14.7775	-2.31761	-3.3513	0.021975	0.67178	0.172773
HIIE	Post exercise	SYS1	-0.291208	14.0975	-2.31675	-3.35307	0.0220256	0.67178	0.172773
HIIE	Post exercise	UQCC1	-0.235143	14.869	-2.31425	-3.35807	0.0221665	0.672681	0.172191
HIIE	Post exercise	AKR1C3	0.351505	16.3699	2.29097	-3.40434	0.0235168	0.676276	0.169876
HIIE	Post exercise	CARD11	0.248173	14.4344	2.2973	-3.39181	0.0231429	0.676276	0.169876
HIIE	Post exercise	CCDC134	-0.325999	13.1295	-2.29442	-3.39751	0.0233123	0.676276	0.169876
HIIE	Post exercise	CYP51A1	-0.347468	13.7482	-2.30988	-3.36678	0.0224143	0.676276	0.169876
HIIE	Post exercise	DNAJC3	-0.132758	17.7885	-2.30579	-3.37488	0.0226468	0.676276	0.169876
HIIE	Post exercise	KIFAP3	0.22062	12.2081	2.30214	-3.38215	0.0228579	0.676276	0.169876
HIIE	Post exercise	MTG2	0.445651	10.8847	2.29225	-3.40182	0.023441	0.676276	0.169876
HIIE	Post exercise	NDUFAF4	0.181148	13.3655	2.29869	-3.38899	0.0230589	0.676276	0.169876
HIIE	Post exercise	PRF1	0.501029	18.9956	2.29159	-3.40311	0.0234799	0.676276	0.169876
HIIE	Post exercise	SIRPA	-0.364266	15.146	-2.29406	-3.39823	0.0233336	0.676276	0.169876
HIIE	Post exercise	TRAPPC9	0.086633	15.1395	2.29728	-3.3918	0.0231418	0.676276	0.169876
HIIE	Post exercise	OGA	0.170671	15.3774	2.28172	-3.42259	0.0240717	0.682484	0.165908
HIIE	Post exercise	SLC7A5	0.158721	14.4034	2.2853	-3.4155	0.0238542	0.682484	0.165908
HIIE	Post exercise	TFAM	-0.158648	18.1757	-2.28274	-3.42058	0.0240101	0.682484	0.165908
HIIE	Post exercise	CDKN2D	0.442789	12.8989	2.27762	-3.43069	0.0243235	0.683321	0.165375
HIIE	Post exercise	LPCAT1	0.234532	15.5059	2.27388	-3.43805	0.0245539	0.683321	0.165375
HIIE	Post exercise	LRP1	-0.341172	14.1227	-2.27523	-3.43539	0.0244703	0.683321	0.165375
HIIE	Post exercise	YWHAE	-0.110462	21.9302	-2.27628	-3.4333	0.0244039	0.683321	0.165375
HIIE	Post exercise	PLBD1	-0.419744	16.8747	-2.26776	-3.45006	0.0249349	0.690742	0.160684
HIIE	Post exercise	MTHFS	-0.172549	15.2362	-2.26385	-3.4577	0.0251796	0.694336	0.158431
HIIE	Post exercise	SCPEP1	-0.199904	15.6049	-2.25797	-3.46922	0.0255551	0.701486	0.153981
HIIE	Post exercise	ACCS	-1.05531	12.7116	-2.25466	-3.47567	0.0257675	0.702347	0.153449
HIIE	Post exercise	AGK	0.145834	17.2343	2.25203	-3.48075	0.0259353	0.702347	0.153449
HIIE	Post exercise	PARL	-0.279462	14.9527	-2.25383	-3.47729	0.0258212	0.702347	0.153449
HIIE	Post exercise	ADA	0.254392	15.6081	2.23345	-3.51685	0.0271676	0.707178	0.150471
HIIE	Post exercise	AIF1	-0.463703	14.4945	-2.23991	-3.50435	0.0267345	0.707178	0.150471
HIIE	Post exercise	FUCA2	-0.148747	15.3381	-2.24071	-3.50277	0.0266793	0.707178	0.150471
HIIE	Post exercise	GRK4	0.440955	12.8567	2.23984	-3.50449	0.0267391	0.707178	0.150471
HIIE	Post exercise	IGHV3-66	-0.54037	15.8933	-2.24159	-3.50109	0.0266226	0.707178	0.150471
HIIE	Post exercise	MRPL35	0.274469	14.2179	2.2364	-3.51115	0.0269693	0.707178	0.150471
HIIE	Post exercise	NVL	0.386659	12.9143	2.2429	-3.49855	0.026536	0.707178	0.150471
HIIE	Post exercise	PLPP6	-0.272296	13.2788	-2.23561	-3.51268	0.0270224	0.707178	0.150471
HIIE	Post exercise	RAB6A	-0.164616	20.7005	-2.2344	-3.51502	0.0271038	0.707178	0.150471
HIIE	Post exercise	CARD6	-0.294351	13.4929	-2.22399	-3.53511	0.0278136	0.720886	0.142133
HIIE	Post exercise	ACYP1	-0.171008	16.3499	-2.21565	-3.55114	0.0283937	0.723462	0.140584
HIIE	Post exercise	CALU	-0.338506	16.4279	-2.20623	-3.56918	0.0290615	0.723462	0.140584
HIIE	Post exercise	CCNYL1	-0.171829	14.4147	-2.20551	-3.57053	0.029111	0.723462	0.140584
HIIE	Post exercise	CNBP	0.443461	13.4082	2.2182	-3.54624	0.0282151	0.723462	0.140584
HIIE	Post exercise	ERLIN1	-0.208069	16.9437	-2.2097	-3.56255	0.0288143	0.723462	0.140584
HIIE	Post exercise	NFATC3	0.281644	13.5339	2.20978	-3.5624	0.0288086	0.723462	0.140584
HIIE	Post exercise	RAB31	-0.208533	16.5043	-2.20821	-3.5654	0.0289203	0.723462	0.140584
HIIE	Post exercise	SLC66A2	-0.105103	14.0128	-2.20559	-3.57037	0.0291051	0.723462	0.140584
HIIE	Post exercise	TOMM34	-0.162229	14.3068	-2.2109	-3.56021	0.0287263	0.723462	0.140584
HIIE	Post exercise	ZNF143	0.361447	14.341	2.21855	-3.54557	0.0281906	0.723462	0.140584
HIIE	Post exercise	IMPACT	-0.285848	12.7744	-2.20259	-3.57614	0.0293235	0.725756	0.139209
HIIE	Post exercise	ACOT2	-0.403714	13.5393	-2.19982	-3.58141	0.0295238	0.727731	0.138029
HIIE	Post exercise	GTF2H4	-1.05076	12.9412	-2.19575	-3.58917	0.0298208	0.732064	0.135451
HIIE	Post exercise	MGST3	-0.280924	16.7004	-2.19231	-3.59572	0.0300741	0.735293	0.13354
HIIE	Post exercise	ADGRE5	-0.326019	14.3147	-2.18808	-3.60374	0.0303874	0.736987	0.13254
HIIE	Post exercise	ZAP70	0.301654	15.6838	2.18827	-3.60339	0.0303734	0.736987	0.13254
HIIE	Post exercise	ACSS2	-0.117056	16.468	-2.14609	-3.68266	0.0336551	0.737702	0.132119
HIIE	Post exercise	ANXA11	0.459636	19.4902	2.14129	-3.69163	0.0340501	0.737702	0.132119
HIIE	Post exercise	APOL2	0.287782	12.7893	2.16508	-3.64717	0.0321429	0.737702	0.132119
HIIE	Post exercise	ARSB	-0.254134	14.6236	-2.15278	-3.67021	0.0331171	0.737702	0.132119
HIIE	Post exercise	BABAM2	0.170174	15.1062	2.14641	-3.68208	0.0336302	0.737702	0.132119
HIIE	Post exercise	CD81	0.277199	15.1771	2.14017	-3.6937	0.034142	0.737702	0.132119
HIIE	Post exercise	CORO1B	-0.162673	19.7272	-2.15281	-3.67015	0.0331144	0.737702	0.132119
HIIE	Post exercise	COTL1	-0.1072	21.5734	-2.13912	-3.69563	0.0342262	0.737702	0.132119
HIIE	Post exercise	CTSS	-0.349264	18.5684	-2.13794	-3.69784	0.0343259	0.737702	0.132119
HIIE	Post exercise	FERRY3	0.26148	11.7834	2.14198	-3.69032	0.0339915	0.737702	0.132119
HIIE	Post exercise	GET1	-0.294686	15.4301	-2.15985	-3.65697	0.0325537	0.737702	0.132119
HIIE	Post exercise	GOLT1B	-0.295527	17.7082	-2.1658	-3.6458	0.0320862	0.737702	0.132119
HIIE	Post exercise	GOSR1	-0.219393	15.9517	-2.14511	-3.68451	0.0337369	0.737702	0.132119
HIIE	Post exercise	GPKOW	-0.317171	13.5531	-2.18175	-3.61573	0.0308618	0.737702	0.132119
HIIE	Post exercise	KXD1	-0.453453	13.209	-2.1734	-3.63151	0.0314981	0.737702	0.132119
HIIE	Post exercise	MFSD6	0.342328	13.955	2.16728	-3.64302	0.0319707	0.737702	0.132119
HIIE	Post exercise	NCF1	-0.252981	16.5018	-2.14654	-3.68185	0.0336209	0.737702	0.132119
HIIE	Post exercise	NCF4	-0.309945	16.01	-2.14892	-3.67741	0.0334277	0.737702	0.132119
HIIE	Post exercise	NDUFB10	-0.223844	18.9093	-2.16506	-3.64721	0.0321445	0.737702	0.132119
HIIE	Post exercise	NLN	-0.180603	15.4358	-2.15261	-3.67052	0.0331305	0.737702	0.132119
HIIE	Post exercise	PPP6R2	0.294378	14.0214	2.14782	-3.67946	0.0335165	0.737702	0.132119
HIIE	Post exercise	PRAM1	-0.289217	17.2176	-2.17912	-3.62072	0.0310614	0.737702	0.132119
HIIE	Post exercise	RAB13	-0.164723	19.0649	-2.16656	-3.64438	0.0320271	0.737702	0.132119
HIIE	Post exercise	RBM47	-0.375029	12.5396	-2.16401	-3.64918	0.0322268	0.737702	0.132119
HIIE	Post exercise	RPS12	0.335097	18.354	2.14844	-3.67831	0.0334667	0.737702	0.132119
HIIE	Post exercise	RTRAF	0.176851	16.2811	2.15499	-3.66607	0.0329396	0.737702	0.132119
HIIE	Post exercise	SEC11C	0.217615	14.8017	2.157	-3.66232	0.03278	0.737702	0.132119
HIIE	Post exercise	SLC22A18	-0.168616	15.8095	-2.15859	-3.65933	0.0326531	0.737702	0.132119
HIIE	Post exercise	SLC25A10	-0.143404	14.998	-2.1662	-3.64502	0.0320523	0.737702	0.132119
HIIE	Post exercise	TMEM65	0.208804	15.1713	2.14823	-3.67871	0.033484	0.737702	0.132119
HIIE	Post exercise	TOR1A	-0.123359	15.5578	-2.16825	-3.64117	0.031893	0.737702	0.132119
HIIE	Post exercise	ZDHHC21	-0.251795	11.9732	-2.1584	-3.65966	0.0326664	0.737702	0.132119
HIIE	Post exercise	SUMF2	-0.221967	15.1096	-2.12992	-3.71271	0.0349956	0.749426	0.125271
HIIE	Post exercise	HDDC2	0.206231	15.371	2.12831	-3.71568	0.0351309	0.749665	0.125133
HIIE	Post exercise	AMT	-0.17388	14.3007	-2.1047	-3.75909	0.0371715	0.752384	0.12356
HIIE	Post exercise	B4GALT1	-0.223568	15.6241	-2.10072	-3.76639	0.037528	0.752384	0.12356
HIIE	Post exercise	CCDC90B	0.307264	12.5741	2.11855	-3.7337	0.0359639	0.752384	0.12356
HIIE	Post exercise	CCNK	0.312538	14.6724	2.11687	-3.73679	0.0361089	0.752384	0.12356
HIIE	Post exercise	CYBB	-0.290823	17.216	-2.11189	-3.74595	0.0365417	0.752384	0.12356
HIIE	Post exercise	DDX56	-0.312794	13.229	-2.10477	-3.75899	0.0371677	0.752384	0.12356
HIIE	Post exercise	GHITM	-0.436524	16.6976	-2.12348	-3.72461	0.0355412	0.752384	0.12356
HIIE	Post exercise	GYG1	-0.177916	16.7474	-2.09841	-3.77062	0.0377356	0.752384	0.12356
HIIE	Post exercise	ISOC2	-0.275824	15.7794	-2.113	-3.7439	0.0364447	0.752384	0.12356
HIIE	Post exercise	ITFG1	0.220043	13.2443	2.09847	-3.77048	0.0377283	0.752384	0.12356
HIIE	Post exercise	MAP1LC3B	-0.312061	16.3822	-2.10269	-3.7628	0.0373527	0.752384	0.12356
HIIE	Post exercise	MRPS21	-0.379892	14.7116	-2.1119	-3.74592	0.0365407	0.752384	0.12356
HIIE	Post exercise	MTPN	0.212579	18.4943	2.10416	-3.76011	0.0372222	0.752384	0.12356
HIIE	Post exercise	PDCL3	0.1471	14.0274	2.12175	-3.72777	0.035686	0.752384	0.12356
HIIE	Post exercise	PSMC2	0.13812	17.6556	2.09864	-3.77016	0.0377119	0.752384	0.12356
HIIE	Post exercise	PTP4A3	-0.288317	13.0994	-2.09825	-3.77091	0.03775	0.752384	0.12356
HIIE	Post exercise	RAB14	-0.100305	19.4811	-2.10829	-3.75251	0.0368542	0.752384	0.12356
HIIE	Post exercise	RUSF1	-0.182598	15.262	-2.10449	-3.7595	0.0371926	0.752384	0.12356
HIIE	Post exercise	UBE2E1	-0.419648	12.7377	-2.10019	-3.76736	0.0375757	0.752384	0.12356
HIIE	Post exercise	UBE3A	0.12799	14.4029	2.11468	-3.74079	0.0362959	0.752384	0.12356
HIIE	Post exercise	CRLF3	0.0921176	16.8537	2.09135	-3.78345	0.0383713	0.752752	0.123348
HIIE	Post exercise	GBP5	0.271358	14.042	2.09065	-3.78474	0.0384375	0.752752	0.123348
HIIE	Post exercise	PDCD4	0.206643	17.4446	2.0896	-3.78666	0.0385338	0.752752	0.123348
HIIE	Post exercise	PITPNC1	-0.114006	14.3185	-2.09046	-3.78507	0.0384526	0.752752	0.123348
HIIE	Post exercise	POM121C	0.240384	12.6986	2.08841	-3.7888	0.038641	0.752752	0.123348
HIIE	Post exercise	ST6GAL1	-0.195343	14.8595	-2.09232	-3.78171	0.0382858	0.752752	0.123348
HIIE	Post exercise	ZDHHC3	-0.259142	14.5426	-2.09534	-3.7762	0.0380115	0.752752	0.123348
HIIE	Post exercise	LEF1	-0.297979	14.8208	-2.08395	-3.7969	0.0390528	0.755897	0.121538
HIIE	Post exercise	RASSF5	0.268462	14.6659	2.08416	-3.79653	0.0390338	0.755897	0.121538
HIIE	Post exercise	ALDH1L2	-0.255634	13.4378	-2.07624	-3.81086	0.0397715	0.756683	0.121086
HIIE	Post exercise	CTSZ	-0.271807	17.616	-2.08095	-3.80234	0.039331	0.756683	0.121086
HIIE	Post exercise	MTA3	0.330862	14.7023	2.07538	-3.81242	0.0398528	0.756683	0.121086
HIIE	Post exercise	OSBPL2	-0.145904	15.5086	-2.0745	-3.81399	0.039933	0.756683	0.121086
HIIE	Post exercise	RPP38	-0.701437	21.2956	-2.07282	-3.81703	0.0400939	0.756683	0.121086
HIIE	Post exercise	SLC25A17	-0.186204	12.7996	-2.07806	-3.80755	0.0395982	0.756683	0.121086
HIIE	Post exercise	TMEM41A	-0.20072	15.7152	-2.07903	-3.80582	0.0395101	0.756683	0.121086
HIIE	Post exercise	TRMT2A	-0.271161	12.5704	-2.07148	-3.81946	0.0402211	0.756683	0.121086
HIIE	Post exercise	USP32	-0.299787	11.6498	-2.0725	-3.81762	0.0401246	0.756683	0.121086
HIIE	Post exercise	APOOL	-0.106473	16.6376	-2.05568	-3.84782	0.0417415	0.759485	0.119481
HIIE	Post exercise	CD247	0.23997	15.7285	2.05558	-3.84801	0.0417534	0.759485	0.119481
HIIE	Post exercise	CPT2	-0.120235	17.2662	-2.0674	-3.82679	0.0406074	0.759485	0.119481
HIIE	Post exercise	GLCE	-0.198412	14.3769	-2.05963	-3.84076	0.0413587	0.759485	0.119481
HIIE	Post exercise	GNPNAT1	-0.21397	14.8537	-2.06207	-3.83639	0.0411222	0.759485	0.119481
HIIE	Post exercise	MAN1A1	-0.211888	15.3344	-2.05916	-3.84162	0.0414049	0.759485	0.119481
HIIE	Post exercise	NCF2	-0.290487	15.6841	-2.05597	-3.84732	0.0417155	0.759485	0.119481
HIIE	Post exercise	NFATC2	0.251302	15.5687	2.05998	-3.84014	0.0413247	0.759485	0.119481
HIIE	Post exercise	NFE2	-0.205114	14.8878	-2.06016	-3.83982	0.0413075	0.759485	0.119481
HIIE	Post exercise	TGFBI	-0.228843	16.2593	-2.06475	-3.83158	0.0408642	0.759485	0.119481
HIIE	Post exercise	WDFY3	-0.678934	10.9911	-2.0614	-3.83758	0.0411867	0.759485	0.119481
HIIE	Post exercise	RBL2	0.386549	13.5496	2.05398	-3.85089	0.0419113	0.760068	0.119148
HIIE	Post exercise	DIAPH2	-0.289037	12.9602	-2.05002	-3.85796	0.0423015	0.76044	0.118935
HIIE	Post exercise	IGHV3-9	-0.339417	14.7867	-2.05051	-3.85708	0.0422528	0.76044	0.118935
HIIE	Post exercise	KRAS	-0.151377	16.2135	-2.04918	-3.85946	0.042384	0.76044	0.118935
HIIE	Post exercise	RAB10	-0.13822	20.9466	-2.04865	-3.86039	0.0424356	0.76044	0.118935
HIIE	Post exercise	PDLIM2	0.351795	13.7404	2.04547	-3.86608	0.0427544	0.763887	0.116971
HIIE	Post exercise	ATP7A	-0.178874	15.4212	-2.04334	-3.86986	0.0429672	0.765424	0.116098
HIIE	Post exercise	F12	-0.26604	15.0425	-2.04123	-3.87363	0.0431801	0.766771	0.115334
HIIE	Post exercise	RRP7A	-0.42539	12.4417	-2.04007	-3.87569	0.0432967	0.766771	0.115334
HIIE	Post exercise	ACP3	-0.275238	13.609	-2.03716	-3.88086	0.0435916	0.768889	0.114136
HIIE	Post exercise	FAM169A	0.324805	14.377	2.03638	-3.88224	0.0436709	0.768889	0.114136
HIIE	Post exercise	CASP3	-0.269331	17.8905	-2.02819	-3.89675	0.0445114	0.772426	0.112143
HIIE	Post exercise	KCTD10	0.125992	13.9217	2.03269	-3.88876	0.044045	0.772426	0.112143
HIIE	Post exercise	PGM3	-0.252509	13.5365	-2.02853	-3.89614	0.0444758	0.772426	0.112143
HIIE	Post exercise	PSMD2	0.0940298	18.1495	2.0309	-3.89193	0.0442293	0.772426	0.112143
HIIE	Post exercise	TMEM245	-0.122484	15.3435	-2.02886	-3.89554	0.0444396	0.772426	0.112143
HIIE	Post exercise	ACSL4	-0.0784452	17.8963	-1.99579	-3.95358	0.0479698	0.773329	0.111636
HIIE	Post exercise	ADA2	-0.258284	16.8564	-1.98265	-3.9764	0.0494396	0.773329	0.111636
HIIE	Post exercise	ARF1	-0.107633	22.6002	-1.98476	-3.97273	0.0491991	0.773329	0.111636
HIIE	Post exercise	ARL1	-0.114696	17.2282	-1.9898	-3.96398	0.0486335	0.773329	0.111636
HIIE	Post exercise	ARPC5L	0.245151	17.3877	1.97017	-3.99794	0.050869	0.773329	0.111636
HIIE	Post exercise	ATP5ME	-0.118816	19.8511	-1.97999	-3.98098	0.0497385	0.773329	0.111636
HIIE	Post exercise	BPIFA2	-0.588293	16.3413	-1.98928	-3.96491	0.0486945	0.773329	0.111636
HIIE	Post exercise	C4BPA	0.296131	18.1745	1.95946	-4.01632	0.052123	0.773329	0.111636
HIIE	Post exercise	CARD16	0.373133	12.178	2.02443	-3.90338	0.0449014	0.773329	0.111636
HIIE	Post exercise	CKAP4	-0.251179	15.8305	-2.0043	-3.93874	0.0470415	0.773329	0.111636
HIIE	Post exercise	CLN6	0.16591	14.4478	1.97693	-3.98627	0.0500878	0.773329	0.111636
HIIE	Post exercise	CPNE3	0.21767	19.657	1.98318	-3.97549	0.0493806	0.773329	0.111636
HIIE	Post exercise	CSF2RA	-0.358754	12.929	-1.96406	-4.00843	0.051581	0.773329	0.111636
HIIE	Post exercise	D2HGDH	0.185383	13.993	1.97095	-3.9966	0.0507777	0.773329	0.111636
HIIE	Post exercise	DDB2	-0.257605	15.0958	-1.95956	-4.01615	0.0521111	0.773329	0.111636
HIIE	Post exercise	DFFB	0.311071	11.7383	1.96315	-4.00999	0.0516878	0.773329	0.111636
HIIE	Post exercise	DNAJC19	-0.200553	15.215	-1.96934	-3.99937	0.0509655	0.773329	0.111636
HIIE	Post exercise	DPM1	-0.0879769	18.2779	-2.00402	-3.93922	0.0470696	0.773329	0.111636
HIIE	Post exercise	DR1	0.294321	15.3995	1.98854	-3.9662	0.048778	0.773329	0.111636
HIIE	Post exercise	DYSF	-0.271465	15.1014	-1.9585	-4.01795	0.0522361	0.773329	0.111636
HIIE	Post exercise	EMP3	0.580622	14.048	1.98688	-3.96908	0.0489635	0.773329	0.111636
HIIE	Post exercise	EPHX1	-0.132432	16.7674	-2.0071	-3.93382	0.0467361	0.773329	0.111636
HIIE	Post exercise	FBXW11	-0.330378	13.117	-1.99922	-3.94762	0.0475961	0.773329	0.111636
HIIE	Post exercise	FGR	-0.199661	15.9176	-1.96146	-4.0129	0.0518873	0.773329	0.111636
HIIE	Post exercise	FKBP8	-0.104191	15.5635	-1.98815	-3.96685	0.0488179	0.773329	0.111636
HIIE	Post exercise	FLI1	0.241147	13.3505	1.95652	-4.02135	0.0524717	0.773329	0.111636
HIIE	Post exercise	FNTA	-0.164318	15.4734	-1.99861	-3.94869	0.0476629	0.773329	0.111636
HIIE	Post exercise	GALE	-0.275343	14.4166	-1.9907	-3.96244	0.0485362	0.773329	0.111636
HIIE	Post exercise	GALNT4	-0.152069	14.8822	-1.99953	-3.94705	0.0475588	0.773329	0.111636
HIIE	Post exercise	GET4	-0.17951	15.3509	-2.00651	-3.93488	0.0468027	0.773329	0.111636
HIIE	Post exercise	GORASP2	0.104942	15.4814	1.95632	-4.02168	0.052493	0.773329	0.111636
HIIE	Post exercise	GRAMD1A	0.262499	12.2686	2.00872	-3.93101	0.0465645	0.773329	0.111636
HIIE	Post exercise	GSTZ1	-0.177707	15.6363	-1.96934	-3.99936	0.0509647	0.773329	0.111636
HIIE	Post exercise	IST1	-0.0881359	17.4609	-2.01368	-3.92228	0.046031	0.773329	0.111636
HIIE	Post exercise	LEO1	0.282575	13.9565	1.97548	-3.98879	0.0502563	0.773329	0.111636
HIIE	Post exercise	LRRC59	-0.101574	20.5053	-1.99667	-3.95204	0.0478728	0.773329	0.111636
HIIE	Post exercise	MOSPD2	-0.0947456	15.7072	-1.95516	-4.02365	0.0526309	0.773329	0.111636
HIIE	Post exercise	MTIF3	-0.180918	14.3848	-2.01694	-3.91658	0.0456874	0.773329	0.111636
HIIE	Post exercise	ND4	-0.227468	16.6651	-1.96005	-4.01531	0.0520532	0.773329	0.111636
HIIE	Post exercise	NDRG3	0.209744	14.1815	2.00198	-3.9428	0.047294	0.773329	0.111636
HIIE	Post exercise	NLRC4	-0.225937	13.2878	-1.95971	-4.01589	0.0520935	0.773329	0.111636
HIIE	Post exercise	NPC1	0.206957	13.999	1.98972	-3.96414	0.0486453	0.773329	0.111636
HIIE	Post exercise	OSTF1	-0.219225	17.7718	-1.98191	-3.97769	0.0495238	0.773329	0.111636
HIIE	Post exercise	PHF2	0.307864	15.7344	1.98046	-3.9802	0.0496885	0.773329	0.111636
HIIE	Post exercise	PPP1R2	-0.289553	12.4843	-2.01122	-3.92663	0.0462968	0.773329	0.111636
HIIE	Post exercise	RAB6B	-0.23165	19.4219	-1.98361	-3.97474	0.0493315	0.773329	0.111636
HIIE	Post exercise	RALB	-0.154301	18.1779	-1.98415	-3.9738	0.0492702	0.773329	0.111636
HIIE	Post exercise	RNASE6	-0.298277	15.4547	-1.97368	-3.9919	0.0504636	0.773329	0.111636
HIIE	Post exercise	RNF213	0.144562	16.4888	1.99477	-3.95536	0.0480836	0.773329	0.111636
HIIE	Post exercise	RRS1	-0.266534	14.8475	-1.98869	-3.96594	0.0487607	0.773329	0.111636
HIIE	Post exercise	SCRIB	0.204064	12.2051	1.97269	-3.99359	0.0505751	0.773329	0.111636
HIIE	Post exercise	SERPINB10	-0.350727	16.3502	-2.0235	-3.90504	0.0449992	0.773329	0.111636
HIIE	Post exercise	SORT1	-0.142079	17.456	-2.0222	-3.90731	0.0451334	0.773329	0.111636
HIIE	Post exercise	STK11IP	-0.148043	13.985	-1.9623	-4.01143	0.0517845	0.773329	0.111636
HIIE	Post exercise	STT3B	-0.133303	18.9553	-1.9676	-4.00234	0.0511651	0.773329	0.111636
HIIE	Post exercise	SYVN1	-0.165329	14.7179	-1.97932	-3.98216	0.0498169	0.773329	0.111636
HIIE	Post exercise	TELO2	0.289668	11.4996	1.98955	-3.96445	0.0486652	0.773329	0.111636
HIIE	Post exercise	TOMM40	-0.249917	16.2065	-1.97132	-3.99595	0.0507353	0.773329	0.111636
HIIE	Post exercise	UTP14A	-0.291277	12.8296	-2.00014	-3.94601	0.0474947	0.773329	0.111636
HIIE	Post exercise	XYLT2	-0.195014	16.2966	-1.99533	-3.95439	0.0480228	0.773329	0.111636
HIIE	Post exercise	ZC3H18	0.360103	13.1052	1.95787	-4.01905	0.0523118	0.773329	0.111636
HIIE	Post exercise	ZFP91	-0.346774	13.987	-1.97714	-3.98593	0.0500666	0.773329	0.111636
HIIE	Post exercise	ZNF316	0.292066	11.7127	1.95588	-4.02244	0.0525481	0.773329	0.111636
HIIE	Post exercise	LRCH3	0.110849	15.7422	1.95407	-4.02551	0.0527607	0.773354	0.111622
HIIE	Post exercise	ELOB	0.120657	17.2617	1.9516	-4.02972	0.0530563	0.77393	0.111298
HIIE	Post exercise	RASAL3	0.209154	16.4292	1.95178	-4.02945	0.0530385	0.77393	0.111298
HIIE	Post exercise	ALDH3A2	-0.1311	16.8662	-1.94248	-4.04525	0.0541618	0.776769	0.109708
HIIE	Post exercise	APOBEC3G	0.233277	16.0947	1.94582	-4.03959	0.0537578	0.776769	0.109708
HIIE	Post exercise	CRAT	-0.103664	17.4637	-1.9437	-4.04317	0.0540127	0.776769	0.109708
HIIE	Post exercise	GNB4	-0.384614	17.2192	-1.94154	-4.04687	0.0542799	0.776769	0.109708
HIIE	Post exercise	HSD17B11	-0.109313	16.7856	-1.94803	-4.03581	0.053487	0.776769	0.109708
HIIE	Post exercise	OVCA2	0.220926	15.7806	1.94295	-4.04447	0.0541072	0.776769	0.109708
HIIE	Post exercise	RIPK2	0.201091	13.1753	1.94168	-4.0466	0.0542601	0.776769	0.109708
HIIE	Post exercise	SELENOO	0.160558	13.1325	1.94305	-4.04427	0.0540915	0.776769	0.109708
HIIE	Post exercise	ATE1	-0.106007	16.8351	-1.93105	-4.06459	0.0555733	0.777269	0.109429
HIIE	Post exercise	B2M	0.169422	19.9534	1.92049	-4.0824	0.0569089	0.777269	0.109429
HIIE	Post exercise	BIN1	0.210126	15.2152	1.93159	-4.0637	0.0555088	0.777269	0.109429
HIIE	Post exercise	BST2	0.408584	14.8597	1.91509	-4.09145	0.0575997	0.777269	0.109429
HIIE	Post exercise	COCH	-0.239723	14.3577	-1.91361	-4.09393	0.05779	0.777269	0.109429
HIIE	Post exercise	CYB5B	0.139858	17.0063	1.91637	-4.08929	0.0574333	0.777269	0.109429
HIIE	Post exercise	DLG1	-0.0885665	15.223	-1.927	-4.07143	0.0560811	0.777269	0.109429
HIIE	Post exercise	HEXA	-0.165887	17.5841	-1.91388	-4.09348	0.0577553	0.777269	0.109429
HIIE	Post exercise	HIF1AN	0.111758	14.5489	1.9344	-4.05893	0.0551564	0.777269	0.109429
HIIE	Post exercise	HINT3	-0.175177	15.2863	-1.91509	-4.09146	0.0576004	0.777269	0.109429
HIIE	Post exercise	ITCH	0.0845997	14.7623	1.91511	-4.09141	0.0575944	0.777269	0.109429
HIIE	Post exercise	ITIH4	-0.187264	17.5328	-1.93358	-4.06034	0.0552612	0.777269	0.109429
HIIE	Post exercise	LTF	0.683315	21.2056	1.9222	-4.07952	0.0566904	0.777269	0.109429
HIIE	Post exercise	MTFP1	-0.22065	14.7394	-1.92391	-4.07664	0.0564736	0.777269	0.109429
HIIE	Post exercise	MYOF	-0.289851	14.4587	-1.9288	-4.06841	0.0558582	0.777269	0.109429
HIIE	Post exercise	PARN	0.225591	16.6168	1.91723	-4.08786	0.0573245	0.777269	0.109429
HIIE	Post exercise	PDGFA	-0.225382	18.1779	-1.91371	-4.09376	0.0577773	0.777269	0.109429
HIIE	Post exercise	PLD4	-0.340479	14.7551	-1.91563	-4.09056	0.057531	0.777269	0.109429
HIIE	Post exercise	RAB18	-0.107551	17.8576	-1.92504	-4.07473	0.0563287	0.777269	0.109429
HIIE	Post exercise	SHARPIN	0.247984	13.0681	1.9229	-4.07835	0.0566025	0.777269	0.109429
HIIE	Post exercise	SPN	0.25996	16.1759	1.92294	-4.07828	0.0565971	0.777269	0.109429
HIIE	Post exercise	TBC1D10A	0.223278	13.2794	1.91572	-4.09041	0.0575194	0.777269	0.109429
HIIE	Post exercise	TPRG1L	-0.181163	13.7184	-1.92638	-4.07247	0.0561592	0.777269	0.109429
HIIE	Post exercise	TREML2	0.236635	15.1617	1.92486	-4.07505	0.0563541	0.777269	0.109429
HIIE	Post exercise	VPS33A	0.0739596	16.0741	1.92506	-4.0747	0.0563261	0.777269	0.109429
HIIE	Post exercise	VPS4B	0.0909601	18.8508	1.92086	-4.08176	0.0568581	0.777269	0.109429
HIIE	Post exercise	ZMYM3	0.302425	12.8644	1.92266	-4.07875	0.0566324	0.777269	0.109429
HIIE	Post exercise	SYNE1	0.156113	15.6312	1.90695	-4.10506	0.0586551	0.785406	0.104906
HIIE	Post exercise	THEM4	-0.221919	15.0304	-1.90766	-4.10388	0.058563	0.785406	0.104906
HIIE	Post exercise	MTIF2	-0.141174	15.0571	-1.90544	-4.10756	0.0588495	0.786266	0.104431
HIIE	Post exercise	MICU1	-0.114964	16.3663	-1.90343	-4.11091	0.0591137	0.786317	0.104402
HIIE	Post exercise	TM9SF4	-0.0794946	17.9778	-1.90385	-4.11021	0.059058	0.786317	0.104402
HIIE	Post exercise	ANGPT1	-0.215285	16.7784	-1.89839	-4.11931	0.0597825	0.788422	0.103241
HIIE	Post exercise	CYBC1	-0.122898	15.513	-1.89985	-4.11688	0.0595867	0.788422	0.103241
HIIE	Post exercise	FXR2	0.143383	14.1226	1.89823	-4.11956	0.0598006	0.788422	0.103241
HIIE	Post exercise	GAA	-0.242595	15.825	-1.89916	-4.11803	0.0596805	0.788422	0.103241
HIIE	Post exercise	HDDC3	0.183753	14.0543	1.89732	-4.12109	0.0599248	0.788422	0.103241
HIIE	Post exercise	GBP2	0.180969	15.5201	1.89484	-4.12522	0.0602564	0.790919	0.101868
HIIE	Post exercise	SCCPDH	-0.107353	19.447	-1.89391	-4.12673	0.0603765	0.790919	0.101868
HIIE	Post exercise	ABHD6	0.260473	11.6926	1.89082	-4.13186	0.0607945	0.794053	0.10015
HIIE	Post exercise	FUBP3	0.173736	15.0568	1.88535	-4.1409	0.0615348	0.794053	0.10015
HIIE	Post exercise	PCYOX1L	-0.161739	18.4657	-1.888	-4.13653	0.0611758	0.794053	0.10015
HIIE	Post exercise	PIK3R4	0.0909972	15.3914	1.88532	-4.14094	0.0615362	0.794053	0.10015
HIIE	Post exercise	PIN4	-0.212443	16.3093	-1.88602	-4.1398	0.0614444	0.794053	0.10015
HIIE	Post exercise	RPIA	-0.204783	16.5753	-1.88546	-4.14073	0.0615207	0.794053	0.10015
HIIE	Post exercise	VPS18	0.0644703	16.9127	1.88847	-4.13574	0.0611092	0.794053	0.10015
HIIE	Post exercise	COG6	0.142315	14.3894	1.88381	-4.14343	0.0617415	0.795004	0.0996306
HIIE	Post exercise	ANXA7	0.368968	19.4411	1.87887	-4.15159	0.062422	0.797734	0.0981418
HIIE	Post exercise	ARL8B	-0.312251	19.0723	-1.87558	-4.157	0.062877	0.797734	0.0981418
HIIE	Post exercise	ASPH	-0.125339	16.8167	-1.86879	-4.16812	0.0638204	0.797734	0.0981418
HIIE	Post exercise	ATP5PB	-0.0778032	19.9297	-1.88075	-4.14847	0.0621601	0.797734	0.0981418
HIIE	Post exercise	BLOC1S3	0.180973	13.8788	1.86889	-4.16797	0.0638079	0.797734	0.0981418
HIIE	Post exercise	C1D	-0.268424	11.5112	-1.87184	-4.16314	0.0633967	0.797734	0.0981418
HIIE	Post exercise	DCTN6	0.145836	16.2996	1.86611	-4.17251	0.0641992	0.797734	0.0981418
HIIE	Post exercise	EMC2	-0.102203	16.9127	-1.87077	-4.16487	0.0635423	0.797734	0.0981418
HIIE	Post exercise	KBTBD11	-0.27448	14.2102	-1.8707	-4.165	0.0635548	0.797734	0.0981418
HIIE	Post exercise	PCBD2	-0.349443	14.271	-1.86787	-4.16964	0.0639521	0.797734	0.0981418
HIIE	Post exercise	PFDN5	0.150505	14.4983	1.87435	-4.159	0.063044	0.797734	0.0981418
HIIE	Post exercise	SNX3	-0.0909357	19.1991	-1.87248	-4.16206	0.0633036	0.797734	0.0981418
HIIE	Post exercise	STK26	0.193073	16.4689	1.87706	-4.15456	0.0626717	0.797734	0.0981418
HIIE	Post exercise	TMC8	0.192486	14.0778	1.87299	-4.16125	0.0632359	0.797734	0.0981418
HIIE	Post exercise	TMEM209	0.367606	12.7328	1.87265	-4.16181	0.0632839	0.797734	0.0981418
HIIE	Post exercise	UXT	-0.179989	14.403	-1.87467	-4.15849	0.0630024	0.797734	0.0981418
HIIE	Post exercise	ZFYVE16	-0.26263	12.8896	-1.86665	-4.17162	0.0641229	0.797734	0.0981418
HIIE	Post exercise	CD33	-0.372739	13.8816	-1.86454	-4.17507	0.0644205	0.798467	0.0977429
HIIE	Post exercise	STAT4	0.266773	13.3417	1.86382	-4.17625	0.0645226	0.798467	0.0977429
HIIE	Post exercise	ALDH3B1	-0.25381	15.388	-1.86258	-4.17828	0.0646985	0.799006	0.0974499
HIIE	Post exercise	BCS1L	-0.094275	15.0619	-1.85661	-4.18799	0.0655466	0.799669	0.0970898
HIIE	Post exercise	CPTP	-0.311261	10.8018	-1.86004	-4.18242	0.0650595	0.799669	0.0970898
HIIE	Post exercise	CYC1	0.125132	17.704	1.861	-4.18085	0.0649211	0.799669	0.0970898
HIIE	Post exercise	INTS2	-0.224014	14.7505	-1.85689	-4.18755	0.0655101	0.799669	0.0970898
HIIE	Post exercise	MBOAT7	-0.189	15.7631	-1.85883	-4.18439	0.065232	0.799669	0.0970898
HIIE	Post exercise	MT1X	-0.256711	14.0122	-1.85811	-4.18556	0.065335	0.799669	0.0970898
HIIE	Post exercise	MASP1	-0.249011	13.3481	-1.85492	-4.19076	0.065793	0.801057	0.0963366
HIIE	Post exercise	SMC4	-0.188708	13.9813	-1.85343	-4.19318	0.0660076	0.802052	0.0957976
HIIE	Post exercise	SORD	-0.0930663	17.0947	-1.85214	-4.19526	0.0661913	0.802669	0.0954636
HIIE	Post exercise	TIMM23	-0.207069	15.5294	-1.85099	-4.19714	0.0663603	0.803106	0.095227
HIIE	Post exercise	KYNU	-0.32419	14.1477	-1.84872	-4.20082	0.0666898	0.804626	0.0944062
HIIE	Post exercise	PURA	0.0747799	17.7975	1.84806	-4.20187	0.0667828	0.804626	0.0944062
HIIE	Post exercise	QRSL1	-0.174953	12.9341	-1.84735	-4.20302	0.0668856	0.804626	0.0944062
HIIE	Post exercise	CHMP3	-0.165491	16.1779	-1.84445	-4.20773	0.0673131	0.804959	0.0942265
HIIE	Post exercise	FCGR3A	0.415897	14.8599	1.84584	-4.20548	0.0671095	0.804959	0.0942265
HIIE	Post exercise	IKZF3	0.277399	14.4184	1.84501	-4.20682	0.0672306	0.804959	0.0942265
HIIE	Post exercise	IPO11	0.198764	11.7675	1.84314	-4.20983	0.0675025	0.805627	0.0938659
HIIE	Post exercise	AGPAT3	-0.121026	16.0082	-1.84067	-4.21381	0.0678657	0.807405	0.0929084
HIIE	Post exercise	RPSA	0.211513	19.9463	1.84034	-4.21437	0.0679189	0.807405	0.0929084
HIIE	Post exercise	ZC3H12C	0.194417	14.3942	1.83803	-4.21809	0.0682599	0.809866	0.091587
HIIE	Post exercise	BSCL2	-0.178461	14.9201	-1.83269	-4.22669	0.0690561	0.811211	0.0908663
HIIE	Post exercise	CYRIB	0.136693	16.5358	1.83412	-4.22439	0.0688414	0.811211	0.0908663
HIIE	Post exercise	FLOT2	0.255303	17.4735	1.83187	-4.22801	0.0691793	0.811211	0.0908663
HIIE	Post exercise	GATD1	0.167878	16.3654	1.83481	-4.22328	0.068739	0.811211	0.0908663
HIIE	Post exercise	RBKS	-0.245381	16.5836	-1.83251	-4.22697	0.0690822	0.811211	0.0908663
HIIE	Post exercise	USP8	-0.123651	13.0786	-1.83607	-4.22123	0.0685479	0.811211	0.0908663
HIIE	Post exercise	PRKCA	-0.122257	17.1075	-1.82787	-4.23441	0.0697784	0.81193	0.0904816
HIIE	Post exercise	REEP4	-0.205631	14.8573	-1.82857	-4.23329	0.0696748	0.81193	0.0904816
HIIE	Post exercise	SIAE	-0.170314	16.1384	-1.82812	-4.23402	0.069743	0.81193	0.0904816
HIIE	Post exercise	TIMMDC1	-0.271918	11.603	-1.82875	-4.233	0.0696474	0.81193	0.0904816
HIIE	Post exercise	GAMT	-0.295705	14.3707	-1.82648	-4.23665	0.0699911	0.812839	0.0899957
HIIE	Post exercise	ACAA2	0.180399	18.7475	1.82056	-4.24611	0.0708921	0.813911	0.0894229
HIIE	Post exercise	C17orf49	0.206784	16.0051	1.82332	-4.24171	0.0704712	0.813911	0.0894229
HIIE	Post exercise	GGPS1	0.150064	14.4988	1.82327	-4.24177	0.0704758	0.813911	0.0894229
HIIE	Post exercise	MSRA	-0.0981525	16.7442	-1.82115	-4.24516	0.0707986	0.813911	0.0894229
HIIE	Post exercise	PLA2G12A	0.356972	13.3311	1.82278	-4.24257	0.070553	0.813911	0.0894229
HIIE	Post exercise	SPTLC1	-0.0739805	16.1197	-1.82059	-4.24605	0.0708842	0.813911	0.0894229
HIIE	Post exercise	SAP30BP	0.271103	14.1351	1.81889	-4.24879	0.0711491	0.815312	0.0886761
HIIE	Post exercise	ALDH4A1	-0.130145	17.3155	-1.81471	-4.25545	0.0717915	0.818749	0.0868493
HIIE	Post exercise	DNAJB11	-0.110677	18.1001	-1.81306	-4.25806	0.0720448	0.818749	0.0868493
HIIE	Post exercise	MRPL40	-0.173302	14.7929	-1.81255	-4.25888	0.0721269	0.818749	0.0868493
HIIE	Post exercise	RCOR1	0.24347	13.5633	1.81443	-4.2559	0.0718366	0.818749	0.0868493
HIIE	Post exercise	TRAPPC2	-0.106478	14.1926	-1.81318	-4.25786	0.0720256	0.818749	0.0868493
HIIE	Post exercise	STEAP4	0.41619	13.4591	1.80991	-4.26308	0.0725385	0.821876	0.0851938
HIIE	Post exercise	CARD9	-0.145188	13.9369	-1.80265	-4.27457	0.0736745	0.826902	0.0825461
HIIE	Post exercise	ELOVL5	0.234759	14.5387	1.80099	-4.27721	0.0739405	0.826902	0.0825461
HIIE	Post exercise	OSCAR	-0.32637	12.9128	-1.80256	-4.27473	0.0736921	0.826902	0.0825461
HIIE	Post exercise	PELO	-0.0974456	12.8841	-1.80337	-4.27343	0.073561	0.826902	0.0825461
HIIE	Post exercise	PLCB2	-0.0890363	17.4316	-1.80244	-4.27491	0.0737081	0.826902	0.0825461
HIIE	Post exercise	PLD3	-0.223995	17.3297	-1.8016	-4.27624	0.0738436	0.826902	0.0825461
HIIE	Post exercise	SEPTIN9	0.128039	19.679	1.80215	-4.27537	0.0737556	0.826902	0.0825461
HIIE	Post exercise	AGTRAP	-0.219261	15.2354	-1.79896	-4.28041	0.0742624	0.827835	0.082056
HIIE	Post exercise	SEPTIN1	0.23268	17.0415	1.79874	-4.28077	0.0742982	0.827835	0.082056
HIIE	Post exercise	RAB38	-0.171088	18.6687	-1.79716	-4.28325	0.0745489	0.829099	0.0813934
HIIE	Post exercise	RAB35	-0.108731	16.0961	-1.79343	-4.28913	0.075144	0.834182	0.0787393
HIIE	Post exercise	ANKRD27	0.161577	14.0804	1.79088	-4.29314	0.0755544	0.834677	0.0784814
HIIE	Post exercise	MRPL22	-0.169613	15.404	-1.79066	-4.2935	0.0755935	0.834677	0.0784814
HIIE	Post exercise	PTK2B	0.087345	16.6825	1.79057	-4.29362	0.0756033	0.834677	0.0784814
HIIE	Post exercise	NUDT9	-0.158571	13.9477	-1.78547	-4.30164	0.0764319	0.842285	0.0745411
HIIE	Post exercise	C3	-0.162779	19.7891	-1.7815	-4.30786	0.0770831	0.842954	0.0741962
HIIE	Post exercise	EIF3K	0.156425	16.9606	1.78111	-4.30847	0.0771472	0.842954	0.0741962
HIIE	Post exercise	EWSR1	-0.260094	18.2772	-1.78085	-4.30888	0.0771905	0.842954	0.0741962
HIIE	Post exercise	MLEC	-0.111726	19.5399	-1.78229	-4.30661	0.07695	0.842954	0.0741962
HIIE	Post exercise	MPO	-0.308772	21.8933	-1.78172	-4.30751	0.0770464	0.842954	0.0741962
HIIE	Post exercise	ACTR2	0.129084	20.2797	1.76769	-4.32938	0.0793747	0.844195	0.0735572
HIIE	Post exercise	AP1G1	-0.0774192	19.3463	-1.76676	-4.33082	0.0795289	0.844195	0.0735572
HIIE	Post exercise	BANP	-0.30726	13.7501	-1.75716	-4.3457	0.0811621	0.844195	0.0735572
HIIE	Post exercise	DENND1C	0.221436	14.5579	1.77552	-4.31721	0.0780699	0.844195	0.0735572
HIIE	Post exercise	DNASE2	0.186051	15.5593	1.75787	-4.3446	0.0810401	0.844195	0.0735572
HIIE	Post exercise	FAM210B	-0.189012	12.9381	-1.76086	-4.33996	0.0805278	0.844195	0.0735572
HIIE	Post exercise	GATAD2A	0.227989	13.4988	1.76886	-4.32758	0.0791802	0.844195	0.0735572
HIIE	Post exercise	GNG10	0.273257	14.9355	1.75683	-4.34621	0.0812183	0.844195	0.0735572
HIIE	Post exercise	HIP1R	0.285824	12.9534	1.77731	-4.31441	0.077773	0.844195	0.0735572
HIIE	Post exercise	LPCAT3	-0.132699	17.6446	-1.76486	-4.33377	0.0798519	0.844195	0.0735572
HIIE	Post exercise	LYZ	-0.30197	22.4346	-1.76215	-4.33798	0.080311	0.844195	0.0735572
HIIE	Post exercise	MOCS2	-0.321156	12.4269	-1.75798	-4.34443	0.0810214	0.844195	0.0735572
HIIE	Post exercise	OTUD6B	-0.152246	14.8715	-1.76774	-4.32931	0.0793671	0.844195	0.0735572
HIIE	Post exercise	P2RY12	-0.14681	15.7516	-1.77672	-4.31533	0.0778707	0.844195	0.0735572
HIIE	Post exercise	PEX6	0.222053	11.828	1.77184	-4.32293	0.0786789	0.844195	0.0735572
HIIE	Post exercise	PRPS1	0.120413	16.9073	1.75845	-4.3437	0.0809387	0.844195	0.0735572
HIIE	Post exercise	PYHIN1	0.261533	14.4715	1.75695	-4.34602	0.0811981	0.844195	0.0735572
HIIE	Post exercise	RAB2A	-0.0930823	19.4864	-1.77421	-4.31923	0.0782831	0.844195	0.0735572
HIIE	Post exercise	SERPINA3	-0.243963	15.453	-1.76871	-4.32781	0.0792052	0.844195	0.0735572
HIIE	Post exercise	SOAT1	-0.269024	14.3696	-1.75816	-4.34414	0.0809897	0.844195	0.0735572
HIIE	Post exercise	SPAG7	-0.239921	14.6875	-1.76339	-4.33605	0.0801004	0.844195	0.0735572
HIIE	Post exercise	SSU72	0.300028	14.0263	1.76999	-4.32582	0.0789906	0.844195	0.0735572
HIIE	Post exercise	TACC2	-0.14037	19.7797	-1.77182	-4.32296	0.0786838	0.844195	0.0735572
HIIE	Post exercise	TMEM222	-0.344895	15.1392	-1.77551	-4.31722	0.0780711	0.844195	0.0735572
HIIE	Post exercise	TOLLIP	-0.115715	17.2536	-1.7584	-4.34377	0.0809467	0.844195	0.0735572
HIIE	Post exercise	USE1	-0.213084	13.8483	-1.77757	-4.314	0.0777298	0.844195	0.0735572
HIIE	Post exercise	VTN	-0.154502	19.3021	-1.7573	-4.34547	0.0811371	0.844195	0.0735572
HIIE	Post exercise	ZYG11B	0.14402	11.9024	1.76787	-4.32909	0.0793416	0.844195	0.0735572
HIIE	Post exercise	MESD	-0.1442	18.4157	-1.75509	-4.34888	0.0815159	0.845832	0.0727157
HIIE	Post exercise	LAS1L	-0.213251	15.1241	-1.75305	-4.35204	0.0818677	0.846573	0.0723355
HIIE	Post exercise	RAD1	-0.254537	12.5952	-1.7538	-4.35087	0.0817375	0.846573	0.0723355
HIIE	Post exercise	CLN8	-0.253115	13.5828	-1.74953	-4.35745	0.0824756	0.85018	0.0704889
HIIE	Post exercise	PGD	-0.0873584	21.3305	-1.74938	-4.35767	0.082498	0.85018	0.0704889
HIIE	Post exercise	HADH	-0.108895	20.4895	-1.74752	-4.36053	0.0828218	0.852063	0.0695283
HIIE	Post exercise	MTR	0.400469	11.6393	1.74594	-4.36297	0.0831006	0.853477	0.0688079
HIIE	Post exercise	MAP3K2	-0.380514	15.4551	-1.74462	-4.365	0.0833317	0.854397	0.0683402
HIIE	Post exercise	DCUN1D1	-0.106598	15.0693	-1.74355	-4.36663	0.0835151	0.854826	0.0681221
HIIE	Post exercise	COMT	0.204033	17.4786	1.73853	-4.37432	0.0844017	0.858821	0.0660976
HIIE	Post exercise	COMTD1	0.193038	15.0336	1.73877	-4.37395	0.084359	0.858821	0.0660976
HIIE	Post exercise	MRPL11	-0.145757	15.5307	-1.73812	-4.37495	0.0844742	0.858821	0.0660976
HIIE	Post exercise	RALA	-0.11818	16.0825	-1.74015	-4.37183	0.0841129	0.858821	0.0660976
HIIE	Post exercise	ARHGAP25	0.187878	14.7671	1.73626	-4.37778	0.0848025	0.860709	0.0651434
HIIE	Post exercise	HNRNPH2	-0.309637	16.5409	-1.73506	-4.37962	0.085017	0.861439	0.0647754
HIIE	Post exercise	CA1	-0.416451	14.176	-1.73202	-4.38425	0.0855577	0.862576	0.0642026
HIIE	Post exercise	HSP90AB4P	-0.265914	16.8782	-1.73328	-4.38233	0.0853326	0.862576	0.0642026
HIIE	Post exercise	TXNIP	0.232027	14.235	1.7321	-4.38413	0.0855435	0.862576	0.0642026
HIIE	Post exercise	UTP23	-0.242493	13.5534	-1.72978	-4.38765	0.0859583	0.864171	0.0634004
HIIE	Post exercise	VPS54	-0.15691	13.8047	-1.72952	-4.38804	0.0860021	0.864171	0.0634004
HIIE	Post exercise	ABI3	0.275212	13.6606	1.72544	-4.39426	0.0867405	0.865884	0.0625404
HIIE	Post exercise	ARAP2	0.241088	11.8636	1.71637	-4.40798	0.0883913	0.865884	0.0625404
HIIE	Post exercise	CERS6	-0.146341	11.4975	-1.71059	-4.41669	0.0894542	0.865884	0.0625404
HIIE	Post exercise	DUSP12	0.175972	15.2652	1.72092	-4.4011	0.0875599	0.865884	0.0625404
HIIE	Post exercise	EIF5B	0.126371	16.5657	1.72228	-4.39905	0.0873122	0.865884	0.0625404
HIIE	Post exercise	GCSAML	0.238534	12.9104	1.7118	-4.41487	0.0892334	0.865884	0.0625404
HIIE	Post exercise	IRAK3	-0.128818	14.1344	-1.72532	-4.39443	0.0867592	0.865884	0.0625404
HIIE	Post exercise	KDELR1	-0.20429	14.5696	-1.72668	-4.39238	0.086517	0.865884	0.0625404
HIIE	Post exercise	MBD3	0.237843	11.9121	1.71878	-4.40434	0.0879506	0.865884	0.0625404
HIIE	Post exercise	MGME1	-0.188597	12.4861	-1.71876	-4.40437	0.0879516	0.865884	0.0625404
HIIE	Post exercise	MPC2	-0.109992	16.3532	-1.71102	-4.41605	0.0893756	0.865884	0.0625404
HIIE	Post exercise	MRPL51	-0.217693	13.4679	-1.71339	-4.41248	0.0889406	0.865884	0.0625404
HIIE	Post exercise	MRPS18B	0.232719	14.5404	1.71589	-4.40872	0.0884809	0.865884	0.0625404
HIIE	Post exercise	NUDT3	-0.118585	16.5903	-1.72085	-4.40121	0.0875706	0.865884	0.0625404
HIIE	Post exercise	PHF23	0.245705	13.4656	1.71058	-4.41672	0.0894602	0.865884	0.0625404
HIIE	Post exercise	PSMD5	0.150098	17.3452	1.71428	-4.41114	0.0887763	0.865884	0.0625404
HIIE	Post exercise	RANGAP1	0.17612	15.8921	1.71247	-4.41387	0.0891107	0.865884	0.0625404
HIIE	Post exercise	SNAPIN	0.149635	16.1168	1.71232	-4.41409	0.0891372	0.865884	0.0625404
HIIE	Post exercise	TESC	0.185357	15.4815	1.71123	-4.41573	0.0893388	0.865884	0.0625404
HIIE	Post exercise	TIMM17B	-0.258227	13.6685	-1.71052	-4.4168	0.0894704	0.865884	0.0625404
HIIE	Post exercise	TMED8	-0.139246	16.1082	-1.71649	-4.4078	0.0883698	0.865884	0.0625404
HIIE	Post exercise	WASH2P	-0.105902	15.7247	-1.7109	-4.41623	0.0893976	0.865884	0.0625404
HIIE	Post exercise	WRAP73	0.231937	13.7965	1.72115	-4.40076	0.0875182	0.865884	0.0625404
HIIE	Post exercise	BRD2	0.284226	14.0311	1.70652	-4.42282	0.090215	0.871693	0.0596362
HIIE	Post exercise	RUNX1	0.250547	12.94	1.70224	-4.42925	0.0910168	0.878036	0.0564876
HIIE	Post exercise	ALDH1A1	-0.115134	16.8935	-1.69241	-4.44392	0.0928764	0.879231	0.055897
HIIE	Post exercise	CAPG	-0.213516	18.6553	-1.69443	-4.44091	0.0924933	0.879231	0.055897
HIIE	Post exercise	CARMIL2	0.182098	13.4948	1.69466	-4.44057	0.0924493	0.879231	0.055897
HIIE	Post exercise	COMMD6	-0.248166	14.2906	-1.69177	-4.44488	0.0930016	0.879231	0.055897
HIIE	Post exercise	DLG4	-0.230981	12.9903	-1.69515	-4.43984	0.0923567	0.879231	0.055897
HIIE	Post exercise	DOCK11	0.0680186	17.212	1.69657	-4.43771	0.0920831	0.879231	0.055897
HIIE	Post exercise	GNPAT	-0.0967004	15.2401	-1.69158	-4.44515	0.0930334	0.879231	0.055897
HIIE	Post exercise	LPCAT2	-0.194275	14.717	-1.69183	-4.44479	0.0929899	0.879231	0.055897
HIIE	Post exercise	MYCBP	0.20712	16.2585	1.69733	-4.43658	0.0919418	0.879231	0.055897
HIIE	Post exercise	PCSK6	-0.206554	17.8718	-1.692	-4.44453	0.0929562	0.879231	0.055897
HIIE	Post exercise	POLR1F	0.219037	12.9139	1.6926	-4.44365	0.0928432	0.879231	0.055897
HIIE	Post exercise	SSBP1	-0.133812	19.3982	-1.69635	-4.43805	0.092128	0.879231	0.055897
HIIE	Post exercise	TUBGCP6	0.246515	11.9212	1.6955	-4.43931	0.0922891	0.879231	0.055897
HIIE	Post exercise	GNA15	-0.115141	13.568	-1.68992	-4.44762	0.0933516	0.880642	0.0552006
HIIE	Post exercise	MCM5	-0.213665	15.4115	-1.6893	-4.44856	0.0934743	0.880642	0.0552006
HIIE	Post exercise	INTS1	0.188752	13.6357	1.68804	-4.45043	0.0937167	0.88155	0.054753
HIIE	Post exercise	NDUFB5	-0.170698	14.4676	-1.68682	-4.45224	0.0939513	0.882382	0.0543431
HIIE	Post exercise	ANXA4	0.375497	17.9524	1.68583	-4.4537	0.0941416	0.882797	0.0541391
HIIE	Post exercise	ATP2A1	-0.281721	14.7218	-1.68155	-4.46005	0.0949713	0.883176	0.0539526
HIIE	Post exercise	CAMK2D	0.0830044	17.2866	1.67968	-4.46282	0.0953332	0.883176	0.0539526
HIIE	Post exercise	CBFB	0.141366	16.4941	1.67363	-4.47175	0.096522	0.883176	0.0539526
HIIE	Post exercise	CFAP410	-0.162677	12.9763	-1.67492	-4.46985	0.096266	0.883176	0.0539526
HIIE	Post exercise	CNOT11	0.199118	12.8252	1.67992	-4.46247	0.0952902	0.883176	0.0539526
HIIE	Post exercise	DBI	-0.401221	15.7189	-1.67503	-4.4697	0.096248	0.883176	0.0539526
HIIE	Post exercise	EPHX2	-0.176445	17.2914	-1.6779	-4.46546	0.0956851	0.883176	0.0539526
HIIE	Post exercise	GALNT7	-0.162315	14.4002	-1.6783	-4.46487	0.0956063	0.883176	0.0539526
HIIE	Post exercise	GPR108	-0.101618	15.9752	-1.6737	-4.47165	0.0965064	0.883176	0.0539526
HIIE	Post exercise	HMGCL	-0.084225	17.1461	-1.67619	-4.46797	0.0960154	0.883176	0.0539526
HIIE	Post exercise	PTRH2	-0.104217	15.3104	-1.68168	-4.45985	0.0949432	0.883176	0.0539526
HIIE	Post exercise	PUS10	-0.465426	10.6527	-1.67659	-4.46738	0.0959401	0.883176	0.0539526
HIIE	Post exercise	SIPA1	0.17492	16.1769	1.67779	-4.46561	0.0957053	0.883176	0.0539526
HIIE	Post exercise	UBR2	0.0926721	13.7044	1.6791	-4.46368	0.0954464	0.883176	0.0539526
HIIE	Post exercise	UVRAG	0.174928	14.2341	1.67929	-4.4634	0.0954127	0.883176	0.0539526
HIIE	Post exercise	YIPF4	-0.228586	14.4014	-1.6821	-4.45924	0.0948647	0.883176	0.0539526
HIIE	Post exercise	ASCC2	0.161525	13.9766	1.67043	-4.47647	0.0971541	0.883605	0.0537418
HIIE	Post exercise	ATPAF1	-0.137175	12.8268	-1.67188	-4.47432	0.0968641	0.883605	0.0537418
HIIE	Post exercise	CDKN1A	0.237658	13.7636	1.67109	-4.4755	0.0970242	0.883605	0.0537418
HIIE	Post exercise	GET3	0.0952639	18.4677	1.67221	-4.47385	0.0968	0.883605	0.0537418
HIIE	Post exercise	BCAP31	-0.100388	19.243	-1.66937	-4.47802	0.0973614	0.884158	0.05347
HIIE	Post exercise	RIOK3	-0.180362	14.5427	-1.66852	-4.47928	0.0975337	0.884393	0.0533547
HIIE	Post exercise	ANO10	-0.119587	17.1712	-1.6417	-4.51839	0.102982	0.88465	0.0532287
HIIE	Post exercise	ATRN	-0.243288	13.0474	-1.64314	-4.51632	0.102685	0.88465	0.0532287
HIIE	Post exercise	CD300A	0.307144	13.7296	1.66652	-4.48223	0.0979333	0.88465	0.0532287
HIIE	Post exercise	CDIPT	-0.193588	17.8425	-1.65016	-4.50612	0.101238	0.88465	0.0532287
HIIE	Post exercise	F5	-0.154009	21.1341	-1.64968	-4.50683	0.101338	0.88465	0.0532287
HIIE	Post exercise	FGGY	-0.261999	11.9086	-1.64966	-4.50686	0.101342	0.88465	0.0532287
HIIE	Post exercise	FPR1	-0.216721	14.9094	-1.64653	-4.5114	0.101985	0.88465	0.0532287
HIIE	Post exercise	GLRX	0.18823	15.8521	1.65575	-4.49798	0.100099	0.88465	0.0532287
HIIE	Post exercise	GPAT3	-0.241203	12.9316	-1.64819	-4.50898	0.101643	0.88465	0.0532287
HIIE	Post exercise	IRF4	0.218767	12.4516	1.64651	-4.51143	0.101989	0.88465	0.0532287
HIIE	Post exercise	NDUFA11	-0.172525	15.5441	-1.65002	-4.50632	0.101267	0.88465	0.0532287
HIIE	Post exercise	NEU1	-0.254834	14.3081	-1.64542	-4.51301	0.102213	0.88465	0.0532287
HIIE	Post exercise	NUP37	-0.179932	15.327	-1.65971	-4.4922	0.0992989	0.88465	0.0532287
HIIE	Post exercise	PCNA	0.21447	15.9343	1.66308	-4.48727	0.098621	0.88465	0.0532287
HIIE	Post exercise	PGLS	0.207231	18.6697	1.64447	-4.51439	0.10241	0.88465	0.0532287
HIIE	Post exercise	PPP2R1A	0.175462	16.7902	1.66037	-4.49123	0.0991645	0.88465	0.0532287
HIIE	Post exercise	RAB1B	-0.111646	21.9259	-1.65611	-4.49745	0.100022	0.88465	0.0532287
HIIE	Post exercise	RELN	-0.189199	15.0463	-1.64779	-4.50958	0.101726	0.88465	0.0532287
HIIE	Post exercise	RPE	0.172944	16.4728	1.6637	-4.48635	0.0984953	0.88465	0.0532287
HIIE	Post exercise	RPS24	-0.245308	17.836	-1.64701	-4.5107	0.101885	0.88465	0.0532287
HIIE	Post exercise	SACM1L	-0.0958468	20.7253	-1.64209	-4.51783	0.102899	0.88465	0.0532287
HIIE	Post exercise	SCLY	0.195952	14.1806	1.64359	-4.51566	0.102592	0.88465	0.0532287
HIIE	Post exercise	SEL1L	-0.0763692	15.4105	-1.65392	-4.50065	0.100468	0.88465	0.0532287
HIIE	Post exercise	SERPINC1	-0.175627	17.0541	-1.65221	-4.50314	0.100819	0.88465	0.0532287
HIIE	Post exercise	SERPINE1	-0.190258	18.6768	-1.65949	-4.49251	0.0993416	0.88465	0.0532287
HIIE	Post exercise	SETX	0.212094	13.501	1.66658	-4.48213	0.0979206	0.88465	0.0532287
HIIE	Post exercise	SH2D1B	0.282097	13.3667	1.65321	-4.50169	0.100616	0.88465	0.0532287
HIIE	Post exercise	SMARCE1	0.166413	14.5695	1.66212	-4.48867	0.0988136	0.88465	0.0532287
HIIE	Post exercise	SZRD1	0.208225	14.2501	1.65068	-4.50537	0.101132	0.88465	0.0532287
HIIE	Post exercise	TMEM175	0.246799	12.9608	1.64484	-4.51385	0.102333	0.88465	0.0532287
HIIE	Post exercise	TMEM179B	0.251934	14.3561	1.6479	-4.50941	0.101703	0.88465	0.0532287
HIIE	Post exercise	TMEM33	-0.122651	18.8109	-1.64798	-4.50929	0.101686	0.88465	0.0532287
HIIE	Post exercise	TMLHE	-0.148573	15.0555	-1.65416	-4.5003	0.100422	0.88465	0.0532287
HIIE	Post exercise	TMUB1	0.252987	15.2824	1.64275	-4.51688	0.102766	0.88465	0.0532287
HIIE	Post exercise	TRIM56	0.0956083	14.5099	1.64995	-4.50642	0.101278	0.88465	0.0532287
HIIE	Post exercise	TUBGCP3	0.0763943	15.4274	1.66336	-4.48684	0.09856	0.88465	0.0532287
HIIE	Post exercise	WDR47	0.189564	12.0159	1.65644	-4.49697	0.0999569	0.88465	0.0532287
HIIE	Post exercise	MYO18A	-0.322434	17.9587	-1.63978	-4.52117	0.103383	0.88683	0.0521598
HIIE	Post exercise	COX15	-0.134559	14.0372	-1.63902	-4.52226	0.103537	0.886896	0.0521272
HIIE	Post exercise	CCL5	-0.294529	19.8892	-1.6366	-4.52577	0.104047	0.887485	0.0518387
HIIE	Post exercise	POGLUT1	-0.0982196	16.5326	-1.63771	-4.52416	0.103812	0.887485	0.0518387
HIIE	Post exercise	PPP4R1	0.156442	13.3883	1.63705	-4.52512	0.10395	0.887485	0.0518387
HIIE	Post exercise	MAFG	-0.171138	13.3585	-1.63522	-4.52775	0.104334	0.887558	0.0518033
HIIE	Post exercise	WDR46	-0.269196	12.7068	-1.63516	-4.52785	0.104349	0.887558	0.0518033
HIIE	Post exercise	ACY1	0.125488	20.6842	1.63243	-4.53177	0.104923	0.888605	0.0512912
HIIE	Post exercise	JUND	0.211971	14.2244	1.63293	-4.53106	0.104819	0.888605	0.0512912
HIIE	Post exercise	RBM38	-0.167099	15.1898	-1.63349	-4.53025	0.1047	0.888605	0.0512912
HIIE	Post exercise	SEC22A	-0.22886	14.7962	-1.63178	-4.53272	0.105061	0.888605	0.0512912
HIIE	Post exercise	SMG1	0.115957	12.6811	1.63106	-4.53374	0.105209	0.888612	0.051288
HIIE	Post exercise	ALOX5	-0.247955	15.8766	-1.62939	-4.53616	0.105566	0.88978	0.0507171
HIIE	Post exercise	ATP5F1D	0.158224	16.9341	1.62791	-4.53828	0.10588	0.88978	0.0507171
HIIE	Post exercise	B3GALT6	-0.0951495	14.3916	-1.62763	-4.53868	0.105937	0.88978	0.0507171
HIIE	Post exercise	HYAL3	-0.223681	13.5833	-1.62886	-4.53691	0.105678	0.88978	0.0507171
HIIE	Post exercise	AIG1	-0.202006	10.875	-1.62552	-4.5417	0.106385	0.889829	0.0506935
HIIE	Post exercise	MGMT	0.153455	15.3556	1.62557	-4.54163	0.106377	0.889829	0.0506935
HIIE	Post exercise	SELENOP	-0.203668	16.1048	-1.62602	-4.54099	0.106282	0.889829	0.0506935
HIIE	Post exercise	ITGB7	0.235295	13.0703	1.62463	-4.54298	0.106578	0.890214	0.0505055
HIIE	Post exercise	ANXA1	0.360314	20.448	1.62343	-4.5447	0.106834	0.890546	0.0503435
HIIE	Post exercise	RAB9B	-0.32719	13.314	-1.62306	-4.54522	0.106913	0.890546	0.0503435
HIIE	Post exercise	FKBP1A	-0.295464	16.9935	-1.6217	-4.54717	0.107204	0.891742	0.0497608
HIIE	Post exercise	CCDC88C	0.141409	13.2203	1.61952	-4.55029	0.107671	0.891911	0.0496783
HIIE	Post exercise	DHTKD1	-0.134332	13.7142	-1.61904	-4.55097	0.107773	0.891911	0.0496783
HIIE	Post exercise	MOB4	0.113278	16.6999	1.61897	-4.55108	0.10779	0.891911	0.0496783
HIIE	Post exercise	TMEM109	-0.13183	18.7584	-1.61886	-4.55123	0.107815	0.891911	0.0496783
HIIE	Post exercise	BPNT2	-0.122249	15.8749	-1.61702	-4.55386	0.108211	0.893371	0.0489684
HIIE	Post exercise	GPI	-0.102829	19.9077	-1.61666	-4.55437	0.108287	0.893371	0.0489684
HIIE	Post exercise	C16orf54	0.245883	12.4433	1.61528	-4.55635	0.108589	0.894186	0.048572
HIIE	Post exercise	CPT1A	-0.103258	19.6729	-1.61415	-4.55794	0.10883	0.894186	0.048572
HIIE	Post exercise	PLXDC2	-0.123312	17.2919	-1.6146	-4.55731	0.108736	0.894186	0.048572
HIIE	Post exercise	CMC1	-0.135726	17.3582	-1.61276	-4.55993	0.109135	0.894243	0.0485445
HIIE	Post exercise	MLKL	-0.102692	15.6707	-1.61208	-4.5609	0.109282	0.894243	0.0485445
HIIE	Post exercise	PLA2G15	-0.124329	15.1309	-1.61259	-4.56017	0.109171	0.894243	0.0485445
HIIE	Post exercise	RNF123	-0.119749	14.2855	-1.61138	-4.56189	0.109434	0.894279	0.0485272
HIIE	Post exercise	AIP	0.105352	15.2963	1.59743	-4.58163	0.112508	0.894282	0.0485255
HIIE	Post exercise	ALYREF	-0.163032	17.4046	-1.57328	-4.61544	0.117998	0.894282	0.0485255
HIIE	Post exercise	ANXA3	0.235043	19.021	1.58382	-4.60075	0.115578	0.894282	0.0485255
HIIE	Post exercise	ARHGDIB	-0.0851034	21.8515	-1.57988	-4.60625	0.116475	0.894282	0.0485255
HIIE	Post exercise	ARHGEF2	0.0698667	16.2436	1.55233	-4.64436	0.122924	0.894282	0.0485255
HIIE	Post exercise	AZGP1	-0.247348	14.7045	-1.57216	-4.617	0.118259	0.894282	0.0485255
HIIE	Post exercise	BAZ2A	0.227957	13.2326	1.60602	-4.56951	0.110611	0.894282	0.0485255
HIIE	Post exercise	C8orf82	-0.139523	15.1298	-1.59049	-4.59141	0.114067	0.894282	0.0485255
HIIE	Post exercise	CDKAL1	-0.214779	14.716	-1.56478	-4.62723	0.11998	0.894282	0.0485255
HIIE	Post exercise	CEP131	-0.170772	13.9043	-1.60832	-4.56624	0.110106	0.894282	0.0485255
HIIE	Post exercise	CHCHD2	-0.285185	15.893	-1.55439	-4.64154	0.122437	0.894282	0.0485255
HIIE	Post exercise	CHM	-0.24612	14.2846	-1.58205	-4.60322	0.115982	0.894282	0.0485255
HIIE	Post exercise	CIAO2A	-0.177134	15.1477	-1.59367	-4.58694	0.113353	0.894282	0.0485255
HIIE	Post exercise	CLCN7	-0.0997909	16.1732	-1.55428	-4.64168	0.122459	0.894282	0.0485255
HIIE	Post exercise	COPG1	0.0803142	18.4254	1.59128	-4.5903	0.113887	0.894282	0.0485255
HIIE	Post exercise	COPZ1	-0.148426	19.2221	-1.56201	-4.63104	0.12063	0.894282	0.0485255
HIIE	Post exercise	COQ9	-0.19662	14.1267	-1.56977	-4.62031	0.118813	0.894282	0.0485255
HIIE	Post exercise	CRADD	-0.181771	16.5958	-1.57639	-4.61112	0.117281	0.894282	0.0485255
HIIE	Post exercise	CYBA	-0.270851	18.075	-1.55765	-4.63706	0.121661	0.894282	0.0485255
HIIE	Post exercise	DEPDC5	0.14975	13.0572	1.57185	-4.61742	0.118326	0.894282	0.0485255
HIIE	Post exercise	DHODH	-0.162493	15.715	-1.58305	-4.60182	0.115753	0.894282	0.0485255
HIIE	Post exercise	DOCK9	-0.262993	15.7238	-1.55495	-4.64077	0.122303	0.894282	0.0485255
HIIE	Post exercise	FKBP3	-0.0780778	18.1279	-1.59153	-4.58994	0.113829	0.894282	0.0485255
HIIE	Post exercise	GDPD1	-0.132572	13.2931	-1.57144	-4.61799	0.118422	0.894282	0.0485255
HIIE	Post exercise	GGH	-0.126594	17.2412	-1.60338	-4.57324	0.111193	0.894282	0.0485255
HIIE	Post exercise	GNA11	-0.121919	20.6008	-1.60283	-4.57402	0.111314	0.894282	0.0485255
HIIE	Post exercise	GNA12	-0.144908	13.8537	-1.58515	-4.59889	0.115273	0.894282	0.0485255
HIIE	Post exercise	GSDMD	0.115298	16.7742	1.55952	-4.63448	0.121217	0.894282	0.0485255
HIIE	Post exercise	H2AZ1	-0.247936	21.5466	-1.56752	-4.62344	0.119339	0.894282	0.0485255
HIIE	Post exercise	HACE1	0.19777	12.8453	1.58006	-4.606	0.116436	0.894282	0.0485255
HIIE	Post exercise	HLA-DMB	-0.21698	14.3779	-1.56876	-4.62171	0.119048	0.894282	0.0485255
HIIE	Post exercise	HRG	-0.189631	17.1082	-1.60987	-4.56404	0.109766	0.894282	0.0485255
HIIE	Post exercise	INPP5D	0.10996	16.6332	1.56808	-4.62266	0.119206	0.894282	0.0485255
HIIE	Post exercise	LILRB3	-0.287462	12.9236	-1.56041	-4.63326	0.121008	0.894282	0.0485255
HIIE	Post exercise	LRSAM1	0.162656	13.2911	1.55218	-4.64457	0.122962	0.894282	0.0485255
HIIE	Post exercise	LYRM4	-0.212392	15.0225	-1.58476	-4.59944	0.115365	0.894282	0.0485255
HIIE	Post exercise	METTL9	-0.180751	14.556	-1.56605	-4.62546	0.119681	0.894282	0.0485255
HIIE	Post exercise	MICALL1	-0.169034	14.2047	-1.57727	-4.60989	0.117077	0.894282	0.0485255
HIIE	Post exercise	MMP9	0.626493	15.5785	1.58805	-4.59483	0.114618	0.894282	0.0485255
HIIE	Post exercise	MRPL45	-0.133764	15.6938	-1.59374	-4.58684	0.113337	0.894282	0.0485255
HIIE	Post exercise	MRRF	-0.126647	15.9979	-1.56945	-4.62077	0.118889	0.894282	0.0485255
HIIE	Post exercise	MSRB3	-0.192384	15.3187	-1.60046	-4.57736	0.111837	0.894282	0.0485255
HIIE	Post exercise	MTM1	-0.121841	16.4058	-1.56454	-4.62756	0.120036	0.894282	0.0485255
HIIE	Post exercise	NAA15	-0.0794797	15.9137	-1.58525	-4.59874	0.115249	0.894282	0.0485255
HIIE	Post exercise	NDUFB9	-0.225201	17.1429	-1.58251	-4.60258	0.115876	0.894282	0.0485255
HIIE	Post exercise	NDUFS7	-0.259982	17.1175	-1.58322	-4.60159	0.115716	0.894282	0.0485255
HIIE	Post exercise	NFKBIE	0.252565	12.8125	1.55785	-4.63678	0.121614	0.894282	0.0485255
HIIE	Post exercise	NHERF1	0.114416	18.2593	1.56931	-4.62096	0.118921	0.894282	0.0485255
HIIE	Post exercise	NIBAN1	0.116083	16.0334	1.57512	-4.61288	0.117571	0.894282	0.0485255
HIIE	Post exercise	NOC3L	-0.276152	13.3881	-1.57656	-4.61088	0.117241	0.894282	0.0485255
HIIE	Post exercise	NOL7	-0.209179	14.0557	-1.57657	-4.61087	0.117239	0.894282	0.0485255
HIIE	Post exercise	OPTN	-0.314316	12.8707	-1.55261	-4.64399	0.122863	0.894282	0.0485255
HIIE	Post exercise	ORAI1	0.343745	13.8493	1.56526	-4.62656	0.119867	0.894282	0.0485255
HIIE	Post exercise	PARP10	0.102116	14.8878	1.55963	-4.63433	0.12119	0.894282	0.0485255
HIIE	Post exercise	PCBP1	0.0778548	19.2017	1.55964	-4.63432	0.121187	0.894282	0.0485255
HIIE	Post exercise	PIK3CA	0.113306	13.8291	1.55177	-4.64513	0.123058	0.894282	0.0485255
HIIE	Post exercise	PLEKHF1	0.289139	13.82	1.58269	-4.60233	0.115836	0.894282	0.0485255
HIIE	Post exercise	PLSCR1	-0.171439	15.017	-1.5736	-4.615	0.117924	0.894282	0.0485255
HIIE	Post exercise	POLR3F	-0.282946	15.5659	-1.55243	-4.64423	0.122905	0.894282	0.0485255
HIIE	Post exercise	PPBP	-0.217812	27.1919	-1.55566	-4.63979	0.122134	0.894282	0.0485255
HIIE	Post exercise	PPP2R1B	0.411082	13.0052	1.60324	-4.57344	0.111224	0.894282	0.0485255
HIIE	Post exercise	PSMA5	0.115349	18.5713	1.58067	-4.60515	0.116296	0.894282	0.0485255
HIIE	Post exercise	PTDSS1	-0.144486	14.1794	-1.55797	-4.63662	0.121585	0.894282	0.0485255
HIIE	Post exercise	PTMS	0.407694	12.2362	1.55333	-4.643	0.12269	0.894282	0.0485255
HIIE	Post exercise	RAB33A	-0.127765	16.7315	-1.57837	-4.60836	0.116826	0.894282	0.0485255
HIIE	Post exercise	RAB3C	-0.204344	16.3631	-1.60864	-4.56578	0.110035	0.894282	0.0485255
HIIE	Post exercise	RAB4A	-0.100485	17.5028	-1.56259	-4.63025	0.120491	0.894282	0.0485255
HIIE	Post exercise	RAB8A	-0.0937609	19.2279	-1.57973	-4.60646	0.11651	0.894282	0.0485255
HIIE	Post exercise	RAP1B	-0.122313	25.2351	-1.6052	-4.57066	0.110788	0.894282	0.0485255
HIIE	Post exercise	RBP7	-0.199615	14.6889	-1.57265	-4.61632	0.118145	0.894282	0.0485255
HIIE	Post exercise	RHOA	-0.166485	19.4307	-1.60004	-4.57796	0.111932	0.894282	0.0485255
HIIE	Post exercise	RMDN2	0.129991	12.7521	1.55659	-4.63851	0.12191	0.894282	0.0485255
HIIE	Post exercise	RRM1	0.249357	12.8285	1.5542	-4.6418	0.122482	0.894282	0.0485255
HIIE	Post exercise	RTF2	-0.227058	13.929	-1.56504	-4.62687	0.119919	0.894282	0.0485255
HIIE	Post exercise	RUNX2	0.178923	17.5957	1.57724	-4.60993	0.117085	0.894282	0.0485255
HIIE	Post exercise	S100A6	0.176667	17.7734	1.55689	-4.6381	0.121841	0.894282	0.0485255
HIIE	Post exercise	SCRN1	0.104804	14.5004	1.5771	-4.61013	0.117113	0.894282	0.0485255
HIIE	Post exercise	SFT2D2	-0.187199	14.6992	-1.56803	-4.62273	0.11922	0.894282	0.0485255
HIIE	Post exercise	SLC25A15	-0.127748	15.8236	-1.55809	-4.63645	0.121556	0.894282	0.0485255
HIIE	Post exercise	SPNS1	-0.177908	15.277	-1.58654	-4.59694	0.114959	0.894282	0.0485255
HIIE	Post exercise	SPRYD7	-0.109876	14.2992	-1.55256	-4.64405	0.122871	0.894282	0.0485255
HIIE	Post exercise	TCAF1	0.136091	12.8168	1.56598	-4.62556	0.119695	0.894282	0.0485255
HIIE	Post exercise	TMEM9	0.296071	12.4736	1.57152	-4.61789	0.118407	0.894282	0.0485255
HIIE	Post exercise	TOR1AIP1	0.157054	16.5693	1.57544	-4.61245	0.1175	0.894282	0.0485255
HIIE	Post exercise	TP53I3	-0.131166	16.1818	-1.55291	-4.64357	0.122789	0.894282	0.0485255
HIIE	Post exercise	TRAF6	-0.118857	15.7553	-1.5864	-4.59714	0.11499	0.894282	0.0485255
HIIE	Post exercise	UBAC2	-0.183246	19.3429	-1.55265	-4.64393	0.122852	0.894282	0.0485255
HIIE	Post exercise	UBE2D3	0.346403	18.2354	1.60025	-4.57766	0.111885	0.894282	0.0485255
HIIE	Post exercise	VAMP4	0.180716	12.9548	1.59343	-4.58728	0.113407	0.894282	0.0485255
HIIE	Post exercise	VWA8	0.11757	14.2872	1.57618	-4.6114	0.117325	0.894282	0.0485255
HIIE	Post exercise	YKT6	-0.0739766	16.1554	-1.58672	-4.59669	0.114916	0.894282	0.0485255
HIIE	Post exercise	ZRANB2	-0.292967	14.5015	-1.57285	-4.61605	0.118099	0.894282	0.0485255
HIIE	Post exercise	PYCR2	0.180131	13.3857	1.54993	-4.64766	0.123503	0.894288	0.0485224
HIIE	Post exercise	RAB22A	-0.111312	14.2186	-1.55097	-4.64623	0.123251	0.894288	0.0485224
HIIE	Post exercise	USP22	0.188487	12.2509	1.54995	-4.64763	0.123498	0.894288	0.0485224
HIIE	Post exercise	ARL5A	-0.150421	14.4274	-1.54848	-4.64965	0.123853	0.895169	0.0480949
HIIE	Post exercise	HLA-DRB3	-0.260073	16.3559	-1.54689	-4.65181	0.124234	0.895169	0.0480949
HIIE	Post exercise	MRPL58	-0.146264	15.8506	-1.54512	-4.65424	0.124663	0.895169	0.0480949
HIIE	Post exercise	OCRL	-0.128675	14.6092	-1.54571	-4.65343	0.124519	0.895169	0.0480949
HIIE	Post exercise	SPTLC2	-0.0799022	15.0468	-1.54562	-4.65354	0.124538	0.895169	0.0480949
HIIE	Post exercise	TFIP11	-0.223491	13.4023	-1.54552	-4.65369	0.124567	0.895169	0.0480949
HIIE	Post exercise	USP48	-0.181092	13.9038	-1.54754	-4.65092	0.124077	0.895169	0.0480949
HIIE	Post exercise	CSNK1A1	-0.123107	15.6125	-1.54372	-4.65614	0.125	0.896526	0.0474371
HIIE	Post exercise	C1QBP	-0.146313	17.9972	-1.54216	-4.65827	0.12538	0.897922	0.0467612
HIIE	Post exercise	CHCHD4	-0.230369	12.7392	-1.5413	-4.65944	0.125588	0.897922	0.0467612
HIIE	Post exercise	LYN	-0.0899845	19.01	-1.54107	-4.65975	0.125641	0.897922	0.0467612
HIIE	Post exercise	EPB42	-0.345548	14.2473	-1.53276	-4.67104	0.127678	0.898065	0.0466921
HIIE	Post exercise	ESD	-0.0673648	19.543	-1.5301	-4.67464	0.128332	0.898065	0.0466921
HIIE	Post exercise	FAR1	-0.123663	14.6146	-1.53382	-4.66961	0.127416	0.898065	0.0466921
HIIE	Post exercise	HSDL1	-0.103391	17.7601	-1.53063	-4.67392	0.128201	0.898065	0.0466921
HIIE	Post exercise	KCNN4	-0.178163	12.3003	-1.53085	-4.67363	0.128148	0.898065	0.0466921
HIIE	Post exercise	LACTB	-0.0914511	16.1267	-1.53168	-4.67251	0.127943	0.898065	0.0466921
HIIE	Post exercise	LSM1	0.108609	16.1634	1.52832	-4.67705	0.128774	0.898065	0.0466921
HIIE	Post exercise	MRGBP	0.228913	13.7973	1.53068	-4.67387	0.128193	0.898065	0.0466921
HIIE	Post exercise	MRPL49	-0.133042	15.0215	-1.5306	-4.67397	0.128212	0.898065	0.0466921
HIIE	Post exercise	NAA20	0.145845	13.5954	1.53207	-4.67197	0.127846	0.898065	0.0466921
HIIE	Post exercise	NUMB	-0.0843106	15.6555	-1.52929	-4.67574	0.128533	0.898065	0.0466921
HIIE	Post exercise	P2RX4	-0.254002	13.8114	-1.53253	-4.67136	0.127737	0.898065	0.0466921
HIIE	Post exercise	PITPNA	-0.0874083	14.799	-1.53011	-4.67463	0.128329	0.898065	0.0466921
HIIE	Post exercise	PPAN	0.268691	13.0778	1.52896	-4.67618	0.128617	0.898065	0.0466921
HIIE	Post exercise	PRRC2A	0.13154	14.697	1.53062	-4.67395	0.128207	0.898065	0.0466921
HIIE	Post exercise	RAB37	-0.104559	18.7323	-1.53603	-4.66661	0.126873	0.898065	0.0466921
HIIE	Post exercise	RANBP6	0.191245	12.4294	1.52986	-4.67498	0.128396	0.898065	0.0466921
HIIE	Post exercise	SDCBP	-0.146529	14.5139	-1.53717	-4.66506	0.126596	0.898065	0.0466921
HIIE	Post exercise	SLC25A13	-0.0921228	15.2432	-1.53667	-4.66573	0.126714	0.898065	0.0466921
HIIE	Post exercise	UBQLN2	0.215615	12.3364	1.52936	-4.67565	0.128519	0.898065	0.0466921
HIIE	Post exercise	VPS26C	-0.0983403	15.1814	-1.52828	-4.67711	0.128784	0.898065	0.0466921
HIIE	Post exercise	CSNK2A2	0.137667	16.5145	1.52591	-4.68031	0.129377	0.90116	0.045198
HIIE	Post exercise	GTF2E2	0.207679	12.4149	1.52356	-4.68348	0.129962	0.902667	0.0444725
HIIE	Post exercise	TMUB2	-0.201304	12.5499	-1.52324	-4.68391	0.130041	0.902667	0.0444725
HIIE	Post exercise	XXYLT1	-0.142945	12.693	-1.52421	-4.6826	0.129796	0.902667	0.0444725
HIIE	Post exercise	AP5M1	-0.160976	14.2028	-1.51061	-4.70085	0.133228	0.905383	0.0431676
HIIE	Post exercise	ATXN2	-0.215171	13.1347	-1.50907	-4.70291	0.133622	0.905383	0.0431676
HIIE	Post exercise	CCDC47	-0.0839468	15.5681	-1.50943	-4.70242	0.133526	0.905383	0.0431676
HIIE	Post exercise	CCDC88A	-0.0966608	14.0661	-1.51057	-4.7009	0.133235	0.905383	0.0431676
HIIE	Post exercise	CEBPZ	-0.201352	13.3905	-1.50408	-4.70956	0.1349	0.905383	0.0431676
HIIE	Post exercise	CPPED1	-0.174564	17.5211	-1.50438	-4.70916	0.134824	0.905383	0.0431676
HIIE	Post exercise	CROT	0.194284	13.1571	1.52102	-4.6869	0.130598	0.905383	0.0431676
HIIE	Post exercise	DDX3X	0.0836998	18.9679	1.51036	-4.70118	0.133289	0.905383	0.0431676
HIIE	Post exercise	DIS3	0.142872	14.731	1.50222	-4.71203	0.13538	0.905383	0.0431676
HIIE	Post exercise	EEF1E1	-0.133904	16.6902	-1.50222	-4.71203	0.13538	0.905383	0.0431676
HIIE	Post exercise	EIF4A2	0.0927179	17.9161	1.51439	-4.6958	0.132266	0.905383	0.0431676
HIIE	Post exercise	FRMD8	0.107758	14.4529	1.5197	-4.68867	0.130926	0.905383	0.0431676
HIIE	Post exercise	FUCA1	-0.114192	16.3278	-1.50653	-4.7063	0.134272	0.905383	0.0431676
HIIE	Post exercise	HECTD1	0.0993017	14.3431	1.50715	-4.70547	0.13411	0.905383	0.0431676
HIIE	Post exercise	MRS2	-0.151866	14.6577	-1.51495	-4.69504	0.132127	0.905383	0.0431676
HIIE	Post exercise	MYG1	-0.131995	16.2024	-1.50485	-4.70853	0.134702	0.905383	0.0431676
HIIE	Post exercise	NAGA	-0.129739	17.1846	-1.50889	-4.70315	0.133669	0.905383	0.0431676
HIIE	Post exercise	OTULINL	-0.182869	17.147	-1.50687	-4.70584	0.134184	0.905383	0.0431676
HIIE	Post exercise	PIEZO1	-0.123035	12.4876	-1.51346	-4.69704	0.132502	0.905383	0.0431676
HIIE	Post exercise	PIP4K2C	0.0775842	15.0213	1.50884	-4.70322	0.133678	0.905383	0.0431676
HIIE	Post exercise	PSMB5	-0.0933593	18.2872	-1.50852	-4.70364	0.133759	0.905383	0.0431676
HIIE	Post exercise	SAR1B	-0.137052	20.3426	-1.50418	-4.70942	0.134874	0.905383	0.0431676
HIIE	Post exercise	SIGMAR1	-0.153193	16.3213	-1.51187	-4.69916	0.132907	0.905383	0.0431676
HIIE	Post exercise	SKP1	0.120307	14.4662	1.50275	-4.71132	0.135239	0.905383	0.0431676
HIIE	Post exercise	SLC16A1	-0.163754	13.8163	-1.51744	-4.69171	0.131498	0.905383	0.0431676
HIIE	Post exercise	SLC18A2	-0.150271	16.22	-1.5189	-4.68974	0.131129	0.905383	0.0431676
HIIE	Post exercise	SLC35B4	-0.147655	16.1707	-1.51666	-4.69276	0.131696	0.905383	0.0431676
HIIE	Post exercise	SLFN5	0.180679	16.2987	1.51275	-4.69799	0.132685	0.905383	0.0431676
HIIE	Post exercise	SMC2	-0.145112	13.9861	-1.51228	-4.69862	0.132802	0.905383	0.0431676
HIIE	Post exercise	TBC1D10C	0.207407	15.7397	1.51758	-4.69151	0.131462	0.905383	0.0431676
HIIE	Post exercise	TMEM147	-0.386655	12.9771	-1.51637	-4.69314	0.131768	0.905383	0.0431676
HIIE	Post exercise	TTC39C	0.262446	12.7008	1.50251	-4.71164	0.135305	0.905383	0.0431676
HIIE	Post exercise	YWHAG	-0.0716689	21.3185	-1.50842	-4.70377	0.133783	0.905383	0.0431676
HIIE	Post exercise	DUS4L-BCAP29	-0.117513	14.5286	-1.50109	-4.71353	0.135669	0.906309	0.0427239
HIIE	Post exercise	CYP27A1	-0.232888	13.9507	-1.49943	-4.71574	0.136101	0.907193	0.0423003
HIIE	Post exercise	PARD3	-0.112252	16.6235	-1.4998	-4.71525	0.136005	0.907193	0.0423003
HIIE	Post exercise	CLU	-0.18368	19.4482	-1.49659	-4.71951	0.136839	0.909099	0.0413886
HIIE	Post exercise	LIME1	0.206087	13.523	1.49724	-4.71864	0.136669	0.909099	0.0413886
HIIE	Post exercise	MED18	0.157753	14.0742	1.49714	-4.71878	0.136696	0.909099	0.0413886
HIIE	Post exercise	MVP	0.103869	19.0803	1.49558	-4.72084	0.1371	0.909834	0.0410379
HIIE	Post exercise	COQ5	-0.121465	13.9293	-1.49264	-4.72473	0.137866	0.912911	0.0395716
HIIE	Post exercise	TIMM10B	0.171226	14.9663	1.49278	-4.72454	0.137832	0.912911	0.0395716
HIIE	Post exercise	ALAD	-0.108871	19.677	-1.482	-4.73873	0.140675	0.913339	0.0393682
HIIE	Post exercise	ANPEP	-0.276001	14.163	-1.49054	-4.7275	0.138419	0.913339	0.0393682
HIIE	Post exercise	APLP2	-0.174598	15.0069	-1.48151	-4.73937	0.140804	0.913339	0.0393682
HIIE	Post exercise	ARFGAP1	-0.147672	14.7395	-1.48911	-4.72938	0.138794	0.913339	0.0393682
HIIE	Post exercise	CFI	0.254514	15.3725	1.48195	-4.73879	0.140688	0.913339	0.0393682
HIIE	Post exercise	CHSY1	-0.161827	14.0144	-1.48774	-4.73118	0.139154	0.913339	0.0393682
HIIE	Post exercise	ING1	-0.163816	13.2761	-1.4904	-4.72768	0.138455	0.913339	0.0393682
HIIE	Post exercise	LILRB2	-0.224252	14.4468	-1.48888	-4.72969	0.138856	0.913339	0.0393682
HIIE	Post exercise	MICOS13	-0.123996	15.2567	-1.48272	-4.73778	0.140483	0.913339	0.0393682
HIIE	Post exercise	MTMR1	0.12657	14.2858	1.48482	-4.73502	0.139923	0.913339	0.0393682
HIIE	Post exercise	NDUFB11	0.224462	17.2554	1.48183	-4.73896	0.140721	0.913339	0.0393682
HIIE	Post exercise	PTTG1IP	-0.218356	16.3556	-1.48762	-4.73135	0.139187	0.913339	0.0393682
HIIE	Post exercise	QSOX1	-0.171913	17.1485	-1.48593	-4.73357	0.139633	0.913339	0.0393682
HIIE	Post exercise	RAB4B	-0.072183	18.4383	-1.48717	-4.73193	0.139302	0.913339	0.0393682
HIIE	Post exercise	SERPINA4	-0.220585	15.1917	-1.48523	-4.73448	0.139817	0.913339	0.0393682
HIIE	Post exercise	SERPINB8	-0.162403	18.7953	-1.48274	-4.73775	0.140477	0.913339	0.0393682
HIIE	Post exercise	SLC16A3	-0.10915	17.7546	-1.49003	-4.72817	0.138552	0.913339	0.0393682
HIIE	Post exercise	SRPRA	-0.0769791	15.8248	-1.49144	-4.72631	0.138181	0.913339	0.0393682
HIIE	Post exercise	U2AF1	-0.239466	19.6072	-1.48559	-4.73401	0.139723	0.913339	0.0393682
HIIE	Post exercise	DGUOK	-0.145772	15.5789	-1.48012	-4.74119	0.141174	0.914754	0.0386959
HIIE	Post exercise	TMEM63B	-0.238447	16.0664	-1.4788	-4.74292	0.141526	0.915073	0.0385443
HIIE	Post exercise	ZMPSTE24	-0.0928307	17.0856	-1.47895	-4.74273	0.141485	0.915073	0.0385443
HIIE	Post exercise	PDGFD	-0.157134	15.9706	-1.47603	-4.74654	0.142268	0.9181	0.0371101
HIIE	Post exercise	RAB5C	-0.0700232	20.0396	-1.47591	-4.74671	0.142299	0.9181	0.0371101
HIIE	Post exercise	ACYP2	-0.0980009	15.4777	-1.46998	-4.75444	0.143896	0.918591	0.0368776
HIIE	Post exercise	C5	-0.123305	16.3575	-1.47374	-4.74954	0.142885	0.918591	0.0368776
HIIE	Post exercise	CD55	0.34412	17.916	1.47283	-4.75072	0.143128	0.918591	0.0368776
HIIE	Post exercise	GAS7	-0.224653	12.8833	-1.47369	-4.74961	0.142898	0.918591	0.0368776
HIIE	Post exercise	LRPAP1	-0.136826	14.3399	-1.46774	-4.75735	0.144504	0.918591	0.0368776
HIIE	Post exercise	MFNG	-0.11778	13.8947	-1.47125	-4.75277	0.14355	0.918591	0.0368776
HIIE	Post exercise	NDUFB7	-0.154292	17.2262	-1.46775	-4.75734	0.144503	0.918591	0.0368776
HIIE	Post exercise	QRICH1	0.19785	13.1559	1.47401	-4.74918	0.142811	0.918591	0.0368776
HIIE	Post exercise	SLC25A35	-0.0925216	14.3985	-1.47003	-4.75437	0.143881	0.918591	0.0368776
HIIE	Post exercise	SLC27A1	-0.116004	15.6045	-1.46861	-4.75622	0.144269	0.918591	0.0368776
HIIE	Post exercise	TIMP3	-0.216901	17.094	-1.46847	-4.7564	0.144306	0.918591	0.0368776
HIIE	Post exercise	TMEM68	-0.130493	14.811	-1.47124	-4.75279	0.143557	0.918591	0.0368776
HIIE	Post exercise	TTC7A	-0.217824	12.2729	-1.4694	-4.75518	0.144054	0.918591	0.0368776
HIIE	Post exercise	ZNF865	-0.247266	12.0405	-1.471	-4.75311	0.143623	0.918591	0.0368776
HIIE	Post exercise	ECI1	-0.179462	16.3085	-1.46717	-4.75808	0.144658	0.918604	0.0368715
HIIE	Post exercise	BCKDHB	0.188379	15.2979	1.4657	-4.75999	0.145058	0.919325	0.0365309
HIIE	Post exercise	NCOR1	-0.175264	14.0947	-1.46564	-4.76008	0.145076	0.919325	0.0365309
HIIE	Post exercise	IVD	-0.0747153	19.1653	-1.4649	-4.76104	0.145275	0.919619	0.0363921
HIIE	Post exercise	ALG6	-0.199465	14.1907	-1.45955	-4.76797	0.146742	0.920222	0.0361075
HIIE	Post exercise	CA13	-0.129221	17.684	-1.46009	-4.76726	0.146592	0.920222	0.0361075
HIIE	Post exercise	CYP2S1	-0.223491	12.9891	-1.46323	-4.76321	0.145734	0.920222	0.0361075
HIIE	Post exercise	ENY2	0.167277	15.1725	1.46288	-4.76365	0.145827	0.920222	0.0361075
HIIE	Post exercise	HSD17B12	-0.090017	18.8724	-1.46031	-4.76698	0.14653	0.920222	0.0361075
HIIE	Post exercise	KPNB1	0.169876	18.2001	1.46063	-4.76656	0.146443	0.920222	0.0361075
HIIE	Post exercise	SLC25A40	-0.119494	15.688	-1.45972	-4.76774	0.146694	0.920222	0.0361075
HIIE	Post exercise	SNX8	-0.092699	14.7762	-1.46119	-4.76584	0.146288	0.920222	0.0361075
HIIE	Post exercise	UBLCP1	0.159546	15.7932	1.46251	-4.76414	0.145931	0.920222	0.0361075
HIIE	Post exercise	CHMP1B	-0.131653	16.68	-1.45697	-4.77129	0.147449	0.921265	0.0356155
HIIE	Post exercise	CR1	-0.240126	15.5997	-1.45672	-4.77161	0.147518	0.921265	0.0356155
HIIE	Post exercise	GALK2	0.114768	15.3594	1.45763	-4.77044	0.147266	0.921265	0.0356155
HIIE	Post exercise	NSMCE1	0.186031	14.0624	1.45775	-4.77029	0.147236	0.921265	0.0356155
HIIE	Post exercise	ANO6	-0.108362	19.044	-1.45615	-4.77235	0.147677	0.921301	0.0355983
HIIE	Post exercise	GRAP	-0.15	14.4474	-1.45543	-4.77328	0.147875	0.921586	0.035464
HIIE	Post exercise	ACAT2	0.119701	17.7903	1.45002	-4.78025	0.149377	0.922175	0.0351866
HIIE	Post exercise	BTD	-0.101217	13.9855	-1.45238	-4.77721	0.148718	0.922175	0.0351866
HIIE	Post exercise	CD14	-0.228342	16.3651	-1.45231	-4.7773	0.148739	0.922175	0.0351866
HIIE	Post exercise	DDX6	0.0807325	16.9632	1.45008	-4.78016	0.149355	0.922175	0.0351866
HIIE	Post exercise	FASTKD5	-0.131329	15.477	-1.45148	-4.77837	0.14897	0.922175	0.0351866
HIIE	Post exercise	ICAM3	0.188748	17.4704	1.45253	-4.77702	0.148679	0.922175	0.0351866
HIIE	Post exercise	RB1	-0.194107	12.0209	-1.4502	-4.78002	0.149327	0.922175	0.0351866
HIIE	Post exercise	RFTN1	0.121748	15.0284	1.45031	-4.77987	0.149295	0.922175	0.0351866
HIIE	Post exercise	STT3A	-0.0956996	19.633	-1.44958	-4.78081	0.149497	0.922175	0.0351866
HIIE	Post exercise	TES	0.18243	16.4726	1.45339	-4.77591	0.14844	0.922175	0.0351866
HIIE	Post exercise	CCRL2	-0.155556	15.4441	-1.44725	-4.7838	0.150149	0.92243	0.0350664
HIIE	Post exercise	COPS3	-0.0972604	17.9204	-1.44692	-4.78423	0.15024	0.92243	0.0350664
HIIE	Post exercise	EPN1	-0.342162	14.8087	-1.44796	-4.78289	0.149951	0.92243	0.0350664
HIIE	Post exercise	RAB7A	-0.0892532	22.0363	-1.44615	-4.78521	0.150454	0.92243	0.0350664
HIIE	Post exercise	SPARC	-0.18493	18.4389	-1.44649	-4.78478	0.150363	0.92243	0.0350664
HIIE	Post exercise	SRSF4	0.286178	11.8106	1.44797	-4.78287	0.149948	0.92243	0.0350664
HIIE	Post exercise	BLTP2	-0.0792953	14.0345	-1.43937	-4.79388	0.152362	0.925111	0.0338061
HIIE	Post exercise	CDC27	-0.126488	13.9773	-1.43861	-4.79484	0.152577	0.925111	0.0338061
HIIE	Post exercise	CYFIP2	0.145894	15.4772	1.43955	-4.79365	0.152314	0.925111	0.0338061
HIIE	Post exercise	DCAF11	0.0959054	14.7472	1.44233	-4.7901	0.151527	0.925111	0.0338061
HIIE	Post exercise	DTD1	-0.109122	15.5371	-1.44275	-4.78955	0.151408	0.925111	0.0338061
HIIE	Post exercise	GALNT1	-0.0894502	16.3088	-1.4387	-4.79473	0.152552	0.925111	0.0338061
HIIE	Post exercise	RNASE2	-0.227144	17.9557	-1.43914	-4.79417	0.15243	0.925111	0.0338061
HIIE	Post exercise	SEPSECS	-0.105707	14.0677	-1.44205	-4.79046	0.151606	0.925111	0.0338061
HIIE	Post exercise	SERPINE2	-0.244024	16.8034	-1.44022	-4.79279	0.152124	0.925111	0.0338061
HIIE	Post exercise	TFPI	-0.217135	16.1801	-1.44326	-4.78891	0.151268	0.925111	0.0338061
HIIE	Post exercise	VPS36	-0.0859552	15.152	-1.4396	-4.79358	0.152295	0.925111	0.0338061
HIIE	Post exercise	HECA	0.19814	13.5433	1.438	-4.79562	0.152753	0.925251	0.0337406
HIIE	Post exercise	POLR3A	-0.189994	13.153	-1.43571	-4.79854	0.153402	0.928254	0.0323332
HIIE	Post exercise	TIMM29	0.130099	14.2772	1.43512	-4.79929	0.153568	0.928325	0.0322997
HIIE	Post exercise	CD79B	-0.282188	13.9026	-1.43341	-4.80146	0.154057	0.929418	0.0317889
HIIE	Post exercise	LSM4	-0.266873	16.5367	-1.43352	-4.80132	0.154026	0.929418	0.0317889
HIIE	Post exercise	CERS2	-0.121959	18.7805	-1.43246	-4.80266	0.154327	0.930118	0.0314621
HIIE	Post exercise	AFG2A	0.258276	12.6307	1.43175	-4.80357	0.154531	0.930423	0.0313195
HIIE	Post exercise	CRISPLD1	-0.179886	14.0259	-1.42723	-4.80929	0.155827	0.930904	0.0310952
HIIE	Post exercise	EMC3	-0.0733308	15.8238	-1.4273	-4.8092	0.155802	0.930904	0.0310952
HIIE	Post exercise	GABPA	0.144176	15.3645	1.4256	-4.81136	0.156297	0.930904	0.0310952
HIIE	Post exercise	GPAT4	-0.129219	13.8386	-1.42653	-4.81018	0.156025	0.930904	0.0310952
HIIE	Post exercise	MARK2	0.0569653	15.5733	1.42797	-4.80835	0.155609	0.930904	0.0310952
HIIE	Post exercise	MCEMP1	-0.189074	16.0734	-1.4277	-4.80869	0.15569	0.930904	0.0310952
HIIE	Post exercise	NMRK1	-0.129969	14.6107	-1.42802	-4.8083	0.155601	0.930904	0.0310952
HIIE	Post exercise	PSMB6	-0.0940573	17.8663	-1.42538	-4.81163	0.156355	0.930904	0.0310952
HIIE	Post exercise	PSMB7	-0.100834	17.5551	-1.42713	-4.80942	0.155855	0.930904	0.0310952
HIIE	Post exercise	RPS6KA5	0.287071	16.9952	1.42503	-4.81208	0.156461	0.930904	0.0310952
HIIE	Post exercise	STARD3NL	0.154326	16.098	1.42923	-4.80677	0.155253	0.930904	0.0310952
HIIE	Post exercise	STAT2	-0.0946054	14.1445	-1.42553	-4.81144	0.156312	0.930904	0.0310952
HIIE	Post exercise	ABCB7	-0.0693785	16.285	-1.41867	-4.82009	0.158302	0.93138	0.0308731
HIIE	Post exercise	AFTPH	0.197996	12.1833	1.41762	-4.82142	0.158611	0.93138	0.0308731
HIIE	Post exercise	ATG4D	-0.133559	13.1985	-1.4173	-4.82181	0.1587	0.93138	0.0308731
HIIE	Post exercise	BECN1	0.108836	15.6816	1.42051	-4.81777	0.157768	0.93138	0.0308731
HIIE	Post exercise	CDKN1B	0.169529	13.3633	1.42373	-4.81371	0.156835	0.93138	0.0308731
HIIE	Post exercise	CEBPB	-0.237153	15.1529	-1.4218	-4.81615	0.157394	0.93138	0.0308731
HIIE	Post exercise	ERP44	0.103812	19.9623	1.41754	-4.82151	0.158633	0.93138	0.0308731
HIIE	Post exercise	ND5	-0.166381	13.4837	-1.42187	-4.81606	0.157375	0.93138	0.0308731
HIIE	Post exercise	PGS1	-0.0889396	15.3599	-1.41872	-4.82002	0.158285	0.93138	0.0308731
HIIE	Post exercise	PPP4R2	0.30397	14.2685	1.42316	-4.81444	0.157001	0.93138	0.0308731
HIIE	Post exercise	PRKD3	0.31154	12.2684	1.41862	-4.82015	0.158319	0.93138	0.0308731
HIIE	Post exercise	RAB12	-0.083057	14.9241	-1.41877	-4.81997	0.158272	0.93138	0.0308731
HIIE	Post exercise	SNRPG	-0.278222	18.3727	-1.41867	-4.82009	0.158304	0.93138	0.0308731
HIIE	Post exercise	SPIN1	-0.207638	13.0288	-1.42233	-4.81548	0.157241	0.93138	0.0308731
HIIE	Post exercise	LYPLAL1	-0.0549881	17.0633	-1.41646	-4.82287	0.158946	0.931919	0.0306221
HIIE	Post exercise	FAHD1	-0.129698	15.9168	-1.41354	-4.82653	0.159803	0.933527	0.0298729
HIIE	Post exercise	FKBP11	0.177393	16.6182	1.41374	-4.82628	0.159744	0.933527	0.0298729
HIIE	Post exercise	NDST1	-0.108221	13.5395	-1.41341	-4.8267	0.159839	0.933527	0.0298729
HIIE	Post exercise	POLG	-0.179203	12.3991	-1.41361	-4.82645	0.159783	0.933527	0.0298729
HIIE	Post exercise	OASL	0.239025	13.2001	1.4127	-4.82758	0.160048	0.933846	0.0297248
HIIE	Post exercise	DNAJC16	-0.127545	14.6744	-1.41169	-4.82884	0.160345	0.934677	0.0293385
HIIE	Post exercise	SERPINB9	0.0889486	19.4586	1.41058	-4.83023	0.160668	0.935654	0.0288847
HIIE	Post exercise	ANXA6	0.366023	21.356	1.4084	-4.83295	0.161314	0.93568	0.0288727
HIIE	Post exercise	GPD2	-0.112093	20.588	-1.40753	-4.83404	0.161571	0.93568	0.0288727
HIIE	Post exercise	IGKV4-1	-0.193311	15.443	-1.40691	-4.83482	0.161757	0.93568	0.0288727
HIIE	Post exercise	MEAK7	-0.109178	14.7813	-1.40931	-4.83182	0.161043	0.93568	0.0288727
HIIE	Post exercise	SUGP2	0.159894	16.4962	1.40764	-4.83391	0.16154	0.93568	0.0288727
HIIE	Post exercise	SURF4	-0.128859	18.0857	-1.40927	-4.83188	0.16106	0.93568	0.0288727
HIIE	Post exercise	WWOX	-0.163812	12.3395	-1.40716	-4.8345	0.161679	0.93568	0.0288727
HIIE	Post exercise	COX6C	-0.124907	17.0429	-1.40438	-4.83798	0.162507	0.93912	0.0272791
HIIE	Post exercise	ABCB6	-0.136051	15.4508	-1.39553	-4.84896	0.165152	0.942626	0.0256605
HIIE	Post exercise	ADAM17	-0.117325	13.5877	-1.39092	-4.85465	0.166538	0.942626	0.0256605
HIIE	Post exercise	ATP8A1	-0.0997975	18.1602	-1.3808	-4.8671	0.169625	0.942626	0.0256605
HIIE	Post exercise	BLOC1S4	0.154774	13.978	1.39374	-4.85118	0.165691	0.942626	0.0256605
HIIE	Post exercise	BLVRA	-0.0652663	19.1488	-1.38695	-4.85955	0.167744	0.942626	0.0256605
HIIE	Post exercise	BNIP2	-0.134312	16.488	-1.39636	-4.84793	0.164902	0.942626	0.0256605
HIIE	Post exercise	BROX	-0.0626897	17.6271	-1.38229	-4.86527	0.169166	0.942626	0.0256605
HIIE	Post exercise	BTN3A3	0.0849446	15.8764	1.38539	-4.86146	0.168217	0.942626	0.0256605
HIIE	Post exercise	CMC2	0.313962	15.0444	1.38408	-4.86307	0.168621	0.942626	0.0256605
HIIE	Post exercise	CNP	-0.0686221	18.2233	-1.38741	-4.85898	0.167604	0.942626	0.0256605
HIIE	Post exercise	CPNE1	0.143303	19.1612	1.39865	-4.84509	0.164215	0.942626	0.0256605
HIIE	Post exercise	DGKZ	0.0948657	14.4099	1.38988	-4.85594	0.166855	0.942626	0.0256605
HIIE	Post exercise	GDI1	-0.075992	19.6024	-1.39815	-4.84571	0.16436	0.942626	0.0256605
HIIE	Post exercise	HDGFL2	0.140503	14.7551	1.39884	-4.84486	0.164158	0.942626	0.0256605
HIIE	Post exercise	IFIT1	-0.211878	12.0069	-1.38421	-4.86291	0.168582	0.942626	0.0256605
HIIE	Post exercise	IRAK1	0.231114	11.7332	1.38571	-4.86108	0.168125	0.942626	0.0256605
HIIE	Post exercise	KNG1	-0.134185	16.8848	-1.38983	-4.856	0.166873	0.942626	0.0256605
HIIE	Post exercise	LCN2	0.531452	15.5085	1.39548	-4.84902	0.165165	0.942626	0.0256605
HIIE	Post exercise	LIPA	-0.115201	16.6432	-1.3801	-4.86795	0.16984	0.942626	0.0256605
HIIE	Post exercise	MED20	0.18201	13.1734	1.38742	-4.85897	0.167604	0.942626	0.0256605
HIIE	Post exercise	MPDU1	-0.105605	19.0873	-1.3922	-4.85308	0.166156	0.942626	0.0256605
HIIE	Post exercise	MTRES1	-0.174709	14.7328	-1.39376	-4.85115	0.165684	0.942626	0.0256605
HIIE	Post exercise	NID1	-0.154756	19.8224	-1.3959	-4.84851	0.165041	0.942626	0.0256605
HIIE	Post exercise	NUTF2	0.184534	17.0806	1.39572	-4.84873	0.165095	0.942626	0.0256605
HIIE	Post exercise	RAB3A	0.292507	13.0379	1.38436	-4.86274	0.168537	0.942626	0.0256605
HIIE	Post exercise	RARS2	-0.135433	13.4388	-1.39156	-4.85386	0.166344	0.942626	0.0256605
HIIE	Post exercise	RMND5A	-0.239492	14.5363	-1.38928	-4.85667	0.167038	0.942626	0.0256605
HIIE	Post exercise	RRP15	0.254837	13.4016	1.39747	-4.84656	0.164569	0.942626	0.0256605
HIIE	Post exercise	SH2D3C	0.145895	14.1691	1.38023	-4.8678	0.169802	0.942626	0.0256605
HIIE	Post exercise	SHTN1	-0.164306	14.077	-1.38274	-4.86472	0.169031	0.942626	0.0256605
HIIE	Post exercise	SLC30A6	-0.116386	14.8704	-1.38507	-4.86186	0.168318	0.942626	0.0256605
HIIE	Post exercise	SLC39A7	-0.0783074	14.9563	-1.37963	-4.86853	0.169982	0.942626	0.0256605
HIIE	Post exercise	SMS	0.0813402	16.7358	1.38486	-4.86211	0.16838	0.942626	0.0256605
HIIE	Post exercise	STARD7	0.155628	13.8985	1.39568	-4.84877	0.165106	0.942626	0.0256605
HIIE	Post exercise	SUGT1	0.0590919	17.3833	1.39532	-4.84922	0.165211	0.942626	0.0256605
HIIE	Post exercise	TGFB1	-0.148448	20.2343	-1.3904	-4.85529	0.166699	0.942626	0.0256605
HIIE	Post exercise	THAP12	-0.405991	12.9235	-1.38931	-4.85665	0.167031	0.942626	0.0256605
HIIE	Post exercise	TPT1	-0.159757	16.5936	-1.38056	-4.8674	0.169701	0.942626	0.0256605
HIIE	Post exercise	TRIP13	-0.11347	14.3808	-1.38353	-4.86375	0.168787	0.942626	0.0256605
HIIE	Post exercise	TTR	-0.211259	15.8418	-1.38143	-4.86633	0.169434	0.942626	0.0256605
HIIE	Post exercise	TXNRD1	-0.0900887	16.6649	-1.39318	-4.85187	0.165857	0.942626	0.0256605
HIIE	Post exercise	UNC93B1	-0.227146	13.3299	-1.38779	-4.85851	0.167491	0.942626	0.0256605
HIIE	Post exercise	VPS26A	-0.14422	16.6944	-1.38193	-4.86571	0.16928	0.942626	0.0256605
HIIE	Post exercise	ZNF318	0.237676	12.2692	1.39505	-4.84955	0.165294	0.942626	0.0256605
HIIE	Post exercise	KDELR2	-0.148215	12.8892	-1.37874	-4.86962	0.170257	0.942971	0.0255016
HIIE	Post exercise	SNX29	-0.179735	13.6513	-1.37842	-4.87001	0.170356	0.942971	0.0255016
HIIE	Post exercise	DCK	0.153362	16.0079	1.37699	-4.87177	0.1708	0.943697	0.0251675
HIIE	Post exercise	WDR45B	-0.149773	14.1704	-1.3774	-4.87126	0.170672	0.943697	0.0251675
HIIE	Post exercise	FECH	0.0819797	14.9324	1.37605	-4.87291	0.171085	0.944409	0.0248397
HIIE	Post exercise	COG8	-0.0555664	14.3311	-1.37351	-4.87601	0.171872	0.947022	0.02364
HIIE	Post exercise	SRRM2	0.211089	13.1828	1.37368	-4.8758	0.171821	0.947022	0.02364
HIIE	Post exercise	PLCB3	-0.0910291	17.1569	-1.37262	-4.87709	0.172147	0.947672	0.0233418
HIIE	Post exercise	F9	0.202626	14.9739	1.37199	-4.87786	0.172347	0.947908	0.023234
HIIE	Post exercise	LETM1	-0.0596557	16.4392	-1.3704	-4.87979	0.172838	0.949742	0.0223942
HIIE	Post exercise	ATG9A	-0.117077	15.6217	-1.36812	-4.88256	0.173551	0.951919	0.0214002
HIIE	Post exercise	BLOC1S2	0.197095	14.0455	1.3667	-4.88428	0.173994	0.951919	0.0214002
HIIE	Post exercise	EXOC6	-0.105821	13.5909	-1.36769	-4.88309	0.173683	0.951919	0.0214002
HIIE	Post exercise	NUP107	0.126169	16.5278	1.36597	-4.88518	0.174225	0.951919	0.0214002
HIIE	Post exercise	SRA1	-0.248169	12.633	-1.36698	-4.88395	0.173908	0.951919	0.0214002
HIIE	Post exercise	TRIM4	-0.0720021	16.2886	-1.3656	-4.88562	0.174337	0.951919	0.0214002
HIIE	Post exercise	ZFYVE21	-0.190057	15.1244	-1.36615	-4.88496	0.174168	0.951919	0.0214002
HIIE	Post exercise	CST3	-0.204976	16.36	-1.36462	-4.8868	0.174646	0.952742	0.0210249
HIIE	Post exercise	AATF	0.21826	12.3137	1.3602	-4.89215	0.176036	0.954269	0.0203292
HIIE	Post exercise	ATP11B	-0.0766685	16.635	-1.36	-4.8924	0.176098	0.954269	0.0203292
HIIE	Post exercise	C1GALT1C1	-0.125207	13.784	-1.35943	-4.89308	0.176279	0.954269	0.0203292
HIIE	Post exercise	CAMKK2	-0.123774	13.074	-1.35996	-4.89244	0.176111	0.954269	0.0203292
HIIE	Post exercise	DENR	-0.0838296	16.8495	-1.35921	-4.89335	0.176348	0.954269	0.0203292
HIIE	Post exercise	FARSB	0.0685513	17.5753	1.36005	-4.89234	0.176082	0.954269	0.0203292
HIIE	Post exercise	MKNK1	-0.109136	13.6448	-1.3629	-4.88889	0.175184	0.954269	0.0203292
HIIE	Post exercise	MYLK	-0.106021	20.544	-1.35984	-4.89259	0.176153	0.954269	0.0203292
HIIE	Post exercise	RUNX3	0.241595	13.9768	1.36262	-4.88922	0.175274	0.954269	0.0203292
HIIE	Post exercise	CTSH	-0.200165	15.4734	-1.35791	-4.89491	0.176761	0.954793	0.0200909
HIIE	Post exercise	MRPS23	-0.100784	15.7661	-1.35835	-4.89439	0.176621	0.954793	0.0200909
HIIE	Post exercise	ADCK5	-0.156075	11.103	-1.35413	-4.89946	0.177957	0.95532	0.0198512
HIIE	Post exercise	ANKRD44	0.164584	16.0184	1.35384	-4.89981	0.178054	0.95532	0.0198512
HIIE	Post exercise	APOD	0.164335	16.4848	1.35689	-4.89615	0.177085	0.95532	0.0198512
HIIE	Post exercise	ARFGAP2	-0.0620622	15.7341	-1.35452	-4.899	0.177835	0.95532	0.0198512
HIIE	Post exercise	DCTN4	-0.0529779	16.9489	-1.35444	-4.89909	0.177859	0.95532	0.0198512
HIIE	Post exercise	L2HGDH	-0.0801735	15.9249	-1.3543	-4.89926	0.177903	0.95532	0.0198512
HIIE	Post exercise	MLYCD	-0.0845162	15.73	-1.35361	-4.90009	0.178124	0.95532	0.0198512
HIIE	Post exercise	NCOR2	-0.145515	13.0206	-1.3554	-4.89794	0.177556	0.95532	0.0198512
HIIE	Post exercise	BIRC2	0.112762	12.9198	1.35172	-4.90236	0.178727	0.955389	0.0198197
HIIE	Post exercise	C8A	-0.213708	13.5401	-1.35159	-4.90251	0.17877	0.955389	0.0198197
HIIE	Post exercise	FYN	-0.0616671	20.9878	-1.35187	-4.90218	0.178678	0.955389	0.0198197
HIIE	Post exercise	SLC4A1	-0.446687	16.5936	-1.35227	-4.90169	0.178552	0.955389	0.0198197
HIIE	Post exercise	COQ6	0.144282	18.5478	1.34881	-4.90585	0.17966	0.955599	0.0197244
HIIE	Post exercise	DNPEP	0.151466	17.5244	1.34812	-4.90668	0.179882	0.955599	0.0197244
HIIE	Post exercise	HMGB3	-0.22305	17.0076	-1.34861	-4.90609	0.179725	0.955599	0.0197244
HIIE	Post exercise	IL6ST	-0.146504	14.2995	-1.34959	-4.90491	0.179411	0.955599	0.0197244
HIIE	Post exercise	PDHB	0.176815	18.2869	1.35056	-4.90375	0.179098	0.955599	0.0197244
HIIE	Post exercise	TMIGD2	0.18526	14.1938	1.35043	-4.90391	0.179143	0.955599	0.0197244
HIIE	Post exercise	UQCRH	0.282544	13.6413	1.34801	-4.9068	0.179917	0.955599	0.0197244
HIIE	Post exercise	ADCY7	-0.181448	12.6455	-1.3463	-4.90885	0.180466	0.95587	0.0196012
HIIE	Post exercise	BPI	0.427673	14.4677	1.34588	-4.90935	0.180601	0.95587	0.0196012
HIIE	Post exercise	INPP5A	-0.107739	17.1822	-1.34698	-4.90804	0.180247	0.95587	0.0196012
HIIE	Post exercise	MYADM	-0.250046	19.3763	-1.34654	-4.90857	0.18039	0.95587	0.0196012
HIIE	Post exercise	CCAR2	0.145993	15.8943	1.34522	-4.91014	0.180812	0.95615	0.0194738
HIIE	Post exercise	POR	-0.0976864	15.8886	-1.34283	-4.91299	0.181583	0.956875	0.0191446
HIIE	Post exercise	RMDN3	0.0917987	15.9361	1.34341	-4.91231	0.181396	0.956875	0.0191446
HIIE	Post exercise	TOX4	0.120345	13.9041	1.34284	-4.91299	0.18158	0.956875	0.0191446
HIIE	Post exercise	TXN2	0.1596	13.1052	1.34314	-4.91262	0.181484	0.956875	0.0191446
HIIE	Post exercise	PPP6R1	0.154493	14.8718	1.34124	-4.91488	0.182097	0.957914	0.0186735
HIIE	Post exercise	TMED9	-0.10153	18.4966	-1.3414	-4.91469	0.182045	0.957914	0.0186735
HIIE	Post exercise	H1-3	-0.194177	22.228	-1.34037	-4.91592	0.182379	0.958561	0.0183803
HIIE	Post exercise	CPNE2	0.14867	15.9625	1.33862	-4.918	0.182947	0.959502	0.0179539
HIIE	Post exercise	CYBRD1	-0.154019	14.9444	-1.33695	-4.91999	0.183493	0.959502	0.0179539
HIIE	Post exercise	DDX60	0.105613	14.1702	1.3373	-4.91957	0.183373	0.959502	0.0179539
HIIE	Post exercise	DERL2	-0.219833	14.9631	-1.33813	-4.91859	0.183108	0.959502	0.0179539
HIIE	Post exercise	HDLBP	-0.0669506	16.0515	-1.33878	-4.91782	0.182894	0.959502	0.0179539
HIIE	Post exercise	MGST1	-0.224214	16.1247	-1.33689	-4.92006	0.183511	0.959502	0.0179539
HIIE	Post exercise	ATP5MK	-0.0746048	18.5904	-1.33526	-4.922	0.184039	0.960622	0.0174475
HIIE	Post exercise	SAMD14	-0.155846	13.7544	-1.33526	-4.922	0.184044	0.960622	0.0174475
HIIE	Post exercise	RPL7A	0.155809	18.9689	1.33405	-4.92343	0.184439	0.961067	0.0172464
HIIE	Post exercise	ZFAND1	-0.0976474	15.9051	-1.33401	-4.92347	0.184447	0.961067	0.0172464
HIIE	Post exercise	RIGI	0.132113	14.4217	1.33295	-4.92474	0.184799	0.961239	0.0171684
HIIE	Post exercise	SERPINB1	0.224479	17.9538	1.33335	-4.92425	0.184665	0.961239	0.0171684
HIIE	Post exercise	ATP6V0A2	-0.0893861	15.4601	-1.33066	-4.92744	0.185545	0.96211	0.0167752
HIIE	Post exercise	C4A	-0.111696	17.9342	-1.33001	-4.92821	0.185763	0.96211	0.0167752
HIIE	Post exercise	CD40LG	-0.119873	16.7565	-1.33019	-4.928	0.185704	0.96211	0.0167752
HIIE	Post exercise	TMEM70	-0.108653	13.7253	-1.33051	-4.92761	0.185592	0.96211	0.0167752
HIIE	Post exercise	UBE2A	-0.173115	14.6906	-1.33118	-4.92682	0.185377	0.96211	0.0167752
HIIE	Post exercise	MANF	0.151738	19.0183	1.32902	-4.92937	0.186086	0.962135	0.0167639
HIIE	Post exercise	SMN2	0.138039	14.072	1.32913	-4.92924	0.186049	0.962135	0.0167639
HIIE	Post exercise	HSD17B4	-0.0797567	20.5669	-1.32853	-4.92996	0.186246	0.96214	0.0167616
HIIE	Post exercise	CDK9	0.153871	15.0997	1.32754	-4.93112	0.186573	0.962182	0.0167427
HIIE	Post exercise	COA3	-0.135848	16.1299	-1.32801	-4.93057	0.186419	0.962182	0.0167427
HIIE	Post exercise	ENO1	-0.0783311	23.4416	-1.32698	-4.93179	0.186757	0.96231	0.0166852
HIIE	Post exercise	TPCN1	-0.117309	13.752	-1.32518	-4.9339	0.18735	0.964543	0.0156782
HIIE	Post exercise	CDK16	0.1302	13.09	1.32461	-4.93457	0.187538	0.964689	0.0156127
HIIE	Post exercise	MTDH	-0.0938314	18.6413	-1.32277	-4.93674	0.188152	0.966199	0.0149333
HIIE	Post exercise	NABP2	0.231456	11.4356	1.32311	-4.93634	0.18804	0.966199	0.0149333
HIIE	Post exercise	AASS	-0.101029	13.2553	-1.26374	-5.0046	0.208503	0.966222	0.014923
HIIE	Post exercise	ACOT7	-0.0830152	16.807	-1.31714	-4.94334	0.190023	0.966222	0.014923
HIIE	Post exercise	ACOX3	-0.0892921	14.3786	-1.26207	-5.00648	0.209102	0.966222	0.014923
HIIE	Post exercise	ACSL3	-0.0660992	17.2416	-1.29387	-4.97034	0.197922	0.966222	0.014923
HIIE	Post exercise	ACTA1	0.251507	18.4525	1.2626	-5.00588	0.208913	0.966222	0.014923
HIIE	Post exercise	ADRA2A	-0.130976	14.5631	-1.29152	-4.97304	0.198734	0.966222	0.014923
HIIE	Post exercise	AGTPBP1	-0.133227	14.4255	-1.29233	-4.9721	0.198453	0.966222	0.014923
HIIE	Post exercise	AKAP7	0.183191	13.4462	1.30913	-4.95268	0.192717	0.966222	0.014923
HIIE	Post exercise	ALG2	-0.0578275	15.3547	-1.28956	-4.97529	0.19941	0.966222	0.014923
HIIE	Post exercise	AOAH	-0.203368	14.3403	-1.28093	-4.98515	0.202419	0.966222	0.014923
HIIE	Post exercise	APOBEC3B	-0.190805	13.6549	-1.29472	-4.96935	0.197629	0.966222	0.014923
HIIE	Post exercise	APPL2	-0.105493	18.2759	-1.30871	-4.95317	0.192858	0.966222	0.014923
HIIE	Post exercise	ARHGAP17	0.131658	15.6222	1.30408	-4.95855	0.194431	0.966222	0.014923
HIIE	Post exercise	ATXN2L	0.125392	14.0237	1.27204	-4.99524	0.205549	0.966222	0.014923
HIIE	Post exercise	BCKDK	-0.122674	15.6081	-1.28739	-4.97777	0.200166	0.966222	0.014923
HIIE	Post exercise	C5AR1	-0.230367	14.4561	-1.30569	-4.95669	0.193884	0.966222	0.014923
HIIE	Post exercise	C6orf120	-0.153352	13.636	-1.2863	-4.97902	0.200545	0.966222	0.014923
HIIE	Post exercise	CASP8	0.0984477	12.4406	1.31965	-4.9404	0.189186	0.966222	0.014923
HIIE	Post exercise	CBR4	-0.088607	15.8228	-1.27608	-4.99066	0.204118	0.966222	0.014923
HIIE	Post exercise	CD109	-0.132369	15.7391	-1.32124	-4.93854	0.188662	0.966222	0.014923
HIIE	Post exercise	CD37	0.211904	16.7161	1.26516	-5.003	0.207998	0.966222	0.014923
HIIE	Post exercise	CD59	0.275776	14.4955	1.28892	-4.97602	0.199635	0.966222	0.014923
HIIE	Post exercise	CDK19	0.0801866	13.2512	1.26904	-4.99863	0.206613	0.966222	0.014923
HIIE	Post exercise	CETN2	-0.174537	15.1535	-1.3118	-4.94957	0.191817	0.966222	0.014923
HIIE	Post exercise	CLTC	0.0815546	21.1469	1.2663	-5.00171	0.207586	0.966222	0.014923
HIIE	Post exercise	CNNM4	-0.105559	12.9795	-1.28258	-4.98327	0.201839	0.966222	0.014923
HIIE	Post exercise	CNPY3	-0.0828843	18.0332	-1.31009	-4.95157	0.192392	0.966222	0.014923
HIIE	Post exercise	COA1	-0.189489	13.1245	-1.2802	-4.98598	0.202675	0.966222	0.014923
HIIE	Post exercise	COG7	0.0810219	14.5379	1.29697	-4.96677	0.196856	0.966222	0.014923
HIIE	Post exercise	CSNK2B	0.0886951	17.0464	1.30675	-4.95546	0.193521	0.966222	0.014923
HIIE	Post exercise	CTBP1	0.12381	17.3375	1.28094	-4.98514	0.202415	0.966222	0.014923
HIIE	Post exercise	DCP1A	0.127658	14.0815	1.28091	-4.98517	0.202426	0.966222	0.014923
HIIE	Post exercise	DNAAF5	0.169071	12.2612	1.27408	-4.99293	0.204828	0.966222	0.014923
HIIE	Post exercise	DPYD	-0.109961	17.7201	-1.26944	-4.99817	0.20647	0.966222	0.014923
HIIE	Post exercise	DYNLL1	-0.119246	17.705	-1.2739	-4.99313	0.20489	0.966222	0.014923
HIIE	Post exercise	EGF	-0.128593	16.8471	-1.29611	-4.96776	0.197153	0.966222	0.014923
HIIE	Post exercise	ELMO2	0.126785	15.4521	1.30658	-4.95565	0.193581	0.966222	0.014923
HIIE	Post exercise	EML3	0.0533042	16.9075	1.29369	-4.97054	0.197981	0.966222	0.014923
HIIE	Post exercise	ERG28	-0.164467	15.4032	-1.28822	-4.97682	0.199878	0.966222	0.014923
HIIE	Post exercise	ERGIC1	-0.0629769	18.1009	-1.29318	-4.97113	0.198159	0.966222	0.014923
HIIE	Post exercise	FBP1	-0.204223	16.8217	-1.27276	-4.99442	0.205295	0.966222	0.014923
HIIE	Post exercise	FLOT1	0.153094	17.8668	1.28512	-4.98037	0.200955	0.966222	0.014923
HIIE	Post exercise	FOLR3	0.235427	13.3935	1.26466	-5.00357	0.208178	0.966222	0.014923
HIIE	Post exercise	FOXO1	0.210472	12.4411	1.30324	-4.95952	0.194715	0.966222	0.014923
HIIE	Post exercise	FOXRED1	-0.11843	14.4467	-1.31535	-4.94543	0.190624	0.966222	0.014923
HIIE	Post exercise	FSTL1	-0.172169	15.153	-1.27021	-4.9973	0.206198	0.966222	0.014923
HIIE	Post exercise	GAN	0.143487	13.8956	1.29274	-4.97164	0.198313	0.966222	0.014923
HIIE	Post exercise	GDAP2	-0.0950604	14.3047	-1.32097	-4.93885	0.188747	0.966222	0.014923
HIIE	Post exercise	GID8	0.180805	12.9912	1.3058	-4.95656	0.193847	0.966222	0.014923
HIIE	Post exercise	GNG2	0.185202	15.583	1.29663	-4.96716	0.196974	0.966222	0.014923
HIIE	Post exercise	GPAA1	-0.142385	15.1141	-1.27734	-4.98923	0.203679	0.966222	0.014923
HIIE	Post exercise	GRB10	-0.136059	13.1642	-1.30801	-4.95399	0.193096	0.966222	0.014923
HIIE	Post exercise	HADHA	-0.0574932	20.3436	-1.27661	-4.99006	0.203933	0.966222	0.014923
HIIE	Post exercise	HEXB	-0.104846	18.3324	-1.31054	-4.95104	0.192241	0.966222	0.014923
HIIE	Post exercise	HM13	-0.083095	18.2458	-1.29877	-4.96469	0.196236	0.966222	0.014923
HIIE	Post exercise	HNRNPK	0.0996011	18.8321	1.28394	-4.98172	0.201367	0.966222	0.014923
HIIE	Post exercise	HS2ST1	-0.0891419	15.357	-1.30205	-4.9609	0.195116	0.966222	0.014923
HIIE	Post exercise	HSPH1	0.0619489	17.1282	1.27891	-4.98744	0.203122	0.966222	0.014923
HIIE	Post exercise	IL18	-0.128176	15.4714	-1.28982	-4.97499	0.199323	0.966222	0.014923
HIIE	Post exercise	LANCL1	0.0787829	18.3743	1.26976	-4.99781	0.206355	0.966222	0.014923
HIIE	Post exercise	LENG1	0.173479	13.1712	1.29752	-4.96613	0.196669	0.966222	0.014923
HIIE	Post exercise	LOXL3	-0.162106	15.8261	-1.31537	-4.94541	0.190618	0.966222	0.014923
HIIE	Post exercise	MAP3K6	-0.158853	12.1704	-1.28714	-4.97806	0.200251	0.966222	0.014923
HIIE	Post exercise	MARCKS	-0.199123	15.0029	-1.27545	-4.99137	0.204343	0.966222	0.014923
HIIE	Post exercise	MDK	-0.17106	13.0145	-1.30604	-4.95628	0.193765	0.966222	0.014923
HIIE	Post exercise	ME2	-0.094392	20.1051	-1.27604	-4.9907	0.204135	0.966222	0.014923
HIIE	Post exercise	MGAT2	-0.0900583	16.7257	-1.3085	-4.95342	0.192929	0.966222	0.014923
HIIE	Post exercise	MLC1	-0.22212	14.491	-1.28359	-4.98211	0.201488	0.966222	0.014923
HIIE	Post exercise	MPEG1	-0.190937	14.5709	-1.27349	-4.99359	0.205036	0.966222	0.014923
HIIE	Post exercise	MRPL13	-0.0902834	14.7333	-1.26848	-4.99926	0.20681	0.966222	0.014923
HIIE	Post exercise	MRPS2	-0.122923	15.049	-1.28403	-4.98162	0.201335	0.966222	0.014923
HIIE	Post exercise	MRPS28	0.16612	15.1945	1.27841	-4.98801	0.203302	0.966222	0.014923
HIIE	Post exercise	MTMR6	-0.0729532	14.7914	-1.26969	-4.9979	0.20638	0.966222	0.014923
HIIE	Post exercise	MTRF1L	-0.182318	12.8064	-1.26655	-5.00144	0.207502	0.966222	0.014923
HIIE	Post exercise	MYDGF	-0.0758872	18.491	-1.27166	-4.99567	0.205682	0.966222	0.014923
HIIE	Post exercise	MYO1G	0.128367	17.3372	1.31135	-4.9501	0.191969	0.966222	0.014923
HIIE	Post exercise	NCSTN	-0.126637	17.1987	-1.26414	-5.00415	0.208363	0.966222	0.014923
HIIE	Post exercise	NDUFA5	0.102451	16.7706	1.2707	-4.99675	0.206025	0.966222	0.014923
HIIE	Post exercise	NDUFA7	0.167515	15.4475	1.3158	-4.94491	0.190476	0.966222	0.014923
HIIE	Post exercise	NOP9	-0.203939	14.3476	-1.29597	-4.96792	0.1972	0.966222	0.014923
HIIE	Post exercise	NUDT16	-0.0924837	16.1881	-1.30198	-4.96099	0.195144	0.966222	0.014923
HIIE	Post exercise	OLA1	-0.0639842	19.3132	-1.27848	-4.98794	0.203275	0.966222	0.014923
HIIE	Post exercise	P2RX1	-0.101076	18.7975	-1.29039	-4.97433	0.199123	0.966222	0.014923
HIIE	Post exercise	P4HA1	-0.0901553	13.5248	-1.32078	-4.93908	0.18881	0.966222	0.014923
HIIE	Post exercise	PADI2	-0.194129	14.8677	-1.27052	-4.99696	0.206089	0.966222	0.014923
HIIE	Post exercise	PBDC1	0.0719198	16.102	1.27246	-4.99476	0.205397	0.966222	0.014923
HIIE	Post exercise	PCOLCE	-0.180921	13.5479	-1.31439	-4.94656	0.190948	0.966222	0.014923
HIIE	Post exercise	PCYOX1	-0.11113	16.6656	-1.29769	-4.96594	0.196611	0.966222	0.014923
HIIE	Post exercise	PDIA4	-0.0540019	20.278	-1.26963	-4.99796	0.2064	0.966222	0.014923
HIIE	Post exercise	PFN1	-0.0703215	24.0337	-1.26937	-4.99825	0.206493	0.966222	0.014923
HIIE	Post exercise	PISD	-0.173675	12.6445	-1.2831	-4.98268	0.20166	0.966222	0.014923
HIIE	Post exercise	PLAUR	-0.281998	13.2169	-1.31805	-4.94227	0.189722	0.966222	0.014923
HIIE	Post exercise	PMPCB	-0.0640742	17.0689	-1.2721	-4.99517	0.205526	0.966222	0.014923
HIIE	Post exercise	POLR1E	-0.188186	13.424	-1.31205	-4.94928	0.191733	0.966222	0.014923
HIIE	Post exercise	PPCS	-0.0630915	18.147	-1.3153	-4.94549	0.190639	0.966222	0.014923
HIIE	Post exercise	PPP6R3	0.154752	15.7715	1.31302	-4.94816	0.191409	0.966222	0.014923
HIIE	Post exercise	PRKCD	-0.075237	18.3177	-1.29067	-4.97401	0.199025	0.966222	0.014923
HIIE	Post exercise	PRKCH	0.142779	16.1537	1.31738	-4.94306	0.189945	0.966222	0.014923
HIIE	Post exercise	PROS1	-0.124758	20.0175	-1.27802	-4.98846	0.20344	0.966222	0.014923
HIIE	Post exercise	PRSS1	-0.16854	15.1422	-1.28651	-4.97878	0.200471	0.966222	0.014923
HIIE	Post exercise	PSMC1	0.0905255	17.8615	1.28336	-4.98237	0.201566	0.966222	0.014923
HIIE	Post exercise	PTDSS2	-0.118573	15.7324	-1.30633	-4.95594	0.193665	0.966222	0.014923
HIIE	Post exercise	PTPRF	-0.148568	13.5442	-1.29006	-4.97471	0.199239	0.966222	0.014923
HIIE	Post exercise	RAB11A	-0.289929	13.7339	-1.28042	-4.98573	0.202596	0.966222	0.014923
HIIE	Post exercise	RAB11FIP1	0.194725	12.6873	1.31153	-4.94989	0.191907	0.966222	0.014923
HIIE	Post exercise	RAB27A	-0.070325	20.8386	-1.29395	-4.97024	0.197891	0.966222	0.014923
HIIE	Post exercise	RAB39A	-0.227871	15.5345	-1.26381	-5.00452	0.208481	0.966222	0.014923
HIIE	Post exercise	RNF13	-0.174968	15.6998	-1.27644	-4.99025	0.203995	0.966222	0.014923
HIIE	Post exercise	RSF1	0.190472	12.4642	1.29224	-4.97222	0.198487	0.966222	0.014923
HIIE	Post exercise	SDHB	-0.0902874	19.5119	-1.28587	-4.97951	0.200693	0.966222	0.014923
HIIE	Post exercise	SF3A3	0.166965	16.1251	1.30877	-4.9531	0.192839	0.966222	0.014923
HIIE	Post exercise	SLA	0.097105	14.318	1.26158	-5.00702	0.209276	0.966222	0.014923
HIIE	Post exercise	SLA2	-0.115563	16.2781	-1.28123	-4.9848	0.202313	0.966222	0.014923
HIIE	Post exercise	SLC17A5	-0.0850161	16.0561	-1.27512	-4.99175	0.204457	0.966222	0.014923
HIIE	Post exercise	SLC25A4	-0.0492864	21.5056	-1.26501	-5.00317	0.208047	0.966222	0.014923
HIIE	Post exercise	SPCS3	-0.101558	18.672	-1.26355	-5.00481	0.208572	0.966222	0.014923
HIIE	Post exercise	STARD3	0.167519	12.9031	1.29143	-4.97314	0.198766	0.966222	0.014923
HIIE	Post exercise	SYNGR1	-0.189583	14.9225	-1.26185	-5.00672	0.209181	0.966222	0.014923
HIIE	Post exercise	SYTL3	-0.284176	12.8751	-1.28513	-4.98036	0.200952	0.966222	0.014923
HIIE	Post exercise	TASP1	0.263005	12.094	1.29424	-4.96991	0.197795	0.966222	0.014923
HIIE	Post exercise	TATDN1	-0.129749	15.033	-1.30222	-4.9607	0.195061	0.966222	0.014923
HIIE	Post exercise	TBP	-0.23396	13.5197	-1.31159	-4.94982	0.191887	0.966222	0.014923
HIIE	Post exercise	TMC6	0.162969	13.4357	1.26302	-5.0054	0.208761	0.966222	0.014923
HIIE	Post exercise	TMCO1	-0.0741876	16.2471	-1.2941	-4.97008	0.197843	0.966222	0.014923
HIIE	Post exercise	TMEM101	-0.168554	13.2477	-1.2961	-4.96777	0.197157	0.966222	0.014923
HIIE	Post exercise	TRABD	-0.0915098	15.107	-1.30467	-4.95787	0.194226	0.966222	0.014923
HIIE	Post exercise	UBR3	-0.152296	12.6101	-1.30511	-4.95736	0.194079	0.966222	0.014923
HIIE	Post exercise	UGGT1	-0.0559261	19.4115	-1.31368	-4.94739	0.191183	0.966222	0.014923
HIIE	Post exercise	UNG	-0.161597	14.6407	-1.30291	-4.95991	0.194829	0.966222	0.014923
HIIE	Post exercise	VPS51	0.0768339	15.3822	1.26183	-5.00674	0.209185	0.966222	0.014923
HIIE	Post exercise	WDR44	-0.0960314	19.5053	-1.26998	-4.99757	0.206282	0.966222	0.014923
HIIE	Post exercise	WWP2	-0.138904	12.4326	-1.26673	-5.00124	0.207435	0.966222	0.014923
HIIE	Post exercise	LIMD1	0.152268	13.6409	1.26035	-5.00841	0.209723	0.967377	0.0144044
HIIE	Post exercise	SIGLEC9	-0.203065	13.9064	-1.25964	-5.0092	0.209977	0.967377	0.0144044
HIIE	Post exercise	WDR48	-0.0895773	14.4984	-1.25955	-5.0093	0.210007	0.967377	0.0144044
HIIE	Post exercise	ARID3A	-0.193025	12.3503	-1.25352	-5.01604	0.212188	0.972724	0.0120103
HIIE	Post exercise	DPY19L3	-0.0930876	13.6231	-1.25433	-5.01514	0.211891	0.972724	0.0120103
HIIE	Post exercise	MED4	0.198285	11.6977	1.25479	-5.01463	0.211728	0.972724	0.0120103
HIIE	Post exercise	MFSD10	-0.149336	16.0994	-1.25564	-5.01368	0.211421	0.972724	0.0120103
HIIE	Post exercise	OSBPL9	-0.0962659	14.4155	-1.2535	-5.01606	0.212189	0.972724	0.0120103
HIIE	Post exercise	PASK	-0.0619297	16.1621	-1.25321	-5.01639	0.212296	0.972724	0.0120103
HIIE	Post exercise	PPP1R3D	0.106965	15.0516	1.25411	-5.01538	0.211974	0.972724	0.0120103
HIIE	Post exercise	PQBP1	-0.186949	16.3685	-1.25268	-5.01697	0.21249	0.972724	0.0120103
HIIE	Post exercise	TRANK1	0.202507	11.9452	1.25233	-5.01736	0.212617	0.972724	0.0120103
HIIE	Post exercise	PSMD11	0.0791273	17.3121	1.25185	-5.0179	0.212789	0.972771	0.0119894
HIIE	Post exercise	AP1S2	-0.0729736	18.6214	-1.24925	-5.02079	0.213735	0.973414	0.0117025
HIIE	Post exercise	CRBN	0.0864772	16.1862	1.24961	-5.0204	0.213606	0.973414	0.0117025
HIIE	Post exercise	MSI2	0.0961596	15.8707	1.24938	-5.02065	0.213692	0.973414	0.0117025
HIIE	Post exercise	NARS1	-0.0671719	18.1572	-1.24984	-5.02014	0.213521	0.973414	0.0117025
HIIE	Post exercise	UBA3	0.0812865	16.7884	1.25023	-5.0197	0.213379	0.973414	0.0117025
HIIE	Post exercise	AFP	0.220693	15.7036	1.24686	-5.02345	0.214613	0.973528	0.0116516
HIIE	Post exercise	CCT2	0.110963	17.874	1.24654	-5.0238	0.214727	0.973528	0.0116516
HIIE	Post exercise	CCT4	0.067913	19.5066	1.24726	-5.02301	0.214464	0.973528	0.0116516
HIIE	Post exercise	PLEKHA2	0.11026	14.472	1.24746	-5.02278	0.21439	0.973528	0.0116516
HIIE	Post exercise	TRMT1	0.208523	12.2816	1.24762	-5.0226	0.214333	0.973528	0.0116516
HIIE	Post exercise	USP34	0.109653	12.3884	1.24732	-5.02293	0.214439	0.973528	0.0116516
HIIE	Post exercise	SLC16A7	-0.113922	14.8788	-1.24591	-5.0245	0.214958	0.973844	0.0115106
HIIE	Post exercise	ZNF830	-0.201986	13.3131	-1.24466	-5.02588	0.215417	0.975188	0.0109118
HIIE	Post exercise	CHMP6	-0.116406	16.6991	-1.24411	-5.02649	0.215619	0.975373	0.0108295
HIIE	Post exercise	ASPSCR1	0.08804	14.3405	1.24154	-5.02934	0.216561	0.978167	0.00958701
HIIE	Post exercise	NUP210	0.230325	17.9456	1.24181	-5.02904	0.216465	0.978167	0.00958701
HIIE	Post exercise	ACSS1	-0.0768708	17.8926	-1.24027	-5.03074	0.217029	0.979023	0.0092072
HIIE	Post exercise	SAMD9L	-0.144137	13.4461	-1.24015	-5.03087	0.217074	0.979023	0.0092072
HIIE	Post exercise	PDCD6	0.178179	17.3588	1.23942	-5.03168	0.217346	0.979515	0.00898869
HIIE	Post exercise	NOP10	-0.250359	14.336	-1.23879	-5.03237	0.217576	0.979821	0.00885331
HIIE	Post exercise	ASMTL	0.107756	15.3463	1.22215	-5.05059	0.223783	0.980305	0.00863879
HIIE	Post exercise	CENPV	0.151871	14.9932	1.23034	-5.04165	0.220713	0.980305	0.00863879
HIIE	Post exercise	CLPB	-0.0757838	15.9161	-1.21929	-5.05371	0.224862	0.980305	0.00863879
HIIE	Post exercise	CSTF2T	-0.234009	11.7101	-1.22002	-5.05291	0.224588	0.980305	0.00863879
HIIE	Post exercise	CX3CR1	0.126731	12.9204	1.22134	-5.05147	0.224085	0.980305	0.00863879
HIIE	Post exercise	DEGS1	-0.168199	13.8909	-1.21544	-5.05788	0.226324	0.980305	0.00863879
HIIE	Post exercise	DYNC1LI1	0.0752504	16.9	1.23019	-5.04182	0.220767	0.980305	0.00863879
HIIE	Post exercise	EMC7	-0.116084	15.8812	-1.21684	-5.05636	0.225792	0.980305	0.00863879
HIIE	Post exercise	FAM3C	-0.128872	15.6595	-1.21795	-5.05516	0.225372	0.980305	0.00863879
HIIE	Post exercise	FBXO4	-0.148595	14.5095	-1.22616	-5.04622	0.222277	0.980305	0.00863879
HIIE	Post exercise	FCHO1	-0.183267	13.3537	-1.22197	-5.05079	0.223851	0.980305	0.00863879
HIIE	Post exercise	FLYWCH2	0.160873	15.1226	1.22442	-5.04813	0.222931	0.980305	0.00863879
HIIE	Post exercise	FUT8	-0.140502	16.7015	-1.21969	-5.05327	0.224712	0.980305	0.00863879
HIIE	Post exercise	GPCPD1	-0.0601809	14.7246	-1.22061	-5.05227	0.224363	0.980305	0.00863879
HIIE	Post exercise	IFI35	0.0977417	16.1926	1.21745	-5.0557	0.22556	0.980305	0.00863879
HIIE	Post exercise	IRF9	0.227387	13.3744	1.22496	-5.04753	0.222727	0.980305	0.00863879
HIIE	Post exercise	ITSN1	0.149046	13.6523	1.2161	-5.05717	0.226074	0.980305	0.00863879
HIIE	Post exercise	KIAA0930	-0.0904268	14.6229	-1.22438	-5.04817	0.222942	0.980305	0.00863879
HIIE	Post exercise	LRCH1	0.0662471	15.9191	1.21922	-5.05377	0.224886	0.980305	0.00863879
HIIE	Post exercise	LUZP1	0.146401	13.6514	1.22631	-5.04606	0.222222	0.980305	0.00863879
HIIE	Post exercise	MAP4K5	0.0783605	14.5759	1.22902	-5.0431	0.221202	0.980305	0.00863879
HIIE	Post exercise	MRPL39	-0.0948486	15.2834	-1.22868	-5.04347	0.22133	0.980305	0.00863879
HIIE	Post exercise	MRPL9	-0.121677	15.4196	-1.22854	-5.04362	0.221385	0.980305	0.00863879
HIIE	Post exercise	NADK	-0.159543	15.9104	-1.23516	-5.03637	0.21892	0.980305	0.00863879
HIIE	Post exercise	NEMF	-0.0844439	15.183	-1.22817	-5.04403	0.221519	0.980305	0.00863879
HIIE	Post exercise	NT5C2	-0.0694935	17.0612	-1.23643	-5.03497	0.218446	0.980305	0.00863879
HIIE	Post exercise	PHF14	0.165314	13.7169	1.21916	-5.05385	0.224915	0.980305	0.00863879
HIIE	Post exercise	PLCG1	0.164359	13.864	1.22672	-5.04562	0.222068	0.980305	0.00863879
HIIE	Post exercise	PLXNB2	-0.0797737	16.9484	-1.21811	-5.05498	0.225308	0.980305	0.00863879
HIIE	Post exercise	POLA1	-0.152868	16.9746	-1.22712	-5.04517	0.221916	0.980305	0.00863879
HIIE	Post exercise	PPP3CC	0.0836366	14.6744	1.21818	-5.05491	0.225282	0.980305	0.00863879
HIIE	Post exercise	RAB33B	-0.0799618	16.233	-1.2151	-5.05824	0.226449	0.980305	0.00863879
HIIE	Post exercise	RIC8A	0.0885032	15.701	1.23259	-5.03919	0.219872	0.980305	0.00863879
HIIE	Post exercise	RNF169	0.177296	12.3481	1.23327	-5.03844	0.219622	0.980305	0.00863879
HIIE	Post exercise	RXRA	0.21789	12.5973	1.23616	-5.03526	0.218548	0.980305	0.00863879
HIIE	Post exercise	SCYL3	0.142374	12.8638	1.22815	-5.04405	0.221529	0.980305	0.00863879
HIIE	Post exercise	SEH1L	-0.106355	15.4388	-1.23764	-5.03364	0.218001	0.980305	0.00863879
HIIE	Post exercise	SERPING1	-0.124263	16.1663	-1.2223	-5.05043	0.223728	0.980305	0.00863879
HIIE	Post exercise	SETD3	-0.0867496	14.7342	-1.22489	-5.04761	0.222749	0.980305	0.00863879
HIIE	Post exercise	SLC12A7	-0.247578	12.4613	-1.21581	-5.05747	0.226183	0.980305	0.00863879
HIIE	Post exercise	SLC30A5	0.123249	13.5296	1.22324	-5.04941	0.223373	0.980305	0.00863879
HIIE	Post exercise	SLC35E1	-0.135141	15.4967	-1.22561	-5.04683	0.222483	0.980305	0.00863879
HIIE	Post exercise	SNRPB	-0.181496	18.77	-1.21781	-5.05531	0.225426	0.980305	0.00863879
HIIE	Post exercise	SRI	0.104943	17.8456	1.23023	-5.04177	0.220753	0.980305	0.00863879
HIIE	Post exercise	TADA2B	-0.216686	14.8975	-1.21612	-5.05714	0.226065	0.980305	0.00863879
HIIE	Post exercise	TEX2	-0.102519	14.8643	-1.2332	-5.03852	0.219648	0.980305	0.00863879
HIIE	Post exercise	TOR1B	-0.0929754	13.9108	-1.22513	-5.04735	0.222661	0.980305	0.00863879
HIIE	Post exercise	TRAPPC2L	-0.078447	15.8162	-1.21553	-5.05778	0.226288	0.980305	0.00863879
HIIE	Post exercise	TTLL12	0.1326	16.0964	1.23111	-5.04081	0.220426	0.980305	0.00863879
HIIE	Post exercise	VPS8	0.0693948	14.187	1.22379	-5.04881	0.223165	0.980305	0.00863879
HIIE	Post exercise	WASF3	-0.239905	15.2847	-1.21819	-5.0549	0.225281	0.980305	0.00863879
HIIE	Post exercise	XPNPEP1	-0.0499447	18.0464	-1.21747	-5.05568	0.22555	0.980305	0.00863879
HIIE	Post exercise	YWHAQ	0.0962175	18.7012	1.2231	-5.04956	0.223426	0.980305	0.00863879
HIIE	Post exercise	ZNF185	-0.161186	13.392	-1.21757	-5.05557	0.225516	0.980305	0.00863879
HIIE	Post exercise	CPEB2	-0.0955473	13.2369	-1.21317	-5.06033	0.227184	0.982781	0.00754315
HIIE	Post exercise	IARS1	0.0690769	16.975	1.2127	-5.06084	0.227364	0.982856	0.00751014
HIIE	Post exercise	ARL2	-0.0868178	15.9435	-1.21035	-5.06338	0.228263	0.982998	0.00744751
HIIE	Post exercise	BORCS6	0.0997886	14.4803	1.2069	-5.06709	0.229584	0.982998	0.00744751
HIIE	Post exercise	CTSA	-0.0846745	19.1488	-1.20589	-5.06817	0.22997	0.982998	0.00744751
HIIE	Post exercise	DLGAP4	-0.104582	15.6181	-1.2042	-5.06998	0.230624	0.982998	0.00744751
HIIE	Post exercise	EED	-0.162482	13.7761	-1.20289	-5.07139	0.231128	0.982998	0.00744751
HIIE	Post exercise	EIF3D	-0.0700909	18.6132	-1.20265	-5.07164	0.231216	0.982998	0.00744751
HIIE	Post exercise	FLNC	0.0854653	19.0301	1.20322	-5.07104	0.231	0.982998	0.00744751
HIIE	Post exercise	FYTTD1	-0.153618	14.4681	-1.20846	-5.06541	0.228988	0.982998	0.00744751
HIIE	Post exercise	GALNS	-0.275504	14.0453	-1.20411	-5.07008	0.230659	0.982998	0.00744751
HIIE	Post exercise	GSS	-0.0666397	18.9912	-1.20422	-5.06997	0.230613	0.982998	0.00744751
HIIE	Post exercise	H1-5	-0.195377	22.5412	-1.20706	-5.06692	0.229525	0.982998	0.00744751
HIIE	Post exercise	HEBP1	-0.102901	16.1613	-1.21063	-5.06307	0.228158	0.982998	0.00744751
HIIE	Post exercise	HK3	-0.141876	16.4947	-1.20488	-5.06925	0.230359	0.982998	0.00744751
HIIE	Post exercise	IGKC	-0.1426	19.639	-1.20725	-5.0667	0.229449	0.982998	0.00744751
HIIE	Post exercise	ODR4	-0.0755622	14.7561	-1.20515	-5.06897	0.230256	0.982998	0.00744751
HIIE	Post exercise	PGP	0.0694157	16.9174	1.20778	-5.06614	0.229246	0.982998	0.00744751
HIIE	Post exercise	PITPNB	-0.0629662	17.4739	-1.20243	-5.07188	0.231303	0.982998	0.00744751
HIIE	Post exercise	PRKACB	-0.0596615	20.2527	-1.20374	-5.07048	0.230797	0.982998	0.00744751
HIIE	Post exercise	SNRPA	-0.171642	18.0491	-1.20677	-5.06722	0.229633	0.982998	0.00744751
HIIE	Post exercise	SUPT4H1	0.107871	15.6276	1.20969	-5.06408	0.228516	0.982998	0.00744751
HIIE	Post exercise	TMED10	-0.0565019	18.933	-1.21125	-5.0624	0.227914	0.982998	0.00744751
HIIE	Post exercise	TNXB	-0.16732	12.935	-1.21031	-5.06342	0.22828	0.982998	0.00744751
HIIE	Post exercise	TRAC	-0.194517	12.6937	-1.20462	-5.06953	0.23046	0.982998	0.00744751
HIIE	Post exercise	WASF2	0.200943	16.1101	1.21194	-5.06166	0.227656	0.982998	0.00744751
HIIE	Post exercise	REEP3	-0.204073	14.2232	-1.2015	-5.07287	0.231664	0.983837	0.0070768
HIIE	Post exercise	CNOT1	0.0582028	16.8015	1.19988	-5.07461	0.232287	0.985099	0.00651991
HIIE	Post exercise	UBASH3B	-0.0849713	18.6404	-1.20022	-5.07424	0.232158	0.985099	0.00651991
HIIE	Post exercise	GBP1	0.137318	16.472	1.19862	-5.07595	0.232777	0.985883	0.00617451
HIIE	Post exercise	PAFAH1B1	-0.0622208	18.357	-1.19856	-5.07602	0.232798	0.985883	0.00617451
HIIE	Post exercise	BRD4	0.177578	15.0049	1.19202	-5.08298	0.235347	0.98599	0.00612761
HIIE	Post exercise	CACYBP	-0.0753252	17.0876	-1.19276	-5.0822	0.235057	0.98599	0.00612761
HIIE	Post exercise	CCDC43	-0.133713	13.8328	-1.19361	-5.08129	0.234727	0.98599	0.00612761
HIIE	Post exercise	CCDC9	0.141263	14.5889	1.19305	-5.08189	0.234947	0.98599	0.00612761
HIIE	Post exercise	CCM2	0.0777871	14.5648	1.19153	-5.0835	0.235536	0.98599	0.00612761
HIIE	Post exercise	CENPC	-0.154186	14.9458	-1.19309	-5.08184	0.23493	0.98599	0.00612761
HIIE	Post exercise	ECHDC3	-0.275286	12.0703	-1.19096	-5.0841	0.235762	0.98599	0.00612761
HIIE	Post exercise	EEF1D	0.0859514	18.5941	1.19617	-5.07857	0.23373	0.98599	0.00612761
HIIE	Post exercise	FLCN	-0.108213	13.5535	-1.1962	-5.07854	0.233717	0.98599	0.00612761
HIIE	Post exercise	GNAQ	-0.106916	20.9518	-1.19323	-5.08169	0.234875	0.98599	0.00612761
HIIE	Post exercise	INPP1	0.171949	13.8431	1.19526	-5.07954	0.234086	0.98599	0.00612761
HIIE	Post exercise	LAMB1	-0.118483	15.4124	-1.19099	-5.08407	0.235749	0.98599	0.00612761
HIIE	Post exercise	MTMR3	0.187842	13.9761	1.19224	-5.08274	0.235261	0.98599	0.00612761
HIIE	Post exercise	PGM2L1	-0.0671844	16.2259	-1.19601	-5.07874	0.233791	0.98599	0.00612761
HIIE	Post exercise	PIK3CG	-0.0578942	15.9728	-1.19117	-5.08388	0.235678	0.98599	0.00612761
HIIE	Post exercise	RBCK1	0.0688302	15.0991	1.19253	-5.08244	0.235148	0.98599	0.00612761
HIIE	Post exercise	SEC61B	-0.0945276	17.9532	-1.19382	-5.08107	0.234647	0.98599	0.00612761
HIIE	Post exercise	SYNGR2	-0.129007	17.7277	-1.19681	-5.07789	0.233483	0.98599	0.00612761
HIIE	Post exercise	IFRD1	0.125278	12.3206	1.18791	-5.08734	0.236957	0.9867	0.0058147
HIIE	Post exercise	IPO9	0.107334	14.8468	1.1883	-5.08692	0.236805	0.9867	0.0058147
HIIE	Post exercise	NDUFA2	0.104573	17.655	1.18719	-5.08809	0.237239	0.9867	0.0058147
HIIE	Post exercise	RAC2	0.138808	21.2518	1.18925	-5.08592	0.236433	0.9867	0.0058147
HIIE	Post exercise	RCC1L	0.103511	13.4902	1.18744	-5.08784	0.237142	0.9867	0.0058147
HIIE	Post exercise	RETREG3	-0.117157	16.6739	-1.18989	-5.08524	0.236181	0.9867	0.0058147
HIIE	Post exercise	SYTL4	-0.105377	19.5681	-1.1892	-5.08598	0.236454	0.9867	0.0058147
HIIE	Post exercise	TM9SF3	-0.0454411	17.4498	-1.18873	-5.08647	0.236635	0.9867	0.0058147
HIIE	Post exercise	AP3B1	-0.0382382	18.3314	-1.18499	-5.09043	0.238106	0.98953	0.00457124
HIIE	Post exercise	ARHGEF10	0.135186	12.4605	1.17936	-5.09635	0.24033	0.98953	0.00457124
HIIE	Post exercise	BGN	0.179477	14.4569	1.1798	-5.09589	0.240157	0.98953	0.00457124
HIIE	Post exercise	CASP7	0.117307	14.6176	1.17978	-5.09591	0.240166	0.98953	0.00457124
HIIE	Post exercise	COG3	0.120106	13.0244	1.17554	-5.10036	0.241848	0.98953	0.00457124
HIIE	Post exercise	CTDP1	0.130098	13.0695	1.17964	-5.09606	0.24022	0.98953	0.00457124
HIIE	Post exercise	CTIF	-0.198044	11.3009	-1.18078	-5.09486	0.239771	0.98953	0.00457124
HIIE	Post exercise	DAD1	-0.0725224	19.0922	-1.17373	-5.10226	0.242571	0.98953	0.00457124
HIIE	Post exercise	DNAJC7	-0.0462978	15.4334	-1.18299	-5.09253	0.238891	0.98953	0.00457124
HIIE	Post exercise	EDC3	0.105042	14.0168	1.18239	-5.09317	0.239132	0.98953	0.00457124
HIIE	Post exercise	EXTL2	-0.171663	14.3244	-1.17383	-5.10215	0.242532	0.98953	0.00457124
HIIE	Post exercise	GALC	-0.162123	15.6103	-1.17144	-5.10465	0.243491	0.98953	0.00457124
HIIE	Post exercise	GCC2	0.144541	12.3966	1.17223	-5.10382	0.243172	0.98953	0.00457124
HIIE	Post exercise	GGCT	-0.0787986	17.2447	-1.18049	-5.09516	0.239881	0.98953	0.00457124
HIIE	Post exercise	H1-2	-0.170443	21.8142	-1.17655	-5.0993	0.241447	0.98953	0.00457124
HIIE	Post exercise	IGBP1	0.113346	14.1405	1.17783	-5.09796	0.240938	0.98953	0.00457124
HIIE	Post exercise	KYAT1	-0.139237	13.7384	-1.17533	-5.10058	0.241937	0.98953	0.00457124
HIIE	Post exercise	MAX	0.12979	15.0914	1.17594	-5.09994	0.241693	0.98953	0.00457124
HIIE	Post exercise	NDUFAF7	0.13129	12.6684	1.17718	-5.09864	0.241195	0.98953	0.00457124
HIIE	Post exercise	OGFRL1	-0.0654396	15.1214	-1.17143	-5.10465	0.243488	0.98953	0.00457124
HIIE	Post exercise	PARP4	0.103143	14.8914	1.1807	-5.09495	0.239803	0.98953	0.00457124
HIIE	Post exercise	PPCDC	0.142666	13.3894	1.17634	-5.09952	0.241532	0.98953	0.00457124
HIIE	Post exercise	PSTPIP2	-0.0986825	19.8974	-1.17329	-5.10271	0.242747	0.98953	0.00457124
HIIE	Post exercise	RAB1A	-0.0820698	19.0649	-1.174	-5.10197	0.242465	0.98953	0.00457124
HIIE	Post exercise	SLC44A1	-0.131473	15.8394	-1.17451	-5.10144	0.242264	0.98953	0.00457124
HIIE	Post exercise	SQLE	-0.410117	12.2011	-1.17187	-5.1042	0.243317	0.98953	0.00457124
HIIE	Post exercise	TARS1	-0.0614725	18.8804	-1.17669	-5.09915	0.241389	0.98953	0.00457124
HIIE	Post exercise	TMX2	0.101713	15.3015	1.1824	-5.09316	0.23913	0.98953	0.00457124
HIIE	Post exercise	UFC1	0.092464	17.7168	1.17874	-5.09701	0.24058	0.98953	0.00457124
HIIE	Post exercise	UFSP2	-0.0498238	14.2598	-1.18297	-5.09256	0.238902	0.98953	0.00457124
HIIE	Post exercise	VKORC1L1	-0.150057	18.0222	-1.17448	-5.10147	0.242274	0.98953	0.00457124
HIIE	Post exercise	WDR81	0.0646182	15.2945	1.1836	-5.09189	0.238654	0.98953	0.00457124
HIIE	Post exercise	YIPF6	-0.140411	15.1136	-1.17192	-5.10414	0.243295	0.98953	0.00457124
HIIE	Post exercise	ZNF622	0.143309	12.3721	1.18283	-5.0927	0.238958	0.98953	0.00457124
HIIE	Post exercise	KDM1A	-0.112544	14.4858	-1.16977	-5.10639	0.244159	0.991577	0.00367361
HIIE	Post exercise	PARP16	0.163022	13.1087	1.16917	-5.10701	0.244399	0.991884	0.00353907
HIIE	Post exercise	PEX3	-0.118387	14.4855	-1.16824	-5.10799	0.244774	0.992741	0.00316424
HIIE	Post exercise	HLA-C	0.264443	16.0059	1.1671	-5.10917	0.245231	0.993259	0.00293766
HIIE	Post exercise	MON1B	-0.0626513	14.7751	-1.16749	-5.10877	0.245073	0.993259	0.00293766
HIIE	Post exercise	PAOX	-0.101902	14.7071	-1.16655	-5.10974	0.245452	0.993488	0.00283759
HIIE	Post exercise	DDX19A	-0.0772015	16.6133	-1.16539	-5.11095	0.245918	0.993671	0.00275735
HIIE	Post exercise	ENG	-0.109747	17.0977	-1.1659	-5.11042	0.245715	0.993671	0.00275735
HIIE	Post exercise	TMX4	0.0931583	17.088	1.16521	-5.11113	0.245991	0.993671	0.00275735
HIIE	Post exercise	AAR2	-0.134845	13.7345	-1.15189	-5.12488	0.251405	0.994282	0.00249047
HIIE	Post exercise	ALDOA	-0.0619617	23.2851	-1.14147	-5.13554	0.255697	0.994282	0.00249047
HIIE	Post exercise	ANAPC1	0.0811491	13.5276	1.13427	-5.14285	0.258693	0.994282	0.00249047
HIIE	Post exercise	ANXA5	0.230608	20.575	1.13871	-5.13834	0.256843	0.994282	0.00249047
HIIE	Post exercise	ATG7	-0.0742122	15.7237	-1.15217	-5.1246	0.251289	0.994282	0.00249047
HIIE	Post exercise	ATP2B4	0.0920762	15.8641	1.14646	-5.13045	0.253637	0.994282	0.00249047
HIIE	Post exercise	ATP6V1G1	-0.106073	16.1469	-1.14765	-5.12923	0.253146	0.994282	0.00249047
HIIE	Post exercise	BAG2	0.0914016	15.2974	1.1382	-5.13886	0.257056	0.994282	0.00249047
HIIE	Post exercise	BDNF	-0.209453	15.7976	-1.14933	-5.12752	0.252457	0.994282	0.00249047
HIIE	Post exercise	BPHL	0.121518	14.61	1.13469	-5.14242	0.258521	0.994282	0.00249047
HIIE	Post exercise	BZW2	-0.0651106	17.0404	-1.1494	-5.12744	0.252424	0.994282	0.00249047
HIIE	Post exercise	CA2	-0.117251	21.74	-1.13918	-5.13787	0.25665	0.994282	0.00249047
HIIE	Post exercise	CCDC12	0.14955	14.2536	1.13511	-5.14199	0.258343	0.994282	0.00249047
HIIE	Post exercise	CD274	-0.147743	14.2673	-1.13881	-5.13824	0.256802	0.994282	0.00249047
HIIE	Post exercise	CDV3	-0.084624	16.7891	-1.14383	-5.13313	0.25472	0.994282	0.00249047
HIIE	Post exercise	CHD2	-0.149694	14.0579	-1.15991	-5.11662	0.248136	0.994282	0.00249047
HIIE	Post exercise	CLEC11A	-0.177223	14.6028	-1.13891	-5.13814	0.256761	0.994282	0.00249047
HIIE	Post exercise	CMTM6	-0.120833	17.6376	-1.13416	-5.14295	0.258741	0.994282	0.00249047
HIIE	Post exercise	DDX39A	0.174527	17.2201	1.14775	-5.12913	0.253106	0.994282	0.00249047
HIIE	Post exercise	DENND2C	-0.0928532	15.6195	-1.13348	-5.14364	0.259024	0.994282	0.00249047
HIIE	Post exercise	DNASE1	0.280083	12.3346	1.13578	-5.14131	0.258064	0.994282	0.00249047
HIIE	Post exercise	EIF4E	-0.123114	16.2794	-1.15197	-5.12481	0.251374	0.994282	0.00249047
HIIE	Post exercise	ELOA	0.142013	13.1014	1.15493	-5.12176	0.250161	0.994282	0.00249047
HIIE	Post exercise	EPS15L1	0.08833	17.8389	1.1519	-5.12487	0.251401	0.994282	0.00249047
HIIE	Post exercise	ETHE1	0.0826896	17.7505	1.16244	-5.114	0.247108	0.994282	0.00249047
HIIE	Post exercise	F8A1	0.130753	14.6118	1.14071	-5.13631	0.256015	0.994282	0.00249047
HIIE	Post exercise	FABP5	-0.128319	18.39	-1.14373	-5.13324	0.254765	0.994282	0.00249047
HIIE	Post exercise	FAM241A	-0.126631	13.8462	-1.14373	-5.13324	0.254765	0.994282	0.00249047
HIIE	Post exercise	FAM98C	0.157791	13.6414	1.14145	-5.13556	0.255707	0.994282	0.00249047
HIIE	Post exercise	FGA	-0.283004	24.5919	-1.14113	-5.13589	0.255841	0.994282	0.00249047
HIIE	Post exercise	FSCN1	-0.094975	15.4052	-1.13658	-5.14051	0.257732	0.994282	0.00249047
HIIE	Post exercise	GFPT1	0.0837176	15.7895	1.14029	-5.13673	0.256185	0.994282	0.00249047
HIIE	Post exercise	GSPT2	-0.121929	16.916	-1.14215	-5.13485	0.255418	0.994282	0.00249047
HIIE	Post exercise	GTF2A2	-0.1828	13.6944	-1.15473	-5.12196	0.250242	0.994282	0.00249047
HIIE	Post exercise	H1-1	-0.235351	17.4621	-1.15728	-5.11934	0.249204	0.994282	0.00249047
HIIE	Post exercise	H2BC20P	-0.240946	18.7089	-1.13486	-5.14225	0.25845	0.994282	0.00249047
HIIE	Post exercise	HMGN2	0.235321	15.9208	1.13698	-5.1401	0.257563	0.994282	0.00249047
HIIE	Post exercise	IGHG2	-0.13981	18.9012	-1.13739	-5.13969	0.257395	0.994282	0.00249047
HIIE	Post exercise	IGHV3-72	-0.104653	17.0163	-1.1571	-5.11953	0.24928	0.994282	0.00249047
HIIE	Post exercise	JAGN1	-0.149037	16.2813	-1.162	-5.11446	0.24729	0.994282	0.00249047
HIIE	Post exercise	KMT2C	-0.204694	11.5816	-1.15333	-5.1234	0.250816	0.994282	0.00249047
HIIE	Post exercise	LANCL2	-0.0881581	16.5452	-1.14926	-5.12758	0.252483	0.994282	0.00249047
HIIE	Post exercise	MIB1	0.130269	12.7161	1.14731	-5.12958	0.253285	0.994282	0.00249047
HIIE	Post exercise	MINPP1	-0.0996623	14.2821	-1.16319	-5.11323	0.246805	0.994282	0.00249047
HIIE	Post exercise	MLST8	0.137911	13.4827	1.15378	-5.12295	0.250633	0.994282	0.00249047
HIIE	Post exercise	MRPL27	-0.125531	14.4316	-1.16009	-5.11644	0.248063	0.994282	0.00249047
HIIE	Post exercise	NRBP1	0.0885607	16.4823	1.13784	-5.13923	0.257206	0.994282	0.00249047
HIIE	Post exercise	NUDT1	-0.0868422	14.4381	-1.13907	-5.13798	0.256691	0.994282	0.00249047
HIIE	Post exercise	NUP62	0.191429	12.7537	1.15367	-5.12306	0.250677	0.994282	0.00249047
HIIE	Post exercise	OLFML2A	-0.164855	13.857	-1.1484	-5.12846	0.252836	0.994282	0.00249047
HIIE	Post exercise	PBLD	-0.178196	13.2256	-1.13742	-5.13965	0.257381	0.994282	0.00249047
HIIE	Post exercise	PDPR	-0.080559	16.416	-1.16417	-5.11221	0.24641	0.994282	0.00249047
HIIE	Post exercise	PGAM5	-0.0668411	18.0915	-1.16262	-5.11382	0.247036	0.994282	0.00249047
HIIE	Post exercise	PIGQ	-0.212833	12.2227	-1.15141	-5.12538	0.251602	0.994282	0.00249047
HIIE	Post exercise	PNP	-0.0782077	20.3783	-1.13318	-5.14394	0.259149	0.994282	0.00249047
HIIE	Post exercise	PPP1R18	0.124546	15.5356	1.14709	-5.1298	0.253377	0.994282	0.00249047
HIIE	Post exercise	PRCP	0.161307	16.285	1.14092	-5.13609	0.255925	0.994282	0.00249047
HIIE	Post exercise	PRDX5	0.0618265	21.2101	1.15038	-5.12643	0.25202	0.994282	0.00249047
HIIE	Post exercise	PRTN3	-0.245343	19.4698	-1.14304	-5.13394	0.255049	0.994282	0.00249047
HIIE	Post exercise	PSD4	0.0873745	14.7747	1.16176	-5.11471	0.247383	0.994282	0.00249047
HIIE	Post exercise	PSMB4	-0.188431	19.2275	-1.15763	-5.11898	0.249063	0.994282	0.00249047
HIIE	Post exercise	QNG1	-0.0801433	15.4093	-1.14894	-5.12791	0.252613	0.994282	0.00249047
HIIE	Post exercise	RHBDF2	-0.077418	14.9571	-1.14272	-5.13427	0.25518	0.994282	0.00249047
HIIE	Post exercise	SF3B6	-0.16588	17.4498	-1.15835	-5.11823	0.248769	0.994282	0.00249047
HIIE	Post exercise	SLC30A1	-0.0745323	15.5959	-1.14277	-5.13422	0.255158	0.994282	0.00249047
HIIE	Post exercise	SNRPF	-0.237122	16.0655	-1.14792	-5.12896	0.253036	0.994282	0.00249047
HIIE	Post exercise	SSR1	-0.10412	18.3733	-1.1332	-5.14393	0.259144	0.994282	0.00249047
HIIE	Post exercise	STK24	0.165917	17.4716	1.16402	-5.11237	0.246472	0.994282	0.00249047
HIIE	Post exercise	SYNE3	-0.1024	14.3708	-1.1478	-5.12908	0.253085	0.994282	0.00249047
HIIE	Post exercise	SYTL1	0.128338	15.4795	1.15235	-5.12441	0.251217	0.994282	0.00249047
HIIE	Post exercise	TBXA2R	-0.0976406	17.0449	-1.13876	-5.13829	0.256822	0.994282	0.00249047
HIIE	Post exercise	TK2	-0.0753143	16.5272	-1.15553	-5.12114	0.249915	0.994282	0.00249047
HIIE	Post exercise	TMEM128	-0.100396	15.3136	-1.14758	-5.1293	0.253175	0.994282	0.00249047
HIIE	Post exercise	TMEM205	-0.142414	16.8159	-1.13766	-5.13941	0.25728	0.994282	0.00249047
HIIE	Post exercise	TMOD2	0.190616	13.7073	1.15049	-5.12632	0.25198	0.994282	0.00249047
HIIE	Post exercise	TOMM22	-0.156613	16.2905	-1.13819	-5.13887	0.25706	0.994282	0.00249047
HIIE	Post exercise	UEVLD	0.104874	13.4461	1.15795	-5.11864	0.248928	0.994282	0.00249047
HIIE	Post exercise	USP14	-0.0525033	17.9325	-1.14808	-5.1288	0.252968	0.994282	0.00249047
HIIE	Post exercise	ZC3H4	0.149536	13.5268	1.1551	-5.12158	0.250093	0.994282	0.00249047
HIIE	Post exercise	ITPKB	-0.0944002	15.616	-1.13233	-5.1448	0.259507	0.994392	0.00244228
HIIE	Post exercise	SCAF1	0.208961	13.236	1.13235	-5.14479	0.2595	0.994392	0.00244228
HIIE	Post exercise	ABHD17A	0.0918464	15.7605	1.12692	-5.15025	0.261778	0.995602	0.00191412
HIIE	Post exercise	ARID4B	-0.217528	12.7182	-1.12768	-5.14949	0.261458	0.995602	0.00191412
HIIE	Post exercise	ATAD3B	-0.0791423	15.4336	-1.12723	-5.14994	0.261644	0.995602	0.00191412
HIIE	Post exercise	DOCK5	-0.0688715	16.3687	-1.12959	-5.14756	0.260651	0.995602	0.00191412
HIIE	Post exercise	FGB	-0.378627	24.5682	-1.12913	-5.14803	0.26085	0.995602	0.00191412
HIIE	Post exercise	LCK	0.133322	16.599	1.13006	-5.14709	0.260458	0.995602	0.00191412
HIIE	Post exercise	NDOR1	-0.0831942	14.5909	-1.12836	-5.14881	0.261169	0.995602	0.00191412
HIIE	Post exercise	NIBAN2	-0.13302	13.8057	-1.12671	-5.15046	0.261867	0.995602	0.00191412
HIIE	Post exercise	NRAS	-0.0530552	19.4916	-1.12647	-5.15071	0.261966	0.995602	0.00191412
HIIE	Post exercise	OGT	0.0723146	15.3068	1.1282	-5.14897	0.261237	0.995602	0.00191412
HIIE	Post exercise	PTEN	-0.0652203	14.2451	-1.13052	-5.14663	0.260261	0.995602	0.00191412
HIIE	Post exercise	UBE2J1	-0.115449	15.9723	-1.13049	-5.14666	0.260276	0.995602	0.00191412
HIIE	Post exercise	UNC119	0.083416	15.4383	1.12824	-5.14892	0.26122	0.995602	0.00191412
HIIE	Post exercise	GTF3C4	-0.140641	13.8817	-1.12473	-5.15245	0.262703	0.997148	0.00124019
HIIE	Post exercise	PRPSAP1	0.0564343	15.5886	1.12493	-5.15226	0.262617	0.997148	0.00124019
HIIE	Post exercise	CD63	-0.174853	17.5682	-1.12406	-5.15312	0.262986	0.997401	0.00113021
HIIE	Post exercise	CHD1	-0.188141	12.4625	-1.12123	-5.15596	0.264183	0.997401	0.00113021
HIIE	Post exercise	CYTH2	-0.100071	16.2479	-1.12002	-5.15717	0.264697	0.997401	0.00113021
HIIE	Post exercise	DYNC1LI2	0.076927	14.4524	1.11736	-5.15982	0.265825	0.997401	0.00113021
HIIE	Post exercise	EIF3E	0.0637099	18.3103	1.12005	-5.15713	0.26468	0.997401	0.00113021
HIIE	Post exercise	FXN	0.12925	13.7844	1.1184	-5.15879	0.265388	0.997401	0.00113021
HIIE	Post exercise	HINT1	0.0845621	18.1661	1.1194	-5.15778	0.26496	0.997401	0.00113021
HIIE	Post exercise	IRF8	0.147738	13.6544	1.11741	-5.15977	0.265808	0.997401	0.00113021
HIIE	Post exercise	NUP54	0.0839984	16.0692	1.12158	-5.15561	0.264034	0.997401	0.00113021
HIIE	Post exercise	PAFAH2	0.135598	13.7214	1.12379	-5.1534	0.263102	0.997401	0.00113021
HIIE	Post exercise	PCBP2	0.0597588	21.0507	1.11717	-5.16001	0.265908	0.997401	0.00113021
HIIE	Post exercise	RAB11B	-0.0761142	22.8464	-1.12216	-5.15503	0.263786	0.997401	0.00113021
HIIE	Post exercise	SH3BGRL	-0.100389	19.4702	-1.12039	-5.1568	0.26454	0.997401	0.00113021
HIIE	Post exercise	SNRNP27	-0.226469	14.4753	-1.11764	-5.15954	0.26571	0.997401	0.00113021
HIIE	Post exercise	TOR1AIP2	0.120637	14.2073	1.11833	-5.15885	0.265416	0.997401	0.00113021
HIIE	Post exercise	VPS35L	-0.0608963	14.9598	-1.12308	-5.15411	0.263397	0.997401	0.00113021
HIIE	Post exercise	VSIR	0.10767	15.2043	1.11906	-5.15813	0.265107	0.997401	0.00113021
HIIE	Post exercise	WDR87	-0.601729	14.4757	-1.11932	-5.15786	0.264993	0.997401	0.00113021
HIIE	Post exercise	ZBTB11	-0.15301	12.8019	-1.12159	-5.15559	0.26403	0.997401	0.00113021
HIIE	Post exercise	IGFALS	-0.11304	14.2914	-1.11652	-5.16066	0.266188	0.997833	0.000942123
HIIE	Post exercise	COX4I1	-0.0929533	20.006	-1.1128	-5.16435	0.267775	0.998205	0.000780273
HIIE	Post exercise	DDX18	-0.125236	17.1145	-1.11294	-5.16422	0.267716	0.998205	0.000780273
HIIE	Post exercise	IGLV1-47	-0.139637	15.3317	-1.1136	-5.16356	0.267432	0.998205	0.000780273
HIIE	Post exercise	INTS7	0.151381	12.9533	1.1149	-5.16227	0.266878	0.998205	0.000780273
HIIE	Post exercise	OSBPL8	-0.0709668	16.8434	-1.11358	-5.16358	0.267437	0.998205	0.000780273
HIIE	Post exercise	PSAT1	0.199994	14.0065	1.11387	-5.16329	0.267318	0.998205	0.000780273
HIIE	Post exercise	SELENOF	-0.102543	15.7305	-1.11496	-5.16221	0.266852	0.998205	0.000780273
HIIE	Post exercise	SH2D1A	0.1505	15.6428	1.113	-5.16416	0.267692	0.998205	0.000780273
HIIE	Post exercise	SLC35D3	-0.16091	14.5345	-1.11585	-5.16133	0.266473	0.998205	0.000780273
HIIE	Post exercise	A1BG	-0.0436986	18.0089	-0.343108	-5.66645	0.732052	0.999316	0.000297041
HIIE	Post exercise	A2M	0.0429887	21.098	0.337132	-5.66828	0.736542	0.999316	0.000297041
HIIE	Post exercise	AAAS	0.121935	15.1454	0.934136	-5.32771	0.351904	0.999316	0.000297041
HIIE	Post exercise	AAK1	0.0784524	14.5117	0.81197	-5.42322	0.418241	0.999316	0.000297041
HIIE	Post exercise	AAMDC	-0.0509914	15.4962	-0.429675	-5.63635	0.668118	0.999316	0.000297041
HIIE	Post exercise	AAMP	-0.12096	13.6213	-0.706492	-5.49504	0.481102	0.999316	0.000297041
HIIE	Post exercise	AARS1	-0.0480466	18.3715	-0.797618	-5.43358	0.426493	0.999316	0.000297041
HIIE	Post exercise	AARS2	0.00516064	15.2278	0.101841	-5.71479	0.919034	0.999316	0.000297041
HIIE	Post exercise	AASDHPPT	0.024315	15.8526	0.266059	-5.68758	0.790601	0.999316	0.000297041
HIIE	Post exercise	ABAT	-0.0146598	14.6769	-0.184545	-5.70412	0.853863	0.999316	0.000297041
HIIE	Post exercise	ABCA3	-0.0162627	13.1137	-0.150268	-5.70929	0.880778	0.999316	0.000297041
HIIE	Post exercise	ABCB10	-0.0382523	16.1496	-0.664102	-5.52112	0.507758	0.999316	0.000297041
HIIE	Post exercise	ABCB8	0.140728	12.2661	0.983777	-5.28514	0.326988	0.999316	0.000297041
HIIE	Post exercise	ABCC1	-0.0414854	16.2128	-0.659761	-5.5237	0.510532	0.999316	0.000297041
HIIE	Post exercise	ABCC3	-0.0952465	14.5791	-0.830803	-5.40936	0.407555	0.999316	0.000297041
HIIE	Post exercise	ABCC4	-0.0553793	17.5357	-0.541419	-5.58755	0.589113	0.999316	0.000297041
HIIE	Post exercise	ABCD1	0.00230704	15.123	0.0305129	-5.71905	0.975703	0.999316	0.000297041
HIIE	Post exercise	ABCD3	-0.0630302	15.3731	-1.09281	-5.18403	0.276424	0.999316	0.000297041
HIIE	Post exercise	ABCE1	0.0259512	17.4496	0.689322	-5.5058	0.491804	0.999316	0.000297041
HIIE	Post exercise	ABCF1	-0.00333418	17.5625	-0.0708511	-5.7172	0.943621	0.999316	0.000297041
HIIE	Post exercise	ABCF2	-0.00819037	14.9366	-0.0816863	-5.71646	0.935017	0.999316	0.000297041
HIIE	Post exercise	ABCF3	0.0560198	13.4375	0.62849	-5.54179	0.530745	0.999316	0.000297041
HIIE	Post exercise	ABHD10	-0.0728186	17.6363	-1.03433	-5.23956	0.302834	0.999316	0.000297041
HIIE	Post exercise	ABHD11	0.00457256	18.8052	0.0414949	-5.71869	0.966963	0.999316	0.000297041
HIIE	Post exercise	ABHD12	-0.037156	15.729	-0.816313	-5.42005	0.41576	0.999316	0.000297041
HIIE	Post exercise	ABHD13	-0.0823286	14.4193	-0.770642	-5.45254	0.442268	0.999316	0.000297041
HIIE	Post exercise	ABHD14B	-0.026721	17.8335	-0.478148	-5.61656	0.633318	0.999316	0.000297041
HIIE	Post exercise	ABHD16A	-0.00407932	19.5811	-0.0355331	-5.7189	0.971707	0.999316	0.000297041
HIIE	Post exercise	ABHD17B	0.0309434	15.4931	0.361072	-5.66076	0.718611	0.999316	0.000297041
HIIE	Post exercise	ABHD4	-0.113373	14.676	-1.10877	-5.16835	0.269505	0.999316	0.000297041
HIIE	Post exercise	ABHD5	0.0773968	14.7053	0.642012	-5.53407	0.521956	0.999316	0.000297041
HIIE	Post exercise	ABI1	-0.0067213	17.4091	-0.0439898	-5.71859	0.964978	0.999316	0.000297041
HIIE	Post exercise	ABI2	-0.0150185	16.7895	-0.103213	-5.71467	0.917947	0.999316	0.000297041
HIIE	Post exercise	ABLIM1	-0.0531193	16.592	-0.538119	-5.58915	0.591383	0.999316	0.000297041
HIIE	Post exercise	ABLIM3	-0.0115224	15.9318	-0.110901	-5.71393	0.91186	0.999316	0.000297041
HIIE	Post exercise	ABR	-0.0574405	15.0206	-0.66856	-5.51845	0.50492	0.999316	0.000297041
HIIE	Post exercise	ABRACL	-0.188343	18.2605	-0.986055	-5.28313	0.325873	0.999316	0.000297041
HIIE	Post exercise	ABRAXAS1	0.052316	12.4519	0.443125	-5.63107	0.658385	0.999316	0.000297041
HIIE	Post exercise	ABRAXAS2	0.0394191	15.8655	0.84373	-5.39966	0.400313	0.999316	0.000297041
HIIE	Post exercise	ABTB3	-0.0224808	14.9236	-0.124941	-5.71243	0.900757	0.999316	0.000297041
HIIE	Post exercise	ACAA1	0.00521812	16.5354	0.0436092	-5.71861	0.96528	0.999316	0.000297041
HIIE	Post exercise	ACACA	0.00914952	14.8128	0.164177	-5.70732	0.869837	0.999316	0.000297041
HIIE	Post exercise	ACAD8	-0.0407981	16.468	-0.746512	-5.46896	0.456657	0.999316	0.000297041
HIIE	Post exercise	ACADM	-0.0390727	19.79	-0.484067	-5.61399	0.629124	0.999316	0.000297041
HIIE	Post exercise	ACADS	-0.0537703	15.7731	-0.675808	-5.51408	0.50032	0.999316	0.000297041
HIIE	Post exercise	ACADSB	-0.0154419	18.2314	-0.186447	-5.70381	0.852374	0.999316	0.000297041
HIIE	Post exercise	ACADVL	-0.0748889	20.0485	-1.0678	-5.20814	0.287517	0.999316	0.000297041
HIIE	Post exercise	ACAP1	0.106867	15.1256	1.09018	-5.18658	0.277578	0.999316	0.000297041
HIIE	Post exercise	ACAP2	-0.00773657	16.224	-0.18253	-5.70446	0.85544	0.999316	0.000297041
HIIE	Post exercise	ACAP3	0.247433	13.0471	1.03552	-5.23845	0.302281	0.999316	0.000297041
HIIE	Post exercise	ACAT1	0.0964596	17.2606	0.595435	-5.55996	0.552551	0.999316	0.000297041
HIIE	Post exercise	ACBD3	0.0157818	16.7281	0.259864	-5.68905	0.795365	0.999316	0.000297041
HIIE	Post exercise	ACIN1	0.0942006	16.3609	0.731673	-5.47879	0.465639	0.999316	0.000297041
HIIE	Post exercise	ACLY	-0.0306711	18.8753	-0.746776	-5.46878	0.456498	0.999316	0.000297041
HIIE	Post exercise	ACO1	-0.0417016	17.4172	-0.557268	-5.57973	0.578269	0.999316	0.000297041
HIIE	Post exercise	ACO2	0.0140057	19.1908	0.228558	-5.69594	0.819558	0.999316	0.000297041
HIIE	Post exercise	ACOT1	0.0116132	17.4685	0.185495	-5.70397	0.853119	0.999316	0.000297041
HIIE	Post exercise	ACOT13	-0.0385197	17.8825	-0.841603	-5.40127	0.401499	0.999316	0.000297041
HIIE	Post exercise	ACOT8	-0.0395691	16.9481	-0.478576	-5.61637	0.633016	0.999316	0.000297041
HIIE	Post exercise	ACOT9	-0.043482	17.8733	-0.774115	-5.45014	0.440217	0.999316	0.000297041
HIIE	Post exercise	ACOX1	-0.0661744	18.1035	-0.948411	-5.31569	0.344617	0.999316	0.000297041
HIIE	Post exercise	ACP1	0.0330067	18.3165	0.471932	-5.61921	0.637738	0.999316	0.000297041
HIIE	Post exercise	ACP2	-0.0551567	17.5401	-0.980226	-5.28826	0.328729	0.999316	0.000297041
HIIE	Post exercise	ACP6	-0.0529308	13.7058	-0.4894	-5.61166	0.625354	0.999316	0.000297041
HIIE	Post exercise	ACSBG1	0.0521577	13.9894	0.377616	-5.65526	0.70631	0.999316	0.000297041
HIIE	Post exercise	ACSF2	0.0209943	14.995	0.423936	-5.63855	0.672287	0.999316	0.000297041
HIIE	Post exercise	ACSF3	-0.0136751	15.8528	-0.210601	-5.69949	0.833516	0.999316	0.000297041
HIIE	Post exercise	ACSL5	-0.0484185	17.4923	-0.800679	-5.43138	0.424725	0.999316	0.000297041
HIIE	Post exercise	ACTB	0.076755	23.6279	0.324205	-5.67213	0.746286	0.999316	0.000297041
HIIE	Post exercise	ACTBL2	0.151265	22.1853	0.713044	-5.49087	0.477051	0.999316	0.000297041
HIIE	Post exercise	ACTG1	0.0990512	28.5461	0.755661	-5.46279	0.451171	0.999316	0.000297041
HIIE	Post exercise	ACTG2	0.139898	20.361	0.82841	-5.41114	0.408903	0.999316	0.000297041
HIIE	Post exercise	ACTL6A	-0.0214742	16.2187	-0.246866	-5.69202	0.805388	0.999316	0.000297041
HIIE	Post exercise	ACTN1	-0.0606517	22.9989	-0.589478	-5.56313	0.556528	0.999316	0.000297041
HIIE	Post exercise	ACTN4	0.0125577	19.2983	0.0706351	-5.71722	0.943793	0.999316	0.000297041
HIIE	Post exercise	ACTR10	-0.0235925	16.9639	-0.372329	-5.65704	0.710232	0.999316	0.000297041
HIIE	Post exercise	ACTR1A	0.0377814	19.6019	0.52907	-5.5935	0.597627	0.999316	0.000297041
HIIE	Post exercise	ACTR1B	0.106408	16.2263	1.05011	-5.22486	0.295545	0.999316	0.000297041
HIIE	Post exercise	ACTR3	0.0771248	22.1454	1.07851	-5.19788	0.282732	0.999316	0.000297041
HIIE	Post exercise	ACTR5	0.151788	13.2165	1.08441	-5.19219	0.28012	0.999316	0.000297041
HIIE	Post exercise	ACTR6	-0.0456286	12.7148	-0.230269	-5.69558	0.818232	0.999316	0.000297041
HIIE	Post exercise	ACTR8	0.00616734	13.7109	0.0406623	-5.71872	0.967625	0.999316	0.000297041
HIIE	Post exercise	ACVR1	-0.0821972	16.0051	-0.67307	-5.51574	0.502055	0.999316	0.000297041
HIIE	Post exercise	ADAM10	0.0117284	20.0017	0.118726	-5.71312	0.905669	0.999316	0.000297041
HIIE	Post exercise	ADAM8	0.0310425	13.0135	0.245786	-5.69226	0.806222	0.999316	0.000297041
HIIE	Post exercise	ADAM9	0.0245303	15.0397	0.153808	-5.70881	0.877991	0.999316	0.000297041
HIIE	Post exercise	ADAMDEC1	0.0151193	14.2959	0.116881	-5.71331	0.907128	0.999316	0.000297041
HIIE	Post exercise	ADAMTSL2	-0.17787	13.547	-1.0155	-5.2568	0.311688	0.999316	0.000297041
HIIE	Post exercise	ADAP1	-0.125233	14.0617	-0.951293	-5.31324	0.343159	0.999316	0.000297041
HIIE	Post exercise	ADAR	0.0123076	14.6936	0.117324	-5.71327	0.906778	0.999316	0.000297041
HIIE	Post exercise	ADARB1	-0.119449	13.2207	-0.697727	-5.50057	0.48655	0.999316	0.000297041
HIIE	Post exercise	ADAT2	0.0990769	13.67	0.642597	-5.53374	0.521578	0.999316	0.000297041
HIIE	Post exercise	ADCY3	0.0173036	11.8188	0.150352	-5.70928	0.880711	0.999316	0.000297041
HIIE	Post exercise	ADCY6	-0.09718	16.942	-1.00732	-5.26419	0.315585	0.999316	0.000297041
HIIE	Post exercise	ADD1	0.0071047	18.1885	0.150324	-5.70929	0.880734	0.999316	0.000297041
HIIE	Post exercise	ADD2	-0.100627	13.6534	-0.442739	-5.63122	0.658664	0.999316	0.000297041
HIIE	Post exercise	ADD3	0.0194918	17.9773	0.536327	-5.59002	0.592615	0.999316	0.000297041
HIIE	Post exercise	ADH5	-0.0261733	19.4379	-0.524179	-5.59581	0.601014	0.999316	0.000297041
HIIE	Post exercise	ADI1	-0.12895	13.1442	-0.915422	-5.3432	0.361605	0.999316	0.000297041
HIIE	Post exercise	ADISSP	-0.00134452	14.8579	-0.0164774	-5.71934	0.986878	0.999316	0.000297041
HIIE	Post exercise	ADK	-0.0194006	17.179	-0.230104	-5.69562	0.81836	0.999316	0.000297041
HIIE	Post exercise	ADNP	-0.13389	13.7123	-1.07412	-5.2021	0.284688	0.999316	0.000297041
HIIE	Post exercise	ADO	0.0103311	14.0956	0.176394	-5.70545	0.860249	0.999316	0.000297041
HIIE	Post exercise	ADPGK	0.0356673	16.1632	0.364965	-5.65949	0.715709	0.999316	0.000297041
HIIE	Post exercise	ADPRH	-0.0492177	15.3736	-0.597069	-5.55908	0.551463	0.999316	0.000297041
HIIE	Post exercise	ADPRS	-0.00850282	16.3928	-0.11207	-5.71381	0.910935	0.999316	0.000297041
HIIE	Post exercise	ADRM1	0.0357353	16.8439	0.404972	-5.64563	0.68614	0.999316	0.000297041
HIIE	Post exercise	ADSL	0.0064641	16.2157	0.0797424	-5.7166	0.93656	0.999316	0.000297041
HIIE	Post exercise	ADSS2	0.0186907	16.7659	0.263036	-5.6883	0.792925	0.999316	0.000297041
HIIE	Post exercise	AFAP1	-0.352913	13.2926	-0.911332	-5.34654	0.363748	0.999316	0.000297041
HIIE	Post exercise	AFG1L	-0.0577583	13.8162	-0.911164	-5.34668	0.363834	0.999316	0.000297041
HIIE	Post exercise	AFG3L2	0.0389932	17.1233	0.511918	-5.60152	0.609546	0.999316	0.000297041
HIIE	Post exercise	AFM	-0.0772764	14.7649	-0.767722	-5.45455	0.443996	0.999316	0.000297041
HIIE	Post exercise	AGAP2	0.0417741	15.4777	0.802649	-5.42997	0.423589	0.999316	0.000297041
HIIE	Post exercise	AGFG1	-0.0123353	15.8598	-0.242911	-5.69289	0.808443	0.999316	0.000297041
HIIE	Post exercise	AGFG2	0.0164475	12.6466	0.163255	-5.70746	0.870562	0.999316	0.000297041
HIIE	Post exercise	AGL	0.0427211	16.8536	0.746825	-5.46875	0.456469	0.999316	0.000297041
HIIE	Post exercise	AGO1	0.0414871	15.9515	0.527433	-5.59427	0.59876	0.999316	0.000297041
HIIE	Post exercise	AGO2	0.00929672	15.1398	0.145563	-5.70992	0.884484	0.999316	0.000297041
HIIE	Post exercise	AGO3	0.0722952	13.7621	0.705229	-5.49584	0.481885	0.999316	0.000297041
HIIE	Post exercise	AGPAT1	0.0123949	17.4883	0.120804	-5.71289	0.904027	0.999316	0.000297041
HIIE	Post exercise	AGPS	-0.0203103	16.2304	-0.300491	-5.6788	0.764265	0.999316	0.000297041
HIIE	Post exercise	AGRN	-0.0660762	13.3611	-0.639605	-5.53546	0.523514	0.999316	0.000297041
HIIE	Post exercise	AGT	-0.125189	15.4677	-1.00572	-5.26563	0.316353	0.999316	0.000297041
HIIE	Post exercise	AHCTF1	0.0135719	13.1622	0.122341	-5.71272	0.902811	0.999316	0.000297041
HIIE	Post exercise	AHCY	0.00228458	19.2859	0.0459318	-5.71852	0.963433	0.999316	0.000297041
HIIE	Post exercise	AHCYL1	-0.0973904	15.4687	-0.728197	-5.48107	0.467756	0.999316	0.000297041
HIIE	Post exercise	AHCYL2	0.0247631	18.1605	0.228488	-5.69595	0.819613	0.999316	0.000297041
HIIE	Post exercise	AHNAK	0.0114102	19.1447	0.078117	-5.71672	0.937851	0.999316	0.000297041
HIIE	Post exercise	AHSA1	-0.00426026	17.4459	-0.079006	-5.71665	0.937145	0.999316	0.000297041
HIIE	Post exercise	AHSG	0.100605	16.5606	0.400583	-5.64722	0.689361	0.999316	0.000297041
HIIE	Post exercise	AIDA	0.0493747	15.7577	0.776445	-5.44852	0.438845	0.999316	0.000297041
HIIE	Post exercise	AIFM1	-0.0334878	19.0865	-0.780215	-5.44589	0.43663	0.999316	0.000297041
HIIE	Post exercise	AIMP1	-0.0302166	16.4608	-0.818538	-5.41842	0.414493	0.999316	0.000297041
HIIE	Post exercise	AIMP2	0.033388	15.7337	0.433941	-5.63469	0.665025	0.999316	0.000297041
HIIE	Post exercise	AK1	-0.0677031	19.6667	-0.613085	-5.55038	0.540854	0.999316	0.000297041
HIIE	Post exercise	AK2	-0.0491087	19.7157	-0.569936	-5.57331	0.56967	0.999316	0.000297041
HIIE	Post exercise	AK3	-0.104961	19.8716	-1.04446	-5.23015	0.298144	0.999316	0.000297041
HIIE	Post exercise	AKAP10	0.0381808	13.9532	0.424579	-5.63831	0.67182	0.999316	0.000297041
HIIE	Post exercise	AKAP13	0.0349074	15.0187	0.430701	-5.63595	0.667373	0.999316	0.000297041
HIIE	Post exercise	AKAP17A	0.0319974	15.0396	0.247335	-5.69191	0.805026	0.999316	0.000297041
HIIE	Post exercise	AKAP8	0.00142501	13.8766	0.0123702	-5.7194	0.990149	0.999316	0.000297041
HIIE	Post exercise	AKAP8L	-0.0665661	15.4849	-0.642595	-5.53374	0.521578	0.999316	0.000297041
HIIE	Post exercise	AKR1A1	-0.0460381	18.553	-0.882525	-5.36967	0.379062	0.999316	0.000297041
HIIE	Post exercise	AKR1B1	-0.0197127	19.0786	-0.237186	-5.69413	0.812872	0.999316	0.000297041
HIIE	Post exercise	AKR7A2	-0.0349997	19.149	-0.628853	-5.54158	0.530508	0.999316	0.000297041
HIIE	Post exercise	AKT1	0.0045156	15.8596	0.07647	-5.71683	0.939158	0.999316	0.000297041
HIIE	Post exercise	AKT2	-0.0589066	14.2921	-0.952175	-5.3125	0.34271	0.999316	0.000297041
HIIE	Post exercise	AKT3	0.103311	13.347	0.907809	-5.34941	0.3656	0.999316	0.000297041
HIIE	Post exercise	ALB	0.0852701	25.1487	0.521673	-5.59699	0.602754	0.999316	0.000297041
HIIE	Post exercise	ALCAM	0.110716	14.3313	1.04875	-5.22614	0.296171	0.999316	0.000297041
HIIE	Post exercise	ALDH16A1	0.0759627	16.6372	0.720608	-5.486	0.472399	0.999316	0.000297041
HIIE	Post exercise	ALDH18A1	0.0598055	15.9433	1.04429	-5.23031	0.29822	0.999316	0.000297041
HIIE	Post exercise	ALDH1B1	0.0408344	15.0812	0.346767	-5.66532	0.729307	0.999316	0.000297041
HIIE	Post exercise	ALDH5A1	-0.0210881	16.758	-0.412157	-5.64298	0.680878	0.999316	0.000297041
HIIE	Post exercise	ALDH6A1	-0.0488958	17.8331	-0.877609	-5.37355	0.381716	0.999316	0.000297041
HIIE	Post exercise	ALDH7A1	-0.0497712	14.9599	-0.623462	-5.54462	0.534034	0.999316	0.000297041
HIIE	Post exercise	ALDH9A1	-0.0050456	18.6969	-0.0560638	-5.71805	0.955374	0.999316	0.000297041
HIIE	Post exercise	ALDOC	-0.00389643	20.9995	-0.043454	-5.71862	0.965404	0.999316	0.000297041
HIIE	Post exercise	ALG1	0.0141122	17.2457	0.177611	-5.70526	0.859295	0.999316	0.000297041
HIIE	Post exercise	ALG11	-0.00279131	16.4383	-0.0429387	-5.71864	0.965814	0.999316	0.000297041
HIIE	Post exercise	ALG12	-0.106034	14.4068	-0.985647	-5.28349	0.326073	0.999316	0.000297041
HIIE	Post exercise	ALG3	-0.0733334	14.5924	-0.642188	-5.53397	0.521842	0.999316	0.000297041
HIIE	Post exercise	ALG5	-0.0722552	16.566	-0.742616	-5.47156	0.459007	0.999316	0.000297041
HIIE	Post exercise	ALG9	0.0148903	14.2229	0.159729	-5.70797	0.873334	0.999316	0.000297041
HIIE	Post exercise	ALKBH5	0.126696	13.6288	0.958512	-5.30708	0.339521	0.999316	0.000297041
HIIE	Post exercise	ALOX12	-0.103099	21.3075	-0.986899	-5.28239	0.325461	0.999316	0.000297041
HIIE	Post exercise	ALOX5AP	0.0311069	17.9133	0.200882	-5.70129	0.841094	0.999316	0.000297041
HIIE	Post exercise	ALS2	0.0294195	13.9105	0.443118	-5.63107	0.65839	0.999316	0.000297041
HIIE	Post exercise	AMBP	0.0315843	15.5888	0.24291	-5.69289	0.808444	0.999316	0.000297041
HIIE	Post exercise	AMDHD2	-0.00949928	15.3114	-0.139447	-5.71071	0.889305	0.999316	0.000297041
HIIE	Post exercise	AMPD2	-0.0467305	19.4544	-0.711088	-5.49212	0.478257	0.999316	0.000297041
HIIE	Post exercise	AMPD3	0.00790248	14.4405	0.0725316	-5.7171	0.942286	0.999316	0.000297041
HIIE	Post exercise	AMY1A	-0.22323	12.8579	-0.988942	-5.28058	0.324464	0.999316	0.000297041
HIIE	Post exercise	ANAPC2	0.0629144	12.4365	0.780793	-5.44548	0.436292	0.999316	0.000297041
HIIE	Post exercise	ANAPC4	-0.0272444	13.2024	-0.347683	-5.66503	0.72862	0.999316	0.000297041
HIIE	Post exercise	ANAPC5	0.00997496	12.2926	0.138307	-5.71085	0.890204	0.999316	0.000297041
HIIE	Post exercise	ANAPC7	0.0543698	13.7502	0.97795	-5.29025	0.329849	0.999316	0.000297041
HIIE	Post exercise	ANGEL2	-0.0332036	13.8374	-0.178653	-5.70509	0.858479	0.999316	0.000297041
HIIE	Post exercise	ANK1	-0.084677	16.6447	-0.749459	-5.46698	0.454887	0.999316	0.000297041
HIIE	Post exercise	ANK2	0.0229469	15.3179	0.228967	-5.69585	0.819242	0.999316	0.000297041
HIIE	Post exercise	ANK3	0.0639456	13.028	0.449655	-5.62845	0.653681	0.999316	0.000297041
HIIE	Post exercise	ANKFY1	0.0459598	16.7639	1.03129	-5.24236	0.304249	0.999316	0.000297041
HIIE	Post exercise	ANKHD1	-0.0750644	13.9666	-0.60143	-5.55674	0.548564	0.999316	0.000297041
HIIE	Post exercise	ANKMY2	-0.0873169	15.0123	-0.910541	-5.34719	0.364163	0.999316	0.000297041
HIIE	Post exercise	ANKRD13A	-0.0183876	16.0351	-0.282756	-5.68346	0.777797	0.999316	0.000297041
HIIE	Post exercise	ANKRD13D	-0.0246773	16.218	-0.339305	-5.66762	0.734908	0.999316	0.000297041
HIIE	Post exercise	ANKRD22	-0.138791	12.3934	-0.695025	-5.50225	0.488236	0.999316	0.000297041
HIIE	Post exercise	ANKRD28	0.0474975	14.3414	0.611615	-5.55119	0.541822	0.999316	0.000297041
HIIE	Post exercise	ANKS1A	0.0751858	14.7042	0.726584	-5.48212	0.468741	0.999316	0.000297041
HIIE	Post exercise	ANKZF1	0.0824801	12.2059	0.696741	-5.50118	0.487164	0.999316	0.000297041
HIIE	Post exercise	ANP32A	0.0484682	17.5828	0.381481	-5.65394	0.703447	0.999316	0.000297041
HIIE	Post exercise	ANP32B	0.0116178	16.9122	0.0881399	-5.71597	0.929896	0.999316	0.000297041
HIIE	Post exercise	ANP32E	0.121221	16.1998	0.79028	-5.4388	0.430753	0.999316	0.000297041
HIIE	Post exercise	ANTXR2	-0.0650911	13.8539	-0.591071	-5.56229	0.555463	0.999316	0.000297041
HIIE	Post exercise	ANXA2	0.250329	20.0122	0.871211	-5.37856	0.385188	0.999316	0.000297041
HIIE	Post exercise	AOC3	-0.0564914	14.7765	-0.391112	-5.65059	0.696332	0.999316	0.000297041
HIIE	Post exercise	AP1B1	-0.0380117	19.2013	-0.74925	-5.46712	0.455011	0.999316	0.000297041
HIIE	Post exercise	AP1G2	-0.0276398	16.1462	-0.556619	-5.58005	0.57871	0.999316	0.000297041
HIIE	Post exercise	AP1M1	-0.0569718	19.2162	-1.06154	-5.21409	0.290339	0.999316	0.000297041
HIIE	Post exercise	AP1M2	0.0907535	13.2462	0.957485	-5.30796	0.340035	0.999316	0.000297041
HIIE	Post exercise	AP1S1	-0.14634	16.9615	-1.07535	-5.20092	0.28414	0.999316	0.000297041
HIIE	Post exercise	AP2A1	0.0171284	17.9288	0.405746	-5.64534	0.685572	0.999316	0.000297041
HIIE	Post exercise	AP2A2	-0.0225569	18.6975	-0.628834	-5.54159	0.53052	0.999316	0.000297041
HIIE	Post exercise	AP2B1	0.0119171	18.9233	0.253984	-5.69041	0.799894	0.999316	0.000297041
HIIE	Post exercise	AP2M1	-0.0239368	18.9128	-0.490527	-5.61116	0.624558	0.999316	0.000297041
HIIE	Post exercise	AP3D1	-0.0334843	17.5263	-0.647101	-5.53113	0.518666	0.999316	0.000297041
HIIE	Post exercise	AP3M1	-0.00978867	17.6453	-0.206266	-5.7003	0.836894	0.999316	0.000297041
HIIE	Post exercise	AP3S1	-0.0107125	15.5324	-0.158451	-5.70816	0.874339	0.999316	0.000297041
HIIE	Post exercise	AP4E1	-0.030705	15.4656	-0.420348	-5.63992	0.6749	0.999316	0.000297041
HIIE	Post exercise	AP4M1	0.0285829	14.2555	0.450275	-5.6282	0.653235	0.999316	0.000297041
HIIE	Post exercise	AP4S1	0.0508021	15.4113	0.819259	-5.4179	0.414083	0.999316	0.000297041
HIIE	Post exercise	AP5B1	0.107127	12.3612	1.07027	-5.20579	0.286409	0.999316	0.000297041
HIIE	Post exercise	APAF1	-0.0074082	15.557	-0.161245	-5.70775	0.872142	0.999316	0.000297041
HIIE	Post exercise	APBA2	0.130582	12.4233	0.355523	-5.66255	0.722754	0.999316	0.000297041
HIIE	Post exercise	APBB1IP	-0.00666152	15.6076	-0.0517933	-5.71826	0.95877	0.999316	0.000297041
HIIE	Post exercise	APCS	0.0227286	15.8883	0.158308	-5.70818	0.874451	0.999316	0.000297041
HIIE	Post exercise	APEH	-0.0444718	18.527	-0.822732	-5.41534	0.412112	0.999316	0.000297041
HIIE	Post exercise	APEX1	-0.0369147	18.7617	-0.27675	-5.68497	0.782396	0.999316	0.000297041
HIIE	Post exercise	APH1B	0.094059	14.6992	0.623841	-5.5444	0.533786	0.999316	0.000297041
HIIE	Post exercise	API5	0.0801994	15.6797	0.705618	-5.4956	0.481644	0.999316	0.000297041
HIIE	Post exercise	APIP	-0.0572072	14.348	-0.422365	-5.63915	0.673432	0.999316	0.000297041
HIIE	Post exercise	APMAP	0.0624621	19.5362	0.631305	-5.54019	0.52891	0.999316	0.000297041
HIIE	Post exercise	APOA1	0.0761683	14.8624	0.556588	-5.58007	0.578732	0.999316	0.000297041
HIIE	Post exercise	APOA2	-0.10349	15.0231	-0.614868	-5.54939	0.539679	0.999316	0.000297041
HIIE	Post exercise	APOB	-0.112141	17.3121	-0.868161	-5.38093	0.38685	0.999316	0.000297041
HIIE	Post exercise	APOBEC3C	0.125734	14.6743	0.890175	-5.3636	0.374958	0.999316	0.000297041
HIIE	Post exercise	APOBR	-0.103395	13.2479	-0.731697	-5.47878	0.465624	0.999316	0.000297041
HIIE	Post exercise	APOC3	-0.115094	14.5701	-0.678057	-5.51271	0.498898	0.999316	0.000297041
HIIE	Post exercise	APOE	-0.0967906	16.4908	-0.733158	-5.47782	0.464736	0.999316	0.000297041
HIIE	Post exercise	APOH	0.122015	17.3114	0.539643	-5.58842	0.590333	0.999316	0.000297041
HIIE	Post exercise	APOL3	-0.0267009	13.8543	-0.16098	-5.70779	0.87235	0.999316	0.000297041
HIIE	Post exercise	APOO	-0.00143425	15.9627	-0.0160545	-5.71935	0.987215	0.999316	0.000297041
HIIE	Post exercise	APP	-0.125622	18.9413	-0.935692	-5.32641	0.351106	0.999316	0.000297041
HIIE	Post exercise	APPL1	0.00867714	17.519	0.220066	-5.69765	0.826153	0.999316	0.000297041
HIIE	Post exercise	APRT	0.0318906	19.9722	0.535176	-5.59058	0.593409	0.999316	0.000297041
HIIE	Post exercise	APTX	-0.245118	16.0153	-1.00489	-5.26638	0.316753	0.999316	0.000297041
HIIE	Post exercise	AQR	0.0301516	14.6297	0.272221	-5.68609	0.785869	0.999316	0.000297041
HIIE	Post exercise	ARAF	0.0161594	15.262	0.364905	-5.65951	0.715754	0.999316	0.000297041
HIIE	Post exercise	ARAP1	-0.0486266	18.2959	-1.05661	-5.21876	0.292578	0.999316	0.000297041
HIIE	Post exercise	ARB2A	-0.0311184	13.7747	-0.270757	-5.68645	0.786992	0.999316	0.000297041
HIIE	Post exercise	ARCN1	0.0329354	19.5009	1.05035	-5.22464	0.295434	0.999316	0.000297041
HIIE	Post exercise	ARF4	-0.0753264	20.3827	-0.973216	-5.29438	0.33219	0.999316	0.000297041
HIIE	Post exercise	ARF5	-0.0351015	17.9768	-0.386364	-5.65225	0.699836	0.999316	0.000297041
HIIE	Post exercise	ARF6	-0.0287961	19.3406	-0.342427	-5.66666	0.732563	0.999316	0.000297041
HIIE	Post exercise	ARFGAP3	0.0677296	14.0594	0.949601	-5.31468	0.344013	0.999316	0.000297041
HIIE	Post exercise	ARFGEF1	-0.0420249	16.5886	-0.818084	-5.41876	0.414751	0.999316	0.000297041
HIIE	Post exercise	ARFGEF2	0.00154483	14.1564	0.0288598	-5.71909	0.977019	0.999316	0.000297041
HIIE	Post exercise	ARFIP1	0.075427	16.5143	0.720366	-5.48616	0.472548	0.999316	0.000297041
HIIE	Post exercise	ARFRP1	-0.0550861	14.8168	-0.66903	-5.51817	0.50462	0.999316	0.000297041
HIIE	Post exercise	ARG2	-0.0381034	14.4435	-0.330099	-5.67039	0.741838	0.999316	0.000297041
HIIE	Post exercise	ARGLU1	0.00319734	15.255	0.0145927	-5.71937	0.988379	0.999316	0.000297041
HIIE	Post exercise	ARHGAP1	-0.00672291	19.7034	-0.0809093	-5.71652	0.935634	0.999316	0.000297041
HIIE	Post exercise	ARHGAP10	-0.0736299	15.8078	-0.914062	-5.34431	0.362317	0.999316	0.000297041
HIIE	Post exercise	ARHGAP15	-0.0793322	14.867	-0.74489	-5.47004	0.457635	0.999316	0.000297041
HIIE	Post exercise	ARHGAP18	-0.0784032	19.4598	-0.828837	-5.41082	0.408662	0.999316	0.000297041
HIIE	Post exercise	ARHGAP21	-0.0703107	13.0787	-0.547482	-5.58459	0.584954	0.999316	0.000297041
HIIE	Post exercise	ARHGAP26	0.0968094	13.551	0.825938	-5.41297	0.410299	0.999316	0.000297041
HIIE	Post exercise	ARHGAP27	0.0511679	14.028	0.374501	-5.65631	0.70862	0.999316	0.000297041
HIIE	Post exercise	ARHGAP30	0.0450251	16.7127	0.3551	-5.66268	0.72307	0.999316	0.000297041
HIIE	Post exercise	ARHGAP35	0.0366381	14.049	0.631376	-5.54016	0.528863	0.999316	0.000297041
HIIE	Post exercise	ARHGAP4	0.0414236	15.9391	0.69272	-5.50369	0.489676	0.999316	0.000297041
HIIE	Post exercise	ARHGAP45	0.00726704	19.422	0.136749	-5.71104	0.891433	0.999316	0.000297041
HIIE	Post exercise	ARHGAP5	-0.0055209	14.3815	-0.0726795	-5.71709	0.942169	0.999316	0.000297041
HIIE	Post exercise	ARHGAP6	-0.0737952	17.8326	-0.469755	-5.62013	0.639289	0.999316	0.000297041
HIIE	Post exercise	ARHGAP9	0.0192893	15.3581	0.160263	-5.7079	0.872914	0.999316	0.000297041
HIIE	Post exercise	ARHGDIA	-0.0394296	20.8356	-0.805866	-5.42765	0.421738	0.999316	0.000297041
HIIE	Post exercise	ARHGEF1	0.0776265	17.5735	0.967077	-5.2997	0.335238	0.999316	0.000297041
HIIE	Post exercise	ARHGEF12	-0.0242173	15.576	-0.248575	-5.69163	0.804068	0.999316	0.000297041
HIIE	Post exercise	ARHGEF18	0.0510695	13.5664	0.53184	-5.59218	0.595711	0.999316	0.000297041
HIIE	Post exercise	ARHGEF6	0.0107857	16.824	0.123641	-5.71258	0.901783	0.999316	0.000297041
HIIE	Post exercise	ARHGEF7	-0.0213337	15.9594	-0.354808	-5.66278	0.723287	0.999316	0.000297041
HIIE	Post exercise	ARID1A	-0.00897808	15.2665	-0.100235	-5.71494	0.920306	0.999316	0.000297041
HIIE	Post exercise	ARID1B	0.138385	13.3295	0.639227	-5.53567	0.523761	0.999316	0.000297041
HIIE	Post exercise	ARID2	0.113252	13.3715	0.940293	-5.32255	0.34875	0.999316	0.000297041
HIIE	Post exercise	ARIH1	0.0899837	14.7529	0.891269	-5.36273	0.374373	0.999316	0.000297041
HIIE	Post exercise	ARIH2	-0.0172893	13.9685	-0.240116	-5.6935	0.810604	0.999316	0.000297041
HIIE	Post exercise	ARL13B	-0.1082	12.4998	-0.859485	-5.38764	0.391599	0.999316	0.000297041
HIIE	Post exercise	ARL15	0.0562131	15.1806	0.454998	-5.62627	0.649843	0.999316	0.000297041
HIIE	Post exercise	ARL3	-0.0465757	16.9144	-0.649359	-5.52981	0.517211	0.999316	0.000297041
HIIE	Post exercise	ARL6	0.0229908	12.6709	0.194869	-5.70236	0.845789	0.999316	0.000297041
HIIE	Post exercise	ARL6IP1	-0.161284	16.1298	-1.07792	-5.19845	0.282994	0.999316	0.000297041
HIIE	Post exercise	ARL6IP4	0.0623061	11.4959	0.308321	-5.67665	0.758314	0.999316	0.000297041
HIIE	Post exercise	ARL6IP5	-0.0119467	20.8327	-0.0768011	-5.71681	0.938896	0.999316	0.000297041
HIIE	Post exercise	ARL8A	-0.011919	18.4603	-0.224105	-5.69684	0.823015	0.999316	0.000297041
HIIE	Post exercise	ARMC1	0.0656761	14.782	0.624911	-5.5438	0.533086	0.999316	0.000297041
HIIE	Post exercise	ARMC10	0.0327312	15.2679	0.390714	-5.65073	0.696626	0.999316	0.000297041
HIIE	Post exercise	ARMC6	0.039415	14.2649	0.380036	-5.65443	0.704517	0.999316	0.000297041
HIIE	Post exercise	ARMC8	0.0284629	16.2525	0.463915	-5.62259	0.643456	0.999316	0.000297041
HIIE	Post exercise	ARMCX3	-0.102008	16.7686	-1.08789	-5.18881	0.278587	0.999316	0.000297041
HIIE	Post exercise	ARMH3	-0.0324199	13.3615	-0.437063	-5.63347	0.662764	0.999316	0.000297041
HIIE	Post exercise	ARMT1	0.0326435	15.2867	0.392896	-5.64996	0.695017	0.999316	0.000297041
HIIE	Post exercise	ARPC1A	0.108071	16.4696	1.05081	-5.22421	0.295229	0.999316	0.000297041
HIIE	Post exercise	ARPC1B	0.0662734	19.6788	0.556019	-5.58035	0.57912	0.999316	0.000297041
HIIE	Post exercise	ARPC2	0.0719079	21.8982	1.0614	-5.21422	0.290402	0.999316	0.000297041
HIIE	Post exercise	ARPC3	0.0384692	21.4934	0.507476	-5.60356	0.61265	0.999316	0.000297041
HIIE	Post exercise	ARPC4	0.0587437	22.5704	0.835406	-5.40593	0.404966	0.999316	0.000297041
HIIE	Post exercise	ARPC5	0.0777056	21.7066	0.886995	-5.36613	0.376662	0.999316	0.000297041
HIIE	Post exercise	ARPP19	0.0047288	15.9519	0.0492111	-5.71838	0.960824	0.999316	0.000297041
HIIE	Post exercise	ARRB1	-0.0402439	19.1316	-0.76002	-5.45983	0.448568	0.999316	0.000297041
HIIE	Post exercise	ARRB2	-0.0724869	15.5158	-0.635583	-5.53776	0.526126	0.999316	0.000297041
HIIE	Post exercise	ARRDC1	-0.0249343	14.8423	-0.393037	-5.64991	0.694912	0.999316	0.000297041
HIIE	Post exercise	ARSA	-0.0310336	15.3152	-0.300845	-5.6787	0.763996	0.999316	0.000297041
HIIE	Post exercise	ARSD	0.0937033	19.1561	0.722285	-5.48492	0.471371	0.999316	0.000297041
HIIE	Post exercise	ASAH1	-0.0700452	18.4285	-0.582471	-5.56682	0.561223	0.999316	0.000297041
HIIE	Post exercise	ASAP1	-0.0468005	17.5345	-0.598071	-5.55855	0.550796	0.999316	0.000297041
HIIE	Post exercise	ASAP2	-0.0297453	17.6102	-0.280935	-5.68392	0.779191	0.999316	0.000297041
HIIE	Post exercise	ASCC1	0.0328991	14.4039	0.605071	-5.55476	0.546148	0.999316	0.000297041
HIIE	Post exercise	ASCC3	-0.0236449	15.1041	-0.531184	-5.59249	0.596165	0.999316	0.000297041
HIIE	Post exercise	ASF1A	-0.161569	13.7501	-0.867298	-5.3816	0.38732	0.999316	0.000297041
HIIE	Post exercise	ASH2L	0.0528911	14.5323	0.422122	-5.63924	0.673609	0.999316	0.000297041
HIIE	Post exercise	ASNS	0.0139395	12.4872	0.0708979	-5.7172	0.943584	0.999316	0.000297041
HIIE	Post exercise	ATAD1	-0.0671981	15.6952	-1.00452	-5.26671	0.316928	0.999316	0.000297041
HIIE	Post exercise	ATAD3A	-0.0203783	18.1061	-0.283042	-5.68338	0.777579	0.999316	0.000297041
HIIE	Post exercise	ATG16L1	0.0402781	15.3771	0.720749	-5.48591	0.47231	0.999316	0.000297041
HIIE	Post exercise	ATG2B	0.0615765	13.7049	1.0054	-5.26592	0.316505	0.999316	0.000297041
HIIE	Post exercise	ATG3	0.00172267	16.0782	0.0200493	-5.71929	0.984034	0.999316	0.000297041
HIIE	Post exercise	ATG4B	0.0487805	15.4076	0.722569	-5.48474	0.471195	0.999316	0.000297041
HIIE	Post exercise	ATG4C	0.0284057	13.8864	0.364161	-5.65975	0.716308	0.999316	0.000297041
HIIE	Post exercise	ATG5	0.00152905	14.5475	0.0190264	-5.7193	0.984848	0.999316	0.000297041
HIIE	Post exercise	ATIC	-0.0212602	19.2227	-0.592188	-5.56169	0.554716	0.999316	0.000297041
HIIE	Post exercise	ATL1	-0.0562212	16.8467	-0.466384	-5.62155	0.641694	0.999316	0.000297041
HIIE	Post exercise	ATL2	0.0143517	15.733	0.176029	-5.70551	0.860535	0.999316	0.000297041
HIIE	Post exercise	ATL3	-0.0023404	18.0756	-0.0301385	-5.71906	0.976001	0.999316	0.000297041
HIIE	Post exercise	ATM	0.0962029	15.1498	0.964355	-5.30205	0.336595	0.999316	0.000297041
HIIE	Post exercise	ATOX1	-0.0367912	13.9157	-0.258934	-5.68927	0.796081	0.999316	0.000297041
HIIE	Post exercise	ATP11A	-0.0708942	15.5584	-1.05879	-5.21669	0.291586	0.999316	0.000297041
HIIE	Post exercise	ATP11C	-0.0172863	13.7441	-0.260846	-5.68882	0.794609	0.999316	0.000297041
HIIE	Post exercise	ATP13A1	-0.00276973	16.6998	-0.0573203	-5.71799	0.954375	0.999316	0.000297041
HIIE	Post exercise	ATP13A2	-0.02169	14.3432	-0.178434	-5.70512	0.85865	0.999316	0.000297041
HIIE	Post exercise	ATP1A1	-0.0177311	18.4979	-0.285535	-5.68275	0.775672	0.999316	0.000297041
HIIE	Post exercise	ATP1A3	0.0641026	15.3394	0.425871	-5.63781	0.670881	0.999316	0.000297041
HIIE	Post exercise	ATP1B1	0.138022	13.7533	0.898546	-5.3569	0.370497	0.999316	0.000297041
HIIE	Post exercise	ATP1B3	-0.0493331	16.9395	-0.609241	-5.55249	0.543391	0.999316	0.000297041
HIIE	Post exercise	ATP2A2	-0.041986	21.1504	-0.520403	-5.59758	0.603637	0.999316	0.000297041
HIIE	Post exercise	ATP2A3	-0.0575515	21.6167	-0.791347	-5.43804	0.430132	0.999316	0.000297041
HIIE	Post exercise	ATP2B1	-0.00661288	15.1371	-0.115697	-5.71344	0.908065	0.999316	0.000297041
HIIE	Post exercise	ATP2C1	-0.0626177	16.8276	-0.889578	-5.36408	0.375276	0.999316	0.000297041
HIIE	Post exercise	ATP5F1A	0.0278245	22.9795	0.360358	-5.66099	0.719143	0.999316	0.000297041
HIIE	Post exercise	ATP5F1B	0.141399	22.5646	0.939792	-5.32297	0.349006	0.999316	0.000297041
HIIE	Post exercise	ATP5F1C	-0.0400046	20.4343	-0.846609	-5.39748	0.398712	0.999316	0.000297041
HIIE	Post exercise	ATP5IF1	-0.047696	15.0869	-0.480322	-5.61562	0.631777	0.999316	0.000297041
HIIE	Post exercise	ATP5MF	-0.0147035	17.9436	-0.0735029	-5.71703	0.941515	0.999316	0.000297041
HIIE	Post exercise	ATP5MF-PTCD1	-0.0232204	19.5048	-0.333721	-5.66931	0.739108	0.999316	0.000297041
HIIE	Post exercise	ATP5MG	-0.0358332	20.5125	-0.890406	-5.36342	0.374833	0.999316	0.000297041
HIIE	Post exercise	ATP5MJ	-0.103238	16.6765	-0.392418	-5.65013	0.695369	0.999316	0.000297041
HIIE	Post exercise	ATP5PD	-0.00703021	14.9655	-0.0641118	-5.71761	0.948976	0.999316	0.000297041
HIIE	Post exercise	ATP5PF	0.0788993	14.6552	0.734325	-5.47705	0.464027	0.999316	0.000297041
HIIE	Post exercise	ATP5PO	0.0161706	19.1179	0.125876	-5.71233	0.900018	0.999316	0.000297041
HIIE	Post exercise	ATP6	0.0448647	17.9906	0.256635	-5.6898	0.797852	0.999316	0.000297041
HIIE	Post exercise	ATP6AP1	0.01296	16.3078	0.133976	-5.71138	0.893621	0.999316	0.000297041
HIIE	Post exercise	ATP6AP2	-0.0647647	14.9587	-0.612945	-5.55045	0.540946	0.999316	0.000297041
HIIE	Post exercise	ATP6V0A1	-0.0404319	17.534	-0.48999	-5.6114	0.624938	0.999316	0.000297041
HIIE	Post exercise	ATP6V0D1	-0.0410577	18.1093	-0.493264	-5.60995	0.622629	0.999316	0.000297041
HIIE	Post exercise	ATP6V1A	-0.0093989	19.0596	-0.102966	-5.71469	0.918143	0.999316	0.000297041
HIIE	Post exercise	ATP6V1B1	-0.21038	11.9241	-1.00118	-5.2697	0.318534	0.999316	0.000297041
HIIE	Post exercise	ATP6V1B2	0.00731759	17.9362	0.0939155	-5.71549	0.925316	0.999316	0.000297041
HIIE	Post exercise	ATP6V1C1	-0.0263758	16.2133	-0.349008	-5.66461	0.727628	0.999316	0.000297041
HIIE	Post exercise	ATP6V1D	-0.0685492	16.572	-0.914325	-5.3441	0.362178	0.999316	0.000297041
HIIE	Post exercise	ATP6V1E1	-0.0877525	17.1244	-1.10911	-5.16802	0.269359	0.999316	0.000297041
HIIE	Post exercise	ATP6V1H	-0.0564352	16.0553	-0.860183	-5.38711	0.391214	0.999316	0.000297041
HIIE	Post exercise	ATP8	0.00425533	16.3779	0.0184039	-5.71931	0.985344	0.999316	0.000297041
HIIE	Post exercise	ATP9B	-0.0884892	14.4686	-0.952522	-5.3122	0.342538	0.999316	0.000297041
HIIE	Post exercise	ATPAF2	-0.0439108	13.8473	-0.474696	-5.61804	0.635771	0.999316	0.000297041
HIIE	Post exercise	ATXN10	0.0540726	14.7846	0.666706	-5.51956	0.506099	0.999316	0.000297041
HIIE	Post exercise	ATXN3	-0.0559664	14.1256	-0.490981	-5.61096	0.624239	0.999316	0.000297041
HIIE	Post exercise	AUH	-0.000797774	15.0647	-0.0127835	-5.71939	0.989819	0.999316	0.000297041
HIIE	Post exercise	AUP1	-0.0136722	14.854	-0.179918	-5.70488	0.857487	0.999316	0.000297041
HIIE	Post exercise	AVL9	0.0738266	13.9972	0.660543	-5.52323	0.510033	0.999316	0.000297041
HIIE	Post exercise	AZU1	0.0514692	18.7983	0.203386	-5.70083	0.83914	0.999316	0.000297041
HIIE	Post exercise	B3GAT3	-0.0257578	15.5568	-0.411487	-5.64323	0.681368	0.999316	0.000297041
HIIE	Post exercise	B3GNT2	-0.0653107	13.6621	-0.702615	-5.4975	0.483506	0.999316	0.000297041
HIIE	Post exercise	B4GALT7	-0.0733284	13.8506	-0.92684	-5.33379	0.355664	0.999316	0.000297041
HIIE	Post exercise	BABAM1	-0.0743381	13.83	-0.703037	-5.49723	0.483245	0.999316	0.000297041
HIIE	Post exercise	BACH1	-0.0863071	12.7819	-0.638748	-5.53595	0.524071	0.999316	0.000297041
HIIE	Post exercise	BAD	-0.0481687	14.0616	-0.22543	-5.69657	0.821986	0.999316	0.000297041
HIIE	Post exercise	BAG1	0.0269474	16.12	0.23527	-5.69453	0.814357	0.999316	0.000297041
HIIE	Post exercise	BAG5	0.0544352	15.5295	0.998938	-5.27171	0.319612	0.999316	0.000297041
HIIE	Post exercise	BAG6	0.0609043	16.006	0.721217	-5.48561	0.472025	0.999316	0.000297041
[truncated: 22,157 more rows]

## Sheet: Interaction effects
Timepoint	Higher in	Protein	log2FC	AveExpr	t	B	P.Value	adj.P.Val	log10.adj.pval
1h post exercise	HIIE	BST2	1.92177	14.8597	6.32792	10.3605	3.41329e-09	9.72446e-06	5.01213
1h post exercise	MICE	RNF14	-2.53784	11.5302	-6.32658	10.3545	3.43626e-09	9.72446e-06	5.01213
1h post exercise	HIIE	C1orf35	1.77584	13.0712	6.25817	10.0483	4.83083e-09	9.72446e-06	5.01213
1h post exercise	HIIE	ZMYM3	1.25576	12.8644	5.60847	7.23072	1.11224e-07	0.00016792	3.7749
1h post exercise	MICE	APOA2	-1.29331	15.0231	-5.39804	6.35651	2.94752e-07	0.000356002	3.44855
1h post exercise	MICE	SH2D1B	-1.24569	13.3667	-5.1285	5.2672	9.94426e-07	0.00100089	2.99961
1h post exercise	MICE	PIK3R2	-1.41969	10.4317	-4.99584	4.74431	1.78416e-06	0.00153922	2.8127
1h post exercise	MICE	TRMT61B	-0.726239	12.9203	-4.93309	4.5011	2.34195e-06	0.00159441	2.7974
1h post exercise	MICE	ATP1A3	-1.05133	15.3394	-4.90675	4.39826	2.62783e-06	0.00159441	2.7974
1h post exercise	HIIE	TLR1	1.06161	14.0454	4.90567	4.39407	2.64019e-06	0.00159441	2.7974
1h post exercise	HIIE	TASP1	1.37727	12.094	4.76127	3.84224	4.89876e-06	0.00265886	2.5753
1h post exercise	HIIE	KRT2	1.60473	12.6366	4.74343	3.77482	5.28339e-06	0.00265886	2.5753
1h post exercise	MICE	ASNS	-1.25479	12.4872	-4.48342	2.81282	1.5561e-05	0.00722866	2.14094
1h post exercise	HIIE	POM121C	0.721625	12.6986	4.40428	2.52803	2.14388e-05	0.00924776	2.03396
1h post exercise	HIIE	SIRPB1	0.818207	14.6389	4.26196	2.02441	3.78215e-05	0.014305	1.84451
1h post exercise	HIIE	ATAD2	0.886838	15.0598	4.26143	2.02256	3.79004e-05	0.014305	1.84451
1h post exercise	HIIE	CCDC97	0.664629	12.1093	4.22928	1.9112	4.29728e-05	0.0150458	1.82258
1h post exercise	HIIE	TCEAL3	0.898069	12.335	4.20514	1.82689	4.72691e-05	0.0150458	1.82258
1h post exercise	HIIE	CD302	0.850767	12.7177	4.20477	1.82561	4.73374e-05	0.0150458	1.82258
Post exercise	HIIE	BST2	1.4027	14.8597	4.64899	2.7758	7.85772e-06	0.0224387	1.649
Post exercise	HIIE	MARF1	0.958231	17.7575	4.60298	2.62664	9.51617e-06	0.0224387	1.649
Post exercise	HIIE	VMA21	0.921917	14.7105	4.56475	2.50346	1.11469e-05	0.0224387	1.649
1h post exercise	HIIE	FBXO30	1.00227	13.0592	4.07278	1.37453	7.8835e-05	0.0238042	1.62335
Post exercise	HIIE	SYTL2	1.19498	11.4129	4.41344	2.02288	2.06691e-05	0.0312051	1.50577
1h post exercise	HIIE	MTR	1.29908	11.6393	3.97878	1.06002	0.000112589	0.0323775	1.48976
1h post exercise	MICE	PRMT2	-0.535165	13.9426	-3.94913	0.96221	0.000125799	0.0345319	1.46178
Post exercise	MICE	FAM118A	-0.874344	11.6946	-4.31334	1.71117	3.08615e-05	0.0372745	1.42859
1h post exercise	MICE	CFAP410	-0.541465	12.9763	-3.91643	0.855013	0.000142074	0.0373037	1.42825
1h post exercise	HIIE	FUT11	0.569713	13.1469	3.88359	0.747638	0.000160511	0.0403886	1.39374
1h post exercise	MICE	APOL1	-1.47701	18.3592	-3.8252	0.558463	0.000199051	0.0480828	1.31801
1h post exercise	MICE	ABI3	-0.857043	13.6606	-3.77475	0.397085	0.000239207	0.0542676	1.26546
1h post exercise	HIIE	LRRC75A	1.02399	12.6771	3.77083	0.384625	0.000242627	0.0542676	1.26546
1h post exercise	HIIE	TPRA1	0.600933	13.9167	3.72061	0.225816	0.000290791	0.0627174	1.20261
Post exercise	HIIE	CD99	1.20461	12.4064	4.06796	0.96887	8.02985e-05	0.0701128	1.1542
Post exercise	MICE	TRMT61B	-0.594501	12.9203	-4.06465	0.959543	8.12701e-05	0.0701128	1.1542
1h post exercise	HIIE	VAMP5	0.649883	14.3282	3.65917	0.0338503	0.000362057	0.0736736	1.13269
1h post exercise	HIIE	TELO2	0.757731	11.4996	3.65612	0.0243969	0.000365989	0.0736736	1.13269
1h post exercise	HIIE	NTMT1	0.635927	13.5036	3.64512	-0.00970608	0.000380538	0.0741312	1.13
1h post exercise	MICE	DHRS13	-0.393835	12.8257	-3.59732	-0.156469	0.000450069	0.0849365	1.07091
Post exercise	HIIE	VRK2	0.825421	12.3822	3.94717	0.615268	0.00012676	0.0920999	1.03574
Post exercise	MICE	TXLNG	-0.984284	13.3472	-3.90969	0.507176	0.000145769	0.0920999	1.03574
Post exercise	HIIE	GRK4	1.08512	12.8567	3.89751	0.472221	0.000152509	0.0920999	1.03574
1h post exercise	MICE	GET1	-0.69184	15.4301	-3.56223	-0.263775	0.000508961	0.0931399	1.03086
1h post exercise	HIIE	MRPL35	0.617168	14.2179	3.53274	-0.353029	0.000563793	0.0972473	1.01212
1h post exercise	MICE	SLC35A3	-1.23693	14.5881	-3.52507	-0.376159	0.000578951	0.0972473	1.01212
1h post exercise	HIIE	POGLUT2	0.85008	13.9282	3.52468	-0.37731	0.000579716	0.0972473	1.01212
1h post exercise	MICE	ATP6V1B1	-1.04999	11.9241	-3.51031	-0.42052	0.000609182	0.0994283	1.00249
1h post exercise	HIIE	RSPRY1	0.536828	13.1568	3.49124	-0.477473	0.00065032	0.10335	0.985691
1h post exercise	HIIE	CHCHD1	0.526856	14.5031	3.47842	-0.515834	0.000679634	0.105239	0.977825
1h post exercise	MICE	SENP3	-0.617546	11.8935	-3.46765	-0.547725	0.000704973	0.106433	0.972922
1h post exercise	MICE	SCAF8	-0.749622	12.4324	-3.41985	-0.689058	0.000829422	0.119385	0.92305
1h post exercise	HIIE	WDFY2	0.294746	13.9114	3.41421	-0.705345	0.000845059	0.119385	0.92305
1h post exercise	HIIE	NT5M	0.547238	12.1556	3.41246	-0.710476	0.000850068	0.119385	0.92305
1h post exercise	HIIE	VMA21	0.690298	14.7105	3.3957	-0.759759	0.000899762	0.120849	0.917757
1h post exercise	MICE	INTS2	-0.582955	14.7505	-3.39467	-0.762759	0.000902877	0.120849	0.917757
1h post exercise	MICE	LYSMD2	-0.656338	13.8118	-3.37907	-0.808218	0.000951426	0.120849	0.917757
1h post exercise	HIIE	PPP2R2D	0.668037	15.2881	3.36572	-0.846976	0.000994897	0.120849	0.917757
1h post exercise	HIIE	KRT5	0.799895	12.7875	3.36431	-0.851055	0.000999587	0.120849	0.917757
1h post exercise	HIIE	TMEM168	0.577319	14.1152	3.35887	-0.866807	0.00101791	0.120849	0.917757
1h post exercise	HIIE	PIP4K2B	0.306748	14.438	3.35819	-0.868506	0.00101984	0.120849	0.917757
1h post exercise	HIIE	ACTR6	0.94585	12.7148	3.3533	-0.8829	0.00103698	0.120849	0.917757
1h post exercise	MICE	ARL13B	-0.599645	12.4998	-3.34626	-0.903219	0.00106157	0.120849	0.917757
1h post exercise	HIIE	ATP13A2	0.578643	14.3432	3.34412	-0.909382	0.00106915	0.120849	0.917757
1h post exercise	HIIE	FXN	0.549603	13.7844	3.34092	-0.918628	0.00108062	0.120849	0.917757
Post exercise	HIIE	CCDC97	0.591201	12.1093	3.78665	0.158278	0.00022897	0.125704	0.90065
1h post exercise	HIIE	KLC4	0.75727	12.1016	3.3216	-0.97412	0.0011521	0.126501	0.897906
1h post exercise	HIIE	ELOVL5	0.612895	14.5387	3.30315	-1.02688	0.0012245	0.128725	0.890338
1h post exercise	HIIE	AFG2B	0.518614	13.3473	3.29877	-1.03937	0.0012423	0.128725	0.890338
1h post exercise	MICE	CCDC134	-0.666957	13.1295	-3.29768	-1.04248	0.00124678	0.128725	0.890338
1h post exercise	HIIE	GUF1	0.603674	13.0785	3.29505	-1.04997	0.00125762	0.128725	0.890338
1h post exercise	HIIE	DNTTIP1	0.669482	13.038	3.27277	-1.11323	0.00135306	0.136185	0.865871
1h post exercise	HIIE	UBE2E1	0.9169	12.7377	3.22365	-1.25138	0.00158776	0.157189	0.803579
1h post exercise	MICE	RAC2	-0.53349	21.2518	-3.21097	-1.28676	0.00165424	0.161128	0.792829
1h post exercise	HIIE	PAIP1	0.386647	15.6042	3.2039	-1.30644	0.00169242	0.162231	0.789867
Post exercise	HIIE	KLHDC4	0.585649	12.7381	3.68972	-0.111057	0.000324701	0.163406	0.786732
1h post exercise	HIIE	LILRA3	0.870955	14.7864	3.18878	-1.34838	0.00177681	0.167196	0.776774
1h post exercise	HIIE	FKBP7	0.55189	12.3436	3.18478	-1.35938	0.00179959	0.167196	0.776774
1h post exercise	HIIE	REEP6	0.551877	12.1815	3.15157	-1.45084	0.00200129	0.181817	0.740365
1h post exercise	HIIE	TMEM87A	0.534354	14.041	3.145	-1.46891	0.00204383	0.181817	0.740365
1h post exercise	HIIE	EPN1	1.05428	14.8087	3.13424	-1.49833	0.00211496	0.181817	0.740365
1h post exercise	HIIE	POLR1G	0.559515	14.751	3.13366	-1.49989	0.0021188	0.181817	0.740365
1h post exercise	HIIE	PTGIR	0.512363	12.3046	3.13168	-1.50516	0.00213172	0.181817	0.740365
1h post exercise	HIIE	LILRB1	0.987725	12.5508	3.13088	-1.50749	0.00213761	0.181817	0.740365
1h post exercise	HIIE	PTGR2	0.471503	12.7449	3.12442	-1.52491	0.00218125	0.182952	0.737663
1h post exercise	HIIE	CHP1	0.445218	14.265	3.119	-1.53983	0.00221958	0.183617	0.736087
1h post exercise	HIIE	CENPA	0.72667	9.96592	3.11047	-1.56288	0.00227988	0.186057	0.730355
1h post exercise	HIIE	ASCC2	0.425436	13.9766	3.09083	-1.61599	0.00242538	0.187742	0.726438
1h post exercise	HIIE	DNAAF10	0.351211	13.9414	3.09057	-1.61659	0.00242698	0.187742	0.726438
1h post exercise	MICE	GTPBP6	-0.490248	12.904	-3.08601	-1.62899	0.00246238	0.187742	0.726438
1h post exercise	HIIE	WRAP53	0.718159	13.1138	3.08451	-1.6331	0.00247428	0.187742	0.726438
1h post exercise	HIIE	IFIT3	0.461794	13.0273	3.07743	-1.65202	0.00252936	0.187742	0.726438
1h post exercise	MICE	ATP8	-1.01268	16.3779	-3.07681	-1.6538	0.00253471	0.187742	0.726438
1h post exercise	HIIE	EZH1	0.800211	12.7486	3.0734	-1.66296	0.00256193	0.187742	0.726438
1h post exercise	MICE	SMIM5	-2.07212	13.7438	-3.06776	-1.67807	0.00260749	0.187742	0.726438
1h post exercise	MICE	SGF29	-0.545361	13.9386	-3.06467	-1.68635	0.00263279	0.187742	0.726438
1h post exercise	MICE	RASA2	-0.286554	14.8795	-3.06424	-1.68735	0.00263569	0.187742	0.726438
1h post exercise	MICE	UCKL1	-0.510387	13.2308	-3.06349	-1.68951	0.00264251	0.187742	0.726438
1h post exercise	HIIE	APBA2	1.59018	12.4233	3.04149	-1.7482	0.00282988	0.198717	0.701766
1h post exercise	HIIE	STAMBP	0.195834	16.093	3.02998	-1.77861	0.00293202	0.199789	0.699428
1h post exercise	MICE	RUNX2	-0.488791	17.5957	-3.02697	-1.78672	0.00296012	0.199789	0.699428
1h post exercise	HIIE	SEPHS2	0.481413	14.2673	3.0256	-1.79035	0.00297272	0.199789	0.699428
1h post exercise	HIIE	APPL1	0.169784	17.519	3.025	-1.79177	0.00297749	0.199789	0.699428
1h post exercise	HIIE	ASRGL1	0.408882	15.2176	3.01795	-1.81059	0.00304387	0.201999	0.694651
1h post exercise	MICE	HECA	-0.5905	13.5433	-3.01064	-1.82987	0.00311327	0.204359	0.689606
1h post exercise	MICE	AGFG2	-0.42826	12.6466	-2.98625	-1.8938	0.0033549	0.216386	0.664771
1h post exercise	MICE	STAP1	-1.82266	11.304	-2.98504	-1.89712	0.00336815	0.216386	0.664771
1h post exercise	HIIE	SMAD4	0.817853	13.4012	2.9804	-1.90926	0.00341637	0.217173	0.663194
1h post exercise	MICE	IRF9	-0.784548	13.3744	-2.96913	-1.93863	0.00353599	0.220986	0.655635
1h post exercise	MICE	ATG4D	-0.398103	13.1985	-2.96781	-1.94195	0.00354954	0.220986	0.655635
1h post exercise	HIIE	AKAP7	0.589588	13.4462	2.95994	-1.96256	0.00363655	0.224093	0.649572
1h post exercise	HIIE	PPP1R7	0.215991	18.2623	2.9489	-1.99104	0.00375983	0.22935	0.639501
1h post exercise	HIIE	TIMM22	0.375358	15.8762	2.94278	-2.00701	0.00383113	0.231362	0.635708
Post exercise	HIIE	WDR24	0.471064	13.0485	3.53702	-0.523708	0.000555276	0.242707	0.614918
Post exercise	MICE	MAP3K2	-1.08986	15.4551	-3.53332	-0.533825	0.000562659	0.242707	0.614918
1h post exercise	HIIE	D2HGDH	0.391184	13.993	2.92172	-2.0612	0.00408265	0.24411	0.612415
1h post exercise	HIIE	CHSY1	0.451552	14.0144	2.91635	-2.07506	0.00414976	0.24569	0.609612
1h post exercise	MICE	NUBP1	-0.689935	16.3123	-2.90934	-2.093	0.0042382	0.247648	0.606166
1h post exercise	HIIE	APOL2	0.549526	12.7893	2.90436	-2.10573	0.00430206	0.247648	0.606166
1h post exercise	HIIE	TIMM21	0.361641	15.1679	2.90407	-2.10648	0.00430585	0.247648	0.606166
1h post exercise	HIIE	STBD1	0.7553	13.165	2.89858	-2.12048	0.00437732	0.249383	0.603133
1h post exercise	MICE	RPS6KA5	-0.829107	16.9952	-2.89133	-2.13896	0.0044735	0.250924	0.600458
1h post exercise	MICE	MAST3	-0.830106	15.4057	-2.88731	-2.1492	0.00452771	0.250924	0.600458
1h post exercise	HIIE	KXD1	0.85747	13.209	2.88721	-2.14944	0.00452901	0.250924	0.600458
1h post exercise	HIIE	IFIT1	0.62769	12.0069	2.88081	-2.1657	0.00461649	0.253445	0.596116
1h post exercise	HIIE	TMEM104	0.391171	20.0032	2.87563	-2.17883	0.0046884	0.254724	0.593929
1h post exercise	HIIE	UQCRH	0.857211	13.6413	2.87308	-2.18528	0.00472415	0.254724	0.593929
1h post exercise	HIIE	CEP135	0.896606	13.0151	2.86786	-2.19848	0.00479816	0.255611	0.592421
1h post exercise	MICE	CNNM3	-0.458286	12.4855	-2.86592	-2.20329	0.00482524	0.255611	0.592421
1h post exercise	HIIE	MYDGF	0.243067	18.491	2.86142	-2.21462	0.00488997	0.256787	0.590427
1h post exercise	HIIE	GNAI3	0.370378	17.7422	2.84978	-2.24403	0.00506272	0.263567	0.579109
1h post exercise	HIIE	RAB39A	0.730515	15.5345	2.84625	-2.25289	0.00511586	0.263957	0.578467
1h post exercise	HIIE	PEX11B	0.218514	16.9675	2.84344	-2.25983	0.00515762	0.263957	0.578467
1h post exercise	HIIE	RNF7	1.36465	14.029	2.84008	-2.26836	0.00521007	0.2644	0.577738
1h post exercise	HIIE	COQ9	0.505542	14.1267	2.83542	-2.28003	0.0052823	0.265832	0.575393
1h post exercise	HIIE	GPR108	0.244426	15.9752	2.82817	-2.29805	0.00539549	0.269284	0.569789
1h post exercise	HIIE	FCGRT	0.572911	14.8446	2.81904	-2.32092	0.00554348	0.274402	0.561612
1h post exercise	MICE	TMEM11	-0.427328	15.7165	-2.80895	-2.34599	0.00571008	0.27893	0.554504
1h post exercise	HIIE	CHMP7	0.40319	12.8763	2.80785	-2.34859	0.00572734	0.27893	0.554504
1h post exercise	HIIE	PRKX	1.00483	13.7356	2.79861	-2.37161	0.00588561	0.279547	0.553546
1h post exercise	HIIE	SPTLC2	0.205762	15.0468	2.79617	-2.37753	0.00592661	0.279547	0.553546
1h post exercise	HIIE	TAB2	0.592064	13.6643	2.79281	-2.38594	0.00598619	0.279547	0.553546
1h post exercise	HIIE	FTH1	0.461635	13.0482	2.79114	-2.39006	0.00601544	0.279547	0.553546
1h post exercise	HIIE	CAPN7	0.223013	15.1758	2.79088	-2.39058	0.00601879	0.279547	0.553546
1h post exercise	HIIE	CCDC90B	0.575678	12.5741	2.78842	-2.39676	0.00606329	0.279547	0.553546
1h post exercise	HIIE	PIKFYVE	0.442323	14.3182	2.78838	-2.39686	0.00606402	0.279547	0.553546
1h post exercise	HIIE	FAM210A	0.327644	15.594	2.78568	-2.40351	0.00611188	0.279619	0.553434
1h post exercise	HIIE	CD93	0.489955	17.6722	2.78288	-2.41041	0.00616201	0.279792	0.553165
1h post exercise	MICE	TAFAZZIN	-0.358775	12.5898	-2.77818	-2.42185	0.00624565	0.281474	0.550562
1h post exercise	MICE	PTPRG	-0.808793	13.4885	-2.76962	-2.44297	0.00640411	0.286477	0.54291
1h post exercise	MICE	YARS2	-0.378844	13.7621	-2.76666	-2.45015	0.00645863	0.286792	0.542433
1h post exercise	HIIE	CERT1	0.283215	15.4318	2.76174	-2.46215	0.00655098	0.288769	0.539449
1h post exercise	HIIE	RRAGC	0.409109	13.9548	2.7582	-2.47091	0.00661958	0.289622	0.538169
1h post exercise	MICE	LPCAT1	-0.404599	15.5059	-2.75577	-2.47683	0.00666624	0.289622	0.538169
1h post exercise	HIIE	EMC1	0.195379	17.9881	2.74465	-2.5038	0.00688244	0.296879	0.527421
1h post exercise	MICE	RETREG3	-0.382611	16.6739	-2.72992	-2.53964	0.00718174	0.306454	0.513634
1h post exercise	HIIE	DCAF7	0.235982	15.2917	2.72869	-2.54251	0.00720592	0.306454	0.513634
1h post exercise	HIIE	TMED7	0.221668	18.0935	2.7254	-2.55046	0.00727423	0.307196	0.512584
1h post exercise	MICE	TXNDC9	-0.417162	14.8137	-2.71377	-2.57859	0.00752177	0.313028	0.504417
1h post exercise	HIIE	GPX4	0.23432	18.0519	2.71201	-2.58273	0.00755847	0.313028	0.504417
1h post exercise	HIIE	CD180	0.662718	14.0126	2.71164	-2.58373	0.00756782	0.313028	0.504417
1h post exercise	MICE	SLC35B4	-0.374713	16.1707	-2.70391	-2.6023	0.00773669	0.31612	0.500149
1h post exercise	HIIE	VPS25	0.395693	15.3567	2.70343	-2.60345	0.00774726	0.31612	0.500149
1h post exercise	MICE	XIAP	-0.684072	13.7639	-2.69842	-2.61545	0.00785861	0.318511	0.496875
1h post exercise	HIIE	VPS26B	0.180294	17.4211	2.6878	-2.64075	0.00809828	0.326037	0.486733
1h post exercise	HIIE	ALCAM	0.403144	14.3313	2.68271	-2.65296	0.00821725	0.328636	0.483285
1h post exercise	MICE	CHCHD2	-0.699154	15.893	-2.67705	-2.66642	0.00835004	0.330442	0.480905
1h post exercise	MICE	THNSL1	-0.271089	13.7164	-2.67608	-2.66866	0.00837185	0.330442	0.480905
1h post exercise	HIIE	TTC1	0.322778	14.9233	2.66007	-2.70668	0.00876022	0.340142	0.468339
1h post exercise	HIIE	DLD	0.240464	19.7742	2.65876	-2.70969	0.00879132	0.340142	0.468339
1h post exercise	HIIE	MOB4	0.264663	16.6999	2.65728	-2.71322	0.00882854	0.340142	0.468339
1h post exercise	HIIE	WRAP73	0.50888	13.7965	2.65287	-2.72368	0.00893969	0.340142	0.468339
1h post exercise	HIIE	PXMP2	0.344404	13.8435	2.6513	-2.72732	0.00897814	0.340142	0.468339
1h post exercise	HIIE	TXNRD2	0.306541	15.0557	2.64907	-2.73261	0.00903518	0.340142	0.468339
1h post exercise	HIIE	ERLIN1	0.354828	16.9437	2.64726	-2.73691	0.00908188	0.340142	0.468339
1h post exercise	MICE	DDX20	-0.464804	12.8801	-2.64434	-2.74379	0.00915669	0.340142	0.468339
1h post exercise	HIIE	PTEN	0.216318	14.2451	2.63415	-2.76761	0.00942034	0.340142	0.468339
1h post exercise	HIIE	ERLIN2	0.262525	16.9803	2.63407	-2.76784	0.0094231	0.340142	0.468339
1h post exercise	HIIE	TMEM179B	0.573054	14.3561	2.63325	-2.7698	0.0094455	0.340142	0.468339
1h post exercise	HIIE	GADD45GIP1	0.351613	15.03	2.63054	-2.77616	0.00951747	0.340142	0.468339
1h post exercise	MICE	RNASEH2A	-0.450245	14.3411	-2.62875	-2.78034	0.00956515	0.340142	0.468339
1h post exercise	HIIE	CD101	0.612175	13.8313	2.62871	-2.78044	0.00956628	0.340142	0.468339
1h post exercise	MICE	ORC3	-0.377964	12.4008	-2.6283	-2.78131	0.00957566	0.340142	0.468339
1h post exercise	HIIE	ENO3	0.322857	18.6406	2.62442	-2.79047	0.00968151	0.340142	0.468339
1h post exercise	HIIE	RIOK3	0.403806	14.5427	2.6243	-2.79075	0.00968475	0.340142	0.468339
1h post exercise	HIIE	SCARB2	0.38306	15.0004	2.62409	-2.79124	0.00969044	0.340142	0.468339
1h post exercise	HIIE	WDR20	0.434576	13.8777	2.62274	-2.79438	0.00972688	0.340142	0.468339
1h post exercise	HIIE	MRPL44	0.314854	15.6801	2.61681	-2.80822	0.00988912	0.340142	0.468339
1h post exercise	HIIE	UFD1	0.165742	16.4305	2.61648	-2.80891	0.00989683	0.340142	0.468339
1h post exercise	HIIE	LILRB2	0.560022	14.4468	2.61205	-2.8193	0.010021	0.340142	0.468339
1h post exercise	HIIE	AP1M2	0.352377	13.2462	2.61173	-2.81995	0.0100283	0.340142	0.468339
1h post exercise	HIIE	LAMP2	0.450394	18.7486	2.61034	-2.82327	0.0100687	0.340142	0.468339
1h post exercise	HIIE	SLC7A5	0.258045	14.4034	2.6101	-2.82375	0.010074	0.340142	0.468339
1h post exercise	HIIE	GDE1	0.265072	15.3511	2.60981	-2.82442	0.010082	0.340142	0.468339
1h post exercise	HIIE	PPP4R2	0.79025	14.2685	2.59919	-2.84913	0.0103851	0.342505	0.465334
1h post exercise	HIIE	DEFA3	1.7964	21.5578	2.59872	-2.85022	0.0103986	0.342505	0.465334
1h post exercise	HIIE	DAGLB	0.193654	15.3215	2.59851	-2.85064	0.0104033	0.342505	0.465334
1h post exercise	HIIE	PRKAG2	0.327497	13.2922	2.59688	-2.85441	0.0104504	0.342505	0.465334
1h post exercise	MICE	MRPL1	-0.244651	15.3896	-2.59596	-2.85654	0.010477	0.342505	0.465334
1h post exercise	MICE	PEX6	-0.463013	11.828	-2.59546	-2.85774	0.0104924	0.342505	0.465334
1h post exercise	HIIE	PITHD1	0.238375	17.0111	2.59049	-2.86917	0.0106367	0.343836	0.463648
1h post exercise	MICE	PHB1	-0.548685	20.4566	-2.58893	-2.87286	0.0106843	0.343836	0.463648
1h post exercise	HIIE	LMAN2L	0.256151	15.6359	2.58821	-2.87443	0.010704	0.343836	0.463648
1h post exercise	HIIE	RAD23A	0.323969	17.4641	2.57836	-2.8972	0.0110005	0.351139	0.454521
1h post exercise	HIIE	BTN3A3	0.224897	15.8764	2.57676	-2.90081	0.0110476	0.351139	0.454521
1h post exercise	MICE	SEPTIN4	-0.524669	12.4903	-2.56942	-2.91772	0.0112745	0.352392	0.452975
1h post exercise	HIIE	CLCN7	0.234759	16.1732	2.56871	-2.91928	0.011295	0.352392	0.452975
1h post exercise	HIIE	PPAN	0.642178	13.0778	2.56716	-2.92291	0.0113448	0.352392	0.452975
1h post exercise	HIIE	PI4K2A	0.215087	15.1818	2.56606	-2.92533	0.0113774	0.352392	0.452975
1h post exercise	HIIE	PSMA5	0.266554	18.5713	2.56606	-2.9254	0.0113788	0.352392	0.452975
1h post exercise	MICE	SYS1	-0.458008	14.0975	-2.55977	-2.9398	0.0115772	0.356348	0.448126
1h post exercise	MICE	BAZ2A	-0.516197	13.2326	-2.55484	-2.95104	0.0117343	0.356348	0.448126
1h post exercise	HIIE	PAAF1	0.22157	16.1092	2.55417	-2.95249	0.0117543	0.356348	0.448126
1h post exercise	HIIE	ORM1	0.609787	15.5357	2.55273	-2.95585	0.0118023	0.356348	0.448126
1h post exercise	HIIE	GTF2A2	0.574849	13.6944	2.55102	-2.95976	0.0118578	0.356348	0.448126
1h post exercise	HIIE	MCEMP1	0.480038	16.0734	2.54645	-2.97015	0.0120067	0.356348	0.448126
1h post exercise	HIIE	SIRPA	0.575513	15.146	2.54621	-2.9707	0.0120147	0.356348	0.448126
1h post exercise	MICE	RABL3	-0.571907	16.0381	-2.54325	-2.97743	0.0121122	0.356348	0.448126
1h post exercise	HIIE	CHMP4A	0.519629	15.4344	2.54212	-2.97999	0.0121495	0.356348	0.448126
1h post exercise	HIIE	CD300A	0.666882	13.7296	2.54196	-2.98034	0.0121546	0.356348	0.448126
1h post exercise	HIIE	TMEM147	0.920682	12.9771	2.53656	-2.9926	0.0123351	0.356348	0.448126
1h post exercise	MICE	CKB	-1.30512	14.664	-2.53202	-3.00287	0.0124883	0.356348	0.448126
1h post exercise	HIIE	CST3	0.541125	16.36	2.53081	-3.0056	0.0125294	0.356348	0.448126
1h post exercise	MICE	TAF15	-0.405678	18.5585	-2.53007	-3.00728	0.0125547	0.356348	0.448126
1h post exercise	HIIE	THEM6	0.321893	16.8045	2.52874	-3.01029	0.0126002	0.356348	0.448126
1h post exercise	HIIE	TRAPPC4	0.174904	16.5544	2.5284	-3.01099	0.0126102	0.356348	0.448126
1h post exercise	HIIE	FBXO45	0.161246	14.1721	2.52773	-3.0125	0.0126332	0.356348	0.448126
1h post exercise	HIIE	NLN	0.301809	15.4358	2.52711	-3.01395	0.0126559	0.356348	0.448126
1h post exercise	HIIE	NMRAL1	0.554668	14.1883	2.52579	-3.01694	0.0127014	0.356348	0.448126
1h post exercise	HIIE	RXRA	0.632021	12.5973	2.51897	-3.03231	0.0129385	0.356348	0.448126
1h post exercise	HIIE	LILRB3	0.660556	12.9236	2.51896	-3.03234	0.012939	0.356348	0.448126
1h post exercise	HIIE	UBE2G1	0.395034	14.2689	2.51771	-3.03515	0.0129828	0.356348	0.448126
1h post exercise	HIIE	SYNGR2	0.385304	17.7277	2.51112	-3.04996	0.0132163	0.356348	0.448126
1h post exercise	HIIE	TMED4	0.252954	17.0814	2.50924	-3.05414	0.0132828	0.356348	0.448126
1h post exercise	HIIE	ATP1B1	0.54804	13.7533	2.50643	-3.06048	0.0133849	0.356348	0.448126
1h post exercise	HIIE	SRPRB	0.171812	17.108	2.50301	-3.06807	0.0135072	0.356348	0.448126
1h post exercise	HIIE	CDC42BPA	0.272696	15.9186	2.50206	-3.07025	0.0135433	0.356348	0.448126
1h post exercise	MICE	KRTCAP2	-0.577412	15.0272	-2.50103	-3.07257	0.0135813	0.356348	0.448126
1h post exercise	MICE	RBM34	-0.476206	13.3237	-2.49612	-3.08353	0.013762	0.356348	0.448126
1h post exercise	MICE	ACAT1	-0.57537	17.2606	-2.4951	-3.08581	0.0137998	0.356348	0.448126
1h post exercise	HIIE	MOSPD2	0.172005	15.7072	2.49354	-3.08924	0.0138563	0.356348	0.448126
1h post exercise	HIIE	TREX1	0.42231	14.0144	2.49194	-3.09288	0.0139179	0.356348	0.448126
1h post exercise	HIIE	COMMD5	0.2126	15.1433	2.4914	-3.09401	0.0139362	0.356348	0.448126
1h post exercise	HIIE	DNASE1	0.873012	12.3346	2.48703	-3.10381	0.0141026	0.356348	0.448126
1h post exercise	HIIE	DERL2	0.581514	14.9631	2.48666	-3.10462	0.0141164	0.356348	0.448126
1h post exercise	MICE	GPAT4	-0.320352	13.8386	-2.48448	-3.10942	0.0141979	0.356348	0.448126
1h post exercise	HIIE	CCDC88A	0.226286	14.0661	2.48429	-3.10984	0.014205	0.356348	0.448126
1h post exercise	MICE	RANBP1	-0.506627	18.0177	-2.48363	-3.11136	0.0142318	0.356348	0.448126
1h post exercise	HIIE	GCA	0.521297	17.6438	2.48344	-3.11178	0.0142389	0.356348	0.448126
1h post exercise	HIIE	HYI	0.512413	14.6188	2.48128	-3.11658	0.0143217	0.356348	0.448126
1h post exercise	HIIE	PLTP	0.4411	14.2372	2.48005	-3.11932	0.0143691	0.356348	0.448126
1h post exercise	HIIE	M6PR	0.336146	17.6996	2.47813	-3.12358	0.0144432	0.356348	0.448126
1h post exercise	HIIE	TRMT2A	0.461684	12.5704	2.47772	-3.12449	0.0144591	0.356348	0.448126
1h post exercise	HIIE	APOD	0.426787	16.4848	2.47558	-3.12923	0.0145421	0.356348	0.448126
1h post exercise	HIIE	PPIL1	0.435708	16.9585	2.47554	-3.12932	0.0145437	0.356348	0.448126
1h post exercise	HIIE	RAF1	0.538477	13.5891	2.47344	-3.13396	0.0146254	0.356348	0.448126
1h post exercise	HIIE	EPHX1	0.232273	16.7674	2.47303	-3.13481	0.0146398	0.356348	0.448126
1h post exercise	HIIE	KCNA1	0.228173	15.2671	2.47288	-3.13514	0.0146455	0.356348	0.448126
1h post exercise	MICE	LYPLA1	-0.455891	18.9238	-2.47267	-3.13568	0.0146557	0.356348	0.448126
1h post exercise	HIIE	DYRK1A	0.18597	15.0501	2.47004	-3.14142	0.014757	0.356348	0.448126
1h post exercise	HIIE	ZNF146	0.661129	12.6247	2.46783	-3.14638	0.0148464	0.356348	0.448126
1h post exercise	MICE	SRSF5	-0.45727	15.0325	-2.46771	-3.14664	0.0148512	0.356348	0.448126
1h post exercise	HIIE	ALDH3A2	0.237055	16.8662	2.4675	-3.14706	0.014858	0.356348	0.448126
1h post exercise	HIIE	LAMP1	0.289893	19.9266	2.46701	-3.14818	0.0148788	0.356348	0.448126
1h post exercise	HIIE	PSMA2	0.265551	18.5376	2.46566	-3.15117	0.0149326	0.356348	0.448126
1h post exercise	MICE	GARS1	-0.216763	18.3309	-2.4639	-3.155	0.0150012	0.356348	0.448126
1h post exercise	HIIE	BCCIP	0.591562	13.6837	2.46381	-3.15525	0.0150064	0.356348	0.448126
1h post exercise	HIIE	SPCS3	0.281454	18.672	2.46002	-3.16361	0.0151587	0.356348	0.448126
1h post exercise	HIIE	LZIC	0.371391	16.1773	2.45889	-3.1661	0.0152046	0.356348	0.448126
1h post exercise	MICE	POTEJ	-0.885036	17.9122	-2.45877	-3.16636	0.0152092	0.356348	0.448126
1h post exercise	HIIE	P2RY1	0.32396	14.3781	2.45624	-3.17191	0.0153116	0.356348	0.448126
1h post exercise	HIIE	ERMP1	0.217736	16.3853	2.45618	-3.17201	0.0153129	0.356348	0.448126
1h post exercise	HIIE	IGBP1	0.336147	14.1405	2.45391	-3.17704	0.0154069	0.356348	0.448126
1h post exercise	MICE	DUT	-0.190498	16.5529	-2.45274	-3.17957	0.0154535	0.356348	0.448126
1h post exercise	HIIE	BTD	0.243296	13.9855	2.45252	-3.18005	0.0154626	0.356348	0.448126
1h post exercise	HIIE	SRPRA	0.180182	15.8248	2.45243	-3.18025	0.0154662	0.356348	0.448126
1h post exercise	HIIE	MARF1	0.513657	17.7575	2.45137	-3.18263	0.0155115	0.356348	0.448126
1h post exercise	HIIE	SHKBP1	0.465178	14.2735	2.44887	-3.18813	0.015615	0.356348	0.448126
1h post exercise	HIIE	ATP5MK	0.194731	18.5904	2.44842	-3.18905	0.0156318	0.356348	0.448126
1h post exercise	HIIE	ACADVL	0.244422	20.0485	2.44832	-3.18931	0.0156371	0.356348	0.448126
1h post exercise	MICE	ZNF414	-0.383971	10.2292	-2.44246	-3.20211	0.0158808	0.360124	0.443548
1h post exercise	HIIE	SDAD1	0.459107	15.1144	2.44153	-3.20421	0.015922	0.360124	0.443548
Post exercise	HIIE	POM121C	0.552897	12.6986	3.39656	-0.891229	0.000897015	0.361138	0.442326
1h post exercise	HIIE	IDI1	0.218272	15.3057	2.43875	-3.21023	0.0160377	0.361387	0.442027
Post exercise	MICE	IMPACT	-0.61839	12.7744	-3.36935	-0.961124	0.000982896	0.36365	0.439316
Post exercise	MICE	GNB1L	-0.672125	12.8752	-3.35717	-0.992196	0.00102369	0.36365	0.439316
1h post exercise	MICE	RUNX3	-0.613718	13.9768	-2.4317	-3.22569	0.0163415	0.36557	0.43703
1h post exercise	MICE	GFOD1	-0.373175	14.925	-2.43163	-3.22583	0.0163444	0.36557	0.43703
1h post exercise	HIIE	CLTCL1	0.636425	12.4257	2.42895	-3.23168	0.0164606	0.366074	0.436431
1h post exercise	MICE	RMND5A	-0.595472	14.5363	-2.42669	-3.2366	0.0165591	0.366074	0.436431
1h post exercise	HIIE	UBE2Z	0.291072	16.3235	2.42537	-3.23947	0.0166167	0.366074	0.436431
1h post exercise	HIIE	SERAC1	0.849759	11.8185	2.42383	-3.24281	0.0166842	0.366074	0.436431
1h post exercise	HIIE	ATP11A	0.230932	15.5584	2.42291	-3.24475	0.0167228	0.366074	0.436431
1h post exercise	MICE	UBA6	-0.244034	17.1041	-2.42275	-3.24512	0.0167307	0.366074	0.436431
1h post exercise	HIIE	TMUB2	0.453685	12.5499	2.4117	-3.26912	0.0172253	0.375536	0.425349
1h post exercise	HIIE	CSGALNACT2	0.423075	13.565	2.40901	-3.27494	0.0173472	0.376834	0.42385
1h post exercise	HIIE	IPO8	0.538117	15.3008	2.40613	-3.28117	0.0174789	0.378221	0.422255
1h post exercise	HIIE	ABHD6	0.471576	11.6926	2.40488	-3.28387	0.0175363	0.378221	0.422255
1h post exercise	HIIE	PEPD	0.231165	18.3587	2.40163	-3.29084	0.017685	0.379097	0.42125
1h post exercise	HIIE	HYAL3	0.46939	13.5833	2.40128	-3.29163	0.0177025	0.379097	0.42125
1h post exercise	HIIE	KIFAP3	0.327338	12.2081	2.39959	-3.29522	0.017779	0.379391	0.420913
1h post exercise	MICE	UBE2I	-0.381265	18.148	-2.39708	-3.30067	0.0178979	0.380583	0.419551
1h post exercise	HIIE	FAM174A	0.50091	15.1938	2.39326	-3.30889	0.0180776	0.383055	0.416738
1h post exercise	HIIE	PAFAH1B3	0.244918	16.6839	2.39129	-3.31309	0.0181698	0.383662	0.416052
1h post exercise	HIIE	DDX31	0.657224	12.1919	2.38916	-3.31769	0.0182721	0.383798	0.415897
1h post exercise	HIIE	NCAM1	0.624766	12.8496	2.3885	-3.3191	0.0183033	0.383798	0.415897
1h post exercise	MICE	FOXO1	-0.54835	12.4411	-2.38529	-3.326	0.0184575	0.385577	0.413889
1h post exercise	HIIE	TARBP2	0.340802	13.8967	2.37969	-3.33796	0.0187281	0.385577	0.413889
1h post exercise	MICE	POLR3F	-0.617039	15.5659	-2.37833	-3.34087	0.0187945	0.385577	0.413889
1h post exercise	HIIE	UAP1	0.590593	14.3527	2.37682	-3.3441	0.0188685	0.385577	0.413889
1h post exercise	HIIE	ATG4C	0.263315	13.8864	2.37146	-3.35548	0.0191309	0.385577	0.413889
1h post exercise	MICE	HNRNPM	-0.319242	18.2314	-2.37119	-3.35611	0.0191465	0.385577	0.413889
1h post exercise	HIIE	ARL6IP4	0.681988	11.4959	2.37084	-3.35686	0.019164	0.385577	0.413889
1h post exercise	MICE	PPTC7	-0.400144	14.0344	-2.36557	-3.36807	0.0194274	0.385577	0.413889
1h post exercise	MICE	ALDH1B1	-0.396258	15.0812	-2.36397	-3.37147	0.019508	0.385577	0.413889
1h post exercise	HIIE	SRP9	0.461844	17.2438	2.36366	-3.37213	0.0195238	0.385577	0.413889
1h post exercise	HIIE	NME3	0.284256	15.5636	2.36361	-3.37225	0.0195264	0.385577	0.413889
1h post exercise	HIIE	GSTM4	0.6734	13.331	2.36201	-3.37564	0.0196074	0.385577	0.413889
1h post exercise	HIIE	DCTN6	0.262674	16.2996	2.36125	-3.37726	0.019646	0.385577	0.413889
1h post exercise	HIIE	TSN	0.216502	18.3412	2.36078	-3.37821	0.019668	0.385577	0.413889
1h post exercise	HIIE	LANCL1	0.208465	18.3743	2.36034	-3.37913	0.0196901	0.385577	0.413889
1h post exercise	HIIE	YTHDC2	0.240983	14.5439	2.36026	-3.37929	0.019694	0.385577	0.413889
1h post exercise	HIIE	DLG4	0.457458	12.9903	2.3585	-3.38309	0.0197862	0.385577	0.413889
1h post exercise	HIIE	HCCS	0.300939	14.2083	2.35697	-3.38631	0.0198635	0.385577	0.413889
1h post exercise	HIIE	PSMA3	0.205305	18.9988	2.35688	-3.38646	0.0198667	0.385577	0.413889
1h post exercise	HIIE	CD47	0.261277	21.4421	2.35594	-3.38851	0.0199174	0.385577	0.413889
1h post exercise	MICE	STAT1	-0.312002	16.4807	-2.35589	-3.38861	0.0199198	0.385577	0.413889
1h post exercise	HIIE	KIAA2013	0.267739	14.9689	2.35561	-3.38918	0.0199332	0.385577	0.413889
1h post exercise	HIIE	DICER1	0.154836	14.3413	2.35214	-3.39651	0.0201118	0.385577	0.413889
1h post exercise	HIIE	HTRA2	0.245142	17.1141	2.35181	-3.39723	0.0201299	0.385577	0.413889
1h post exercise	MICE	CDC16	-0.253236	14.3496	-2.3513	-3.39828	0.0201553	0.385577	0.413889
1h post exercise	HIIE	IGFBP7	0.388677	13.8133	2.35059	-3.39984	0.0201944	0.385577	0.413889
1h post exercise	MICE	VARS1	-0.218694	17.382	-2.35017	-3.40066	0.0202138	0.385577	0.413889
1h post exercise	HIIE	DCUN1D3	0.46007	12.3944	2.34995	-3.40118	0.0202275	0.385577	0.413889
1h post exercise	HIIE	HAAO	0.441929	13.7588	2.34875	-3.40373	0.0202904	0.385577	0.413889
1h post exercise	MICE	LOX	-0.754268	15.4265	-2.34762	-3.4061	0.0203492	0.385577	0.413889
1h post exercise	HIIE	XXYLT1	0.313348	12.693	2.34724	-3.40687	0.0203674	0.385577	0.413889
1h post exercise	MICE	ARL6	-0.393962	12.6709	-2.34583	-3.40987	0.0204428	0.38564	0.413817
1h post exercise	MICE	PDK3	-0.335587	15.9146	-2.34478	-3.41209	0.0204985	0.38564	0.413817
1h post exercise	HIIE	NCSTN	0.333677	17.1987	2.33998	-3.42221	0.0207534	0.388771	0.410306
1h post exercise	MICE	GFM2	-0.285968	13.8002	-2.33814	-3.42603	0.0208493	0.388771	0.410306
1h post exercise	HIIE	FKBP15	0.246054	15.1908	2.33799	-3.42636	0.0208581	0.388771	0.410306
1h post exercise	HIIE	CYP27A1	0.516554	13.9507	2.3364	-3.42975	0.0209453	0.389196	0.409831
1h post exercise	MICE	HLA-E	-0.736631	15.2228	-2.32985	-3.44349	0.0212999	0.391085	0.407729
1h post exercise	HIIE	S100A8	0.558531	18.7498	2.3297	-3.44381	0.0213082	0.391085	0.407729
1h post exercise	HIIE	B2M	0.292407	19.9534	2.32854	-3.44625	0.0213717	0.391085	0.407729
1h post exercise	MICE	WDR87	-1.78175	14.4757	-2.32839	-3.44655	0.0213797	0.391085	0.407729
1h post exercise	MICE	SSR4	-0.372162	18.7661	-2.32642	-3.45069	0.0214881	0.391085	0.407729
1h post exercise	HIIE	SMCR8	0.268699	16.0753	2.32626	-3.45102	0.0214968	0.391085	0.407729
1h post exercise	HIIE	UBAC1	0.40581	12.1724	2.32604	-3.45145	0.0215076	0.391085	0.407729
1h post exercise	HIIE	GNS	0.312696	17.069	2.32477	-3.45413	0.0215785	0.391085	0.407729
1h post exercise	HIIE	ITGA5	0.299705	15.5037	2.32385	-3.45607	0.0216298	0.391085	0.407729
1h post exercise	MICE	MRPL32	-0.34396	13.3817	-2.3195	-3.46512	0.0218701	0.392825	0.405801
1h post exercise	HIIE	ROMO1	0.804299	14.3032	2.31853	-3.46717	0.0219254	0.392825	0.405801
1h post exercise	MICE	GTF2E2	-0.449863	12.4149	-2.31846	-3.46733	0.0219296	0.392825	0.405801
1h post exercise	MICE	EDC3	-0.292999	14.0168	-2.31695	-3.47043	0.0220124	0.392825	0.405801
1h post exercise	HIIE	SFXN5	0.27942	13.6097	2.31625	-3.47188	0.0220513	0.392825	0.405801
1h post exercise	HIIE	SEC11A	0.204374	19.1537	2.30399	-3.49739	0.0227505	0.401803	0.395987
1h post exercise	HIIE	TXN2	0.389601	13.1052	2.30336	-3.49875	0.0227894	0.401803	0.395987
1h post exercise	HIIE	MRPL28	0.237092	14.4841	2.30311	-3.49922	0.0228018	0.401803	0.395987
1h post exercise	HIIE	CD44	0.513276	16.5962	2.30252	-3.50049	0.0228382	0.401803	0.395987
1h post exercise	MICE	CX3CR1	-0.339959	12.9204	-2.30163	-3.5023	0.0228879	0.401803	0.395987
Post exercise	HIIE	BIRC2	0.388067	12.9198	3.2894	-1.16324	0.00128079	0.407457	0.389918
Post exercise	MICE	ATP6V1B1	-0.977465	11.9241	-3.28922	-1.1639	0.00128195	0.407457	0.389918
1h post exercise	HIIE	IL6ST	0.354494	14.2995	2.29411	-3.5179	0.0233306	0.408387	0.388928
1h post exercise	MICE	NAP1L1	-0.410748	19.2905	-2.29121	-3.5239	0.0235028	0.409251	0.38801
1h post exercise	HIIE	PSMA1	0.18405	20.4483	2.29096	-3.52437	0.0235155	0.409251	0.38801
1h post exercise	HIIE	MDH2	0.240121	21.855	2.28957	-3.52725	0.0235993	0.409529	0.387715
1h post exercise	HIIE	AIFM1	0.139665	19.0865	2.28595	-3.53469	0.0238149	0.411158	0.385991
1h post exercise	HIIE	TMC8	0.334233	14.0778	2.28475	-3.53722	0.0238899	0.411158	0.385991
1h post exercise	HIIE	TK2	0.211933	16.5272	2.28431	-3.53807	0.0239141	0.411158	0.385991
1h post exercise	HIIE	TAOK2	0.452842	13.8945	2.2835	-3.53979	0.0239655	0.411158	0.385991
1h post exercise	MICE	UNG	-0.40265	14.6407	-2.28067	-3.54562	0.0241375	0.411347	0.385791
1h post exercise	HIIE	SLC3A2	0.279328	15.9301	2.28018	-3.54661	0.024167	0.411347	0.385791
1h post exercise	HIIE	UBQLN1	0.274802	14.643	2.27993	-3.5471	0.0241809	0.411347	0.385791
Post exercise	HIIE	TLR1	0.703161	14.0454	3.27053	-1.21062	0.00136299	0.411555	0.385573
1h post exercise	HIIE	PIEZO1	0.263335	12.4876	2.27564	-3.5559	0.0244433	0.414643	0.382326
1h post exercise	HIIE	SZT2	0.42273	12.7725	2.27298	-3.56138	0.0246093	0.41629	0.380604
1h post exercise	HIIE	FOXO3	0.452044	12.9258	2.27104	-3.56537	0.02473	0.416487	0.380399
1h post exercise	HIIE	NOMO2	0.213822	17.2021	2.27054	-3.56635	0.0247588	0.416487	0.380399
1h post exercise	MICE	RPAP1	-0.369822	12.7165	-2.26843	-3.5707	0.0248921	0.416955	0.379911
1h post exercise	HIIE	MPO	0.559315	21.8933	2.26731	-3.57299	0.0249628	0.416955	0.379911
1h post exercise	HIIE	RCOR1	0.432984	13.5633	2.26682	-3.574	0.0249938	0.416955	0.379911
1h post exercise	HIIE	PLBD2	0.333548	16.0177	2.26385	-3.58008	0.0251812	0.417778	0.379055
1h post exercise	HIIE	TBC1D17	0.178091	15.7903	2.26239	-3.58302	0.0252712	0.417778	0.379055
1h post exercise	MICE	ACADSB	-0.266386	18.2314	-2.25954	-3.58886	0.0254546	0.417778	0.379055
1h post exercise	HIIE	FNDC3A	0.414089	12.9938	2.25848	-3.59103	0.0255225	0.417778	0.379055
1h post exercise	HIIE	POLG2	0.373681	12.6596	2.2582	-3.59159	0.0255397	0.417778	0.379055
1h post exercise	HIIE	S100A9	0.614232	19.2365	2.25718	-3.59367	0.0256056	0.417778	0.379055
1h post exercise	MICE	MAP3K2	-0.700598	15.4551	-2.25658	-3.5949	0.0256443	0.417778	0.379055
1h post exercise	HIIE	SLC15A4	0.425345	13.9296	2.25648	-3.5951	0.0256507	0.417778	0.379055
1h post exercise	HIIE	UNC119	0.237451	15.4383	2.25622	-3.59561	0.0256658	0.417778	0.379055
1h post exercise	HIIE	GMPR2	0.187967	18.449	2.25339	-3.60134	0.0258473	0.419364	0.377409
1h post exercise	HIIE	AGPAT3	0.210672	16.0082	2.25091	-3.60638	0.0260081	0.419364	0.377409
1h post exercise	HIIE	MVD	0.17967	16.3397	2.25058	-3.60706	0.02603	0.419364	0.377409
1h post exercise	MICE	GFM1	-0.230537	15.7282	-2.25042	-3.6074	0.026041	0.419364	0.377409
1h post exercise	HIIE	DHRS7	0.203292	18.7173	2.24732	-3.61368	0.0262428	0.420692	0.376036
1h post exercise	HIIE	KATNB1	0.333113	13.7436	2.24674	-3.61488	0.0262826	0.420692	0.376036
1h post exercise	HIIE	PGGT1B	0.353742	15.4953	2.24599	-3.61642	0.0263324	0.420692	0.376036
1h post exercise	MICE	WASF3	-0.628586	15.2847	-2.24229	-3.6239	0.0265764	0.422541	0.374132
1h post exercise	MICE	NLRC3	-0.330488	11.8274	-2.24208	-3.62429	0.0265881	0.422541	0.374132
1h post exercise	HIIE	ZNF143	0.518983	14.341	2.23785	-3.63289	0.0268723	0.424546	0.372076
1h post exercise	HIIE	TUBGCP6	0.463034	11.9212	2.23728	-3.63403	0.0269101	0.424546	0.372076
1h post exercise	HIIE	FPGT	0.171313	14.6212	2.23702	-3.63452	0.0269252	0.424546	0.372076
1h post exercise	HIIE	ITSN2	0.163572	15.2846	2.23531	-3.63797	0.02704	0.425185	0.371422
1h post exercise	HIIE	GET4	0.284543	15.3509	2.23436	-3.63993	0.0271065	0.425185	0.371422
1h post exercise	HIIE	MTAP	0.216223	16.9465	2.22985	-3.64899	0.0274102	0.428835	0.36771
1h post exercise	MICE	TST	-0.503384	18.6222	-2.22855	-3.65164	0.0275007	0.429139	0.367402
1h post exercise	HIIE	PLSCR1	0.345151	15.017	2.2256	-3.65758	0.0277028	0.430094	0.366437
1h post exercise	HIIE	IGSF8	0.217022	14.6916	2.22554	-3.65765	0.0277043	0.430094	0.366437
1h post exercise	HIIE	LIG4	0.39497	12.3767	2.22227	-3.66427	0.0279325	0.431269	0.365251
1h post exercise	HIIE	ARF6	0.265975	19.3406	2.22191	-3.66498	0.027957	0.431269	0.365251
1h post exercise	HIIE	TSPAN14	0.262196	18.2585	2.22052	-3.66776	0.0280534	0.431269	0.365251
1h post exercise	HIIE	TBL2	0.160891	14.8393	2.21957	-3.66963	0.0281171	0.431269	0.365251
1h post exercise	HIIE	ELOC	0.152753	16.9342	2.21928	-3.67021	0.0281371	0.431269	0.365251
1h post exercise	HIIE	SAP30L	0.494168	14.2492	2.21532	-3.6782	0.0284171	0.433551	0.36296
1h post exercise	HIIE	B3GAT3	0.197318	15.5568	2.21446	-3.67988	0.0284752	0.433551	0.36296
1h post exercise	HIIE	EIF3K	0.276544	16.9606	2.21209	-3.68466	0.0286449	0.433551	0.36296
1h post exercise	HIIE	LTN1	0.243196	13.0943	2.21192	-3.68495	0.0286541	0.433551	0.36296
1h post exercise	HIIE	SCRN1	0.209139	14.5004	2.21092	-3.68696	0.0287253	0.433551	0.36296
1h post exercise	HIIE	SLC44A2	0.312927	17.697	2.21022	-3.68839	0.028777	0.433551	0.36296
1h post exercise	MICE	NCBP2	-0.596305	14.4053	-2.20959	-3.68965	0.028822	0.433551	0.36296
1h post exercise	HIIE	ATRN	0.465586	13.0474	2.20905	-3.69073	0.0288603	0.433551	0.36296
1h post exercise	HIIE	CTSG	0.723856	19.5818	2.20607	-3.69667	0.0290731	0.434022	0.362488
1h post exercise	HIIE	RIPK2	0.325174	13.1753	2.20574	-3.6973	0.0290952	0.434022	0.362488
1h post exercise	HIIE	TMX2	0.270075	15.3015	2.20559	-3.69762	0.0291073	0.434022	0.362488
1h post exercise	HIIE	ARL3	0.224753	16.9144	2.20132	-3.70611	0.029414	0.437515	0.359007
1h post exercise	HIIE	SPTLC1	0.127251	16.1197	2.19992	-3.70887	0.029514	0.437924	0.358602
1h post exercise	HIIE	GOLGA3	0.192257	16.1745	2.19853	-3.71165	0.0296157	0.438355	0.358174
1h post exercise	MICE	HPF1	-0.482181	11.9097	-2.19553	-3.71764	0.0298371	0.438365	0.358164
1h post exercise	MICE	APOL3	-0.518102	13.8543	-2.19438	-3.71991	0.0299211	0.438365	0.358164
1h post exercise	HIIE	GM2A	0.501521	14.9377	2.19111	-3.72641	0.0301628	0.438365	0.358164
1h post exercise	HIIE	MGAT2	0.214418	16.7257	2.18859	-3.73137	0.0303477	0.438365	0.358164
1h post exercise	MICE	RIOX1	-0.44072	13.5933	-2.18744	-3.73367	0.030435	0.438365	0.358164
1h post exercise	MICE	CNEP1R1	-0.667924	14.457	-2.18734	-3.73387	0.0304428	0.438365	0.358164
1h post exercise	HIIE	DPP8	0.252783	13.6433	2.18653	-3.73543	0.0305005	0.438365	0.358164
1h post exercise	HIIE	GSR	0.178911	20.7605	2.18639	-3.7357	0.0305107	0.438365	0.358164
1h post exercise	MICE	MCF2L	-0.444576	11.6548	-2.18613	-3.73627	0.0305332	0.438365	0.358164
1h post exercise	HIIE	GSS	0.172131	18.9912	2.18516	-3.73815	0.0306032	0.438365	0.358164
1h post exercise	HIIE	AAGAB	0.32721	13.7565	2.18509	-3.73832	0.0306108	0.438365	0.358164
1h post exercise	HIIE	DHODH	0.318983	15.715	2.18314	-3.74217	0.0307574	0.438365	0.358164
1h post exercise	MICE	AKT3	-0.353474	13.347	-2.18201	-3.74439	0.0308422	0.438365	0.358164
1h post exercise	MICE	SUCLG2	-0.267108	17.7107	-2.1813	-3.74581	0.0308962	0.438365	0.358164
1h post exercise	HIIE	CHMP4C	0.503252	12.3737	2.17933	-3.74969	0.0310452	0.438365	0.358164
1h post exercise	MICE	LCK	-0.36592	16.599	-2.1789	-3.75053	0.0310775	0.438365	0.358164
1h post exercise	MICE	PURB	-0.159364	15.0402	-2.17885	-3.7506	0.031079	0.438365	0.358164
1h post exercise	HIIE	WDR41	0.288535	14.0723	2.17861	-3.7511	0.0310988	0.438365	0.358164
1h post exercise	MICE	MAP1LC3B	-0.460025	16.3822	-2.17756	-3.75317	0.0311797	0.438365	0.358164
1h post exercise	HIIE	MGST1	0.51975	16.1247	2.17711	-3.75407	0.0312142	0.438365	0.358164
1h post exercise	HIIE	MYOF	0.465658	14.4587	2.17687	-3.75453	0.0312322	0.438365	0.358164
1h post exercise	MICE	DECR1	-0.199721	20.8207	-2.17195	-3.76417	0.0316067	0.438365	0.358164
1h post exercise	HIIE	SEC24D	0.161764	14.7331	2.17066	-3.76671	0.0317064	0.438365	0.358164
1h post exercise	MICE	FCER1G	-0.34372	17.8862	-2.16776	-3.77244	0.0319339	0.438365	0.358164
1h post exercise	HIIE	FXR1	0.152651	15.5433	2.16768	-3.77255	0.031937	0.438365	0.358164
1h post exercise	HIIE	ALDH3B1	0.420455	15.388	2.16759	-3.77276	0.0319466	0.438365	0.358164
1h post exercise	HIIE	MICAL3	0.279079	14.1934	2.16699	-3.77393	0.0319923	0.438365	0.358164
1h post exercise	HIIE	TPCN1	0.273035	13.752	2.16678	-3.77433	0.0320077	0.438365	0.358164
1h post exercise	HIIE	NUDT5	0.191073	16.6427	2.16659	-3.77469	0.032022	0.438365	0.358164
1h post exercise	HIIE	DSE	0.726497	11.7687	2.16588	-3.77612	0.0320799	0.438365	0.358164
1h post exercise	HIIE	GPR183	0.3389	14.0439	2.16559	-3.7767	0.0321029	0.438365	0.358164
1h post exercise	MICE	TOR1AIP1	-0.307206	16.5693	-2.16488	-3.77809	0.0321586	0.438365	0.358164
1h post exercise	MICE	BZW1	-0.207732	16.0669	-2.16483	-3.77815	0.0321595	0.438365	0.358164
1h post exercise	MICE	CDK17	-0.354714	14.0906	-2.16425	-3.77932	0.0322075	0.438365	0.358164
1h post exercise	HIIE	ACSL1	0.164753	17.6996	2.16361	-3.78054	0.0322553	0.438365	0.358164
1h post exercise	HIIE	ZFYVE26	0.256008	14.5449	2.16327	-3.78121	0.0322823	0.438365	0.358164
1h post exercise	HIIE	VPS26A	0.321331	16.6944	2.16304	-3.78168	0.0323021	0.438365	0.358164
1h post exercise	HIIE	VPS39	0.119102	15.7962	2.16097	-3.78571	0.0324628	0.439558	0.356984
1h post exercise	HIIE	PLSCR3	0.384378	14.855	2.15942	-3.78877	0.0325877	0.439599	0.356943
1h post exercise	HIIE	CLPB	0.191024	15.9161	2.15909	-3.78938	0.0326114	0.439599	0.356943
1h post exercise	MICE	EIF4A1	-0.224258	20.8534	-2.15549	-3.79644	0.0328997	0.442498	0.354089
1h post exercise	MICE	SELENOH	-0.5101	16.9612	-2.15317	-3.80096	0.0330853	0.442597	0.353991
1h post exercise	HIIE	CPOX	0.246406	17.6863	2.15274	-3.80181	0.0331203	0.442597	0.353991
1h post exercise	HIIE	PSMA6	0.212736	19.3853	2.15007	-3.807	0.0333339	0.442597	0.353991
1h post exercise	HIIE	PAFAH1B2	0.257214	18.6626	2.14964	-3.80784	0.0333694	0.442597	0.353991
1h post exercise	MICE	IDH2	-0.249819	22.203	-2.14833	-3.8104	0.0334758	0.442597	0.353991
1h post exercise	HIIE	OAS1	0.513327	13.1868	2.14817	-3.81072	0.0334888	0.442597	0.353991
1h post exercise	HIIE	ATG2A	0.19438	12.9077	2.14669	-3.81355	0.0336059	0.442597	0.353991
1h post exercise	MICE	DMXL2	-0.438018	13.1786	-2.14665	-3.81366	0.0336116	0.442597	0.353991
1h post exercise	HIIE	NPEPL1	0.299487	15.2269	2.14629	-3.81437	0.0336412	0.442597	0.353991
1h post exercise	HIIE	CEBPB	0.509441	15.1529	2.14564	-3.81562	0.0336937	0.442597	0.353991
1h post exercise	HIIE	ERP44	0.223633	19.9623	2.14525	-3.81639	0.0337261	0.442597	0.353991
1h post exercise	HIIE	NDUFS3	0.221315	17.7735	2.14449	-3.81784	0.0337866	0.442597	0.353991
1h post exercise	HIIE	PRSS57	0.6129	13.3618	2.14305	-3.82066	0.0339058	0.443197	0.353403
1h post exercise	HIIE	COMMD3-BMI1	0.3853	12.4409	2.13963	-3.82729	0.0341867	0.445653	0.351003
1h post exercise	MICE	ARMT1	-0.252971	15.2867	-2.13897	-3.82858	0.0342413	0.445653	0.351003
1h post exercise	HIIE	TMEM258	0.62816	17.0504	2.13738	-3.83164	0.0343722	0.445892	0.350771
1h post exercise	MICE	GSDMD	-0.224745	16.7742	-2.13555	-3.83517	0.034523	0.445892	0.350771
1h post exercise	HIIE	GGCT	0.20277	17.2447	2.13403	-3.83809	0.0346484	0.445892	0.350771
1h post exercise	HIIE	IDE	0.140639	19.7186	2.13361	-3.83892	0.0346838	0.445892	0.350771
1h post exercise	MICE	RNF169	-0.436585	12.3481	-2.13344	-3.83928	0.0347007	0.445892	0.350771
1h post exercise	HIIE	RHOT1	0.178958	16.2905	2.13259	-3.84088	0.0347687	0.445892	0.350771
1h post exercise	HIIE	GPSM3	0.320151	14.5354	2.13253	-3.84103	0.0347764	0.445892	0.350771
1h post exercise	HIIE	XPNPEP3	0.322021	13.6708	2.12398	-3.85751	0.0354982	0.454182	0.34277
1h post exercise	MICE	PTRH1	-0.280004	12.8012	-2.12301	-3.85936	0.0355787	0.454249	0.342706
1h post exercise	HIIE	ACOX3	0.213603	14.3786	2.12094	-3.86334	0.0357556	0.454955	0.342031
1h post exercise	MICE	NFYC	-0.408175	14.2015	-2.12003	-3.86511	0.035836	0.454955	0.342031
1h post exercise	MICE	SNW1	-0.293713	15.7614	-2.11903	-3.86704	0.0359224	0.454955	0.342031
1h post exercise	HIIE	ITIH1	0.387499	17.0322	2.11854	-3.86797	0.0359642	0.454955	0.342031
1h post exercise	HIIE	PHYKPL	0.21814	14.8753	2.11797	-3.86903	0.0360107	0.454955	0.342031
1h post exercise	HIIE	VPS29	0.139781	18.1281	2.11636	-3.87213	0.0361501	0.455763	0.341261
1h post exercise	HIIE	RABGAP1L	0.134809	15.3242	2.11397	-3.87672	0.0363576	0.456265	0.340783
1h post exercise	MICE	USP22	-0.365935	12.2509	-2.11394	-3.87678	0.0363613	0.456265	0.340783
1h post exercise	HIIE	CEMIP2	0.305287	14.7531	2.11227	-3.88	0.0365084	0.456265	0.340783
1h post exercise	HIIE	NFAT5	0.223499	14.0855	2.11067	-3.88304	0.0366459	0.456265	0.340783
1h post exercise	HIIE	ENG	0.282804	17.0977	2.11061	-3.88318	0.0366535	0.456265	0.340783
1h post exercise	HIIE	UTP4	0.757644	12.3611	2.10924	-3.8858	0.0367736	0.456265	0.340783
1h post exercise	HIIE	CISD2	0.254833	17.59	2.10711	-3.88987	0.0369611	0.456265	0.340783
1h post exercise	HIIE	DDB1	0.187983	18.7714	2.10706	-3.88993	0.0369623	0.456265	0.340783
1h post exercise	HIIE	IGKV1-16	1.58333	12.4356	2.10673	-3.89059	0.0369942	0.456265	0.340783
1h post exercise	HIIE	AGA	0.466225	15.808	2.10549	-3.89296	0.0371038	0.456265	0.340783
1h post exercise	HIIE	S100A6	0.340078	17.7734	2.1054	-3.89314	0.0371123	0.456265	0.340783
1h post exercise	MICE	FUS	-0.309856	16.9342	-2.10472	-3.89443	0.0371722	0.456265	0.340783
1h post exercise	MICE	AFG3L2	-0.228167	17.1233	-2.10435	-3.89514	0.0372051	0.456265	0.340783
1h post exercise	HIIE	FLCN	0.270917	13.5535	2.10384	-3.89608	0.0372477	0.456265	0.340783
1h post exercise	HIIE	UNK	0.45821	13.2707	2.09907	-3.9052	0.0376761	0.456545	0.340516
1h post exercise	HIIE	PLD4	0.530898	14.7551	2.09838	-3.90652	0.037738	0.456545	0.340516
1h post exercise	MICE	LPCAT4	-0.366156	13.359	-2.0958	-3.91142	0.0379703	0.456545	0.340516
1h post exercise	HIIE	SLC44A1	0.333853	15.8394	2.0952	-3.91256	0.0380244	0.456545	0.340516
1h post exercise	HIIE	MRPL24	0.438084	15.7989	2.09488	-3.91317	0.0380531	0.456545	0.340516
1h post exercise	HIIE	SEMA4A	0.456341	13.3027	2.09379	-3.91525	0.0381522	0.456545	0.340516
1h post exercise	MICE	GIMAP1	-0.341766	17.2894	-2.09356	-3.91568	0.0381727	0.456545	0.340516
1h post exercise	HIIE	PPP1R12B	0.568443	11.5544	2.0926	-3.9175	0.03826	0.456545	0.340516
1h post exercise	HIIE	RNASE3	0.662771	17.4245	2.09255	-3.91759	0.0382643	0.456545	0.340516
1h post exercise	HIIE	INPPL1	0.139234	14.857	2.09246	-3.91774	0.0382702	0.456545	0.340516
1h post exercise	HIIE	PTGES3	0.497152	17.2132	2.09082	-3.92089	0.0384224	0.456545	0.340516
1h post exercise	HIIE	ALDOA	0.161379	23.2851	2.08852	-3.92522	0.0386299	0.456545	0.340516
1h post exercise	HIIE	SLC6A6	0.202742	16.0465	2.08746	-3.92722	0.0387267	0.456545	0.340516
1h post exercise	MICE	SUN2	-0.316513	17.5391	-2.08684	-3.92843	0.0387868	0.456545	0.340516
1h post exercise	HIIE	ZBTB14	0.645252	10.4773	2.08635	-3.92934	0.0388314	0.456545	0.340516
1h post exercise	HIIE	MAN2B1	0.276897	16.5726	2.08627	-3.9295	0.0388388	0.456545	0.340516
1h post exercise	HIIE	C16orf54	0.451998	12.4433	2.08597	-3.93008	0.038867	0.456545	0.340516
1h post exercise	HIIE	ESYT1	0.111437	20.7128	2.08577	-3.93041	0.038882	0.456545	0.340516
1h post exercise	HIIE	UPF1	0.160744	17.2422	2.08541	-3.93111	0.038916	0.456545	0.340516
1h post exercise	MICE	MBD2	-0.30245	15.3644	-2.0847	-3.93248	0.038984	0.456545	0.340516
1h post exercise	HIIE	REXO2	0.317753	16.9054	2.08267	-3.9363	0.0391713	0.456545	0.340516
1h post exercise	HIIE	ARPC3	0.224646	21.4934	2.08188	-3.93781	0.0392454	0.456545	0.340516
1h post exercise	MICE	AASDHPPT	-0.270738	15.8526	-2.08116	-3.93917	0.039312	0.456545	0.340516
1h post exercise	MICE	TXLNG	-0.527245	13.3472	-2.08067	-3.9401	0.0393578	0.456545	0.340516
1h post exercise	HIIE	OSCAR	0.535976	12.9128	2.07958	-3.94214	0.0394587	0.456545	0.340516
1h post exercise	HIIE	COX5B	0.453297	19.4104	2.07958	-3.94215	0.039459	0.456545	0.340516
1h post exercise	HIIE	HMBS	0.471121	12.5088	2.07928	-3.94272	0.0394872	0.456545	0.340516
1h post exercise	HIIE	OXSM	0.190651	15.5638	2.07884	-3.94351	0.0395251	0.456545	0.340516
1h post exercise	HIIE	DGKH	0.450858	12.8595	2.07884	-3.94354	0.0395282	0.456545	0.340516
1h post exercise	HIIE	DYSF	0.410106	15.1014	2.07855	-3.9441	0.0395556	0.456545	0.340516
1h post exercise	MICE	F2RL3	-0.786327	17.6089	-2.07749	-3.94609	0.0396545	0.456545	0.340516
1h post exercise	HIIE	STX8	0.397933	13.7048	2.07644	-3.94807	0.0397531	0.456545	0.340516
1h post exercise	MICE	MPST	-0.538384	17.6704	-2.07631	-3.94832	0.0397653	0.456545	0.340516
1h post exercise	HIIE	MRPL21	0.282544	15.77	2.0755	-3.94984	0.0398413	0.45655	0.340512
1h post exercise	HIIE	SCAMP1	0.201902	15.6419	2.07235	-3.95575	0.040136	0.458265	0.338883
1h post exercise	HIIE	ANKRD22	0.588923	12.3934	2.07181	-3.95679	0.0401898	0.458265	0.338883
1h post exercise	HIIE	PSMA4	0.208376	20.2495	2.07042	-3.9594	0.040321	0.458265	0.338883
1h post exercise	HIIE	BROX	0.133609	17.6271	2.06963	-3.96086	0.040394	0.458265	0.338883
1h post exercise	HIIE	SHOC2	0.125466	16.3846	2.06849	-3.963	0.040503	0.458265	0.338883
1h post exercise	HIIE	NDUFV2	0.339322	16.2768	2.06686	-3.96609	0.0406615	0.458265	0.338883
1h post exercise	HIIE	KIAA0930	0.217	14.6229	2.0641	-3.97124	0.0409239	0.458265	0.338883
1h post exercise	MICE	TBCEL	-0.318724	14.123	-2.0639	-3.97164	0.0409458	0.458265	0.338883
1h post exercise	HIIE	PPP1R11	0.326551	12.8905	2.06323	-3.97287	0.0410086	0.458265	0.338883
1h post exercise	MICE	RAP2C	-0.603086	13.8566	-2.06308	-3.97317	0.0410248	0.458265	0.338883
1h post exercise	HIIE	GNAI2	0.30764	21.119	2.06206	-3.97508	0.0411233	0.458265	0.338883
1h post exercise	MICE	PKM	-0.223099	24.4967	-2.06112	-3.97682	0.0412119	0.458265	0.338883
1h post exercise	HIIE	WDR74	0.564299	13.3729	2.05901	-3.9808	0.0414193	0.458265	0.338883
1h post exercise	HIIE	PASK	0.144796	16.1621	2.05842	-3.98186	0.0414733	0.458265	0.338883
1h post exercise	MICE	LCMT1	-0.371829	15.0573	-2.05634	-3.98578	0.0416796	0.458265	0.338883
1h post exercise	HIIE	CC2D1A	0.162548	14.7603	2.05457	-3.98906	0.0418501	0.458265	0.338883
1h post exercise	HIIE	SLC27A2	0.286236	14.0746	2.05433	-3.98953	0.0418763	0.458265	0.338883
1h post exercise	HIIE	BST1	0.517986	15.1345	2.0539	-3.99033	0.0419183	0.458265	0.338883
1h post exercise	HIIE	CPD	0.556309	11.3546	2.05389	-3.99036	0.0419202	0.458265	0.338883
1h post exercise	HIIE	SAMM50	0.273653	16.8641	2.05373	-3.99066	0.0419356	0.458265	0.338883
1h post exercise	HIIE	GNAI1	0.190354	19.9613	2.05365	-3.99078	0.0419408	0.458265	0.338883
1h post exercise	MICE	PPM1F	-0.237144	18.5073	-2.05009	-3.99743	0.0422943	0.458265	0.338883
1h post exercise	HIIE	SLC4A2	0.215344	12.4498	2.04961	-3.99831	0.0423397	0.458265	0.338883
1h post exercise	HIIE	RPS12	0.454932	18.354	2.04905	-3.99938	0.0423978	0.458265	0.338883
1h post exercise	MICE	GAPDH	-0.401391	23.9748	-2.04898	-3.9995	0.0424045	0.458265	0.338883
1h post exercise	HIIE	NUCB1	0.247541	16.637	2.04764	-4.002	0.0425376	0.458265	0.338883
1h post exercise	HIIE	PRTN3	0.625403	19.4698	2.04691	-4.00335	0.0426101	0.458265	0.338883
1h post exercise	MICE	TUBA1A	-0.423729	23.8715	-2.04686	-4.00344	0.0426152	0.458265	0.338883
1h post exercise	MICE	UBE2A	-0.378715	14.6906	-2.04583	-4.00537	0.0427187	0.458265	0.338883
1h post exercise	HIIE	PLXNB2	0.190711	16.9484	2.04576	-4.00546	0.0427221	0.458265	0.338883
1h post exercise	HIIE	SIGMAR1	0.295064	16.3213	2.04572	-4.00557	0.0427295	0.458265	0.338883
1h post exercise	HIIE	FANCD2	0.453575	13.2164	2.04561	-4.00577	0.0427399	0.458265	0.338883
1h post exercise	MICE	FADD	-0.310169	14.0138	-2.04428	-4.00824	0.0428732	0.458265	0.338883
1h post exercise	MICE	ACTR1A	-0.207672	19.6019	-2.04299	-4.01064	0.0430023	0.458265	0.338883
1h post exercise	MICE	PAK1	-0.373377	15.3277	-2.04203	-4.01243	0.0430995	0.458265	0.338883
1h post exercise	HIIE	USF2	0.388147	14.1978	2.04155	-4.01331	0.0431475	0.458265	0.338883
1h post exercise	HIIE	VCAN	0.448217	16.6818	2.04079	-4.01471	0.0432237	0.458265	0.338883
1h post exercise	HIIE	OSTC	0.347271	16.5748	2.03994	-4.0163	0.0433103	0.458265	0.338883
1h post exercise	HIIE	PLPP6	0.353673	13.2788	2.0399	-4.01638	0.0433144	0.458265	0.338883
1h post exercise	MICE	GSK3A	-0.188628	14.7867	-2.03884	-4.01832	0.043419	0.458265	0.338883
1h post exercise	HIIE	KIFBP	0.34509	13.6327	2.0388	-4.01841	0.0434254	0.458265	0.338883
1h post exercise	HIIE	FBXW5	0.409211	11.906	2.03831	-4.01931	0.0434745	0.458265	0.338883
1h post exercise	MICE	ORAI1	-0.636569	13.8493	-2.03633	-4.02298	0.0436759	0.458265	0.338883
1h post exercise	HIIE	TSPAN15	0.258522	15.8258	2.03621	-4.0232	0.0436883	0.458265	0.338883
1h post exercise	MICE	DCK	-0.322755	16.0079	-2.0358	-4.02396	0.0437298	0.458265	0.338883
1h post exercise	HIIE	RHBDD1	0.428775	13.6544	2.03491	-4.02561	0.0438207	0.458265	0.338883
1h post exercise	HIIE	P2RX4	0.480081	13.8114	2.03488	-4.02567	0.0438242	0.458265	0.338883
1h post exercise	HIIE	YWHAE	0.140524	21.9302	2.0343	-4.02672	0.0438804	0.458265	0.338883
1h post exercise	MICE	SCO1	-0.179719	16.9209	-2.03374	-4.02775	0.0439374	0.458265	0.338883
1h post exercise	MICE	PTPN7	-0.189699	15.4292	-2.03351	-4.02817	0.0439607	0.458265	0.338883
1h post exercise	MICE	SUPT3H	-0.493019	10.777	-2.03288	-4.02936	0.0440282	0.458265	0.338883
1h post exercise	HIIE	TXN	0.229486	17.9031	2.03212	-4.03076	0.0441061	0.458265	0.338883
1h post exercise	HIIE	B4GALT7	0.228808	13.8506	2.03169	-4.03154	0.044148	0.458265	0.338883
1h post exercise	HIIE	NR3C1	0.50559	12.5463	2.0316	-4.03173	0.0441602	0.458265	0.338883
1h post exercise	HIIE	PSAP	0.335598	17.1233	2.03155	-4.03181	0.0441646	0.458265	0.338883
1h post exercise	HIIE	WDR26	0.147924	16.1207	2.02941	-4.03574	0.0443824	0.459735	0.337492
1h post exercise	HIIE	PFDN5	0.2317	14.4983	2.02711	-4.03999	0.0446205	0.460899	0.336394
1h post exercise	MICE	NELFB	-0.351291	15.0982	-2.02688	-4.04044	0.0446474	0.460899	0.336394
1h post exercise	HIIE	NUDT16L1	0.198227	15.9694	2.02413	-4.04548	0.0449308	0.463032	0.334389
1h post exercise	HIIE	HSPBP1	0.220127	14.4165	2.02183	-4.04971	0.0451707	0.464712	0.332816
1h post exercise	MICE	DDHD2	-0.324552	14.437	-2.0181	-4.05658	0.0455656	0.466826	0.330845
1h post exercise	HIIE	NDUFB1	0.324038	16.1042	2.01774	-4.05725	0.0456043	0.466826	0.330845
1h post exercise	HIIE	ADCK5	0.331	11.103	2.01748	-4.0577	0.0456288	0.466826	0.330845
1h post exercise	HIIE	PGD	0.143371	21.3305	2.01694	-4.05869	0.0456855	0.466826	0.330845
1h post exercise	HIIE	RPL10	0.339232	17.9905	2.01488	-4.06248	0.0459065	0.467556	0.330166
1h post exercise	MICE	OXCT1	-0.215759	18.1006	-2.01483	-4.06257	0.0459117	0.467556	0.330166
1h post exercise	HIIE	VAT1	0.333945	18.4735	2.01379	-4.06449	0.0460229	0.467899	0.329848
1h post exercise	HIIE	HEATR6	0.45136	12.1411	2.01131	-4.06902	0.0462872	0.468922	0.3289
1h post exercise	HIIE	MON1B	0.153603	14.7751	2.01082	-4.0699	0.0463368	0.468922	0.3289
1h post exercise	HIIE	SLC22A18	0.223449	15.8095	2.00957	-4.0722	0.0464732	0.468922	0.3289
1h post exercise	MICE	HIBCH	-0.177718	17.7339	-2.00926	-4.07275	0.0465041	0.468922	0.3289
1h post exercise	HIIE	NUDC	0.150316	17.279	2.00872	-4.07374	0.0465625	0.468922	0.3289
1h post exercise	MICE	SRSF9	-0.385662	15.1447	-2.0078	-4.07544	0.0466639	0.468922	0.3289
1h post exercise	HIIE	LACTB2	0.221972	15.1485	2.00775	-4.07551	0.046667	0.468922	0.3289
1h post exercise	HIIE	TFG	0.183326	17.482	2.00688	-4.07709	0.0467602	0.469077	0.328756
1h post exercise	MICE	UBA1	-0.158381	19.9675	-2.00417	-4.08204	0.0470535	0.469608	0.328265
1h post exercise	MICE	PFAS	-0.201705	16.7744	-2.00415	-4.08208	0.0470562	0.469608	0.328265
1h post exercise	MICE	PIGQ	-0.527103	12.2227	-2.00328	-4.08369	0.0471533	0.469608	0.328265
1h post exercise	HIIE	MRPS28	0.37054	15.1945	2.00325	-4.08374	0.047156	0.469608	0.328265
1h post exercise	MICE	CCT3	-0.253237	20.4791	-2.00283	-4.0845	0.0472018	0.469608	0.328265
1h post exercise	MICE	SUCLA2	-0.193315	18.5578	-2.00064	-4.08848	0.0474387	0.47027	0.327653
1h post exercise	HIIE	DOP1B	0.370955	12.7321	2.00026	-4.08918	0.047482	0.47027	0.327653
1h post exercise	MICE	FGD2	-0.725254	11.7071	-1.99931	-4.09092	0.0475862	0.47027	0.327653
1h post exercise	HIIE	BAX	0.46131	17.4172	1.99927	-4.09098	0.0475898	0.47027	0.327653
1h post exercise	HIIE	ZMPSTE24	0.178502	17.0856	1.99782	-4.0936	0.0477464	0.47027	0.327653
1h post exercise	HIIE	MBLAC2	0.195549	15.7487	1.99732	-4.09451	0.0478016	0.47027	0.327653
1h post exercise	HIIE	ATP5IF1	0.28231	15.0869	1.99724	-4.09468	0.0478135	0.47027	0.327653
1h post exercise	MICE	SNIP1	-0.389806	13.5461	-1.99636	-4.09628	0.0479103	0.470318	0.327609
1h post exercise	HIIE	MYH14	0.689906	16.5471	1.99521	-4.09837	0.0480368	0.470318	0.327609
1h post exercise	HIIE	RPS21	0.565801	18.5365	1.99368	-4.10114	0.0482058	0.470318	0.327609
1h post exercise	HIIE	ANKRD13A	0.184527	16.0351	1.99342	-4.10158	0.0482311	0.470318	0.327609
1h post exercise	HIIE	AP3M1	0.134617	17.6453	1.99276	-4.10278	0.0483042	0.470318	0.327609
1h post exercise	HIIE	CEPT1	0.196717	16.9998	1.99219	-4.10383	0.0483689	0.470318	0.327609
1h post exercise	HIIE	EOGT	0.18296	14.8648	1.99155	-4.10498	0.0484389	0.470318	0.327609
1h post exercise	HIIE	KRT10	0.671448	14.8048	1.98945	-4.1088	0.0486758	0.470318	0.327609
1h post exercise	HIIE	MFSD10	0.336772	16.0994	1.98924	-4.10919	0.0486995	0.470318	0.327609
1h post exercise	HIIE	UBE4B	0.217085	13.4567	1.98878	-4.11	0.0487483	0.470318	0.327609
1h post exercise	MICE	USP11	-0.424583	14.0753	-1.98822	-4.11103	0.0488132	0.470318	0.327609
1h post exercise	HIIE	SEPTIN2	0.143915	20.1926	1.98814	-4.11116	0.0488199	0.470318	0.327609
1h post exercise	MICE	GNA13	-0.225481	18.9352	-1.98806	-4.11131	0.0488308	0.470318	0.327609
1h post exercise	MICE	GANAB	-0.138407	21.1717	-1.98695	-4.1133	0.0489523	0.470737	0.327222
1h post exercise	MICE	MBD4	-0.343112	12.206	-1.98613	-4.11481	0.0490469	0.470897	0.327074
1h post exercise	HIIE	MARCHF2	0.553042	15.1853	1.98424	-4.11822	0.04926	0.472192	0.325881
1h post exercise	HIIE	SORT1	0.198319	17.456	1.98295	-4.12054	0.0494045	0.472827	0.325298
1h post exercise	HIIE	SLC25A20	0.226851	18.0808	1.98153	-4.12311	0.0495666	0.473628	0.324563
1h post exercise	HIIE	FAM210B	0.30255	12.9381	1.9801	-4.12568	0.0497272	0.473728	0.324471
1h post exercise	MICE	MICALL2	-0.391788	13.8674	-1.98006	-4.12577	0.049734	0.473728	0.324471
1h post exercise	HIIE	ABHD10	0.198217	17.6363	1.97792	-4.12961	0.0499759	0.475283	0.323048
1h post exercise	HIIE	ITGAM	0.468057	18.4438	1.97595	-4.13317	0.0502027	0.476264	0.322153
1h post exercise	MICE	HMOX2	-0.297027	15.2413	-1.97508	-4.13474	0.0503028	0.476264	0.322153
1h post exercise	HIIE	PPIL3	0.228913	16.1442	1.97497	-4.13494	0.0503157	0.476264	0.322153
Post exercise	HIIE	WRAP73	0.610049	13.7965	3.20109	-1.38227	0.0017078	0.476944	0.321533
Post exercise	MICE	UBE2A	-0.587736	14.6906	-3.19574	-1.39537	0.0017375	0.476944	0.321533
1h post exercise	HIIE	FUCA2	0.186379	15.3381	1.97236	-4.13961	0.0506132	0.477954	0.320614
1h post exercise	MICE	ICMT	-0.325995	12.9629	-1.97084	-4.14236	0.0507916	0.477954	0.320614
1h post exercise	HIIE	CNOT3	0.230715	14.5848	1.97015	-4.14357	0.0508685	0.477954	0.320614
1h post exercise	HIIE	MIF4GD	0.212128	14.0799	1.97006	-4.14374	0.0508789	0.477954	0.320614
1h post exercise	HIIE	FCHO2	0.653749	12.4522	1.96922	-4.14526	0.050979	0.477954	0.320614
1h post exercise	MICE	SHMT2	-0.136823	19.2073	-1.96719	-4.14887	0.0512118	0.477954	0.320614
1h post exercise	MICE	POLDIP3	-0.337125	13.5937	-1.96609	-4.15088	0.051344	0.477954	0.320614
1h post exercise	HIIE	C2CD5	0.116015	16.2218	1.96579	-4.15139	0.0513761	0.477954	0.320614
1h post exercise	MICE	MAGED2	-0.320634	14.4219	-1.96556	-4.15182	0.0514056	0.477954	0.320614
1h post exercise	MICE	ETFB	-0.175119	19.0075	-1.96492	-4.15295	0.0514777	0.477954	0.320614
1h post exercise	HIIE	TADA2B	0.498222	14.8975	1.96436	-4.15397	0.0515463	0.477954	0.320614
1h post exercise	MICE	TUBA4A	-0.490945	23.0829	-1.96417	-4.15431	0.0515687	0.477954	0.320614
1h post exercise	HIIE	MCM4	0.247291	14.3283	1.96397	-4.15466	0.0515905	0.477954	0.320614
1h post exercise	MICE	CLCC1	-0.248684	13.5559	-1.96385	-4.15485	0.0516023	0.477954	0.320614
1h post exercise	HIIE	CPQ	0.21293	14.3564	1.96298	-4.15641	0.0517046	0.478169	0.320419
1h post exercise	MICE	CNDP2	-0.179798	20.055	-1.95991	-4.16189	0.0520663	0.478992	0.319672
1h post exercise	HIIE	HVCN1	0.387649	16.1514	1.95986	-4.16202	0.052076	0.478992	0.319672
1h post exercise	HIIE	EXD2	0.295086	12.0935	1.9589	-4.1637	0.0521858	0.478992	0.319672
1h post exercise	HIIE	HACL1	0.33863	13.7432	1.95836	-4.16468	0.0522526	0.478992	0.319672
1h post exercise	HIIE	MKRN2	0.227847	14.5061	1.95831	-4.16476	0.0522569	0.478992	0.319672
1h post exercise	MICE	SH2D3C	-0.29464	14.1691	-1.95819	-4.16499	0.0522734	0.478992	0.319672
1h post exercise	MICE	MTHFD1	-0.367233	18.6612	-1.95755	-4.16612	0.0523489	0.478992	0.319672
1h post exercise	MICE	COA1	-0.41227	13.1245	-1.95671	-4.16762	0.0524486	0.479178	0.319503
1h post exercise	MICE	AMDHD2	-0.189609	15.3114	-1.95537	-4.17	0.0526055	0.479343	0.319354
1h post exercise	HIIE	SLC35A4	0.169484	18.2674	1.9552	-4.17029	0.0526253	0.479343	0.319354
1h post exercise	HIIE	CHMP2A	0.140046	17.9484	1.95448	-4.17159	0.0527121	0.47941	0.319293
1h post exercise	HIIE	PDCL3	0.192809	14.0274	1.95371	-4.17295	0.0528035	0.479519	0.319194
1h post exercise	HIIE	VPS13D	0.297018	13.0616	1.95289	-4.17441	0.0529028	0.4797	0.31903
1h post exercise	HIIE	NFU1	0.321024	13.1766	1.95223	-4.17561	0.0529847	0.479722	0.319011
1h post exercise	HIIE	NPTN	0.252815	15.9308	1.95039	-4.17888	0.0532055	0.479884	0.318864
1h post exercise	HIIE	TMC6	0.358044	13.4357	1.94938	-4.18068	0.0533272	0.479884	0.318864
1h post exercise	HIIE	ALAD	0.203837	19.677	1.94927	-4.18087	0.0533404	0.479884	0.318864
1h post exercise	HIIE	TECPR2	0.199086	14.3663	1.94818	-4.18278	0.0534685	0.479884	0.318864
1h post exercise	HIIE	KCNN4	0.322744	12.3003	1.94817	-4.1828	0.0534707	0.479884	0.318864
1h post exercise	MICE	IMPACT	-0.359885	12.7744	-1.94812	-4.18291	0.0534794	0.479884	0.318864
1h post exercise	HIIE	C1QBP	0.262823	17.9972	1.94609	-4.18652	0.0537252	0.480946	0.317904
1h post exercise	HIIE	ARRDC1	0.17567	14.8423	1.9453	-4.18789	0.0538176	0.480946	0.317904
1h post exercise	HIIE	TXNRD1	0.179046	16.6649	1.94515	-4.18817	0.0538366	0.480946	0.317904
1h post exercise	HIIE	JPT1	0.429589	13.9401	1.94444	-4.18944	0.0539256	0.481029	0.317829
1h post exercise	MICE	NRBP1	-0.215338	16.4823	-1.94363	-4.19087	0.0540243	0.481199	0.317676
1h post exercise	HIIE	MRPS24	0.357357	14.9016	1.94167	-4.19434	0.0542632	0.481872	0.317069
1h post exercise	HIIE	DAD1	0.170733	19.0922	1.94118	-4.19519	0.0543206	0.481872	0.317069
1h post exercise	HIIE	ELANE	0.610576	19.2538	1.94105	-4.19544	0.0543392	0.481872	0.317069
1h post exercise	HIIE	NEK9	0.106957	17.533	1.94029	-4.19677	0.0544298	0.48188	0.317061
1h post exercise	MICE	DAB2	-0.341639	17.2494	-1.93797	-4.20088	0.0547178	0.48188	0.317061
1h post exercise	HIIE	RBM42	0.344856	15.0651	1.9376	-4.20153	0.0547631	0.48188	0.317061
1h post exercise	MICE	ECHDC1	-0.259082	16.6496	-1.9368	-4.20296	0.0548629	0.48188	0.317061
1h post exercise	HIIE	MAP3K7	0.240581	15.547	1.93637	-4.20372	0.054916	0.48188	0.317061
1h post exercise	HIIE	PRPF39	0.28489	13.9111	1.93535	-4.20551	0.0550419	0.48188	0.317061
1h post exercise	HIIE	UBASH3A	0.515654	13.1527	1.93518	-4.20582	0.0550633	0.48188	0.317061
1h post exercise	HIIE	SIGLEC9	0.443782	13.9064	1.9339	-4.20806	0.0552211	0.48188	0.317061
1h post exercise	HIIE	CD38	0.280747	14.5932	1.93345	-4.20886	0.0552775	0.48188	0.317061
1h post exercise	HIIE	PAICS	0.134051	18.5992	1.9334	-4.20894	0.0552811	0.48188	0.317061
1h post exercise	HIIE	CSDE1	0.168114	16.2808	1.93283	-4.20993	0.0553511	0.48188	0.317061
1h post exercise	MICE	PTP4A3	-0.377964	13.0994	-1.93236	-4.21077	0.0554125	0.48188	0.317061
1h post exercise	HIIE	MRPL17	0.260628	15.6224	1.93222	-4.21103	0.0554304	0.48188	0.317061
1h post exercise	HIIE	RABEP1	0.235053	13.1186	1.93198	-4.21143	0.0554573	0.48188	0.317061
1h post exercise	HIIE	APOBEC3B	0.40481	13.6549	1.92971	-4.21544	0.0557438	0.483106	0.315958
1h post exercise	HIIE	AGTRAP	0.334776	15.2354	1.9296	-4.21565	0.0557583	0.483106	0.315958
1h post exercise	HIIE	LTF	0.974783	21.2056	1.92637	-4.22132	0.0561637	0.485921	0.313434
Post exercise	MICE	ZDHHC21	-0.518793	11.9732	-3.14459	-1.5195	0.00204596	0.486534	0.312887
Post exercise	MICE	ALG6	-0.605103	14.1907	-3.13088	-1.55271	0.00213761	0.486534	0.312887
Post exercise	MICE	MAP1LC3B	-0.656208	16.3822	-3.12653	-1.56317	0.00216728	0.486534	0.312887
Post exercise	HIIE	GPSM3	0.465364	14.5354	3.12008	-1.57863	0.00221196	0.486534	0.312887
Post exercise	HIIE	CLTCL1	0.810659	12.4257	3.11417	-1.59281	0.00225373	0.486534	0.312887
Post exercise	HIIE	ELOVL5	0.574019	14.5387	3.11387	-1.59352	0.00225583	0.486534	0.312887
1h post exercise	HIIE	CNPY2	0.303651	15.0654	1.92261	-4.22792	0.0566389	0.489178	0.310533
1h post exercise	HIIE	HLA-DPA1	0.467478	14.3559	1.92211	-4.22879	0.0567022	0.489178	0.310533
1h post exercise	HIIE	NSFL1C	0.167559	17.3796	1.91857	-4.23498	0.0571509	0.492345	0.30773
1h post exercise	HIIE	DTD2	0.391344	12.1302	1.91745	-4.23696	0.0572972	0.492432	0.307653
1h post exercise	HIIE	PSMB2	0.166943	18.911	1.9165	-4.2386	0.0574158	0.492432	0.307653
1h post exercise	HIIE	LSM2	0.254027	16.2904	1.91636	-4.23885	0.0574361	0.492432	0.307653
1h post exercise	HIIE	ALDOC	0.244509	20.9995	1.91562	-4.24015	0.0575313	0.492432	0.307653
1h post exercise	HIIE	SLC17A5	0.18157	16.0561	1.91315	-4.24445	0.0578473	0.492432	0.307653
1h post exercise	HIIE	ACYP2	0.181533	15.4777	1.91289	-4.24491	0.0578809	0.492432	0.307653
1h post exercise	HIIE	PDHA1	0.134646	19.6228	1.91285	-4.24498	0.0578859	0.492432	0.307653
1h post exercise	HIIE	MPDU1	0.206536	19.0873	1.91277	-4.24513	0.0578988	0.492432	0.307653
1h post exercise	MICE	VKORC1	-0.462843	16.8624	-1.91242	-4.24574	0.0579441	0.492432	0.307653
1h post exercise	HIIE	ADGRE5	0.405559	14.3147	1.91217	-4.24617	0.0579764	0.492432	0.307653
1h post exercise	HIIE	CSF2RA	0.49615	12.929	1.9082	-4.25309	0.0584923	0.494743	0.30562
1h post exercise	HIIE	TMCO1	0.155713	16.2471	1.90815	-4.25317	0.0584959	0.494743	0.30562
1h post exercise	MICE	CMTM5	-0.411231	19.0909	-1.90801	-4.25343	0.0585171	0.494743	0.30562
1h post exercise	HIIE	CEP250	0.505668	15.9732	1.90756	-4.25421	0.0585762	0.494743	0.30562
1h post exercise	HIIE	ISOC1	0.165227	18.5877	1.90636	-4.25627	0.0587288	0.49534	0.305097
1h post exercise	MICE	AGK	-0.175401	17.2343	-1.90283	-4.26242	0.0591929	0.498557	0.302285
1h post exercise	MICE	BLVRA	-0.127404	19.1488	-1.90199	-4.26388	0.0593039	0.498797	0.302076
1h post exercise	HIIE	TMED10	0.12621	18.933	1.90072	-4.26607	0.0594706	0.499503	0.301462
1h post exercise	HIIE	H2BC9	0.398461	14.446	1.9001	-4.26717	0.0595566	0.499531	0.301437
1h post exercise	HIIE	PRSS3	0.382156	17.3642	1.89679	-4.27291	0.059996	0.502354	0.29899
1h post exercise	MICE	TMPO	-0.388972	19.7225	-1.89631	-4.27373	0.0600595	0.502354	0.29899
1h post exercise	HIIE	PADI4	0.44086	16.5106	1.89432	-4.27718	0.0603258	0.502931	0.298491
1h post exercise	HIIE	ITFG1	0.282729	13.2443	1.89416	-4.27744	0.0603446	0.502931	0.298491
1h post exercise	HIIE	PRSS2	0.748176	17.8155	1.89258	-4.28018	0.060558	0.502931	0.298491
1h post exercise	HIIE	TNIP2	0.290598	12.236	1.89205	-4.28108	0.0606264	0.502931	0.298491
1h post exercise	HIIE	NME7	0.18127	14.7171	1.89178	-4.28154	0.0606622	0.502931	0.298491
1h post exercise	MICE	KHSRP	-0.345715	16.976	-1.89036	-4.28401	0.0608568	0.502931	0.298491
1h post exercise	HIIE	CDIPT	0.315619	17.8425	1.89001	-4.28461	0.0609038	0.502931	0.298491
1h post exercise	HIIE	HSD17B4	0.161495	20.5669	1.88979	-4.28498	0.0609304	0.502931	0.298491
1h post exercise	HIIE	UQCRFS1	0.187685	18.1921	1.88952	-4.28546	0.0609692	0.502931	0.298491
1h post exercise	HIIE	HM13	0.171956	18.2458	1.88811	-4.28787	0.0611573	0.502931	0.298491
1h post exercise	MICE	MGAM2	-1.18529	11.623	-1.88712	-4.28961	0.0612953	0.502931	0.298491
1h post exercise	HIIE	SOD1	0.267618	18.4046	1.88376	-4.29538	0.0617514	0.502931	0.298491
1h post exercise	HIIE	GGH	0.211629	17.2412	1.883	-4.2967	0.0618564	0.502931	0.298491
1h post exercise	HIIE	LRRC57	0.141489	16.7722	1.88282	-4.29699	0.0618775	0.502931	0.298491
1h post exercise	HIIE	SLK	0.168946	16.551	1.88105	-4.30002	0.0621192	0.502931	0.298491
1h post exercise	HIIE	PAN2	0.142655	13.9987	1.88096	-4.30019	0.0621321	0.502931	0.298491
1h post exercise	MICE	CYTH4	-0.417608	13.5491	-1.88056	-4.30088	0.0621894	0.502931	0.298491
1h post exercise	HIIE	SF3B5	0.43783	13.5439	1.88053	-4.30094	0.0621942	0.502931	0.298491
1h post exercise	HIIE	IL17RA	0.269391	14.8002	1.88018	-4.30154	0.062242	0.502931	0.298491
1h post exercise	HIIE	VAMP8	0.201125	15.9903	1.87997	-4.30189	0.0622692	0.502931	0.298491
1h post exercise	HIIE	TACC2	0.211992	19.7797	1.87983	-4.30214	0.0622902	0.502931	0.298491
1h post exercise	HIIE	UQCR10	0.211645	19.0231	1.87941	-4.30287	0.0623485	0.502931	0.298491
1h post exercise	HIIE	RIOX2	0.518659	12.7219	1.8793	-4.30305	0.0623632	0.502931	0.298491
1h post exercise	MICE	ARHGAP25	-0.28933	14.7671	-1.87839	-4.30461	0.0624885	0.502931	0.298491
1h post exercise	HIIE	CPNE2	0.296914	15.9625	1.8781	-4.3051	0.0625276	0.502931	0.298491
1h post exercise	HIIE	PGAM5	0.153608	18.0915	1.87699	-4.307	0.0626788	0.502931	0.298491
1h post exercise	MICE	GMPPA	-0.185645	16.7437	-1.87675	-4.30741	0.0627123	0.502931	0.298491
1h post exercise	HIIE	SYNJ1	0.189882	14.2139	1.87646	-4.3079	0.0627511	0.502931	0.298491
1h post exercise	HIIE	GNG10	0.41525	14.9355	1.87552	-4.30954	0.0628855	0.502931	0.298491
1h post exercise	HIIE	TRMT1L	0.35133	12.4534	1.87535	-4.30982	0.0629085	0.502931	0.298491
1h post exercise	HIIE	ATP5F1E	0.204424	17.7762	1.87527	-4.30996	0.0629196	0.502931	0.298491
1h post exercise	HIIE	DNAJA1	0.156866	15.6961	1.87508	-4.31027	0.0629426	0.502931	0.298491
1h post exercise	HIIE	STK26	0.274541	16.4689	1.87507	-4.3103	0.0629473	0.502931	0.298491
1h post exercise	HIIE	GALNT2	0.189246	16.3515	1.87461	-4.31108	0.063009	0.502931	0.298491
1h post exercise	HIIE	SEPSECS	0.195516	14.0677	1.87376	-4.31253	0.0631264	0.502931	0.298491
1h post exercise	HIIE	GPR89A	0.193949	15.2653	1.87376	-4.31254	0.0631266	0.502931	0.298491
1h post exercise	HIIE	GLO1	0.179144	17.5793	1.87205	-4.31545	0.0633642	0.503591	0.297922
1h post exercise	HIIE	HPRT1	0.146245	19.4357	1.87196	-4.3156	0.0633763	0.503591	0.297922
1h post exercise	HIIE	ADRM1	0.2346	16.8439	1.86771	-4.32289	0.0639751	0.506929	0.295053
1h post exercise	HIIE	ENOSF1	0.389299	13.2695	1.86721	-4.32374	0.064045	0.506929	0.295053
1h post exercise	HIIE	MANBA	0.201634	17.8689	1.86691	-4.32424	0.0640862	0.506929	0.295053
1h post exercise	MICE	SEC22A	-0.372653	14.7962	-1.86659	-4.32479	0.0641321	0.506929	0.295053
1h post exercise	HIIE	DCP2	0.33531	13.2849	1.86506	-4.3274	0.0643476	0.507967	0.294164
1h post exercise	HIIE	RBKS	0.355195	16.5836	1.86348	-4.33008	0.0645706	0.508563	0.293655
1h post exercise	HIIE	CPT2	0.154256	17.2662	1.86331	-4.33036	0.0645915	0.508563	0.293655
1h post exercise	HIIE	GOT2	0.199562	20.2895	1.86243	-4.33188	0.0647203	0.508914	0.293356
1h post exercise	HIIE	ADISSP	0.216159	14.8579	1.86102	-4.33427	0.0649191	0.509472	0.292879
1h post exercise	HIIE	NEDD8	0.190238	17.5101	1.85987	-4.33622	0.0650822	0.509472	0.292879
1h post exercise	HIIE	FTL	0.472812	14.7305	1.85881	-4.33803	0.065235	0.509472	0.292879
1h post exercise	HIIE	POLR1F	0.342294	12.9139	1.85818	-4.3391	0.0653256	0.509472	0.292879
1h post exercise	HIIE	HPX	0.319773	17.3805	1.85745	-4.34034	0.0654304	0.509472	0.292879
1h post exercise	MICE	ATP5F1B	-0.397623	22.5646	-1.85657	-4.34183	0.0655562	0.509472	0.292879
1h post exercise	HIIE	COMMD4	0.207883	14.5415	1.85649	-4.34195	0.0655642	0.509472	0.292879
1h post exercise	MICE	PSMD11	-0.167032	17.3121	-1.85643	-4.34205	0.0655726	0.509472	0.292879
1h post exercise	HIIE	KDM1B	0.346652	12.8496	1.85631	-4.34227	0.0655934	0.509472	0.292879
1h post exercise	MICE	TRAP1	-0.219234	16.818	-1.85602	-4.34277	0.065635	0.509472	0.292879
1h post exercise	HIIE	TMEM94	0.277389	13.8707	1.85508	-4.34435	0.0657693	0.50986	0.292549
1h post exercise	MICE	TUFM	-0.27005	20.4233	-1.8537	-4.3467	0.0659689	0.510429	0.292065
1h post exercise	HIIE	PSMA7	0.185224	20.4056	1.85339	-4.34721	0.0660117	0.510429	0.292065
1h post exercise	HIIE	CSNK1G1	0.132683	15.5654	1.85155	-4.35033	0.0662766	0.511208	0.291402
1h post exercise	MICE	PRPS2	-0.179965	16.046	-1.85151	-4.35039	0.0662818	0.511208	0.291402
Post exercise	HIIE	RNF7	1.46645	14.029	3.07192	-1.69338	0.00257384	0.512277	0.290495
Post exercise	MICE	JAML	-0.798332	13.5138	-3.06984	-1.69828	0.00259058	0.512277	0.290495
Post exercise	MICE	APOL3	-0.718965	13.8543	-3.06505	-1.70962	0.00262967	0.512277	0.290495
1h post exercise	MICE	PAK2	-0.400244	17.4555	-1.84903	-4.35459	0.0666444	0.513349	0.289587
1h post exercise	HIIE	CD53	0.444051	15.988	1.8479	-4.3565	0.0668089	0.513961	0.28907
1h post exercise	MICE	MKKS	-0.333138	15.4945	-1.84672	-4.3585	0.0669814	0.514288	0.288793
1h post exercise	MICE	WDR37	-0.170138	15.7298	-1.84642	-4.35899	0.0670218	0.514288	0.288793
1h post exercise	HIIE	CCNT1	0.55696	11.4671	1.84447	-4.36229	0.06731	0.514958	0.288228
1h post exercise	HIIE	TGFBRAP1	0.166872	14.4108	1.84433	-4.36251	0.0673276	0.514958	0.288228
1h post exercise	HIIE	ENDOD1	0.244788	19.1288	1.8441	-4.36292	0.0673649	0.514958	0.288228
1h post exercise	HIIE	PMPCB	0.131998	17.0689	1.84102	-4.36809	0.0678145	0.517715	0.285909
1h post exercise	HIIE	VSIR	0.252071	15.2043	1.84048	-4.36901	0.0678971	0.517715	0.285909
1h post exercise	HIIE	ME2	0.193674	20.1051	1.83931	-4.37098	0.0680705	0.518247	0.285463
1h post exercise	MICE	EIF1B	-0.433122	12.7712	-1.83707	-4.37474	0.068402	0.518247	0.285463
1h post exercise	MICE	HNRNPH3	-0.355922	16.8833	-1.8363	-4.37604	0.0685173	0.518247	0.285463
1h post exercise	HIIE	BRI3BP	0.162097	16.5462	1.83591	-4.37668	0.0685716	0.518247	0.285463
1h post exercise	HIIE	RAB22A	0.187545	14.2186	1.83577	-4.37691	0.0685921	0.518247	0.285463
1h post exercise	HIIE	RAB2A	0.137093	19.4864	1.83571	-4.37701	0.0686012	0.518247	0.285463
1h post exercise	HIIE	ABHD5	0.314952	14.7053	1.83534	-4.37765	0.0686598	0.518247	0.285463
1h post exercise	HIIE	MARCHF5	0.218148	14.2004	1.83516	-4.37794	0.068684	0.518247	0.285463
1h post exercise	MICE	MINDY1	-0.26957	18.2071	-1.83481	-4.37854	0.0687391	0.518247	0.285463
1h post exercise	MICE	PCK2	-0.201151	16.7951	-1.83396	-4.37996	0.0688657	0.518421	0.285317
1h post exercise	HIIE	SLC66A2	0.124369	14.0128	1.83348	-4.38075	0.0689339	0.518421	0.285317
1h post exercise	HIIE	GAN	0.289595	13.8956	1.83292	-4.38171	0.0690219	0.518437	0.285304
1h post exercise	HIIE	FGD3	0.166792	16.7051	1.83186	-4.38347	0.0691765	0.518953	0.284872
1h post exercise	MICE	ATPAF1	-0.213775	12.8268	-1.83037	-4.38596	0.0694007	0.519989	0.284006
1h post exercise	MICE	SAMD9L	-0.302599	13.4461	-1.82903	-4.38822	0.069606	0.520881	0.283262
1h post exercise	HIIE	TPMT	0.224262	15.2538	1.82571	-4.39377	0.0701082	0.52213	0.282221
1h post exercise	HIIE	MMP8	0.846999	14.0851	1.82568	-4.39383	0.070113	0.52213	0.282221
1h post exercise	HIIE	SLC25A40	0.212688	15.688	1.82525	-4.39454	0.0701782	0.52213	0.282221
1h post exercise	MICE	DDX3X	-0.143922	18.9679	-1.82447	-4.39583	0.070293	0.52213	0.282221
1h post exercise	HIIE	DLAT	0.143279	17.8277	1.82424	-4.39621	0.0703279	0.52213	0.282221
1h post exercise	MICE	TAF5L	-0.538554	14.3604	-1.82387	-4.39683	0.0703866	0.52213	0.282221
1h post exercise	MICE	CDK6	-0.297407	13.0956	-1.82362	-4.39725	0.0704247	0.52213	0.282221
1h post exercise	MICE	LPL	-0.466024	19.9014	-1.82336	-4.39769	0.0704647	0.52213	0.282221
1h post exercise	HIIE	TXNDC5	0.242731	18.7296	1.82204	-4.39988	0.0706654	0.522799	0.281665
1h post exercise	MICE	STXBP2	-0.466748	19.6213	-1.82065	-4.40221	0.0708792	0.522799	0.281665
1h post exercise	HIIE	PELO	0.139922	12.8841	1.81912	-4.40473	0.0711092	0.522799	0.281665
1h post exercise	HIIE	PTPN9	0.315668	13.8987	1.81905	-4.40487	0.0711236	0.522799	0.281665
1h post exercise	HIIE	ADAM8	0.326982	13.0135	1.81877	-4.40534	0.0711673	0.522799	0.281665
1h post exercise	MICE	MAP2K3	-0.164486	16.9571	-1.81833	-4.40605	0.071231	0.522799	0.281665
1h post exercise	HIIE	UBE2M	0.102624	18.6758	1.81811	-4.40642	0.0712645	0.522799	0.281665
1h post exercise	MICE	ZFP62	-0.639393	10.6447	-1.81775	-4.40704	0.0713242	0.522799	0.281665
1h post exercise	HIIE	SLC37A4	0.274557	15.5497	1.81768	-4.40715	0.071334	0.522799	0.281665
1h post exercise	HIIE	DNAJA2	0.126918	18.0654	1.81594	-4.41003	0.0715996	0.524109	0.280578
1h post exercise	HIIE	MIOS	0.130739	15.3305	1.81407	-4.41314	0.0718886	0.525182	0.27969
1h post exercise	MICE	SEC22B	-0.121521	17.3514	-1.81333	-4.41436	0.0720031	0.525182	0.27969
1h post exercise	MICE	CALU	-0.396039	16.4279	-1.81332	-4.41438	0.0720071	0.525182	0.27969
1h post exercise	HIIE	NPC2	0.622042	17.2395	1.81136	-4.41765	0.0723128	0.526263	0.278798
1h post exercise	HIIE	RPL36	0.399878	17.3812	1.80983	-4.42017	0.0725502	0.526263	0.278798
1h post exercise	HIIE	DLST	0.163252	18.119	1.80931	-4.42103	0.0726289	0.526263	0.278798
1h post exercise	HIIE	HBD	0.579189	14.7482	1.80913	-4.42133	0.0726595	0.526263	0.278798
1h post exercise	HIIE	SORL1	0.372206	15.0682	1.8089	-4.42172	0.0726963	0.526263	0.278798
1h post exercise	HIIE	OTUD6B	0.221722	14.8715	1.80857	-4.42227	0.0727474	0.526263	0.278798
1h post exercise	MICE	CD247	-0.300424	15.7285	-1.80787	-4.42342	0.0728572	0.526263	0.278798
1h post exercise	HIIE	AIDA	0.163625	15.7577	1.80763	-4.4238	0.0728909	0.526263	0.278798
1h post exercise	HIIE	FPR2	0.356094	15.1457	1.80716	-4.42459	0.0729676	0.526263	0.278798
1h post exercise	HIIE	ADAM17	0.216939	13.5877	1.80677	-4.42523	0.0730267	0.526263	0.278798
1h post exercise	HIIE	KLKB1	0.293303	12.6641	1.80603	-4.42645	0.0731436	0.526477	0.27862
1h post exercise	HIIE	EIF2S1	0.0984451	19.0271	1.80526	-4.42772	0.0732629	0.526708	0.27843
1h post exercise	HIIE	CASP6	0.172071	16.5066	1.80462	-4.42878	0.0733646	0.526812	0.278344
1h post exercise	HIIE	MYH11	0.57435	17.4322	1.80273	-4.4319	0.0736645	0.52757	0.27772
1h post exercise	HIIE	LGALS9	0.419319	15.1454	1.80217	-4.43284	0.0737543	0.52757	0.27772
1h post exercise	MICE	POTEI	-0.664501	20.1448	-1.80079	-4.43511	0.0739723	0.52757	0.27772
1h post exercise	HIIE	RAB8B	0.139414	18.1569	1.79945	-4.4373	0.0741815	0.52757	0.27772
1h post exercise	MICE	ABCB8	-0.366347	12.2661	-1.79913	-4.43785	0.0742362	0.52757	0.27772
1h post exercise	HIIE	PPP3CB	0.108091	18.9709	1.79893	-4.43817	0.0742651	0.52757	0.27772
1h post exercise	HIIE	WDR45	0.211045	14.4763	1.79855	-4.43879	0.0743257	0.52757	0.27772
1h post exercise	HIIE	SEMA4D	0.263606	13.9518	1.7985	-4.43887	0.0743355	0.52757	0.27772
1h post exercise	MICE	CLIC3	-0.428329	13.724	-1.79738	-4.44073	0.0745147	0.52757	0.27772
1h post exercise	MICE	JMJD7	-0.275015	13.3201	-1.79695	-4.44143	0.0745827	0.52757	0.27772
1h post exercise	HIIE	CD163	0.497718	14.6272	1.79663	-4.44196	0.0746342	0.52757	0.27772
1h post exercise	HIIE	CNP	0.126468	18.2233	1.79628	-4.44252	0.0746868	0.52757	0.27772
1h post exercise	MICE	GNAQ	-0.229029	20.9518	-1.79566	-4.44355	0.0747891	0.52757	0.27772
1h post exercise	HIIE	ETFDH	0.192752	16.7027	1.7954	-4.44397	0.0748297	0.52757	0.27772
1h post exercise	HIIE	DEPDC5	0.243455	13.0572	1.79521	-4.44428	0.0748582	0.52757	0.27772
1h post exercise	HIIE	TMUB1	0.393465	15.2824	1.79487	-4.44485	0.074916	0.52757	0.27772
1h post exercise	HIIE	CREBBP	0.305713	13.9612	1.79377	-4.44666	0.0750928	0.52757	0.27772
1h post exercise	MICE	SLC9A6	-0.54644	14.2841	-1.79359	-4.44696	0.0751215	0.52757	0.27772
1h post exercise	HIIE	ARFGAP3	0.182091	14.0594	1.79351	-4.44706	0.07513	0.52757	0.27772
1h post exercise	MICE	PLCG2	-0.155985	18.0278	-1.79132	-4.45066	0.0754829	0.529004	0.276541
1h post exercise	MICE	NDE1	-0.554549	13.9809	-1.79113	-4.45099	0.0755175	0.529004	0.276541
1h post exercise	MICE	MBD1	-0.23633	15.4891	-1.79063	-4.4518	0.075597	0.529004	0.276541
1h post exercise	MICE	KAT8	-0.784989	13.1079	-1.78809	-4.45597	0.0760085	0.530695	0.275155
1h post exercise	HIIE	TSC1	0.183598	12.6301	1.78803	-4.45605	0.0760144	0.530695	0.275155
1h post exercise	HIIE	ATP11C	0.168392	13.7441	1.78507	-4.4609	0.0764961	0.53337	0.272972
1h post exercise	HIIE	BRPF1	0.331667	14.4059	1.78461	-4.46166	0.0765742	0.53337	0.272972
1h post exercise	HIIE	PTBP2	0.765886	14.443	1.78057	-4.46825	0.0772351	0.534677	0.271909
1h post exercise	HIIE	LMAN2	0.170072	19.9009	1.78039	-4.46854	0.0772627	0.534677	0.271909
1h post exercise	HIIE	TRAPPC9	0.0955069	15.1395	1.77917	-4.47053	0.0774629	0.534677	0.271909
1h post exercise	HIIE	ITIH2	0.278134	15.0122	1.77901	-4.4708	0.0774924	0.534677	0.271909
1h post exercise	HIIE	DRG2	0.135977	15.7014	1.7783	-4.47194	0.0776062	0.534677	0.271909
1h post exercise	MICE	TIMM50	-0.255447	16.263	-1.77817	-4.47217	0.0776313	0.534677	0.271909
1h post exercise	HIIE	MIEN1	0.36863	14.7142	1.77779	-4.47279	0.0776944	0.534677	0.271909
1h post exercise	MICE	TLE5	-0.397856	14.9813	-1.77776	-4.47284	0.0776993	0.534677	0.271909
1h post exercise	HIIE	IGHM	0.342567	17.9958	1.77742	-4.47339	0.0777548	0.534677	0.271909
1h post exercise	HIIE	SNRPG	0.496023	18.3727	1.77682	-4.47436	0.0778538	0.534677	0.271909
1h post exercise	MICE	SARNP	-0.3603	17.6128	-1.7768	-4.4744	0.0778575	0.534677	0.271909
1h post exercise	HIIE	PLEKHO2	0.163569	17.8585	1.77642	-4.475	0.0779164	0.534677	0.271909
1h post exercise	HIIE	MGAT1	0.160119	16.5497	1.77385	-4.47918	0.0783433	0.534677	0.271909
1h post exercise	HIIE	DNAJC5	0.295387	13.6178	1.77383	-4.47922	0.0783492	0.534677	0.271909
1h post exercise	HIIE	MTMR6	0.14505	14.7914	1.77347	-4.4798	0.0784061	0.534677	0.271909
1h post exercise	HIIE	TMEM65	0.245308	15.1713	1.77299	-4.48058	0.078489	0.534677	0.271909
1h post exercise	HIIE	ZDHHC20	0.191512	15.2224	1.7724	-4.48154	0.0785859	0.534677	0.271909
1h post exercise	HIIE	RNF31	0.0993065	15.5381	1.77205	-4.48211	0.0786436	0.534677	0.271909
1h post exercise	MICE	HYCC1	-0.339483	15.5931	-1.77157	-4.48289	0.0787257	0.534677	0.271909
1h post exercise	HIIE	LSM3	0.351818	16.2392	1.77138	-4.4832	0.0787576	0.534677	0.271909
1h post exercise	HIIE	LENG8	0.370182	14.2915	1.76992	-4.48556	0.0790013	0.534677	0.271909
1h post exercise	HIIE	CD55	0.588601	17.916	1.76977	-4.48581	0.0790273	0.534677	0.271909
1h post exercise	HIIE	KRT6A	0.376182	15.9984	1.76974	-4.48586	0.079032	0.534677	0.271909
1h post exercise	MICE	RNF114	-0.312397	13.9808	-1.76963	-4.48604	0.0790507	0.534677	0.271909
1h post exercise	HIIE	NIPSNAP2	0.149506	17.9622	1.76931	-4.48654	0.0791004	0.534677	0.271909
1h post exercise	MICE	LYRM7	-0.305759	14.3971	-1.76912	-4.48687	0.0791366	0.534677	0.271909
1h post exercise	HIIE	SH3BGRL2	0.241771	20.0095	1.7686	-4.4877	0.0792223	0.534677	0.271909
1h post exercise	HIIE	VDAC1	0.303005	20.0572	1.76833	-4.48814	0.0792677	0.534677	0.271909
1h post exercise	MICE	NRDE2	-0.471332	12.0406	-1.76797	-4.48873	0.0793294	0.534677	0.271909
1h post exercise	MICE	TRUB1	-0.292148	12.6004	-1.76451	-4.49433	0.0799107	0.537973	0.269239
1h post exercise	HIIE	VDAC3	0.273169	20.9255	1.76401	-4.49514	0.0799967	0.537973	0.269239
1h post exercise	MICE	SLC25A24	-0.239167	18.7159	-1.76252	-4.49754	0.080248	0.539063	0.268361
1h post exercise	HIIE	PRG2	0.75239	16.2648	1.76002	-4.50157	0.0806729	0.540757	0.266998
1h post exercise	MICE	TIPRL	-0.179271	16.6805	-1.75997	-4.50164	0.0806792	0.540757	0.266998
1h post exercise	HIIE	LAMTOR4	0.369728	17.6459	1.75943	-4.50253	0.0807736	0.540789	0.266972
1h post exercise	HIIE	APMAP	0.247706	19.5362	1.75879	-4.50357	0.0808837	0.540926	0.266862
1h post exercise	HIIE	CARD11	0.27037	14.4344	1.75822	-4.50447	0.0809799	0.540926	0.266862
1h post exercise	HIIE	TM9SF2	0.13676	18.432	1.75733	-4.5059	0.0811291	0.540926	0.266862
1h post exercise	MICE	SMIM12	-0.34344	11.398	-1.75686	-4.50666	0.0812112	0.540926	0.266862
1h post exercise	HIIE	ATP6V1E1	0.197805	17.1244	1.75633	-4.50753	0.0813044	0.540926	0.266862
1h post exercise	HIIE	AGO2	0.159657	15.1398	1.75615	-4.5078	0.0813315	0.540926	0.266862
1h post exercise	HIIE	PPP5C	0.138204	15.425	1.75546	-4.50891	0.0814497	0.541081	0.266738
1h post exercise	HIIE	NDUFB5	0.252803	14.4676	1.75499	-4.50968	0.081534	0.541081	0.266738
1h post exercise	HIIE	ARGLU1	0.547025	15.255	1.75391	-4.51141	0.0817189	0.541458	0.266435
1h post exercise	HIIE	PSMB3	0.166164	18.5922	1.7536	-4.5119	0.0817702	0.541458	0.266435
1h post exercise	MICE	FPR1	-0.328452	14.9094	-1.75304	-4.51281	0.0818685	0.541516	0.266389
1h post exercise	HIIE	IKBKB	0.14801	16.1332	1.75163	-4.51506	0.0821085	0.542509	0.265593
Post exercise	HIIE	LRRC75A	0.81904	12.6771	3.03583	-1.77837	0.00288004	0.543518	0.264786
1h post exercise	HIIE	PPP1CB	0.136438	18.974	1.74966	-4.51823	0.0824509	0.544176	0.264261
1h post exercise	MICE	SRBD1	-0.27193	13.1075	-1.74913	-4.51909	0.0825445	0.544199	0.264242
1h post exercise	HIIE	PRDX2	0.243573	18.7233	1.74851	-4.52008	0.082653	0.54432	0.264146
1h post exercise	HIIE	TREML2	0.305798	15.1617	1.74746	-4.52176	0.0828358	0.544929	0.26366
1h post exercise	MICE	CLTC	-0.160051	21.1469	-1.74582	-4.52437	0.0831176	0.546189	0.262657
1h post exercise	MICE	HSPA5	-0.231482	22.3436	-1.74461	-4.52632	0.0833319	0.546858	0.262125
1h post exercise	HIIE	TBC1D9B	0.100198	16.3988	1.74316	-4.52863	0.0835835	0.546858	0.262125
1h post exercise	HIIE	PUDP	0.324415	15.6346	1.74203	-4.53044	0.0837846	0.546858	0.262125
1h post exercise	HIIE	MRPS30	0.197592	14.4096	1.74185	-4.53073	0.0838135	0.546858	0.262125
1h post exercise	HIIE	ELOB	0.153158	17.2617	1.74033	-4.53315	0.0840811	0.546858	0.262125
1h post exercise	HIIE	PPP4C	0.23033	15.6977	1.74032	-4.53317	0.0840855	0.546858	0.262125
1h post exercise	HIIE	CROT	0.316398	13.1571	1.74014	-4.53346	0.0841176	0.546858	0.262125
1h post exercise	MICE	PKD1	-0.579038	17.5366	-1.73996	-4.53376	0.0841498	0.546858	0.262125
1h post exercise	HIIE	SLC25A11	0.140011	18.9731	1.73987	-4.53388	0.0841613	0.546858	0.262125
1h post exercise	HIIE	NSMCE1	0.315979	14.0624	1.73944	-4.53458	0.0842404	0.546858	0.262125
1h post exercise	HIIE	TMEM160	0.297473	16.0781	1.73724	-4.53808	0.0846287	0.546858	0.262125
1h post exercise	HIIE	CYB561D2	0.177842	16.8939	1.73708	-4.53833	0.0846559	0.546858	0.262125
1h post exercise	MICE	CCT6A	-0.202869	20.0523	-1.73682	-4.53875	0.0847041	0.546858	0.262125
1h post exercise	HIIE	RANBP6	0.309017	12.4294	1.73659	-4.53912	0.0847451	0.546858	0.262125
1h post exercise	HIIE	FCGR1A	0.403416	13.6569	1.73641	-4.5394	0.0847765	0.546858	0.262125
1h post exercise	HIIE	MIX23	0.212307	16.9305	1.73611	-4.53989	0.0848306	0.546858	0.262125
1h post exercise	HIIE	MMP9	0.974724	15.5785	1.73573	-4.54049	0.0848972	0.546858	0.262125
1h post exercise	HIIE	THBS4	0.276523	14.6876	1.73568	-4.54057	0.0849061	0.546858	0.262125
1h post exercise	HIIE	TP53I3	0.208624	16.1818	1.73517	-4.54137	0.0849961	0.546858	0.262125
1h post exercise	HIIE	TLR8	0.312187	13.9401	1.73498	-4.54168	0.0850306	0.546858	0.262125
1h post exercise	MICE	ST13	-0.221361	18.6803	-1.73085	-4.54824	0.0857669	0.548236	0.261032
1h post exercise	HIIE	SUZ12	0.352579	13.6801	1.73078	-4.54836	0.0857807	0.548236	0.261032
1h post exercise	HIIE	CASP2	0.154154	13.2642	1.73054	-4.54872	0.0858188	0.548236	0.261032
1h post exercise	HIIE	RNF13	0.337636	15.6998	1.73039	-4.54897	0.08585	0.548236	0.261032
1h post exercise	HIIE	MTMR9	0.155216	14.2662	1.72938	-4.55057	0.0860279	0.548236	0.261032
1h post exercise	HIIE	SND1	0.10168	19.8972	1.72881	-4.55147	0.0861302	0.548236	0.261032
1h post exercise	HIIE	NOL11	0.59726	13.3975	1.72843	-4.55208	0.0862013	0.548236	0.261032
1h post exercise	HIIE	COPS3	0.165356	17.9204	1.72815	-4.55253	0.0862501	0.548236	0.261032
1h post exercise	MICE	SULT1A3	-0.397201	17.2904	-1.7281	-4.55261	0.0862615	0.548236	0.261032
1h post exercise	MICE	PDIA3	-0.24764	22.7924	-1.72804	-4.5527	0.0862722	0.548236	0.261032
1h post exercise	MICE	U2AF1	-0.396407	19.6072	-1.72763	-4.55335	0.0863455	0.548236	0.261032
1h post exercise	HIIE	FEZ2	0.321402	13.2224	1.7258	-4.55625	0.0866761	0.548236	0.261032
1h post exercise	HIIE	NENF	0.35313	14.7363	1.72535	-4.55696	0.0867566	0.548236	0.261032
1h post exercise	MICE	KPNA4	-0.174955	17.946	-1.7248	-4.55783	0.0868552	0.548236	0.261032
1h post exercise	HIIE	CYCS	0.155939	20.677	1.72426	-4.55867	0.0869504	0.548236	0.261032
1h post exercise	HIIE	SURF6	0.654363	13.0617	1.72379	-4.55942	0.0870387	0.548236	0.261032
1h post exercise	HIIE	ANPEP	0.454173	14.163	1.72308	-4.56054	0.0871669	0.548236	0.261032
1h post exercise	HIIE	SRGAP2	0.180026	14.1017	1.72251	-4.56144	0.0872676	0.548236	0.261032
1h post exercise	HIIE	PRMT3	0.258294	13.8012	1.72196	-4.56232	0.0873718	0.548236	0.261032
1h post exercise	HIIE	ASCC1	0.133113	14.4039	1.71987	-4.56561	0.087749	0.548236	0.261032
1h post exercise	HIIE	RANBP9	0.146943	14.4916	1.71908	-4.56686	0.0878932	0.548236	0.261032
1h post exercise	MICE	RAD9A	-0.326559	11.5156	-1.71904	-4.56692	0.0879018	0.548236	0.261032
1h post exercise	HIIE	MRPS26	0.361629	14.2535	1.71857	-4.56766	0.0879884	0.548236	0.261032
1h post exercise	MICE	DOK2	-0.214205	18.7322	-1.71734	-4.56961	0.0882147	0.548236	0.261032
1h post exercise	MICE	NEK7	-0.205982	17.184	-1.71726	-4.56973	0.0882294	0.548236	0.261032
1h post exercise	HIIE	VCP	0.0852598	21.6487	1.71677	-4.5705	0.0883158	0.548236	0.261032
1h post exercise	HIIE	RPLP2	0.325674	15.8081	1.7167	-4.57061	0.0883313	0.548236	0.261032
1h post exercise	HIIE	EIF2B5	0.153467	14.6816	1.71648	-4.57095	0.0883686	0.548236	0.261032
1h post exercise	HIIE	ESD	0.107514	19.543	1.71556	-4.5724	0.0885379	0.548236	0.261032
1h post exercise	HIIE	RAB31	0.230457	16.5043	1.71438	-4.57426	0.0887574	0.548236	0.261032
1h post exercise	HIIE	ATP11B	0.137559	16.635	1.71421	-4.57453	0.0887863	0.548236	0.261032
1h post exercise	MICE	ERO1B	-0.283959	15.0857	-1.71316	-4.57619	0.0889835	0.548236	0.261032
1h post exercise	HIIE	LRWD1	0.397201	14.096	1.71299	-4.57644	0.0890136	0.548236	0.261032
1h post exercise	HIIE	COX15	0.200161	14.0372	1.71279	-4.57676	0.0890486	0.548236	0.261032
1h post exercise	HIIE	EPB41L3	0.217484	15.0231	1.71223	-4.57765	0.0891547	0.548236	0.261032
1h post exercise	HIIE	ADD2	0.55389	13.6534	1.71202	-4.57797	0.0891934	0.548236	0.261032
1h post exercise	MICE	PDE5A	-0.323659	18.4802	-1.70894	-4.58281	0.0897641	0.548236	0.261032
1h post exercise	MICE	ARL15	-0.300529	15.1806	-1.70888	-4.5829	0.0897756	0.548236	0.261032
1h post exercise	HIIE	LPGAT1	0.213686	15.3637	1.70752	-4.58503	0.0900279	0.548236	0.261032
1h post exercise	HIIE	ARPC2	0.164646	21.8982	1.70729	-4.58538	0.0900677	0.548236	0.261032
1h post exercise	HIIE	CYTH1	0.177305	17.3383	1.70729	-4.58538	0.0900692	0.548236	0.261032
1h post exercise	MICE	KATNAL1	-0.30685	14.389	-1.70699	-4.58585	0.0901261	0.548236	0.261032
1h post exercise	HIIE	PYM1	0.15617	16.1081	1.70695	-4.58592	0.090132	0.548236	0.261032
1h post exercise	MICE	TUBB	-0.238086	21.1976	-1.70679	-4.58618	0.0901647	0.548236	0.261032
1h post exercise	HIIE	SLC12A6	0.18778	14.3617	1.70632	-4.5869	0.0902479	0.548236	0.261032
1h post exercise	HIIE	ARSB	0.286536	14.6236	1.70517	-4.58871	0.0904666	0.548236	0.261032
1h post exercise	HIIE	LCN2	0.924247	15.5085	1.70491	-4.58912	0.0905157	0.548236	0.261032
1h post exercise	HIIE	PSMD10	0.176921	15.2899	1.70424	-4.59016	0.0906379	0.548236	0.261032
1h post exercise	HIIE	IGLV1-47	0.304154	15.3317	1.70402	-4.5905	0.0906811	0.548236	0.261032
1h post exercise	HIIE	PIP4P1	0.177065	15.1071	1.70401	-4.59051	0.0906797	0.548236	0.261032
1h post exercise	MICE	IARS2	-0.149706	17.9012	-1.70315	-4.59186	0.0908414	0.548236	0.261032
1h post exercise	MICE	CHD7	-0.280305	13.4627	-1.70314	-4.59188	0.0908469	0.548236	0.261032
1h post exercise	MICE	DGKG	-0.240004	15.12	-1.70276	-4.59248	0.090918	0.548236	0.261032
1h post exercise	HIIE	CR1	0.399432	15.5997	1.70229	-4.59321	0.0910065	0.548236	0.261032
1h post exercise	MICE	FYTTD1	-0.308022	14.4681	-1.70225	-4.59328	0.0910143	0.548236	0.261032
1h post exercise	MICE	TNS1	-0.331315	16.1159	-1.70213	-4.59346	0.091037	0.548236	0.261032
1h post exercise	HIIE	PRKAA1	0.12734	17.4041	1.70178	-4.59401	0.0910996	0.548236	0.261032
1h post exercise	HIIE	PLA2G15	0.186635	15.1309	1.70057	-4.59589	0.0913272	0.548236	0.261032
1h post exercise	HIIE	NDUFA6	0.175563	16.6071	1.70054	-4.59594	0.091334	0.548236	0.261032
1h post exercise	HIIE	CAPZB	0.124411	22.1703	1.70038	-4.59618	0.0913619	0.548236	0.261032
1h post exercise	HIIE	HAGH	0.150268	17.6414	1.69994	-4.59688	0.091446	0.548236	0.261032
1h post exercise	HIIE	IRF3	0.235135	15.0259	1.69825	-4.59952	0.0917683	0.548236	0.261032
1h post exercise	MICE	WDFY3	-0.796149	10.9911	-1.69818	-4.59963	0.0917824	0.548236	0.261032
1h post exercise	HIIE	MRPL43	0.209312	15.5401	1.69754	-4.60062	0.0919022	0.548236	0.261032
1h post exercise	HIIE	PIK3CA	0.176422	13.8291	1.69738	-4.60086	0.0919297	0.548236	0.261032
1h post exercise	HIIE	SLC25A1	0.149713	17.8094	1.69733	-4.60094	0.0919385	0.548236	0.261032
1h post exercise	HIIE	FUNDC2	0.241173	14.5024	1.69733	-4.60095	0.0919426	0.548236	0.261032
1h post exercise	HIIE	RFT1	0.122922	15.993	1.69719	-4.60116	0.0919662	0.548236	0.261032
1h post exercise	MICE	EIF4E	-0.258003	16.2794	-1.69594	-4.60311	0.0922061	0.548236	0.261032
1h post exercise	HIIE	LYST	0.127493	12.9279	1.6953	-4.6041	0.0923247	0.548236	0.261032
1h post exercise	HIIE	RAB9B	0.486296	13.314	1.69468	-4.60507	0.0924454	0.548236	0.261032
1h post exercise	MICE	MFNG	-0.19307	13.8947	-1.69428	-4.60569	0.0925187	0.548236	0.261032
1h post exercise	HIIE	EPX	0.917654	12.831	1.69391	-4.60627	0.0925921	0.548236	0.261032
1h post exercise	HIIE	PRKD3	0.529351	12.2684	1.69335	-4.60714	0.0926985	0.548236	0.261032
1h post exercise	HIIE	MCM5	0.304843	15.4115	1.69317	-4.60742	0.0927329	0.548236	0.261032
1h post exercise	HIIE	RFLNB	0.248843	15.3902	1.69149	-4.61003	0.0930541	0.548236	0.261032
1h post exercise	HIIE	DNAJA4	0.209036	14.5435	1.69103	-4.61075	0.0931417	0.548236	0.261032
1h post exercise	HIIE	NOC2L	0.31483	13.4559	1.69044	-4.61166	0.0932551	0.548236	0.261032
1h post exercise	HIIE	RPN1	0.0896523	20.3789	1.68973	-4.61276	0.0933888	0.548236	0.261032
1h post exercise	MICE	TRNT1	-0.224521	15.0179	-1.68972	-4.61277	0.0933927	0.548236	0.261032
1h post exercise	MICE	YARS1	-0.283338	18.2704	-1.68954	-4.61306	0.0934281	0.548236	0.261032
1h post exercise	HIIE	TMEM167B	0.369529	14.135	1.68876	-4.61427	0.0935784	0.548236	0.261032
1h post exercise	MICE	IDH1	-0.191097	19.0461	-1.68875	-4.61429	0.0935803	0.548236	0.261032
1h post exercise	HIIE	TPT1	0.278151	16.5936	1.6886	-4.61451	0.0936084	0.548236	0.261032
1h post exercise	MICE	SCFD1	-0.239012	17.0386	-1.68809	-4.61531	0.0937071	0.548236	0.261032
1h post exercise	HIIE	GLIPR1	0.403396	13.4306	1.68651	-4.61775	0.0940114	0.548236	0.261032
1h post exercise	HIIE	CFP	0.723965	15.4931	1.68585	-4.61877	0.0941379	0.548236	0.261032
1h post exercise	HIIE	BANP	0.419612	13.7501	1.6858	-4.61886	0.0941489	0.548236	0.261032
1h post exercise	HIIE	OSBPL9	0.184244	14.4155	1.68539	-4.61948	0.0942244	0.548236	0.261032
1h post exercise	HIIE	WDR24	0.225887	13.0485	1.68506	-4.61999	0.0942879	0.548236	0.261032
1h post exercise	HIIE	CTNNA1	0.278753	13.6421	1.68481	-4.62038	0.0943393	0.548236	0.261032
1h post exercise	HIIE	MDH1	0.158857	21.6112	1.68372	-4.62206	0.0945476	0.548236	0.261032
1h post exercise	HIIE	DNAJC11	0.219231	15.7375	1.68359	-4.62228	0.0945768	0.548236	0.261032
1h post exercise	MICE	RBM15	-0.278241	14.9823	-1.68353	-4.62236	0.0945868	0.548236	0.261032
1h post exercise	HIIE	MED20	0.314266	13.1734	1.68292	-4.62331	0.0947068	0.548236	0.261032
1h post exercise	MICE	TRABD	-0.168025	15.107	-1.6829	-4.62333	0.0947062	0.548236	0.261032
1h post exercise	HIIE	FBXO38	0.399643	11.977	1.68288	-4.62336	0.0947132	0.548236	0.261032
1h post exercise	MICE	SLFN11	-0.336226	14.7937	-1.68214	-4.62451	0.094858	0.548236	0.261032
1h post exercise	MICE	IER3IP1	-0.529713	17.4748	-1.68139	-4.62566	0.0950025	0.548236	0.261032
1h post exercise	HIIE	MEF2C	0.453141	12.2609	1.68026	-4.62741	0.095223	0.548236	0.261032
1h post exercise	HIIE	STX18	0.13419	14.8284	1.68016	-4.62756	0.0952398	0.548236	0.261032
1h post exercise	HIIE	COX7A2	0.217174	20.5977	1.68003	-4.62777	0.095269	0.548236	0.261032
1h post exercise	MICE	DDX55	-0.279906	13.1762	-1.6797	-4.62828	0.0953329	0.548236	0.261032
1h post exercise	HIIE	WASHC2C	0.688308	14.1289	1.67959	-4.62845	0.0953545	0.548236	0.261032
1h post exercise	HIIE	ABHD13	0.255299	14.4193	1.67882	-4.62963	0.0955041	0.548236	0.261032
1h post exercise	HIIE	XK	0.279974	14.6971	1.67879	-4.62969	0.0955112	0.548236	0.261032
1h post exercise	MICE	PBLD	-0.374321	13.2256	-1.67849	-4.63014	0.0955687	0.548236	0.261032
1h post exercise	HIIE	NGLY1	0.145193	15.6226	1.67811	-4.63072	0.0956401	0.548236	0.261032
1h post exercise	HIIE	LRRC8C	0.190608	15.1975	1.67679	-4.63276	0.0958999	0.548236	0.261032
1h post exercise	HIIE	MRPS16	0.293805	18.7744	1.67625	-4.6336	0.0960083	0.548236	0.261032
1h post exercise	HIIE	TOMM40L	0.216011	14.7945	1.67611	-4.6338	0.0960348	0.548236	0.261032
1h post exercise	HIIE	FSCN1	0.199343	15.4052	1.67588	-4.63415	0.0960795	0.548236	0.261032
1h post exercise	HIIE	FAM136A	0.311581	14.0256	1.67515	-4.63528	0.0962232	0.548236	0.261032
1h post exercise	HIIE	EML3	0.0982264	16.9075	1.67475	-4.63589	0.0962982	0.548236	0.261032
1h post exercise	MICE	PBXIP1	-0.24135	19.3974	-1.67438	-4.63647	0.0963759	0.548236	0.261032
1h post exercise	HIIE	GDI2	0.12205	19.8527	1.67436	-4.63649	0.0963751	0.548236	0.261032
1h post exercise	HIIE	PPP3CC	0.163615	14.6744	1.67413	-4.63685	0.0964214	0.548236	0.261032
1h post exercise	HIIE	PPIP5K2	0.122622	15.849	1.674	-4.63704	0.0964462	0.548236	0.261032
1h post exercise	HIIE	USP48	0.278694	13.9038	1.67311	-4.63843	0.0966261	0.548236	0.261032
1h post exercise	MICE	ANKRD28	-0.184945	14.3414	-1.67302	-4.63855	0.0966394	0.548236	0.261032
1h post exercise	HIIE	ODR4	0.149283	14.7561	1.67262	-4.63916	0.0967185	0.548236	0.261032
1h post exercise	HIIE	SLC12A9	0.157681	14.6859	1.67191	-4.64025	0.0968583	0.548236	0.261032
1h post exercise	HIIE	EXOC6	0.184102	13.5909	1.67158	-4.64076	0.0969237	0.548236	0.261032
1h post exercise	HIIE	CERS6	0.203526	11.4975	1.6713	-4.6412	0.0969801	0.548236	0.261032
1h post exercise	HIIE	FAM91A1	0.134279	15.0603	1.67127	-4.64124	0.0969862	0.548236	0.261032
1h post exercise	HIIE	TPM3	0.249754	21.6733	1.67107	-4.64156	0.0970288	0.548236	0.261032
1h post exercise	MICE	FOLR3	-0.442646	13.3935	-1.67042	-4.64255	0.0971571	0.548236	0.261032
1h post exercise	MICE	ZFPM1	-0.401031	13.0047	-1.67031	-4.64272	0.0971788	0.548236	0.261032
1h post exercise	MICE	ERN1	-0.213407	18.4308	-1.67015	-4.64296	0.0972099	0.548236	0.261032
1h post exercise	HIIE	IGFBP6	0.366742	13.1587	1.67006	-4.6431	0.0972287	0.548236	0.261032
1h post exercise	MICE	IL4I1	-0.329313	14.2016	-1.66989	-4.64337	0.0972631	0.548236	0.261032
1h post exercise	HIIE	HK2	0.208706	16.4892	1.66976	-4.64357	0.0972886	0.548236	0.261032
1h post exercise	MICE	RRS1	-0.318495	14.8475	-1.66944	-4.64406	0.0973525	0.548236	0.261032
1h post exercise	HIIE	AZU1	0.601269	18.7983	1.66915	-4.6445	0.0974098	0.548236	0.261032
1h post exercise	MICE	ATP5PO	-0.304968	19.1179	-1.66772	-4.64669	0.0976931	0.548613	0.260734
1h post exercise	MICE	ACAA1	-0.284048	16.5354	-1.66767	-4.64677	0.0977043	0.548613	0.260734
1h post exercise	MICE	GIPC3	-0.313654	16.1311	-1.6673	-4.64734	0.0977778	0.548613	0.260734
1h post exercise	MICE	KPNA3	-0.232084	16.131	-1.66628	-4.6489	0.0979806	0.548613	0.260734
1h post exercise	HIIE	NIT1	0.143398	17.4957	1.66625	-4.64894	0.0979839	0.548613	0.260734
1h post exercise	MICE	SERPINH1	-0.230367	16.5209	-1.66607	-4.64921	0.0980217	0.548613	0.260734
1h post exercise	HIIE	TNFSF13	0.262888	13.4828	1.66487	-4.65106	0.0982628	0.549351	0.26015
1h post exercise	HIIE	BCS1L	0.120299	15.0619	1.66433	-4.65186	0.0983659	0.549351	0.26015
1h post exercise	MICE	DDX24	-0.245534	14.7543	-1.66405	-4.65231	0.0984265	0.549351	0.26015
1h post exercise	HIIE	PPP1CC	0.154586	19.8744	1.66308	-4.65379	0.0986184	0.549914	0.259706
1h post exercise	HIIE	ATP6AP1	0.22881	16.3078	1.6617	-4.6559	0.0988981	0.55079	0.259014
1h post exercise	MICE	AP3S1	-0.159888	15.5324	-1.66138	-4.65637	0.098958	0.55079	0.259014
1h post exercise	HIIE	LACTB	0.141129	16.1267	1.66053	-4.65767	0.099129	0.551234	0.258664
1h post exercise	MICE	WIPF1	-0.241488	19.2561	-1.66007	-4.65838	0.0992258	0.551244	0.258656
1h post exercise	MICE	TUBB4A	-0.888272	16.2546	-1.65963	-4.65905	0.0993134	0.551244	0.258656
1h post exercise	HIIE	CYB5B	0.172212	17.0063	1.65771	-4.66198	0.0997013	0.552347	0.257788
1h post exercise	HIIE	ASAH1	0.283727	18.4285	1.65749	-4.66232	0.0997473	0.552347	0.257788
1h post exercise	MICE	TIMMDC1	-0.350707	11.603	-1.65697	-4.6631	0.0998518	0.552347	0.257788
1h post exercise	HIIE	SCP2	0.15477	17.0465	1.65682	-4.66332	0.099878	0.552347	0.257788
1h post exercise	HIIE	UQCC1	0.239503	14.869	1.65593	-4.66468	0.100062	0.55286	0.257385
1h post exercise	HIIE	STK11IP	0.177723	13.985	1.65491	-4.66623	0.100266	0.553477	0.2569
1h post exercise	HIIE	ARRB1	0.124644	19.1316	1.65367	-4.66812	0.10052	0.554372	0.256199
1h post exercise	HIIE	TMEM30A	0.244931	17.956	1.65204	-4.67059	0.100854	0.555368	0.255419
1h post exercise	MICE	DCTN5	-0.138915	15.1993	-1.65164	-4.67119	0.100932	0.555368	0.255419
1h post exercise	HIIE	PEDS1	0.17423	13.8075	1.65141	-4.67155	0.10098	0.555368	0.255419
1h post exercise	HIIE	VNN2	0.528862	13.6838	1.65036	-4.67315	0.101199	0.555368	0.255419
1h post exercise	HIIE	PSMD1	0.112619	17.4936	1.64975	-4.67407	0.10132	0.555368	0.255419
1h post exercise	HIIE	EXOSC7	0.269655	14.7568	1.64927	-4.67481	0.101422	0.555368	0.255419
1h post exercise	HIIE	TRAPPC6B	0.145686	15.5348	1.64925	-4.67482	0.101421	0.555368	0.255419
1h post exercise	HIIE	DTNBP1	0.270441	17.0918	1.64876	-4.67558	0.101527	0.555368	0.255419
1h post exercise	HIIE	THG1L	0.348612	13.9173	1.64875	-4.67559	0.101528	0.555368	0.255419
1h post exercise	HIIE	SP1	0.361396	12.9911	1.64746	-4.67754	0.101793	0.555533	0.25529
1h post exercise	MICE	SCAMP2	-0.307477	17.5993	-1.64706	-4.67814	0.101875	0.555533	0.25529
1h post exercise	HIIE	DNAJC7	0.0916911	15.4334	1.6459	-4.6799	0.102112	0.555533	0.25529
1h post exercise	HIIE	MEST	0.218258	14.1508	1.64589	-4.67992	0.102116	0.555533	0.25529
1h post exercise	MICE	PIGU	-0.24135	14.4872	-1.6457	-4.6802	0.102155	0.555533	0.25529
1h post exercise	MICE	CDK2	-0.185608	14.7556	-1.64566	-4.68026	0.102161	0.555533	0.25529
1h post exercise	HIIE	SPI1	0.329814	14.522	1.64548	-4.68054	0.102202	0.555533	0.25529
1h post exercise	HIIE	AP2M1	0.114204	18.9128	1.64411	-4.6826	0.10248	0.556314	0.25468
1h post exercise	HIIE	PSMB8	0.138926	19.1354	1.64325	-4.6839	0.102659	0.556314	0.25468
1h post exercise	HIIE	BRAF	0.0986771	16.0033	1.64229	-4.68534	0.102857	0.556314	0.25468
1h post exercise	HIIE	ALOX5	0.355626	15.8766	1.64171	-4.68623	0.102981	0.556314	0.25468
1h post exercise	HIIE	ELP6	0.191543	14.2366	1.6414	-4.6867	0.103043	0.556314	0.25468
1h post exercise	HIIE	PPP2R2A	0.100113	17.4021	1.64131	-4.68684	0.103062	0.556314	0.25468
1h post exercise	MICE	MRRF	-0.188445	15.9979	-1.64055	-4.68799	0.103223	0.556314	0.25468
1h post exercise	HIIE	ITGAV	0.2777	15.6732	1.63973	-4.68921	0.103393	0.556314	0.25468
1h post exercise	HIIE	TGM2	0.513815	14.1055	1.63933	-4.68982	0.103476	0.556314	0.25468
1h post exercise	HIIE	LAMA2	1.27127	14.5531	1.63931	-4.68985	0.103481	0.556314	0.25468
1h post exercise	MICE	AARS2	-0.118235	15.2278	-1.63913	-4.69011	0.103514	0.556314	0.25468
1h post exercise	MICE	MX1	-0.291087	16.5388	-1.63897	-4.69036	0.103552	0.556314	0.25468
1h post exercise	HIIE	MYCBP2	0.0770524	15.8003	1.63843	-4.69117	0.103661	0.556314	0.25468
1h post exercise	HIIE	NCEH1	0.146602	15.8315	1.63841	-4.69121	0.103666	0.556314	0.25468
1h post exercise	HIIE	METTL16	0.436637	14.2955	1.63813	-4.69163	0.103727	0.556314	0.25468
1h post exercise	HIIE	MAPK1	0.0949417	18.8539	1.63609	-4.6947	0.104151	0.558092	0.253294
1h post exercise	HIIE	CD6	0.375084	12.9443	1.63514	-4.69612	0.104353	0.558675	0.25284
1h post exercise	HIIE	ZMYND11	0.408979	13.5665	1.63421	-4.69753	0.104549	0.558785	0.252755
1h post exercise	MICE	TOR2A	-0.362821	14.4266	-1.63384	-4.69808	0.104627	0.558785	0.252755
1h post exercise	MICE	NPEPPS	-0.178907	19.1559	-1.63372	-4.69825	0.104651	0.558785	0.252755
1h post exercise	MICE	OXA1L	-0.212691	14.6883	-1.63297	-4.69938	0.104809	0.559137	0.252482
1h post exercise	MICE	PTPN12	-0.224763	18.2589	-1.63182	-4.70112	0.105053	0.559941	0.251858
1h post exercise	MICE	HNRNPH2	-0.414301	16.5409	-1.63091	-4.70248	0.105244	0.560469	0.251449
1h post exercise	HIIE	RPS17	0.27586	16.332	1.63023	-4.7035	0.105388	0.560738	0.25124
1h post exercise	HIIE	MDP1	0.269711	15.5005	1.62891	-4.70548	0.105668	0.561733	0.25047
1h post exercise	MICE	CEP170	-0.263125	12.9906	-1.62794	-4.70692	0.105872	0.562322	0.250015
1h post exercise	HIIE	NADK2	0.126929	15.7768	1.62533	-4.71082	0.106425	0.564481	0.24835
1h post exercise	HIIE	TSPAN4	0.305944	14.3698	1.62516	-4.71109	0.106465	0.564481	0.24835
1h post exercise	HIIE	HSD17B11	0.129717	16.7856	1.62395	-4.71288	0.106719	0.565147	0.247839
1h post exercise	HIIE	PLD3	0.287323	17.3297	1.62347	-4.71361	0.106826	0.565147	0.247839
1h post exercise	HIIE	VAMP4	0.261996	12.9548	1.62287	-4.7145	0.106954	0.565147	0.247839
1h post exercise	MICE	CD79B	-0.454764	13.9026	-1.62282	-4.71458	0.106965	0.565147	0.247839
1h post exercise	HIIE	ACY1	0.17752	20.6842	1.6223	-4.71535	0.107075	0.565235	0.247771
1h post exercise	HIIE	SLCO3A1	0.196815	11.6613	1.62166	-4.71631	0.107211	0.565454	0.247603
1h post exercise	MICE	GMPS	-0.14628	17.3146	-1.61968	-4.71926	0.107636	0.566506	0.246795
1h post exercise	MICE	ILK	-0.375872	21.6998	-1.61923	-4.71994	0.107737	0.566506	0.246795
1h post exercise	HIIE	PSMB6	0.152089	17.8663	1.61916	-4.72003	0.107747	0.566506	0.246795
1h post exercise	HIIE	DIS3L2	0.127534	14.3112	1.61898	-4.72029	0.107785	0.566506	0.246795
1h post exercise	HIIE	PARP12	0.158834	12.6908	1.61745	-4.72258	0.108117	0.567754	0.24584
1h post exercise	HIIE	GOLPH3L	0.352075	14.8727	1.61681	-4.72353	0.108258	0.568003	0.24565
1h post exercise	HIIE	PIN1	0.205267	16.0879	1.61559	-4.72534	0.108521	0.568888	0.244973
1h post exercise	HIIE	HYPK	0.382029	13.9132	1.61465	-4.72674	0.108726	0.568915	0.244953
1h post exercise	HIIE	BPNT1	0.112108	16.6001	1.61462	-4.72677	0.108728	0.568915	0.244953
1h post exercise	MICE	COX6A1	-0.77358	15.7539	-1.61417	-4.72746	0.10883	0.568915	0.244953
1h post exercise	HIIE	MLEC	0.144005	19.5399	1.61382	-4.72797	0.108903	0.568915	0.244953
1h post exercise	MICE	CDK19	-0.145011	13.2512	-1.61222	-4.73034	0.109249	0.570231	0.243949
1h post exercise	HIIE	CLPX	0.297415	13.575	1.61108	-4.73204	0.109502	0.570338	0.243868
1h post exercise	HIIE	TMEM43	0.176819	19.2313	1.61071	-4.73258	0.109583	0.570338	0.243868
1h post exercise	MICE	ARG2	-0.264613	14.4435	-1.61044	-4.73298	0.109642	0.570338	0.243868
1h post exercise	HIIE	SSBP1	0.180742	19.3982	1.60966	-4.73414	0.109813	0.570338	0.243868
1h post exercise	HIIE	NMI	0.169901	15.9601	1.60959	-4.73424	0.109826	0.570338	0.243868
1h post exercise	HIIE	TMEM33	0.170518	18.8109	1.60955	-4.7343	0.109837	0.570338	0.243868
1h post exercise	MICE	DOCK9	-0.386984	15.7238	-1.60738	-4.73751	0.110311	0.570486	0.243755
1h post exercise	MICE	ITPA	-0.214699	15.274	-1.60708	-4.73795	0.110377	0.570486	0.243755
1h post exercise	HIIE	ABRACL	0.43694	18.2605	1.60704	-4.73802	0.110387	0.570486	0.243755
1h post exercise	HIIE	VDAC2	0.270947	21.335	1.60639	-4.73897	0.110528	0.570486	0.243755
1h post exercise	HIIE	ACP3	0.308875	13.609	1.60602	-4.73952	0.110609	0.570486	0.243755
1h post exercise	HIIE	ZC3HAV1	0.117795	16.5762	1.60593	-4.73966	0.110628	0.570486	0.243755
1h post exercise	MICE	ERBIN	-0.329054	16.9722	-1.60582	-4.73982	0.110655	0.570486	0.243755
1h post exercise	MICE	PTPN6	-0.0988258	20.2717	-1.60537	-4.74048	0.11075	0.570486	0.243755
1h post exercise	MICE	RASA3	-0.253468	19.3855	-1.60533	-4.74054	0.110762	0.570486	0.243755
1h post exercise	HIIE	CCNL1	0.513983	13.0633	1.60511	-4.74086	0.11081	0.570486	0.243755
1h post exercise	HIIE	PTER	0.226142	16.1527	1.60467	-4.74152	0.110908	0.570504	0.243741
1h post exercise	MICE	PRKAB2	-0.318534	12.7513	-1.60267	-4.74447	0.111349	0.571343	0.243103
1h post exercise	HIIE	PRKCSH	0.252364	15.3984	1.60176	-4.74581	0.111551	0.571343	0.243103
1h post exercise	MICE	SHPK	-0.287143	15.5278	-1.60164	-4.74599	0.111578	0.571343	0.243103
1h post exercise	HIIE	RAB35	0.138203	16.0961	1.60141	-4.74632	0.111624	0.571343	0.243103
1h post exercise	HIIE	GLG1	0.381729	16.6822	1.60082	-4.74719	0.111758	0.571343	0.243103
1h post exercise	MICE	GUK1	-0.15467	15.8941	-1.60033	-4.74791	0.111864	0.571343	0.243103
1h post exercise	MICE	SLC25A32	-0.231146	12.1385	-1.59956	-4.74904	0.112034	0.571343	0.243103
1h post exercise	MICE	USP5	-0.137276	18.4008	-1.59955	-4.74905	0.112036	0.571343	0.243103
1h post exercise	MICE	FAU	-0.409319	17.3003	-1.59923	-4.74953	0.112111	0.571343	0.243103
1h post exercise	HIIE	BIRC6	0.106845	14.4964	1.59871	-4.7503	0.112225	0.571343	0.243103
1h post exercise	HIIE	SURF1	0.162872	16.5325	1.59809	-4.75121	0.112363	0.571343	0.243103
1h post exercise	HIIE	BCL11A	0.443216	11.5527	1.59764	-4.75188	0.112466	0.571343	0.243103
1h post exercise	HIIE	INPP5K	0.137906	15.5118	1.59744	-4.75216	0.112506	0.571343	0.243103
1h post exercise	MICE	UQCRC1	-0.178725	19.9901	-1.59714	-4.75261	0.112577	0.571343	0.243103
1h post exercise	HIIE	REEP5	0.161588	15.3057	1.59704	-4.75275	0.112596	0.571343	0.243103
1h post exercise	HIIE	CARD9	0.183018	13.9369	1.59635	-4.75377	0.11275	0.571343	0.243103
1h post exercise	HIIE	TMEM205	0.284386	16.8159	1.59596	-4.75434	0.11284	0.571343	0.243103
1h post exercise	HIIE	MAP4K1	0.264939	14.1396	1.5953	-4.7553	0.112987	0.571343	0.243103
1h post exercise	MICE	API5	-0.25799	15.6797	-1.59461	-4.75633	0.113143	0.571343	0.243103
1h post exercise	HIIE	SLC18A2	0.224475	16.22	1.59395	-4.75729	0.113289	0.571343	0.243103
1h post exercise	HIIE	GOLGA4	0.213142	13.6811	1.59327	-4.75829	0.11344	0.571343	0.243103
1h post exercise	MICE	CDKAL1	-0.311252	14.716	-1.59304	-4.75863	0.113495	0.571343	0.243103
1h post exercise	HIIE	CSTF1	0.313766	14.7162	1.59295	-4.75875	0.113513	0.571343	0.243103
1h post exercise	MICE	EMC4	-0.306577	16.1731	-1.59257	-4.75932	0.1136	0.571343	0.243103
1h post exercise	MICE	FERMT3	-0.230274	24.1951	-1.59254	-4.75936	0.113606	0.571343	0.243103
1h post exercise	HIIE	RALGAPA1	0.139369	13.7165	1.59232	-4.75967	0.113652	0.571343	0.243103
1h post exercise	MICE	DFFB	-0.359111	11.7383	-1.59212	-4.75997	0.113701	0.571343	0.243103
1h post exercise	HIIE	GPD2	0.180465	20.588	1.59193	-4.76024	0.113742	0.571343	0.243103
1h post exercise	HIIE	MRPL16	0.193136	15.054	1.59113	-4.76142	0.113923	0.571343	0.243103
1h post exercise	HIIE	CD5L	0.451258	12.4824	1.59038	-4.76253	0.114093	0.571343	0.243103
1h post exercise	HIIE	TMT1A	0.21691	18.9621	1.59021	-4.76277	0.11413	0.571343	0.243103
1h post exercise	MICE	STAT4	-0.323964	13.3417	-1.59005	-4.763	0.114166	0.571343	0.243103
1h post exercise	HIIE	PGLYRP2	0.252752	14.8943	1.58993	-4.76317	0.114193	0.571343	0.243103
1h post exercise	HIIE	UBA52	0.456823	10.0771	1.58928	-4.76413	0.11434	0.571523	0.242966
1h post exercise	MICE	STAT5A	-0.10823	18.1454	-1.58892	-4.76465	0.114418	0.571523	0.242966
1h post exercise	HIIE	CAT	0.1757	20.29	1.58811	-4.76584	0.114605	0.571563	0.242936
1h post exercise	HIIE	HDHD3	0.158184	16.9951	1.58747	-4.76678	0.114748	0.571563	0.242936
1h post exercise	HIIE	CTSS	0.368782	18.5684	1.58586	-4.76913	0.115115	0.571563	0.242936
1h post exercise	MICE	PATL1	-0.185665	15.2819	-1.58573	-4.76931	0.115143	0.571563	0.242936
1h post exercise	HIIE	TMIGD2	0.309587	14.1938	1.58535	-4.76987	0.115231	0.571563	0.242936
1h post exercise	HIIE	SERINC3	0.368724	15.0811	1.58517	-4.77014	0.115272	0.571563	0.242936
1h post exercise	HIIE	MPV17	0.394076	14.6181	1.58436	-4.77132	0.115456	0.571563	0.242936
1h post exercise	HIIE	CD36	0.285033	20.5672	1.58431	-4.77139	0.115467	0.571563	0.242936
1h post exercise	MICE	TMEM40	-0.275597	16.3996	-1.58422	-4.77151	0.115486	0.571563	0.242936
1h post exercise	HIIE	RNASE2	0.35583	17.9557	1.58379	-4.77215	0.115586	0.571563	0.242936
1h post exercise	MICE	ATP5F1A	-0.174062	22.9795	-1.58367	-4.77232	0.115611	0.571563	0.242936
1h post exercise	HIIE	MRPS33	0.269057	13.9801	1.58366	-4.77233	0.115615	0.571563	0.242936
1h post exercise	HIIE	ANAPC4	0.176624	13.2024	1.58346	-4.77262	0.115657	0.571563	0.242936
1h post exercise	MICE	ARHGAP1	-0.186997	19.7034	-1.58099	-4.77623	0.116226	0.573906	0.24116
1h post exercise	HIIE	TESC	0.243694	15.4815	1.58052	-4.77691	0.116333	0.573966	0.241114
1h post exercise	MICE	SULT1A1	-0.363453	18.3179	-1.57997	-4.77771	0.116459	0.574118	0.240999
1h post exercise	HIIE	NDUFV1	0.174222	18.5213	1.57934	-4.77862	0.116602	0.574357	0.240818
1h post exercise	HIIE	ADH5	0.112153	19.4379	1.57792	-4.78068	0.116924	0.575015	0.240321
1h post exercise	MICE	SFXN1	-0.149308	18.6626	-1.57792	-4.78069	0.116926	0.575015	0.240321
1h post exercise	HIIE	WDR43	0.418062	15.5296	1.5764	-4.78289	0.117278	0.576276	0.23937
1h post exercise	MICE	ACTG2	-0.378699	20.361	-1.57537	-4.7844	0.117517	0.576978	0.238841
1h post exercise	HIIE	C6orf120	0.266956	13.636	1.57305	-4.78775	0.118052	0.579135	0.23722
1h post exercise	HIIE	AIP	0.147619	15.2963	1.57244	-4.78863	0.118189	0.579211	0.237163
1h post exercise	HIIE	LGALS8	0.187657	15.3241	1.57216	-4.78905	0.118259	0.579211	0.237163
1h post exercise	HIIE	IDH3G	0.128068	17.3724	1.57137	-4.79018	0.118438	0.579428	0.237001
1h post exercise	MICE	SMAD2	-0.167364	17.209	-1.57095	-4.7908	0.11854	0.579428	0.237001
1h post exercise	HIIE	GPI	0.142213	19.9077	1.57071	-4.79113	0.118591	0.579428	0.237001
1h post exercise	MICE	EIF4A2	-0.136781	17.9161	-1.56946	-4.79294	0.118882	0.580158	0.236454
1h post exercise	HIIE	FBXO22	0.161865	14.6506	1.56898	-4.79364	0.118995	0.580158	0.236454
1h post exercise	HIIE	GGACT	0.151545	15.4813	1.56883	-4.79385	0.119029	0.580158	0.236454
1h post exercise	MICE	IFITM2	-0.480144	15.9676	-1.5681	-4.79491	0.119202	0.580224	0.236404
1h post exercise	MICE	NDUFA3	-0.412142	15.9091	-1.56796	-4.79511	0.119235	0.580224	0.236404
1h post exercise	HIIE	PECAM1	0.187427	20.3928	1.56668	-4.79696	0.119534	0.581214	0.235664
1h post exercise	MICE	TAMM41	-0.175654	15.3686	-1.56603	-4.7979	0.119686	0.58126	0.235629
1h post exercise	HIIE	CD5	0.312411	16.6174	1.56582	-4.7982	0.119736	0.58126	0.235629
1h post exercise	HIIE	STUB1	0.146995	15.642	1.5646	-4.79995	0.120018	0.581297	0.235602
1h post exercise	MICE	TARDBP	-0.188464	16.3657	-1.56444	-4.80018	0.120059	0.581297	0.235602
1h post exercise	MICE	ALG6	-0.30425	14.1907	-1.56399	-4.80083	0.120165	0.581297	0.235602
1h post exercise	HIIE	ITGB2	0.352988	18.9066	1.56381	-4.8011	0.120208	0.581297	0.235602
1h post exercise	HIIE	RMND1	0.158349	14.3684	1.56314	-4.80205	0.120361	0.581297	0.235602
1h post exercise	HIIE	FIS1	0.208086	18.1499	1.56294	-4.80235	0.120412	0.581297	0.235602
1h post exercise	HIIE	TOLLIP	0.146371	17.2536	1.56255	-4.80291	0.120501	0.581297	0.235602
1h post exercise	HIIE	MAEA	0.135773	14.7134	1.56249	-4.80299	0.120514	0.581297	0.235602
1h post exercise	HIIE	SDF2L1	0.166973	17.0415	1.56202	-4.80367	0.120628	0.581384	0.235537
1h post exercise	MICE	SEC23IP	-0.132872	16.3805	-1.56159	-4.80429	0.120727	0.581397	0.235527
1h post exercise	HIIE	GTF3C5	0.141182	14.5807	1.56056	-4.80577	0.12097	0.582101	0.235002
1h post exercise	HIIE	SPR	0.197893	14.5421	1.55973	-4.80696	0.121168	0.582168	0.234952
1h post exercise	HIIE	LGALS1	0.258213	18.6862	1.55904	-4.80795	0.121332	0.582168	0.234952
1h post exercise	HIIE	MFF	0.224183	15.9357	1.55863	-4.80855	0.12143	0.582168	0.234952
1h post exercise	MICE	ARL6IP5	-0.34509	20.8327	-1.55849	-4.80875	0.121463	0.582168	0.234952
1h post exercise	MICE	CCT8	-0.154275	20.1224	-1.55847	-4.80877	0.121466	0.582168	0.234952
1h post exercise	HIIE	DDX52	0.348291	12.3224	1.55772	-4.80985	0.121645	0.582318	0.23484
1h post exercise	MICE	CYB5R1	-0.160361	18.752	-1.55753	-4.81013	0.12169	0.582318	0.23484
1h post exercise	HIIE	TKT	0.237245	21.0003	1.55649	-4.81161	0.121936	0.582337	0.234825
1h post exercise	MICE	MAP7D1	-0.238586	14.2186	-1.55616	-4.81208	0.122014	0.582337	0.234825
1h post exercise	HIIE	METTL9	0.255559	14.556	1.5555	-4.81303	0.122172	0.582337	0.234825
1h post exercise	HIIE	HOOK3	0.195826	13.8164	1.5555	-4.81303	0.122169	0.582337	0.234825
1h post exercise	HIIE	ALS2	0.146993	13.9105	1.55537	-4.81321	0.1222	0.582337	0.234825
1h post exercise	HIIE	PBDC1	0.125078	16.102	1.55464	-4.81426	0.122374	0.582337	0.234825
1h post exercise	HIIE	GALNT4	0.168277	14.8822	1.5544	-4.8146	0.12243	0.582337	0.234825
1h post exercise	HIIE	FAAH	0.472287	13.6875	1.55394	-4.81527	0.122545	0.582337	0.234825
1h post exercise	MICE	ATPAF2	-0.20453	13.8473	-1.5533	-4.81618	0.122694	0.582337	0.234825
1h post exercise	HIIE	ANAPC2	0.178091	12.4365	1.55267	-4.81708	0.122843	0.582337	0.234825
1h post exercise	HIIE	MCCC1	0.110141	15.9876	1.55244	-4.81741	0.122898	0.582337	0.234825
1h post exercise	HIIE	ZCCHC3	0.24726	12.7688	1.55232	-4.81758	0.122928	0.582337	0.234825
1h post exercise	MICE	FASN	-0.14255	18.0582	-1.55205	-4.81797	0.122993	0.582337	0.234825
1h post exercise	HIIE	IL18	0.21952	15.4714	1.55185	-4.81826	0.123044	0.582337	0.234825
1h post exercise	HIIE	HMSD	0.235872	11.836	1.55017	-4.82066	0.123444	0.582458	0.234735
1h post exercise	MICE	RAB9A	-0.154078	15.8686	-1.55005	-4.82083	0.123473	0.582458	0.234735
1h post exercise	HIIE	ZFYVE27	0.273904	12.7444	1.54993	-4.821	0.123505	0.582458	0.234735
1h post exercise	HIIE	FAM3C	0.23339	15.6595	1.54955	-4.82154	0.123595	0.582458	0.234735
1h post exercise	HIIE	PICALM	0.115067	17.4764	1.54934	-4.82184	0.123643	0.582458	0.234735
1h post exercise	HIIE	RRAGA	0.140342	16.503	1.5489	-4.82247	0.123748	0.582458	0.234735
1h post exercise	HIIE	LRP1	0.330543	14.1227	1.54858	-4.82293	0.123828	0.582458	0.234735
1h post exercise	MICE	ME3	-0.296681	12.9471	-1.54847	-4.82308	0.123854	0.582458	0.234735
1h post exercise	HIIE	PPP3R1	0.353948	15.1588	1.54812	-4.82357	0.123937	0.582458	0.234735
1h post exercise	MICE	KMT2C	-0.390753	11.5816	-1.5467	-4.82561	0.124282	0.583621	0.233869
1h post exercise	HIIE	CDA	0.46351	14.4738	1.54599	-4.82662	0.124453	0.583972	0.233608
1h post exercise	MICE	WDR75	-0.493171	12.6862	-1.54452	-4.82871	0.124808	0.585182	0.232709
1h post exercise	HIIE	RPL10A	0.323068	18.7779	1.54405	-4.82938	0.124921	0.585258	0.232653
1h post exercise	HIIE	SREK1	0.246871	13.8675	1.54313	-4.83068	0.125143	0.585844	0.232218
1h post exercise	HIIE	ACP2	0.123448	17.5401	1.54122	-4.8334	0.125605	0.587288	0.231149
1h post exercise	HIIE	HS2ST1	0.150182	15.357	1.54105	-4.83364	0.125646	0.587288	0.231149
1h post exercise	MICE	EIF5	-0.13437	16.4309	-1.54058	-4.8343	0.12576	0.587364	0.231092
1h post exercise	HIIE	KRIT1	0.285632	13.2644	1.53894	-4.83664	0.126164	0.588799	0.230033
1h post exercise	HIIE	ICAM3	0.284531	17.4704	1.53824	-4.83763	0.126334	0.589136	0.229784
1h post exercise	HIIE	RAE1	0.187777	15.3876	1.53637	-4.84028	0.126792	0.590816	0.228548
1h post exercise	MICE	DPM1	-0.0959648	18.2779	-1.53567	-4.84127	0.12696	0.591144	0.228307
1h post exercise	HIIE	RETN	0.546081	15.1351	1.53441	-4.84305	0.127274	0.591847	0.227791
1h post exercise	HIIE	CLASP1	0.153881	15.1479	1.53407	-4.84353	0.127353	0.591847	0.227791
1h post exercise	MICE	UQCRC2	-0.20038	17.8343	-1.53375	-4.84398	0.127435	0.591847	0.227791
1h post exercise	MICE	PARVB	-0.273203	22.1574	-1.53259	-4.84563	0.127722	0.591847	0.227791
1h post exercise	HIIE	EP300	0.254826	13.5451	1.53221	-4.84615	0.127814	0.591847	0.227791
1h post exercise	HIIE	ARRB2	0.248648	15.5158	1.53162	-4.847	0.127962	0.591847	0.227791
1h post exercise	HIIE	ARMC6	0.22611	14.2649	1.53157	-4.84707	0.127973	0.591847	0.227791
1h post exercise	HIIE	EIF2A	0.0955702	16.7005	1.53091	-4.84799	0.128131	0.591847	0.227791
1h post exercise	MICE	PSIP1	-0.220491	17.2262	-1.53087	-4.84805	0.128145	0.591847	0.227791
1h post exercise	HIIE	COG5	0.250764	13.5637	1.53073	-4.84825	0.12818	0.591847	0.227791
1h post exercise	HIIE	IRF4	0.289504	12.4516	1.53069	-4.8483	0.128189	0.591847	0.227791
1h post exercise	MICE	PDXDC1	-0.220852	14.9599	-1.52992	-4.84939	0.128381	0.592278	0.227475
1h post exercise	HIIE	NDUFB7	0.228837	17.2262	1.52928	-4.85029	0.128539	0.592556	0.227271
1h post exercise	MICE	PDCD6IP	-0.235218	18.805	-1.52835	-4.8516	0.128769	0.59316	0.226828
1h post exercise	MICE	CCT7	-0.100665	19.262	-1.52603	-4.85486	0.129341	0.594966	0.225508
1h post exercise	MICE	CTBP1	-0.209954	17.3375	-1.52598	-4.85493	0.129358	0.594966	0.225508
1h post exercise	MICE	DGLUCY	-0.238347	15.8745	-1.52527	-4.85594	0.129536	0.595069	0.225433
1h post exercise	MICE	NDUFAF5	-0.173407	14.1532	-1.5237	-4.85813	0.129922	0.595069	0.225433
1h post exercise	HIIE	PSMB7	0.153179	17.5551	1.52303	-4.85908	0.130092	0.595069	0.225433
1h post exercise	HIIE	KRAS	0.160111	16.2135	1.52263	-4.85965	0.130194	0.595069	0.225433
1h post exercise	MICE	ATL3	-0.168245	18.0756	-1.52205	-4.86046	0.13034	0.595069	0.225433
1h post exercise	MICE	PPP2R5E	-0.247728	14.2905	-1.52144	-4.86132	0.130493	0.595069	0.225433
1h post exercise	HIIE	ACLY	0.0889402	18.8753	1.52129	-4.86152	0.130526	0.595069	0.225433
1h post exercise	HIIE	PHAF1	0.183964	14.3126	1.52125	-4.86158	0.130537	0.595069	0.225433
1h post exercise	HIIE	RBX1	0.304342	15.9314	1.52125	-4.86158	0.13054	0.595069	0.225433
1h post exercise	HIIE	NFKBIE	0.350567	12.8125	1.51906	-4.86464	0.131089	0.595069	0.225433
1h post exercise	MICE	F13A1	-0.200303	23.8773	-1.51882	-4.86498	0.13115	0.595069	0.225433
1h post exercise	MICE	NDUFA1	-0.562518	14.7537	-1.51867	-4.86519	0.131187	0.595069	0.225433
1h post exercise	MICE	WWP2	-0.237005	12.4326	-1.51837	-4.86561	0.13126	0.595069	0.225433
1h post exercise	HIIE	NDUFA2	0.190321	17.655	1.51789	-4.86629	0.131384	0.595069	0.225433
1h post exercise	HIIE	ACSF2	0.106995	14.995	1.5178	-4.86641	0.131404	0.595069	0.225433
1h post exercise	HIIE	LEPROT	0.433277	13.1563	1.51748	-4.86687	0.131489	0.595069	0.225433
1h post exercise	HIIE	LRRK2	0.273694	13.0424	1.51739	-4.86698	0.131509	0.595069	0.225433
1h post exercise	MICE	PPP6R1	-0.248797	14.8718	-1.51739	-4.86699	0.131511	0.595069	0.225433
1h post exercise	HIIE	LRCH4	0.114649	14.5044	1.51721	-4.86724	0.131552	0.595069	0.225433
1h post exercise	HIIE	LGALS3BP	0.2	15.3589	1.51716	-4.86731	0.131569	0.595069	0.225433
1h post exercise	MICE	NEU1	-0.334435	14.3081	-1.51699	-4.86754	0.13161	0.595069	0.225433
1h post exercise	MICE	PDHX	-0.194032	15.0419	-1.51665	-4.86803	0.131698	0.595069	0.225433
1h post exercise	MICE	TFPI	-0.324801	16.1801	-1.51665	-4.86803	0.131698	0.595069	0.225433
1h post exercise	HIIE	SCAF1	0.398335	13.236	1.51641	-4.86836	0.131759	0.595069	0.225433
1h post exercise	HIIE	P3H1	0.135638	16.4795	1.51587	-4.8691	0.13189	0.595069	0.225433
1h post exercise	HIIE	SMAP1	0.145691	15.4985	1.51502	-4.8703	0.132106	0.595069	0.225433
1h post exercise	HIIE	SERPIND1	0.346392	16.5114	1.51375	-4.87207	0.13243	0.595069	0.225433
1h post exercise	MICE	PCBP2	-0.115251	21.0507	-1.51361	-4.87227	0.132464	0.595069	0.225433
1h post exercise	MICE	PON2	-0.252014	15.7234	-1.51355	-4.87235	0.132482	0.595069	0.225433
1h post exercise	MICE	CIAO2B	-0.239768	14.4985	-1.51331	-4.87268	0.132542	0.595069	0.225433
1h post exercise	MICE	ACTBL2	-0.456874	22.1853	-1.51296	-4.87317	0.13263	0.595069	0.225433
1h post exercise	MICE	USP46	-0.34356	14.4027	-1.51238	-4.87399	0.132779	0.595069	0.225433
1h post exercise	HIIE	ITGAX	0.320647	17.4486	1.51202	-4.87449	0.132871	0.595069	0.225433
1h post exercise	MICE	PPP1R18	-0.233682	15.5356	-1.51198	-4.87455	0.132881	0.595069	0.225433
1h post exercise	HIIE	CARD19	0.176756	15.097	1.51189	-4.87466	0.132901	0.595069	0.225433
1h post exercise	HIIE	TMSB10	0.337275	15.9291	1.5118	-4.8748	0.132927	0.595069	0.225433
1h post exercise	HIIE	ANXA3	0.319146	19.021	1.51078	-4.87622	0.133186	0.595575	0.225063
1h post exercise	MICE	COL4A2	-0.363902	14.8452	-1.5103	-4.87689	0.133309	0.595575	0.225063
1h post exercise	HIIE	ALDH1A1	0.146243	16.8935	1.51018	-4.87705	0.133336	0.595575	0.225063
1h post exercise	HIIE	WIZ	0.470446	16.7917	1.50901	-4.87868	0.133636	0.596475	0.224408
1h post exercise	MICE	CAPZA2	-0.136592	21.7095	-1.50808	-4.87997	0.133871	0.596842	0.224141
1h post exercise	MICE	ANGEL2	-0.398934	13.8374	-1.50792	-4.8802	0.133916	0.596842	0.224141
1h post exercise	MICE	LRRC8A	-0.12828	13.8332	-1.50682	-4.88173	0.134195	0.597376	0.223752
1h post exercise	HIIE	ENO2	0.180183	16.8888	1.50627	-4.88249	0.134338	0.597376	0.223752
1h post exercise	HIIE	C7orf25	0.139275	15.8639	1.50598	-4.8829	0.13441	0.597376	0.223752
1h post exercise	HIIE	IMPDH2	0.194091	17.9267	1.50555	-4.88349	0.134523	0.597376	0.223752
1h post exercise	HIIE	C2orf69	0.224734	12.9604	1.50532	-4.8838	0.134579	0.597376	0.223752
1h post exercise	HIIE	CLCN4	0.3465	14.1313	1.50495	-4.88432	0.134677	0.597376	0.223752
1h post exercise	MICE	STEEP1	-0.402022	13.0254	-1.50444	-4.88503	0.134808	0.597376	0.223752
1h post exercise	HIIE	DPYD	0.185481	17.7201	1.50428	-4.88525	0.13485	0.597376	0.223752
1h post exercise	MICE	WDR33	-0.213323	12.4375	-1.50397	-4.88568	0.134926	0.597376	0.223752
1h post exercise	HIIE	APEH	0.11562	18.527	1.50266	-4.88749	0.135263	0.598056	0.223258
1h post exercise	MICE	VPS4A	-0.195748	16.8354	-1.50239	-4.88787	0.135336	0.598056	0.223258
1h post exercise	HIIE	APCS	0.307005	15.8883	1.5022	-4.88814	0.135386	0.598056	0.223258
1h post exercise	HIIE	SMG8	0.167316	13.4438	1.50183	-4.88864	0.135476	0.598056	0.223258
1h post exercise	MICE	PIP5K1C	-0.180592	14.3189	-1.50052	-4.89045	0.135815	0.598142	0.223196
1h post exercise	HIIE	GAS7	0.325573	12.8833	1.50035	-4.89069	0.135862	0.598142	0.223196
1h post exercise	HIIE	MLYCD	0.133323	15.73	1.50007	-4.89108	0.135932	0.598142	0.223196
1h post exercise	MICE	MTX1	-0.151964	15.1196	-1.49995	-4.89125	0.135964	0.598142	0.223196
1h post exercise	MICE	SIL1	-0.205773	14.0469	-1.49985	-4.89139	0.135991	0.598142	0.223196
1h post exercise	HIIE	CYP4F3	0.651128	12.852	1.49889	-4.89271	0.136241	0.598417	0.222996
1h post exercise	HIIE	UBR4	0.0768272	17.0677	1.49876	-4.8929	0.136272	0.598417	0.222996
1h post exercise	MICE	COG1	-0.183044	14.397	-1.49846	-4.89331	0.136351	0.598417	0.222996
Post exercise	MICE	SYS1	-0.531271	14.0975	-2.98866	-1.88816	0.00333099	0.598828	0.222698
Post exercise	MICE	PRMT2	-0.40184	13.9426	-2.98468	-1.89727	0.00337144	0.598828	0.222698
1h post exercise	MICE	UBAP2L	-0.298496	14.9697	-1.49738	-4.8948	0.136633	0.598847	0.222684
1h post exercise	HIIE	SURF4	0.194889	18.0857	1.49733	-4.89488	0.136647	0.598847	0.222684
1h post exercise	HIIE	B3GLCT	0.372093	13.6074	1.49409	-4.89934	0.137489	0.599228	0.222408
1h post exercise	HIIE	TNK2	0.216044	13.5641	1.49403	-4.89943	0.137505	0.599228	0.222408
1h post exercise	HIIE	PCTP	0.187901	14.6738	1.49391	-4.89959	0.137536	0.599228	0.222408
1h post exercise	HIIE	HPS3	0.222873	12.4932	1.49336	-4.90035	0.137678	0.599228	0.222408
1h post exercise	MICE	EIF3F	-0.27305	17.1283	-1.49311	-4.90069	0.137746	0.599228	0.222408
1h post exercise	MICE	ATP6V1A	-0.193938	19.0596	-1.49255	-4.90146	0.137891	0.599228	0.222408
1h post exercise	HIIE	LDAH	0.108335	16.5048	1.49117	-4.90336	0.138251	0.599228	0.222408
1h post exercise	HIIE	SPTAN1	0.199368	17.5477	1.49095	-4.90366	0.138311	0.599228	0.222408
1h post exercise	MICE	HSPD1	-0.316589	19.5915	-1.49082	-4.90384	0.138346	0.599228	0.222408
1h post exercise	HIIE	IGF2R	0.320536	15.6735	1.49081	-4.90386	0.138349	0.599228	0.222408
1h post exercise	MICE	SH3GLB2	-0.247191	15.4377	-1.4906	-4.90414	0.138403	0.599228	0.222408
1h post exercise	HIIE	MLLT1	0.372685	12.7989	1.49036	-4.90447	0.138465	0.599228	0.222408
1h post exercise	HIIE	CUL9	0.278445	13.8806	1.49022	-4.90466	0.138503	0.599228	0.222408
1h post exercise	HIIE	THOP1	0.198169	15.0012	1.4897	-4.90539	0.138641	0.599228	0.222408
1h post exercise	MICE	ZNF318	-0.361233	12.2692	-1.48952	-4.90563	0.138687	0.599228	0.222408
1h post exercise	HIIE	CD63	0.329715	17.5682	1.48905	-4.90628	0.138812	0.599228	0.222408
1h post exercise	MICE	NIN	-0.306724	13.9627	-1.48807	-4.90762	0.139069	0.599228	0.222408
1h post exercise	HIIE	LHPP	0.22556	16.4457	1.48757	-4.9083	0.1392	0.599228	0.222408
1h post exercise	MICE	UAP1L1	-0.152616	14.8081	-1.48674	-4.90944	0.139416	0.599228	0.222408
1h post exercise	HIIE	COMMD1	0.174745	16.5026	1.48563	-4.91097	0.139714	0.599228	0.222408
1h post exercise	MICE	TTLL12	-0.227702	16.0964	-1.48516	-4.91161	0.139838	0.599228	0.222408
1h post exercise	HIIE	ERO1A	0.217081	17.0716	1.48515	-4.91162	0.139839	0.599228	0.222408
1h post exercise	HIIE	PITPNB	0.110682	17.4739	1.48485	-4.91204	0.139916	0.599228	0.222408
1h post exercise	HIIE	VAMP7	0.103737	18.3578	1.48474	-4.91219	0.139945	0.599228	0.222408
1h post exercise	MICE	PDE12	-0.115154	16.8072	-1.48462	-4.91235	0.139977	0.599228	0.222408
1h post exercise	MICE	LAGE3	-0.3527	13.9595	-1.48357	-4.91379	0.140259	0.599228	0.222408
1h post exercise	MICE	TCP1	-0.165015	19.5979	-1.4831	-4.91444	0.140384	0.599228	0.222408
1h post exercise	MICE	RAP2B	-0.251025	18.1397	-1.48242	-4.91536	0.140562	0.599228	0.222408
1h post exercise	HIIE	ENO1	0.124551	23.4416	1.48227	-4.91556	0.140599	0.599228	0.222408
1h post exercise	MICE	DDX47	-0.194001	14.7014	-1.4821	-4.9158	0.140647	0.599228	0.222408
1h post exercise	MICE	SH3KBP1	-0.267002	16.5737	-1.48197	-4.91598	0.140683	0.599228	0.222408
1h post exercise	HIIE	GTF3C2	0.35902	13.0535	1.48185	-4.91614	0.140714	0.599228	0.222408
1h post exercise	MICE	MRPS9	-0.206409	14.2749	-1.48171	-4.91633	0.140752	0.599228	0.222408
1h post exercise	HIIE	STARD7	0.235076	13.8985	1.48101	-4.91729	0.140939	0.599228	0.222408
1h post exercise	MICE	GTPBP1	-0.107436	15.8903	-1.48073	-4.91767	0.141009	0.599228	0.222408
1h post exercise	HIIE	RNH1	0.392172	18.9333	1.48072	-4.91769	0.141016	0.599228	0.222408
1h post exercise	HIIE	ARL5A	0.20474	14.4274	1.48065	-4.91779	0.141035	0.599228	0.222408
1h post exercise	HIIE	AFTPH	0.294325	12.1833	1.48041	-4.91811	0.141098	0.599228	0.222408
1h post exercise	HIIE	IRAK1	0.351325	11.7332	1.47981	-4.91893	0.141257	0.599228	0.222408
1h post exercise	HIIE	QPCT	0.534158	14.0275	1.47865	-4.92051	0.141566	0.599228	0.222408
1h post exercise	HIIE	CD300LF	0.372603	13.8033	1.47841	-4.92083	0.14163	0.599228	0.222408
1h post exercise	HIIE	EIF2S3	0.106989	18.1691	1.47829	-4.921	0.141661	0.599228	0.222408
1h post exercise	HIIE	AGO3	0.2157	13.7621	1.47816	-4.92118	0.141697	0.599228	0.222408
1h post exercise	HIIE	SETMAR	0.243011	12.9997	1.47816	-4.92118	0.141699	0.599228	0.222408
1h post exercise	HIIE	LNPK	0.176124	16.5115	1.47814	-4.92121	0.141704	0.599228	0.222408
1h post exercise	HIIE	HBB	0.484707	18.5213	1.478	-4.9214	0.141741	0.599228	0.222408
1h post exercise	HIIE	PPP3CA	0.099816	18.3249	1.47799	-4.92141	0.141741	0.599228	0.222408
1h post exercise	MICE	ADD1	-0.0994154	18.1885	-1.47771	-4.92179	0.141816	0.599228	0.222408
1h post exercise	HIIE	AZGP1	0.330904	14.7045	1.47755	-4.92201	0.14186	0.599228	0.222408
1h post exercise	MICE	STRN4	-0.192717	16.159	-1.47754	-4.92203	0.141864	0.599228	0.222408
1h post exercise	HIIE	ALDH2	0.281323	18.2472	1.4775	-4.92208	0.141875	0.599228	0.222408
1h post exercise	HIIE	NAXE	0.106475	17.6187	1.47742	-4.92219	0.141894	0.599228	0.222408
1h post exercise	HIIE	FBXO7	0.127235	15.5989	1.47683	-4.923	0.142052	0.599477	0.222228
1h post exercise	MICE	SMG9	-0.367497	14.7774	-1.47584	-4.92434	0.142319	0.600095	0.22178
1h post exercise	MICE	MAN1B1	-0.250953	12.5466	-1.4754	-4.92494	0.142437	0.600095	0.22178
1h post exercise	MICE	TSC22D4	-0.27705	13.7907	-1.47518	-4.92524	0.142496	0.600095	0.22178
1h post exercise	HIIE	CPXM1	0.336111	14.2945	1.47407	-4.92675	0.142794	0.600617	0.221402
1h post exercise	HIIE	ATP5F1D	0.203831	16.9341	1.47326	-4.92785	0.143012	0.600617	0.221402
1h post exercise	MICE	MATR3	-0.206378	16.2842	-1.47312	-4.92804	0.143049	0.600617	0.221402
1h post exercise	HIIE	CD99	0.439053	12.4064	1.47304	-4.92815	0.143072	0.600617	0.221402
1h post exercise	HIIE	OCIAD1	0.16703	16.2428	1.47287	-4.92838	0.143118	0.600617	0.221402
1h post exercise	MICE	MAPKAP1	-0.204188	13.9051	-1.4719	-4.92971	0.143379	0.601296	0.220912
1h post exercise	MICE	SMARCB1	-0.201403	15.913	-1.47144	-4.93032	0.143502	0.601349	0.220873
1h post exercise	HIIE	C8B	0.221548	14.593	1.47112	-4.93077	0.143591	0.601349	0.220873
1h post exercise	MICE	HEATR5B	-0.116721	14.646	-1.47028	-4.9319	0.143813	0.601864	0.220502
1h post exercise	MICE	PSMD14	-0.219369	17.6631	-1.46987	-4.93246	0.143928	0.601925	0.220457
1h post exercise	MICE	PIK3R1	-0.115771	16.1051	-1.46949	-4.93297	0.144028	0.601927	0.220456
1h post exercise	MICE	USO1	-0.175138	16.8395	-1.46824	-4.93467	0.144369	0.602881	0.219768
1h post exercise	MICE	BTK	-0.165899	18.4577	-1.46768	-4.93542	0.14452	0.602881	0.219768
1h post exercise	HIIE	LETMD1	0.203333	15.3284	1.46639	-4.93718	0.144872	0.602881	0.219768
1h post exercise	HIIE	DIP2B	0.212824	14.0786	1.46586	-4.93789	0.145016	0.602881	0.219768
1h post exercise	MICE	COPS4	-0.191865	15.5852	-1.46581	-4.93796	0.14503	0.602881	0.219768
1h post exercise	HIIE	NDUFS4	0.195797	17.5633	1.46572	-4.93808	0.145054	0.602881	0.219768
1h post exercise	HIIE	FAF1	0.0920654	15.7402	1.46571	-4.9381	0.145054	0.602881	0.219768
1h post exercise	HIIE	HELZ	0.162617	14.0244	1.4657	-4.9381	0.145055	0.602881	0.219768
1h post exercise	HIIE	PSAT1	0.374479	14.0065	1.46521	-4.93878	0.145194	0.60289	0.219762
1h post exercise	HIIE	CLTA	0.279994	17.1302	1.46498	-4.93909	0.145257	0.60289	0.219762
1h post exercise	HIIE	TRAF7	0.169521	14.0501	1.46346	-4.94113	0.145666	0.604044	0.218931
1h post exercise	MICE	WARS1	-0.134094	16.9642	-1.46313	-4.94158	0.145757	0.604044	0.218931
1h post exercise	HIIE	AGTPBP1	0.214668	14.4255	1.46286	-4.94195	0.145835	0.604044	0.218931
1h post exercise	HIIE	EMC2	0.113648	16.9127	1.46142	-4.94389	0.146226	0.60452	0.218589
1h post exercise	HIIE	ADGRG1	0.20514	14.0692	1.46119	-4.9442	0.146291	0.60452	0.218589
1h post exercise	MICE	ALYREF	-0.215495	17.4046	-1.46091	-4.94458	0.146369	0.60452	0.218589
1h post exercise	MICE	TUBB4B	-0.270839	24.043	-1.4604	-4.94527	0.146509	0.60452	0.218589
1h post exercise	HIIE	LIN7C	0.245568	14.5905	1.46024	-4.94547	0.14655	0.60452	0.218589
1h post exercise	HIIE	RPL12	0.313664	19.3393	1.45973	-4.94617	0.146693	0.60452	0.218589
1h post exercise	MICE	TMEM41A	-0.200584	15.7152	-1.45955	-4.94641	0.146741	0.60452	0.218589
1h post exercise	MICE	ARHGAP6	-0.326351	17.8326	-1.45942	-4.94658	0.146775	0.60452	0.218589
1h post exercise	MICE	TBC1D22A	-0.156618	15.6565	-1.45914	-4.94696	0.146851	0.60452	0.218589
1h post exercise	HIIE	SETD2	0.383369	14.6285	1.45729	-4.94945	0.147362	0.605689	0.217751
1h post exercise	HIIE	TOR1A	0.11802	15.5578	1.45728	-4.94946	0.147361	0.605689	0.217751
1h post exercise	MICE	CRYL1	-0.14896	17.1277	-1.45638	-4.95068	0.147612	0.605689	0.217751
1h post exercise	HIIE	CACYBP	0.130903	17.0876	1.45618	-4.95094	0.147665	0.605689	0.217751
1h post exercise	MICE	MAP1S	-0.123426	15.4779	-1.45544	-4.95194	0.14787	0.605689	0.217751
1h post exercise	MICE	TDRP	-0.451888	14.7168	-1.45526	-4.95218	0.147922	0.605689	0.217751
1h post exercise	HIIE	CPNE8	0.247874	13.43	1.45509	-4.95241	0.147969	0.605689	0.217751
1h post exercise	MICE	TUBB1	-0.327045	23.0604	-1.4549	-4.95267	0.148024	0.605689	0.217751
1h post exercise	HIIE	GMIP	0.10694	16.0658	1.45483	-4.95275	0.148037	0.605689	0.217751
1h post exercise	HIIE	ARIH2	0.149022	13.9685	1.45394	-4.95396	0.148285	0.606036	0.217501
1h post exercise	MICE	ACOT1	-0.12956	17.4685	-1.4538	-4.95414	0.148323	0.606036	0.217501
1h post exercise	HIIE	DNAJB11	0.12627	18.1001	1.45314	-4.95502	0.148505	0.606136	0.21743
1h post exercise	MICE	RPS6KA3	-0.132991	16.9542	-1.45299	-4.95523	0.148548	0.606136	0.21743
1h post exercise	MICE	PRKACA	-0.262151	15.588	-1.45195	-4.95662	0.148839	0.606914	0.216873
1h post exercise	MICE	CARS1	-0.12755	17.0561	-1.45081	-4.95815	0.149153	0.607783	0.216251
1h post exercise	MICE	NAXD	-0.173243	15.6799	-1.45022	-4.95894	0.14932	0.608054	0.216058
1h post exercise	HIIE	DEGS1	0.285552	13.8909	1.44959	-4.95978	0.149495	0.608357	0.215842
1h post exercise	HIIE	MTPAP	0.144773	13.1373	1.44761	-4.96243	0.150045	0.610185	0.214538
1h post exercise	HIIE	TOX4	0.184397	13.9041	1.44544	-4.96533	0.150652	0.61224	0.213078
1h post exercise	HIIE	SLC11A1	0.406941	13.062	1.44476	-4.96623	0.150845	0.612612	0.212814
1h post exercise	MICE	GALK1	-0.155293	16.9756	-1.44405	-4.96718	0.151044	0.612623	0.212807
1h post exercise	HIIE	YIF1B	0.236033	16.4764	1.44403	-4.96721	0.151051	0.612623	0.212807
1h post exercise	MICE	TREML1	-0.33756	20.7981	-1.44338	-4.96808	0.151234	0.612954	0.212572
1h post exercise	MICE	MTIF3	-0.184213	14.3848	-1.44273	-4.96895	0.151416	0.613036	0.212514
1h post exercise	HIIE	GYG1	0.174093	16.7474	1.44248	-4.96928	0.151488	0.613036	0.212514
1h post exercise	HIIE	PSPH	0.332386	13.784	1.44182	-4.97016	0.151674	0.613036	0.212514
1h post exercise	HIIE	BGN	0.312137	14.4569	1.44144	-4.97066	0.15178	0.613036	0.212514
1h post exercise	HIIE	MYG1	0.17989	16.2024	1.44077	-4.97156	0.151969	0.613036	0.212514
1h post exercise	HIIE	PPM1B	0.1689	15.9174	1.4407	-4.97165	0.151988	0.613036	0.212514
1h post exercise	HIIE	PIGB	0.213095	14.1201	1.43959	-4.97313	0.152303	0.613036	0.212514
1h post exercise	HIIE	CSNK2A1	0.114859	16.815	1.43933	-4.97347	0.152373	0.613036	0.212514
1h post exercise	HIIE	SLC25A22	0.174766	15.8473	1.43911	-4.97376	0.152437	0.613036	0.212514
1h post exercise	HIIE	RAB43	0.200681	20.7673	1.43842	-4.97469	0.152634	0.613036	0.212514
1h post exercise	HIIE	BANF1	0.255244	16.1629	1.43815	-4.97504	0.152709	0.613036	0.212514
1h post exercise	HIIE	GOT1	0.115579	17.7238	1.43799	-4.97525	0.152751	0.613036	0.212514
1h post exercise	HIIE	ISYNA1	0.134611	15.8932	1.43765	-4.9757	0.152848	0.613036	0.212514
1h post exercise	MICE	MARCKSL1	-0.509912	12.8837	-1.43693	-4.97666	0.153056	0.613036	0.212514
1h post exercise	MICE	HACD4	-0.255797	17.6125	-1.43645	-4.97729	0.153191	0.613036	0.212514
1h post exercise	HIIE	FCN1	0.304648	17.3117	1.43558	-4.97845	0.15344	0.613036	0.212514
1h post exercise	HIIE	MAP4K4	0.0896743	18.7177	1.43521	-4.97894	0.153541	0.613036	0.212514
1h post exercise	HIIE	CXorf38	0.1992	15.2143	1.43514	-4.97903	0.153564	0.613036	0.212514
1h post exercise	HIIE	RRP15	0.372373	13.4016	1.43453	-4.97984	0.153737	0.613036	0.212514
1h post exercise	MICE	GFPT1	-0.149907	15.7895	-1.43441	-4.98	0.153769	0.613036	0.212514
1h post exercise	HIIE	EIF6	0.199342	17.2675	1.43431	-4.98013	0.1538	0.613036	0.212514
1h post exercise	HIIE	CWC27	0.283137	13.2738	1.43373	-4.9809	0.153965	0.613036	0.212514
1h post exercise	HIIE	PSMB1	0.134545	18.7715	1.43338	-4.98136	0.154062	0.613036	0.212514
1h post exercise	HIIE	C8G	0.203838	13.9203	1.43327	-4.98151	0.154095	0.613036	0.212514
1h post exercise	HIIE	YEATS4	0.261834	14.0238	1.43305	-4.98181	0.15416	0.613036	0.212514
1h post exercise	HIIE	MIPEP	0.139456	15.1984	1.43305	-4.98181	0.154157	0.613036	0.212514
1h post exercise	MICE	CAND1	-0.241495	18.2763	-1.4323	-4.98279	0.154373	0.613036	0.212514
1h post exercise	MICE	NDUFA10	-0.175703	17.9976	-1.43223	-4.98289	0.154394	0.613036	0.212514
1h post exercise	HIIE	NDC1	0.344473	12.7682	1.43176	-4.98351	0.154528	0.613036	0.212514
1h post exercise	MICE	TMEM222	-0.395866	15.1392	-1.43165	-4.98365	0.154559	0.613036	0.212514
1h post exercise	HIIE	COLGALT1	0.202378	17.1045	1.43134	-4.98406	0.154647	0.613036	0.212514
1h post exercise	HIIE	PSMB9	0.191433	19.2666	1.43067	-4.98495	0.154839	0.613036	0.212514
1h post exercise	HIIE	NACC1	0.220941	14.8375	1.43028	-4.98547	0.154952	0.613036	0.212514
1h post exercise	MICE	PPP6R3	-0.239952	15.7715	-1.43024	-4.98551	0.154961	0.613036	0.212514
1h post exercise	MICE	GYS1	-0.139676	16.9505	-1.42988	-4.98599	0.155062	0.613036	0.212514
1h post exercise	HIIE	TBC1D10B	0.128647	14.8516	1.42986	-4.98602	0.155068	0.613036	0.212514
1h post exercise	HIIE	CLN5	0.204814	14.5193	1.42974	-4.98618	0.155107	0.613036	0.212514
1h post exercise	MICE	EIF4G1	-0.121646	18.4369	-1.42967	-4.98626	0.155121	0.613036	0.212514
1h post exercise	HIIE	PPIL4	0.207003	15.2249	1.42937	-4.98667	0.155213	0.613036	0.212514
1h post exercise	MICE	TAX1BP3	-0.229904	15.345	-1.42846	-4.98787	0.155474	0.613254	0.21236
1h post exercise	MICE	NOM1	-0.280968	12.0441	-1.42828	-4.98811	0.155525	0.613254	0.21236
1h post exercise	HIIE	DCAF8	0.275231	14.1394	1.42803	-4.98844	0.155597	0.613254	0.21236
1h post exercise	HIIE	NRDC	0.0838607	16.7305	1.42674	-4.99014	0.155966	0.613254	0.21236
1h post exercise	HIIE	HMGB3	0.335786	17.0076	1.42626	-4.99077	0.156106	0.613254	0.21236
1h post exercise	HIIE	COPE	0.115866	17.7876	1.42617	-4.99089	0.156129	0.613254	0.21236
1h post exercise	MICE	HSP90B1	-0.138029	22.6531	-1.42616	-4.99091	0.156133	0.613254	0.21236
1h post exercise	HIIE	FN3KRP	0.126959	15.0317	1.42585	-4.99131	0.156222	0.613254	0.21236
1h post exercise	MICE	DERL1	-0.407445	16.7565	-1.42564	-4.99158	0.156283	0.613254	0.21236
1h post exercise	HIIE	ZNF346	0.260973	12.5032	1.42564	-4.99158	0.156284	0.613254	0.21236
1h post exercise	HIIE	PREP	0.0894729	18.1198	1.42495	-4.99249	0.156479	0.613621	0.2121
1h post exercise	MICE	CMPK2	-0.281132	13.5022	-1.4245	-4.99309	0.156613	0.613749	0.212009
1h post exercise	MICE	CCDC124	-0.270449	13.6252	-1.42267	-4.99549	0.157141	0.6145	0.211478
1h post exercise	MICE	NAPA	-0.199946	18.7177	-1.42263	-4.99555	0.157154	0.6145	0.211478
1h post exercise	HIIE	FYN	0.0923521	20.9878	1.42227	-4.99602	0.157256	0.6145	0.211478
1h post exercise	HIIE	CC2D1B	0.101058	15.3539	1.42203	-4.99633	0.157324	0.6145	0.211478
1h post exercise	HIIE	BIRC2	0.168812	12.9198	1.42161	-4.99689	0.157447	0.6145	0.211478
1h post exercise	HIIE	TOR1AIP2	0.21828	14.2073	1.42153	-4.99699	0.157473	0.6145	0.211478
1h post exercise	MICE	CLIC1	-0.135405	22.1954	-1.42111	-4.99754	0.15759	0.6145	0.211478
1h post exercise	HIIE	SNRPF	0.41784	16.0655	1.42103	-4.99765	0.157619	0.6145	0.211478
1h post exercise	HIIE	EXOSC5	0.310261	14.6572	1.41956	-4.99957	0.158044	0.615089	0.211062
1h post exercise	HIIE	ATP5MG	0.0813072	20.5125	1.41933	-4.99988	0.158108	0.615089	0.211062
1h post exercise	HIIE	RALA	0.13719	16.0825	1.41912	-5.00016	0.15817	0.615089	0.211062
1h post exercise	MICE	MAPKAPK3	-0.141177	16.4382	-1.4191	-5.00018	0.158177	0.615089	0.211062
1h post exercise	HIIE	PHF23	0.290055	13.4656	1.4186	-5.00083	0.158324	0.615262	0.21094
1h post exercise	MICE	PFKL	-0.0827475	18.3807	-1.41767	-5.00205	0.158592	0.615763	0.210586
1h post exercise	MICE	MARS1	-0.125946	15.9361	-1.41739	-5.00242	0.158672	0.615763	0.210586
1h post exercise	MICE	POLR3A	-0.266914	13.153	-1.41693	-5.00302	0.15881	0.615763	0.210586
1h post exercise	HIIE	CAMP	0.706432	15.2801	1.41676	-5.00325	0.158861	0.615763	0.210586
1h post exercise	HIIE	RAB33B	0.132527	16.233	1.41477	-5.00585	0.159438	0.617229	0.209554
1h post exercise	MICE	JADE2	-0.323617	12.4727	-1.41477	-5.00585	0.159443	0.617229	0.209554
1h post exercise	HIIE	LYZ	0.344971	22.4346	1.41421	-5.00658	0.159607	0.617466	0.209387
1h post exercise	HIIE	GBE1	0.0930932	17.5238	1.41357	-5.00742	0.159791	0.617785	0.209162
1h post exercise	HIIE	SMC4	0.204788	13.9813	1.413	-5.00816	0.159961	0.617821	0.209137
1h post exercise	HIIE	TRIM21	0.0937513	17.3686	1.41284	-5.00837	0.160005	0.617821	0.209137
1h post exercise	MICE	KIF3C	-0.195269	11.5365	-1.41224	-5.00915	0.160181	0.617895	0.209086
1h post exercise	MICE	PDCD10	-0.249813	18.1338	-1.41188	-5.00962	0.160289	0.617895	0.209086
1h post exercise	MICE	ALG1	-0.15964	17.2457	-1.41147	-5.01016	0.160412	0.617895	0.209086
1h post exercise	MICE	SCARF1	-0.324249	15.1904	-1.41091	-5.01089	0.160575	0.617895	0.209086
1h post exercise	HIIE	OGDH	0.115406	19.3325	1.4106	-5.01129	0.160663	0.617895	0.209086
1h post exercise	HIIE	NOC4L	0.312973	13.6864	1.41036	-5.01161	0.160738	0.617895	0.209086
1h post exercise	HIIE	THEMIS	0.32218	13.9303	1.41035	-5.01162	0.160741	0.617895	0.209086
1h post exercise	HIIE	SRI	0.171209	17.8456	1.40998	-5.0121	0.16085	0.617921	0.209067
1h post exercise	MICE	EIF4A3	-0.21952	17.7082	-1.409	-5.01338	0.161138	0.618222	0.208855
1h post exercise	HIIE	IVD	0.102282	19.1653	1.4088	-5.01363	0.161193	0.618222	0.208855
1h post exercise	HIIE	NCOR2	0.215276	13.0206	1.40867	-5.01381	0.161235	0.618222	0.208855
1h post exercise	MICE	CERS2	-0.170423	18.7805	-1.40622	-5.017	0.161961	0.619839	0.207721
1h post exercise	MICE	NAMPT	-0.170752	16.7001	-1.40611	-5.01714	0.161994	0.619839	0.207721
1h post exercise	MICE	P4HA1	-0.136563	13.5248	-1.40548	-5.01796	0.162177	0.619839	0.207721
1h post exercise	HIIE	BTN3A1	0.135232	14.5317	1.40543	-5.01802	0.162192	0.619839	0.207721
1h post exercise	MICE	PYGL	-0.187269	18.7197	-1.40531	-5.01818	0.16223	0.619839	0.207721
1h post exercise	HIIE	RASGRP4	0.301013	12.3788	1.40517	-5.01836	0.162273	0.619839	0.207721
Post exercise	HIIE	CARD16	0.77023	12.178	2.95492	-1.96579	0.00369249	0.620155	0.2075
Post exercise	MICE	TMEM41A	-0.403396	15.7152	-2.95453	-1.96669	0.0036969	0.620155	0.2075
1h post exercise	HIIE	OPA3	0.163726	16.6566	1.40386	-5.02005	0.16266	0.620186	0.207478
1h post exercise	MICE	DIMT1	-0.242312	14.911	-1.40362	-5.02037	0.162733	0.620186	0.207478
1h post exercise	MICE	MPP1	-0.19902	19.5793	-1.40327	-5.02082	0.162835	0.620186	0.207478
1h post exercise	HIIE	WDR13	0.139284	16.1079	1.4027	-5.02156	0.163003	0.620186	0.207478
1h post exercise	MICE	TBCD	-0.126752	16.0933	-1.40255	-5.02176	0.163047	0.620186	0.207478
1h post exercise	MICE	PYGB	-0.201071	20.7511	-1.40254	-5.02177	0.163053	0.620186	0.207478
1h post exercise	MICE	ABHD17B	-0.171083	15.4931	-1.40244	-5.0219	0.163083	0.620186	0.207478
1h post exercise	HIIE	EIF3H	0.152647	17.6867	1.40117	-5.02355	0.163463	0.621237	0.206743
1h post exercise	MICE	PDHB	-0.261042	18.2869	-1.40074	-5.0241	0.163589	0.621237	0.206743
1h post exercise	HIIE	SEPTIN6	0.0867902	20.2518	1.40021	-5.02479	0.163745	0.621237	0.206743
1h post exercise	HIIE	MICU2	0.132365	15.3828	1.40004	-5.02501	0.163796	0.621237	0.206743
1h post exercise	MICE	RFC2	-0.515912	14.0716	-1.39963	-5.02554	0.163923	0.621237	0.206743
1h post exercise	MICE	OSBP2	-0.544497	13.4666	-1.39924	-5.02605	0.16404	0.621237	0.206743
1h post exercise	HIIE	TBL3	0.395177	13.3585	1.39888	-5.02652	0.164148	0.621237	0.206743
1h post exercise	MICE	ERAP1	-0.156711	18.9546	-1.39843	-5.0271	0.164282	0.621237	0.206743
1h post exercise	HIIE	QPCTL	0.161227	14.4916	1.39775	-5.02797	0.164482	0.621237	0.206743
1h post exercise	MICE	UROS	-0.24356	12.6419	-1.39773	-5.028	0.164491	0.621237	0.206743
1h post exercise	HIIE	ABAT	0.15802	14.6769	1.39745	-5.02836	0.164572	0.621237	0.206743
1h post exercise	HIIE	SP140L	0.25991	13.7007	1.39717	-5.02872	0.164659	0.621237	0.206743
1h post exercise	MICE	BNIP2	-0.191283	16.488	-1.39704	-5.02888	0.164696	0.621237	0.206743
1h post exercise	HIIE	DENND4B	0.189473	14.2717	1.39635	-5.02978	0.164905	0.621438	0.206602
1h post exercise	HIIE	COX7B	0.200791	15.3243	1.39618	-5.03	0.164955	0.621438	0.206602
1h post exercise	MICE	ARHGEF1	-0.159487	17.5735	-1.39582	-5.03046	0.165064	0.62146	0.206587
1h post exercise	MICE	ACO1	-0.14859	17.4172	-1.39494	-5.0316	0.165329	0.621662	0.206446
1h post exercise	HIIE	SEC62	0.178393	16.5721	1.39473	-5.03187	0.165392	0.621662	0.206446
1h post exercise	MICE	HSP90AB3P	-0.642418	17.853	-1.39365	-5.03326	0.165718	0.621662	0.206446
1h post exercise	HIIE	FAM20B	0.13781	14.2343	1.3934	-5.03358	0.16579	0.621662	0.206446
1h post exercise	MICE	PRKCD	-0.115608	18.3177	-1.39323	-5.0338	0.165839	0.621662	0.206446
1h post exercise	MICE	DNAJB1	-0.124667	17.1804	-1.39304	-5.03405	0.165898	0.621662	0.206446
1h post exercise	HIIE	NDUFS2	0.138572	16.7694	1.39264	-5.03456	0.166019	0.621662	0.206446
1h post exercise	MICE	INTS9	-0.267074	12.6341	-1.39263	-5.03458	0.166026	0.621662	0.206446
1h post exercise	HIIE	CASP9	0.251723	14.5532	1.39257	-5.03466	0.166044	0.621662	0.206446
1h post exercise	MICE	RHEB	-0.263202	18.2	-1.39038	-5.03747	0.166705	0.623603	0.205092
1h post exercise	HIIE	HIBADH	0.132249	16.5867	1.38994	-5.03804	0.166836	0.623603	0.205092
1h post exercise	HIIE	CARMIL2	0.21252	13.4948	1.38941	-5.03872	0.166999	0.623603	0.205092
1h post exercise	MICE	SNX2	-0.155456	15.3131	-1.38927	-5.03889	0.167039	0.623603	0.205092
1h post exercise	HIIE	STEAP4	0.454557	13.4591	1.38869	-5.03964	0.167218	0.623603	0.205092
1h post exercise	MICE	HCLS1	-0.205974	16.9867	-1.38867	-5.03966	0.167223	0.623603	0.205092
1h post exercise	HIIE	IFI30	0.287562	15.1801	1.38847	-5.03993	0.167285	0.623603	0.205092
1h post exercise	MICE	PRKD2	-0.179325	15.1869	-1.38776	-5.04083	0.167499	0.623826	0.204937
1h post exercise	HIIE	B3GALT6	0.115467	14.3916	1.38758	-5.04106	0.167552	0.623826	0.204937
1h post exercise	MICE	CASS4	-0.289177	17.4259	-1.38682	-5.04204	0.167787	0.624214	0.204666
1h post exercise	MICE	GRK3	-0.216486	14.7953	-1.38657	-5.04236	0.167863	0.624214	0.204666
1h post exercise	HIIE	MAGT1	0.153031	17.4686	1.38541	-5.04384	0.168215	0.624643	0.204368
1h post exercise	HIIE	CTSD	0.155974	20.3298	1.38529	-5.044	0.168253	0.624643	0.204368
1h post exercise	HIIE	TCAF1	0.171313	12.8168	1.38484	-5.04457	0.168386	0.624643	0.204368
1h post exercise	HIIE	USP15	0.0787928	17.3614	1.38482	-5.0446	0.168392	0.624643	0.204368
1h post exercise	HIIE	NPC1	0.204929	13.999	1.38411	-5.04551	0.168613	0.625009	0.204114
1h post exercise	MICE	STK39	-0.102954	16.5059	-1.38382	-5.04588	0.168698	0.625009	0.204114
1h post exercise	HIIE	NIF3L1	0.134877	17.0723	1.38243	-5.04766	0.169125	0.626125	0.203339
1h post exercise	HIIE	IRGQ	0.239664	15.8435	1.38165	-5.04866	0.169366	0.626125	0.203339
1h post exercise	MICE	ZAP70	-0.271111	15.6838	-1.38163	-5.04869	0.169373	0.626125	0.203339
1h post exercise	HIIE	DHRSX	0.264038	13.844	1.38103	-5.04945	0.169557	0.626125	0.203339
1h post exercise	HIIE	SUCNR1	0.335337	14.6787	1.38021	-5.0505	0.169808	0.626125	0.203339
1h post exercise	MICE	HSPA1B	-0.131292	22.0435	-1.37996	-5.05082	0.169882	0.626125	0.203339
1h post exercise	HIIE	MTIF2	0.145511	15.0571	1.37972	-5.05113	0.169956	0.626125	0.203339
1h post exercise	HIIE	TMEM14C	0.380255	14.7123	1.37951	-5.05139	0.170024	0.626125	0.203339
1h post exercise	MICE	AIG1	-0.243899	10.875	-1.37877	-5.05234	0.170248	0.626125	0.203339
1h post exercise	HIIE	TOP3B	0.183703	13.8392	1.37876	-5.05235	0.170252	0.626125	0.203339
1h post exercise	HIIE	FAM118A	0.280765	11.6946	1.37608	-5.05577	0.171081	0.626125	0.203339
1h post exercise	MICE	SFXN3	-0.174271	17.4181	-1.37559	-5.05638	0.17123	0.626125	0.203339
1h post exercise	HIIE	RPIA	0.212587	16.5753	1.37503	-5.05709	0.171403	0.626125	0.203339
1h post exercise	HIIE	TCIRG1	0.251026	15.4876	1.37483	-5.05735	0.171466	0.626125	0.203339
1h post exercise	HIIE	VPS13C	0.0636684	17.6893	1.37459	-5.05765	0.171536	0.626125	0.203339
1h post exercise	HIIE	MZT2A	0.301347	13.5413	1.37403	-5.05837	0.171714	0.626125	0.203339
1h post exercise	HIIE	COMMD3	0.133829	13.6629	1.37354	-5.05898	0.171861	0.626125	0.203339
1h post exercise	HIIE	QKI	0.218347	15.4256	1.37314	-5.0595	0.17199	0.626125	0.203339
1h post exercise	MICE	RPL39	-0.344588	17.7276	-1.37296	-5.05973	0.172045	0.626125	0.203339
1h post exercise	HIIE	SUMO2	0.305821	12.6721	1.37248	-5.06034	0.172194	0.626125	0.203339
1h post exercise	HIIE	MYCBP	0.238361	16.2585	1.37225	-5.06063	0.172266	0.626125	0.203339
1h post exercise	HIIE	ND5	0.228566	13.4837	1.37221	-5.06068	0.172277	0.626125	0.203339
1h post exercise	MICE	NNT	-0.213585	20.3297	-1.37165	-5.06139	0.172452	0.626125	0.203339
1h post exercise	HIIE	CASP7	0.194134	14.6176	1.37161	-5.06144	0.172463	0.626125	0.203339
1h post exercise	HIIE	SNAPIN	0.170561	16.1168	1.37115	-5.06203	0.172608	0.626125	0.203339
1h post exercise	MICE	CCT5	-0.152342	18.2479	-1.37114	-5.06204	0.172611	0.626125	0.203339
1h post exercise	HIIE	MRPL48	0.146723	14.6615	1.37102	-5.06219	0.172644	0.626125	0.203339
1h post exercise	HIIE	OTULIN	0.131855	15.4143	1.37093	-5.0623	0.172671	0.626125	0.203339
1h post exercise	HIIE	LYRM4	0.261485	15.0225	1.37064	-5.06266	0.172765	0.626125	0.203339
1h post exercise	HIIE	RAB7A	0.120407	22.0363	1.37054	-5.06279	0.172793	0.626125	0.203339
1h post exercise	HIIE	ARHGEF18	0.187335	13.5664	1.37054	-5.0628	0.172796	0.626125	0.203339
1h post exercise	MICE	TBC1D10C	-0.266624	15.7397	-1.3705	-5.06284	0.172808	0.626125	0.203339
1h post exercise	HIIE	SPARC	0.249364	18.4389	1.37023	-5.06319	0.172894	0.626125	0.203339
1h post exercise	MICE	SHARPIN	-0.251532	13.0681	-1.37018	-5.06325	0.172908	0.626125	0.203339
1h post exercise	MICE	EIF1AY	-0.333633	15.0322	-1.36998	-5.0635	0.17297	0.626125	0.203339
1h post exercise	HIIE	TBCA	0.165049	17.3802	1.36993	-5.06357	0.172986	0.626125	0.203339
1h post exercise	HIIE	MRPL33	0.184061	14.3016	1.36981	-5.06372	0.173023	0.626125	0.203339
1h post exercise	HIIE	PREB	0.113892	17.9328	1.3698	-5.06374	0.173025	0.626125	0.203339
1h post exercise	HIIE	IRAK3	0.145578	14.1344	1.36974	-5.06381	0.173043	0.626125	0.203339
1h post exercise	MICE	RAC3	-0.47158	21.1491	-1.36933	-5.06433	0.173173	0.626125	0.203339
1h post exercise	HIIE	ESAM	0.250976	18.0026	1.36892	-5.06485	0.173301	0.626125	0.203339
1h post exercise	HIIE	RAD21	0.214083	14.9294	1.3681	-5.06588	0.173557	0.626125	0.203339
1h post exercise	HIIE	MPG	0.274978	14.742	1.3679	-5.06614	0.17362	0.626125	0.203339
1h post exercise	MICE	FUBP3	-0.179413	15.0568	-1.36776	-5.06632	0.173664	0.626125	0.203339
1h post exercise	HIIE	RABGGTA	0.0721398	16.5365	1.36775	-5.06632	0.173662	0.626125	0.203339
1h post exercise	MICE	SNX9	-0.140106	16.8169	-1.36732	-5.06687	0.173799	0.626236	0.203262
1h post exercise	MICE	ARMCX3	-0.182299	16.7686	-1.36579	-5.0688	0.174279	0.62718	0.202608
1h post exercise	MICE	CMC4	-0.372607	13.9955	-1.3656	-5.06904	0.174338	0.62718	0.202608
1h post exercise	HIIE	POLR2D	0.348512	12.3969	1.36549	-5.06918	0.174372	0.62718	0.202608
1h post exercise	HIIE	PGRMC2	0.182747	17.5558	1.36495	-5.06987	0.174543	0.627419	0.202443
1h post exercise	HIIE	BLTP2	0.1069	14.0345	1.36319	-5.07209	0.175093	0.629023	0.201333
1h post exercise	HIIE	PLBD1	0.358944	16.8747	1.36236	-5.07313	0.175357	0.629595	0.200939
1h post exercise	MICE	PTPN2	-0.219537	14.3187	-1.36102	-5.07482	0.175779	0.630714	0.200167
1h post exercise	HIIE	SEPTIN7	0.105887	20.7655	1.3607	-5.07523	0.175877	0.630714	0.200167
1h post exercise	MICE	UTP14A	-0.281871	12.8296	-1.35974	-5.07643	0.176181	0.630894	0.200044
1h post exercise	HIIE	OSBPL5	0.294699	12.3228	1.35963	-5.07657	0.176217	0.630894	0.200044
1h post exercise	MICE	SARS1	-0.0865506	19.2955	-1.35944	-5.07681	0.176275	0.630894	0.200044
1h post exercise	HIIE	RPF1	0.382913	12.1784	1.35923	-5.07708	0.176345	0.630894	0.200044
1h post exercise	HIIE	CD68	0.185323	16.6364	1.35837	-5.07815	0.176615	0.631485	0.199637
1h post exercise	HIIE	OLFM4	0.681712	14.1543	1.35776	-5.07892	0.176808	0.631802	0.199419
1h post exercise	HIIE	ITM2B	0.246144	14.5859	1.357	-5.07988	0.177051	0.632295	0.19908
1h post exercise	HIIE	MOB3C	0.166713	16.7297	1.35452	-5.08299	0.177836	0.634463	0.197594
1h post exercise	HIIE	H1-0	0.348385	17.4683	1.35438	-5.08317	0.177882	0.634463	0.197594
1h post exercise	HIIE	CLEC1B	0.247453	17.9334	1.35394	-5.08372	0.178023	0.634463	0.197594
1h post exercise	MICE	COPB1	-0.0900068	18.6214	-1.35375	-5.08395	0.178078	0.634463	0.197594
1h post exercise	HIIE	SUMF2	0.200725	15.1096	1.3531	-5.08477	0.17829	0.634844	0.197333
1h post exercise	MICE	LAT	-0.264563	14.0369	-1.35219	-5.0859	0.178578	0.634953	0.197259
1h post exercise	HIIE	NFE2	0.191599	14.8878	1.35192	-5.08624	0.178664	0.634953	0.197259
1h post exercise	HIIE	CD14	0.302557	16.3651	1.35187	-5.08631	0.178682	0.634953	0.197259
1h post exercise	HIIE	CDK16	0.189122	13.09	1.35167	-5.08656	0.178741	0.634953	0.197259
1h post exercise	HIIE	GMDS	0.108904	16.0141	1.35077	-5.08768	0.17903	0.635072	0.197177
1h post exercise	HIIE	GOLIM4	0.162116	14.1254	1.35066	-5.08782	0.179065	0.635072	0.197177
1h post exercise	MICE	RAB20	-0.189689	14.2741	-1.35026	-5.08832	0.179195	0.635072	0.197177
1h post exercise	MICE	HNRNPA0	-0.198657	17.7638	-1.35026	-5.08832	0.179196	0.635072	0.197177
1h post exercise	MICE	ARB2A	-0.220848	13.7747	-1.34992	-5.08874	0.179304	0.635085	0.197168
1h post exercise	HIIE	LY75	0.168388	15.0471	1.34867	-5.09031	0.179706	0.636133	0.196452
1h post exercise	HIIE	PAFAH1B1	0.0996042	18.357	1.34789	-5.09128	0.179951	0.636402	0.196269
1h post exercise	MICE	FLAD1	-0.169917	15.5643	-1.34777	-5.09142	0.179992	0.636402	0.196269
1h post exercise	MICE	MRPS25	-0.173276	13.2971	-1.34696	-5.09244	0.18025	0.636914	0.195919
1h post exercise	MICE	NCALD	-0.398346	12.7397	-1.34667	-5.09281	0.180348	0.636914	0.195919
1h post exercise	HIIE	EHMT2	0.299086	12.6682	1.34596	-5.09369	0.180577	0.637348	0.195623
1h post exercise	HIIE	GPKOW	0.278433	13.5531	1.34551	-5.09425	0.180721	0.637484	0.195531
1h post exercise	HIIE	COMMD6	0.280836	14.2906	1.34494	-5.09495	0.180903	0.637753	0.195347
1h post exercise	MICE	RCAN2	-1.05889	10.2489	-1.34418	-5.0959	0.181148	0.638244	0.195013
Post exercise	HIIE	GNG10	0.645815	14.9355	2.93597	-2.00907	0.00391105	0.638347	0.194943
1h post exercise	HIIE	UGGT1	0.0814252	19.4115	1.34365	-5.09656	0.181316	0.638453	0.194871
1h post exercise	HIIE	TRIM3	0.182188	12.7806	1.34307	-5.09729	0.181505	0.638453	0.194871
1h post exercise	HIIE	TBC1D15	0.0840282	17.7321	1.34301	-5.09736	0.181524	0.638453	0.194871
1h post exercise	MICE	DNAH1	-0.520221	12.5536	-1.34244	-5.09807	0.181711	0.638738	0.194677
1h post exercise	HIIE	TF	0.233598	19.7876	1.34185	-5.09879	0.1819	0.638946	0.194536
1h post exercise	HIIE	ANTXR2	0.210267	13.8539	1.34135	-5.09942	0.182062	0.638946	0.194536
1h post exercise	HIIE	ZNF787	0.264415	12.8842	1.34126	-5.09954	0.182094	0.638946	0.194536
1h post exercise	HIIE	AMT	0.157694	14.3007	1.34094	-5.09993	0.182193	0.638946	0.194536
1h post exercise	HIIE	NFKBIA	0.26471	13.2308	1.34016	-5.1009	0.18245	0.639203	0.194361
1h post exercise	HIIE	UNC93B1	0.312216	13.3299	1.34007	-5.10101	0.182478	0.639203	0.194361
1h post exercise	HIIE	MAN1A2	0.17106	12.9155	1.33973	-5.10143	0.182584	0.639204	0.19436
1h post exercise	MICE	ITPR3	-0.142016	16.9076	-1.33874	-5.10266	0.182909	0.639971	0.19384
1h post exercise	MICE	CCT2	-0.169521	17.874	-1.33783	-5.10378	0.183203	0.640535	0.193457
1h post exercise	HIIE	PRDX3	0.10467	20.3263	1.33735	-5.10437	0.183357	0.640535	0.193457
1h post exercise	MICE	THBS1	-0.224933	25.41	-1.33705	-5.10475	0.18346	0.640535	0.193457
1h post exercise	MICE	RAP1GAP2	-0.0997703	18.7072	-1.33693	-5.1049	0.183495	0.640535	0.193457
1h post exercise	MICE	PAM	-0.23999	13.0155	-1.33544	-5.10674	0.183983	0.641635	0.192712
1h post exercise	MICE	C7orf50	-0.259246	14.402	-1.33498	-5.1073	0.184133	0.641635	0.192712
1h post exercise	HIIE	DYNLT3	0.428721	13.5714	1.33475	-5.10759	0.184209	0.641635	0.192712
1h post exercise	MICE	GP5	-0.260026	20.5985	-1.3346	-5.10778	0.184259	0.641635	0.192712
1h post exercise	HIIE	SELENOW	0.328715	13.1295	1.33434	-5.10809	0.184341	0.641635	0.192712
1h post exercise	HIIE	MYO6	0.234593	13.2049	1.3337	-5.10889	0.184551	0.64175	0.192634
1h post exercise	MICE	FDPS	-0.0995587	18.6141	-1.33355	-5.10907	0.184597	0.64175	0.192634
1h post exercise	HIIE	MLKL	0.120896	15.6707	1.33326	-5.10943	0.184693	0.64175	0.192634
1h post exercise	HIIE	MGAT5	0.15919	13.8238	1.3329	-5.10987	0.184809	0.641784	0.192611
1h post exercise	MICE	TUBA8	-0.278889	21.5858	-1.33234	-5.11057	0.184997	0.642066	0.19242
1h post exercise	HIIE	TPI1	0.13324	21.7817	1.33137	-5.11176	0.185313	0.642796	0.191927
1h post exercise	HIIE	ARSD	0.245567	19.1561	1.32977	-5.11374	0.185841	0.644257	0.190941
1h post exercise	MICE	NUBP2	-0.192158	15.1398	-1.32938	-5.11421	0.185969	0.644328	0.190893
1h post exercise	HIIE	POFUT1	0.118863	14.4546	1.32823	-5.11563	0.186343	0.644423	0.190829
1h post exercise	HIIE	MYD88	0.117408	15.1839	1.32799	-5.11593	0.186423	0.644423	0.190829
1h post exercise	HIIE	TLR2	0.279678	15.2797	1.32703	-5.1171	0.186742	0.644423	0.190829
1h post exercise	HIIE	HSD17B10	0.11522	19.0909	1.32697	-5.11718	0.186761	0.644423	0.190829
1h post exercise	MICE	ACSF3	-0.122648	15.8528	-1.32692	-5.11724	0.186777	0.644423	0.190829
1h post exercise	HIIE	C7	0.224791	15.3085	1.32621	-5.11811	0.187013	0.644423	0.190829
1h post exercise	HIIE	MOB3A	0.156805	14.1742	1.3262	-5.11812	0.187014	0.644423	0.190829
1h post exercise	MICE	TNFAIP8	-0.181272	13.8184	-1.32613	-5.11821	0.187038	0.644423	0.190829
1h post exercise	HIIE	YPEL5	0.173234	13.5751	1.32548	-5.11901	0.187253	0.644423	0.190829
1h post exercise	HIIE	NDUFA11	0.197225	15.5441	1.32511	-5.11945	0.187376	0.644423	0.190829
1h post exercise	HIIE	RMDN1	0.0987894	16.5466	1.32474	-5.11991	0.187496	0.644423	0.190829
1h post exercise	HIIE	CREB1	0.266602	17.2803	1.32471	-5.11996	0.187511	0.644423	0.190829
1h post exercise	MICE	EIF4G2	-0.14408	17.4705	-1.32454	-5.12015	0.187564	0.644423	0.190829
1h post exercise	HIIE	MIA2	0.174058	13.0364	1.32426	-5.1205	0.187655	0.644423	0.190829
1h post exercise	MICE	TBK1	-0.139083	15.7812	-1.32418	-5.1206	0.187683	0.644423	0.190829
1h post exercise	HIIE	GSTM3	0.211303	17.2754	1.32412	-5.12067	0.187703	0.644423	0.190829
1h post exercise	MICE	FAHD2A	-0.16663	15.6104	-1.32361	-5.1213	0.187875	0.644646	0.190679
1h post exercise	HIIE	PARN	0.221636	16.6168	1.32326	-5.12172	0.187988	0.644669	0.190663
1h post exercise	HIIE	CDK13	0.268243	13.4256	1.32236	-5.12284	0.18829	0.645327	0.19022
1h post exercise	HIIE	ANXA2	0.540684	20.0122	1.32193	-5.12336	0.188431	0.645327	0.19022
1h post exercise	MICE	NSDHL	-0.106178	16.9464	-1.32124	-5.1242	0.188657	0.645327	0.19022
1h post exercise	HIIE	MRPL49	0.163423	15.0215	1.32081	-5.12473	0.188803	0.645327	0.19022
1h post exercise	HIIE	TRAM1	0.133834	17.2216	1.32058	-5.12501	0.188879	0.645327	0.19022
1h post exercise	HIIE	AP3D1	0.0972501	17.5263	1.3203	-5.12535	0.188968	0.645327	0.19022
1h post exercise	HIIE	MTCH2	0.181524	18.5192	1.31983	-5.12593	0.18913	0.645327	0.19022
1h post exercise	HIIE	SERPINA7	0.271657	13.6618	1.31968	-5.12611	0.189179	0.645327	0.19022
1h post exercise	HIIE	CMC2	0.426025	15.0444	1.31939	-5.12646	0.189276	0.645327	0.19022
1h post exercise	HIIE	TGFBI	0.208125	16.2593	1.31919	-5.12671	0.189343	0.645327	0.19022
1h post exercise	HIIE	COX4I1	0.156852	20.006	1.31915	-5.12676	0.189356	0.645327	0.19022
1h post exercise	MICE	TOR4A	-0.201719	19.8777	-1.3186	-5.12743	0.189541	0.645339	0.190212
1h post exercise	MICE	DIDO1	-0.185733	14.9093	-1.3185	-5.12755	0.189573	0.645339	0.190212
1h post exercise	HIIE	PRDM10	0.316767	12.7486	1.3176	-5.12864	0.189872	0.645485	0.190114
1h post exercise	MICE	PSMG3	-0.212122	13.3556	-1.31745	-5.12883	0.189922	0.645485	0.190114
1h post exercise	MICE	USF1	-0.218202	13.971	-1.31741	-5.12888	0.189937	0.645485	0.190114
1h post exercise	HIIE	RABGGTB	0.142284	14.814	1.31694	-5.12945	0.190091	0.645646	0.190006
1h post exercise	HIIE	AP4M1	0.118962	14.2555	1.31654	-5.12994	0.190225	0.645739	0.189943
1h post exercise	HIIE	GATAD2B	0.193362	14.7841	1.31608	-5.1305	0.19038	0.645902	0.189833
1h post exercise	MICE	PLEKHF1	-0.341908	13.82	-1.31477	-5.13209	0.190819	0.647026	0.189078
1h post exercise	HIIE	NAGLU	0.105933	16.2089	1.31421	-5.13278	0.191004	0.647088	0.189037
1h post exercise	MICE	IST1	-0.0818557	17.4609	-1.31383	-5.13324	0.191131	0.647088	0.189037
1h post exercise	MICE	LMF2	-0.134192	15.7501	-1.3133	-5.13389	0.191312	0.647088	0.189037
1h post exercise	HIIE	UXT	0.179456	14.403	1.31308	-5.13415	0.191387	0.647088	0.189037
1h post exercise	MICE	PACS2	-0.243992	13.8903	-1.31276	-5.13454	0.191494	0.647088	0.189037
1h post exercise	HIIE	PPCDC	0.226549	13.3894	1.31228	-5.13512	0.191655	0.647088	0.189037
1h post exercise	HIIE	PARP4	0.163172	14.8914	1.31219	-5.13524	0.191687	0.647088	0.189037
1h post exercise	HIIE	NAGK	0.215973	18.8226	1.31217	-5.13526	0.191694	0.647088	0.189037
1h post exercise	HIIE	COX6C	0.165973	17.0429	1.31096	-5.13673	0.192101	0.648099	0.188358
1h post exercise	MICE	TRADD	-0.145635	15.3543	-1.30976	-5.13818	0.192502	0.649091	0.187694
1h post exercise	HIIE	MANF	0.21278	19.0183	1.30925	-5.1388	0.192678	0.649319	0.187542
1h post exercise	HIIE	TRAPPC5	0.0891252	16.7467	1.30808	-5.14022	0.19307	0.650128	0.187001
1h post exercise	HIIE	TARS1	0.0972588	18.8804	1.30787	-5.14048	0.193141	0.650128	0.187001
1h post exercise	HIIE	OCRL	0.154862	14.6092	1.30686	-5.1417	0.193483	0.650128	0.187001
1h post exercise	HIIE	MCM2	0.208958	14.9236	1.30678	-5.1418	0.193513	0.650128	0.187001
1h post exercise	HIIE	MRPL55	0.193156	15.3069	1.30678	-5.1418	0.193514	0.650128	0.187001
1h post exercise	MICE	NFATC2IP	-0.169709	13.5834	-1.30662	-5.14199	0.193564	0.650128	0.187001
1h post exercise	HIIE	MALSU1	0.272234	11.7227	1.30628	-5.14241	0.193684	0.650171	0.186973
1h post exercise	MICE	NUBPL	-0.212306	13.6417	-1.30546	-5.14339	0.193959	0.6503	0.186886
1h post exercise	HIIE	MTMR3	0.292724	13.9761	1.30522	-5.14369	0.194043	0.6503	0.186886
1h post exercise	HIIE	CUTC	0.32258	14.1042	1.30521	-5.1437	0.194046	0.6503	0.186886
1h post exercise	MICE	DPP7	-0.185304	17.2905	-1.30407	-5.14507	0.194431	0.651106	0.186348
1h post exercise	HIIE	POLR2C	0.274546	14.0298	1.30387	-5.14532	0.194502	0.651106	0.186348
1h post exercise	MICE	PANX1	-0.230805	15.8326	-1.30318	-5.14614	0.194734	0.651199	0.186286
1h post exercise	HIIE	RPS27A	0.105716	22.5721	1.30314	-5.14619	0.194745	0.651199	0.186286
1h post exercise	MICE	HS1BP3	-0.120651	15.6001	-1.30279	-5.14663	0.194867	0.651245	0.186255
1h post exercise	HIIE	STAB1	0.175446	14.3247	1.30193	-5.14766	0.195161	0.651711	0.185945
1h post exercise	MICE	SNTB1	-0.232243	17.6894	-1.30119	-5.14855	0.195414	0.651711	0.185945
1h post exercise	MICE	FARS2	-0.149089	14.4257	-1.30118	-5.14856	0.195414	0.651711	0.185945
1h post exercise	MICE	NBEAL2	-0.165559	18.4569	-1.30086	-5.14895	0.195527	0.651711	0.185945
1h post exercise	MICE	YIPF6	-0.221846	15.1136	-1.30078	-5.14905	0.195555	0.651711	0.185945
1h post exercise	MICE	TYMP	-0.273448	19.3371	-1.30049	-5.1494	0.195654	0.651711	0.185945
1h post exercise	MICE	DARS1	-0.165373	19.5295	-1.29955	-5.15052	0.195973	0.652416	0.185475
1h post exercise	MICE	IDH3A	-0.207884	17.7923	-1.29779	-5.15265	0.196578	0.653284	0.184898
1h post exercise	HIIE	EIF4H	0.120842	18.8718	1.29724	-5.1533	0.196763	0.653284	0.184898
1h post exercise	HIIE	EMP3	0.539562	14.048	1.2971	-5.15347	0.196814	0.653284	0.184898
1h post exercise	MICE	PPP1R14A	-0.264513	16.8172	-1.29696	-5.15364	0.196861	0.653284	0.184898
1h post exercise	HIIE	KRT1	0.52294	12.735	1.29681	-5.15382	0.196912	0.653284	0.184898
1h post exercise	HIIE	CASP1	0.238622	16.9505	1.2967	-5.15395	0.196949	0.653284	0.184898
1h post exercise	HIIE	ETF1	0.0646246	18.7179	1.29657	-5.15411	0.196991	0.653284	0.184898
1h post exercise	HIIE	NDUFB6	0.175872	14.4494	1.29609	-5.15469	0.197161	0.653488	0.184762
1h post exercise	HIIE	BLMH	0.112341	16.7231	1.29557	-5.15531	0.197335	0.653551	0.184721
1h post exercise	HIIE	GPX7	0.220715	14.8864	1.2954	-5.15551	0.197396	0.653551	0.184721
1h post exercise	HIIE	EDC4	0.115579	16.1678	1.29399	-5.1572	0.197878	0.654787	0.1839
1h post exercise	MICE	TMEM175	-0.276246	12.9608	-1.29339	-5.15792	0.198088	0.654856	0.183854
1h post exercise	MICE	ALDH16A1	-0.194067	16.6372	-1.29331	-5.15802	0.198116	0.654856	0.183854
1h post exercise	MICE	EIF1	-0.223833	16.3498	-1.2923	-5.15923	0.198466	0.655656	0.183324
1h post exercise	MICE	TRIP4	-0.133231	14.897	-1.29129	-5.16044	0.198812	0.656437	0.182807
1h post exercise	HIIE	RBPJ	0.250799	14.246	1.29074	-5.1611	0.199005	0.656717	0.182621
1h post exercise	HIIE	VTA1	0.0940617	16.8083	1.29037	-5.16153	0.199128	0.656762	0.182592
1h post exercise	MICE	NAPB	-0.378322	14.2465	-1.28898	-5.1632	0.199615	0.657699	0.181973
1h post exercise	HIIE	WDR7	0.137221	14.7367	1.28863	-5.16362	0.199732	0.657699	0.181973
1h post exercise	HIIE	PPP1R2	0.264083	12.4843	1.28862	-5.16363	0.199738	0.657699	0.181973
1h post exercise	MICE	PLIN3	-0.216193	14.7233	-1.28815	-5.16419	0.199901	0.657874	0.181857
1h post exercise	MICE	SAV1	-0.210572	10.4063	-1.28779	-5.16462	0.200024	0.657921	0.181826
1h post exercise	HIIE	FRYL	0.0793871	15.2702	1.28713	-5.1654	0.200251	0.65831	0.18157
1h post exercise	HIIE	RAB3D	0.192497	15.7163	1.28596	-5.1668	0.200661	0.659249	0.180951
1h post exercise	MICE	GPN1	-0.249367	13.7548	-1.28386	-5.1693	0.201394	0.659249	0.180951
1h post exercise	HIIE	CHORDC1	0.100037	15.9546	1.28381	-5.16936	0.201409	0.659249	0.180951
1h post exercise	HIIE	ICAM1	0.269507	14.1036	1.28312	-5.17018	0.201653	0.659249	0.180951
1h post exercise	MICE	SLTM	-0.190629	15.0772	-1.28307	-5.17024	0.201669	0.659249	0.180951
1h post exercise	MICE	ATP5PD	-0.20023	14.9655	-1.28278	-5.17059	0.201772	0.659249	0.180951
1h post exercise	MICE	ASMTL	-0.160969	15.3463	-1.28256	-5.17084	0.201847	0.659249	0.180951
1h post exercise	HIIE	MTX2	0.180653	15.9872	1.28214	-5.17134	0.201994	0.659249	0.180951
1h post exercise	HIIE	CDC42	0.0738028	21.702	1.28204	-5.17147	0.202027	0.659249	0.180951
1h post exercise	MICE	DGKA	-0.126299	16.9236	-1.28173	-5.17184	0.202137	0.659249	0.180951
1h post exercise	HIIE	MFGE8	0.23666	13.2941	1.28156	-5.17203	0.202197	0.659249	0.180951
1h post exercise	HIIE	TMEM87B	0.293473	14.9174	1.28112	-5.17255	0.20235	0.659249	0.180951
1h post exercise	MICE	UBE2H	-0.227033	16.0039	-1.28096	-5.17275	0.202407	0.659249	0.180951
1h post exercise	HIIE	RALB	0.141793	18.1779	1.28089	-5.17283	0.202432	0.659249	0.180951
1h post exercise	MICE	PSMD13	-0.131352	17.2205	-1.28088	-5.17284	0.202434	0.659249	0.180951
1h post exercise	HIIE	POGLUT3	0.126672	14.8624	1.28079	-5.17294	0.202463	0.659249	0.180951
1h post exercise	HIIE	IGHV3-72	0.164879	17.0163	1.28066	-5.1731	0.202512	0.659249	0.180951
1h post exercise	HIIE	VPS51	0.110996	15.3822	1.28059	-5.17319	0.202536	0.659249	0.180951
1h post exercise	MICE	TRIR	-0.281788	13.4267	-1.28025	-5.17359	0.202657	0.659249	0.180951
1h post exercise	MICE	DUSP23	-0.289652	15.48	-1.28007	-5.1738	0.20272	0.659249	0.180951
1h post exercise	MICE	DCUN1D1	-0.111313	15.0693	-1.27905	-5.17502	0.203075	0.659346	0.180887
1h post exercise	MICE	CDK5	-0.133077	15.3544	-1.27875	-5.17537	0.20318	0.659346	0.180887
1h post exercise	HIIE	MYL6	0.441235	21.5066	1.2786	-5.17555	0.203236	0.659346	0.180887
1h post exercise	HIIE	S100A11	0.242735	17.93	1.2781	-5.17613	0.20341	0.659346	0.180887
1h post exercise	HIIE	DCTN4	0.0711177	16.9489	1.27731	-5.17708	0.203686	0.659346	0.180887
1h post exercise	HIIE	PRAF2	0.177538	17.5883	1.27731	-5.17708	0.203691	0.659346	0.180887
1h post exercise	MICE	UBLCP1	-0.198299	15.7932	-1.27698	-5.17746	0.203805	0.659346	0.180887
1h post exercise	HIIE	GBA1	0.138756	15.2444	1.27671	-5.17779	0.203898	0.659346	0.180887
1h post exercise	HIIE	ARCN1	0.0569853	19.5009	1.2767	-5.1778	0.203902	0.659346	0.180887
1h post exercise	HIIE	COPB2	0.0735126	19.8889	1.27658	-5.17794	0.203942	0.659346	0.180887
1h post exercise	HIIE	RP2	0.104193	17.802	1.27627	-5.17831	0.204053	0.659346	0.180887
1h post exercise	HIIE	ABHD12	0.0826903	15.729	1.27625	-5.17833	0.20406	0.659346	0.180887
1h post exercise	MICE	ARID4B	-0.350295	12.7182	-1.27573	-5.17895	0.204247	0.659467	0.180807
1h post exercise	HIIE	S100P	0.460209	13.3738	1.27553	-5.17918	0.204316	0.659467	0.180807
1h post exercise	HIIE	CUL1	0.119466	15.9394	1.2741	-5.18087	0.204819	0.660108	0.180385
1h post exercise	HIIE	DNASE2	0.191842	15.5593	1.27336	-5.18175	0.205083	0.660108	0.180385
1h post exercise	HIIE	RGL2	0.164289	13.2711	1.2731	-5.18205	0.205172	0.660108	0.180385
1h post exercise	HIIE	TMEM192	0.180704	15.0564	1.27277	-5.18244	0.205292	0.660108	0.180385
1h post exercise	HIIE	TRIM14	0.225675	13.4881	1.27256	-5.18268	0.205364	0.660108	0.180385
1h post exercise	MICE	DNAJC10	-0.0904749	16.3818	-1.27199	-5.18336	0.205563	0.660108	0.180385
1h post exercise	HIIE	SLIT1	0.219305	16.7054	1.27169	-5.18371	0.205673	0.660108	0.180385
1h post exercise	HIIE	ZFX	0.30056	13.5842	1.27148	-5.18395	0.205746	0.660108	0.180385
1h post exercise	HIIE	RNASET2	0.215296	15.3547	1.27134	-5.18412	0.205796	0.660108	0.180385
1h post exercise	HIIE	CTSZ	0.23637	17.616	1.2713	-5.18418	0.205813	0.660108	0.180385
1h post exercise	HIIE	RAD23B	0.170155	18.1901	1.27129	-5.18418	0.205816	0.660108	0.180385
1h post exercise	HIIE	LBP	0.45823	15.2615	1.27126	-5.18422	0.205826	0.660108	0.180385
Post exercise	MICE	SPAG7	-0.561058	14.6875	-2.91591	-2.0546	0.0041552	0.660349	0.180226
1h post exercise	HIIE	TMLHE	0.162391	15.0555	1.27015	-5.18553	0.206221	0.661022	0.179784
1h post exercise	HIIE	AKR1B1	0.150113	19.0786	1.26886	-5.18705	0.206679	0.66214	0.17905
1h post exercise	MICE	TAB1	-0.113964	15.6699	-1.26816	-5.18786	0.206922	0.662569	0.178769
1h post exercise	MICE	TLN1	-0.250027	24.2437	-1.26743	-5.18872	0.207187	0.663064	0.178444
1h post exercise	HIIE	NIP7	0.2746	13.8115	1.26578	-5.19066	0.207776	0.664348	0.177605
1h post exercise	MICE	CLIC4	-0.199795	17.7348	-1.26569	-5.19077	0.207808	0.664348	0.177605
1h post exercise	HIIE	FBP1	0.288984	16.8217	1.26523	-5.19131	0.207973	0.664523	0.17749
1h post exercise	HIIE	PPP2CA	0.131513	17.5027	1.2648	-5.19181	0.208123	0.664651	0.177406
1h post exercise	MICE	ADSL	-0.145647	16.2157	-1.26222	-5.19483	0.20905	0.667258	0.175706
1h post exercise	MICE	GIMAP1-GIMAP5	-0.207421	16.6461	-1.26133	-5.19587	0.209367	0.667707	0.175414
1h post exercise	MICE	UBA7	-0.155299	18.6256	-1.26121	-5.19601	0.209412	0.667707	0.175414
1h post exercise	HIIE	PLOD3	0.11371	16.4591	1.26049	-5.19686	0.209668	0.667978	0.175238
1h post exercise	HIIE	ESYT2	0.07789	19.1848	1.26035	-5.19702	0.209718	0.667978	0.175238
1h post exercise	MICE	ATP6	-0.313508	17.9906	-1.25983	-5.19762	0.209907	0.668137	0.175134
1h post exercise	HIIE	ZMAT2	0.449496	12.9551	1.25927	-5.19829	0.210111	0.668137	0.175134
1h post exercise	HIIE	SLC33A1	0.105749	15.4666	1.25897	-5.19863	0.210213	0.668137	0.175134
1h post exercise	HIIE	CORO1C	0.128191	22.2735	1.25819	-5.19954	0.210496	0.668137	0.175134
1h post exercise	HIIE	TMBIM6	0.282537	14.7705	1.25766	-5.20016	0.210691	0.668137	0.175134
1h post exercise	MICE	SIN3A	-0.193813	15.1317	-1.25722	-5.20068	0.21085	0.668137	0.175134
1h post exercise	MICE	GNL2	-0.304751	14.2566	-1.25714	-5.20076	0.210876	0.668137	0.175134
1h post exercise	HIIE	UBE2V1	0.0958876	20.7675	1.25704	-5.20089	0.210911	0.668137	0.175134
1h post exercise	MICE	SMPD1	-0.22788	12.2299	-1.2565	-5.20151	0.211108	0.668137	0.175134
1h post exercise	HIIE	COPA	0.0512093	20.0582	1.25615	-5.20192	0.211232	0.668137	0.175134
1h post exercise	MICE	MAP2K1	-0.170316	16.2716	-1.25605	-5.20204	0.211271	0.668137	0.175134
1h post exercise	MICE	MGAT4B	-0.23821	13.6663	-1.25569	-5.20245	0.2114	0.668137	0.175134
1h post exercise	HIIE	C1QC	0.338636	14.02	1.25562	-5.20253	0.211425	0.668137	0.175134
1h post exercise	MICE	PXMP4	-0.150884	12.8831	-1.25549	-5.20269	0.211472	0.668137	0.175134
1h post exercise	HIIE	ITGA2B	0.147014	25.6874	1.25473	-5.20357	0.211746	0.668137	0.175134
1h post exercise	HIIE	ITGA2	0.181844	19.6077	1.25445	-5.2039	0.21185	0.668137	0.175134
1h post exercise	MICE	C3orf38	-0.492668	12.8731	-1.25435	-5.20402	0.211887	0.668137	0.175134
1h post exercise	HIIE	PGLYRP1	0.624151	13.0616	1.25434	-5.20403	0.21189	0.668137	0.175134
1h post exercise	MICE	ABI2	-0.259731	16.7895	-1.25397	-5.20446	0.212024	0.668137	0.175134
1h post exercise	HIIE	ELAC2	0.220522	14.2731	1.2536	-5.20489	0.212159	0.668137	0.175134
1h post exercise	MICE	FMNL1	-0.175858	16.1469	-1.25333	-5.2052	0.212257	0.668137	0.175134
1h post exercise	HIIE	VPS28	0.177372	15.4858	1.25277	-5.20585	0.212458	0.668137	0.175134
1h post exercise	HIIE	PRKCB	0.131032	19.6988	1.25275	-5.20587	0.212464	0.668137	0.175134
1h post exercise	HIIE	MIGA2	0.320115	13.6237	1.25272	-5.2059	0.212476	0.668137	0.175134
1h post exercise	HIIE	PGM1	0.0998773	19.2699	1.2523	-5.2064	0.212627	0.668137	0.175134
1h post exercise	MICE	PDE3A	-0.224014	16.7926	-1.25226	-5.20644	0.212644	0.668137	0.175134
1h post exercise	HIIE	CEP120	0.29936	12.006	1.25128	-5.20758	0.212999	0.668765	0.174727
1h post exercise	HIIE	PHKA2	0.0880121	15.493	1.25109	-5.2078	0.213066	0.668765	0.174727
1h post exercise	MICE	LRRC8D	-0.141333	16.1271	-1.25035	-5.20866	0.213339	0.668864	0.174662
1h post exercise	MICE	RRP1B	-0.171158	14.6945	-1.2502	-5.20883	0.213392	0.668864	0.174662
1h post exercise	HIIE	EXOSC9	0.209079	15.6572	1.24983	-5.20926	0.213527	0.668864	0.174662
1h post exercise	HIIE	CPNE3	0.195197	19.657	1.24936	-5.20981	0.213699	0.668864	0.174662
1h post exercise	MICE	F8A1	-0.203828	14.6118	-1.24922	-5.20997	0.21375	0.668864	0.174662
1h post exercise	HIIE	TRAPPC1	0.0730268	16.9564	1.24918	-5.21002	0.213762	0.668864	0.174662
1h post exercise	MICE	PAPSS2	-0.18052	15.7737	-1.24796	-5.21142	0.214208	0.669813	0.174047
1h post exercise	HIIE	GLA	0.141163	15.2916	1.24729	-5.2122	0.214452	0.669813	0.174047
1h post exercise	HIIE	BPI	0.564145	14.4677	1.24721	-5.2123	0.214485	0.669813	0.174047
1h post exercise	HIIE	DBT	0.0880085	16.6907	1.24713	-5.21239	0.214509	0.669813	0.174047
1h post exercise	HIIE	REPIN1	0.282036	11.6086	1.246	-5.2137	0.214927	0.670773	0.173424
1h post exercise	HIIE	SLC30A1	0.115629	15.5959	1.24547	-5.21431	0.215118	0.67102	0.173265
1h post exercise	MICE	FARSB	-0.0892883	17.5753	-1.24447	-5.21546	0.215482	0.671177	0.173163
1h post exercise	HIIE	SLC25A35	0.111492	14.3985	1.24446	-5.21548	0.215488	0.671177	0.173163
1h post exercise	HIIE	CD82	0.312693	14.8794	1.24443	-5.21551	0.215501	0.671177	0.173163
1h post exercise	HIIE	CTSB	0.200233	17.5604	1.24384	-5.21619	0.215718	0.671505	0.172951
1h post exercise	HIIE	AK2	0.152506	19.7157	1.24339	-5.2167	0.215881	0.671668	0.172845
1h post exercise	MICE	CHCHD4	-0.264208	12.7392	-1.24183	-5.2185	0.216455	0.673018	0.171974
1h post exercise	HIIE	SIRT5	0.0882299	14.9709	1.2416	-5.21877	0.216538	0.673018	0.171974
1h post exercise	HIIE	CTCF	0.297191	13.4046	1.24088	-5.2196	0.216805	0.673034	0.171963
1h post exercise	HIIE	LIMD1	0.213333	13.6409	1.24048	-5.22005	0.216952	0.673034	0.171963
1h post exercise	HIIE	ABCD3	0.101784	15.3731	1.23974	-5.22091	0.217224	0.673034	0.171963
1h post exercise	MICE	GLRX3	-0.133662	18.029	-1.23943	-5.22127	0.217342	0.673034	0.171963
1h post exercise	HIIE	MCM3	0.215927	15.7558	1.23941	-5.22129	0.217348	0.673034	0.171963
1h post exercise	HIIE	CFD	0.236103	14.9069	1.23919	-5.22154	0.217429	0.673034	0.171963
1h post exercise	MICE	NDUFAF2	-0.166188	15.2059	-1.2381	-5.22279	0.217831	0.673034	0.171963
1h post exercise	HIIE	ARSA	0.181771	15.3152	1.23791	-5.22302	0.217903	0.673034	0.171963
1h post exercise	HIIE	HAUS8	0.266311	12.2057	1.23782	-5.22312	0.217935	0.673034	0.171963
1h post exercise	HIIE	SELL	0.354456	16.0784	1.23764	-5.22332	0.218	0.673034	0.171963
1h post exercise	HIIE	HLA-DQB1	0.252749	14.6994	1.2376	-5.22336	0.218015	0.673034	0.171963
1h post exercise	MICE	GUCY1B1	-0.196353	17.3938	-1.23748	-5.22351	0.218061	0.673034	0.171963
1h post exercise	MICE	TAPBP	-0.0888256	18.96	-1.23738	-5.22362	0.218093	0.673034	0.171963
1h post exercise	MICE	PRUNE1	-0.132215	18.3887	-1.23736	-5.22364	0.218103	0.673034	0.171963
1h post exercise	HIIE	ANO10	0.128184	17.1712	1.23623	-5.22494	0.218522	0.673623	0.171583
1h post exercise	MICE	MANEA	-0.271385	11.8463	-1.23607	-5.22513	0.218584	0.673623	0.171583
1h post exercise	MICE	CST7	-0.294858	14.6571	-1.23594	-5.22527	0.218629	0.673623	0.171583
1h post exercise	MICE	PDK1	-0.233635	16.7582	-1.23554	-5.22573	0.21878	0.67369	0.17154
[truncated: 10,079 more rows]

## Sheet: Group differences
Timepoint	Higher in	ID	log2FC	AveExpr	t	B	P.Value	adj.P.Val	log10.adj.pval
Post exercise	MICE	FAM118A	0.731175	11.6946	5.10115	4.91209	1.12e-06	0.00678	2.1688
Post exercise	HIIE	GRK4	-0.90336	12.8567	-4.58862	3.03658	1.01e-05	0.016553	1.78113
Post exercise	MICE	AAR2	0.535417	13.7345	4.57372	2.98409	1.07e-05	0.016553	1.78113
Post exercise	HIIE	VMA21	-0.65247	14.7105	-4.56876	2.96663	1.1e-05	0.016553	1.78113
Post exercise	MICE	GNB1L	0.629064	12.8752	4.44359	2.53071	1.83e-05	0.022099	1.65563
Post exercise	MICE	TCEAL3	0.62927	12.3349	4.19426	1.68853	4.93e-05	0.049641	1.30416
Post exercise	HIIE	IGHV4-61	-0.52674	14.3209	-4.14514	1.52687	5.97e-05	0.051492	1.28826
Post exercise	HIIE	GNG10	-0.63684	14.9355	-4.0944	1.36135	7.26e-05	0.054781	1.26137
Post exercise	HIIE	KLHDC4	-0.45463	12.7381	-4.0507	1.22029	8.57e-05	0.057527	1.24013
Post exercise	MICE	SERPINB2	0.666066	15.1303	3.99979	1.05683	0.000104	0.062818	1.20192
Post exercise	HIIE	SYTL2	-0.75049	11.4129	-3.91992	0.804003	0.00014	0.074916	1.12543
Post exercise	MICE	FGR	0.393343	15.9176	3.86418	0.629881	0.000173	0.074916	1.12543
Post exercise	MICE	HCK	0.442306	17.6067	3.85662	0.606421	0.000177	0.074916	1.12543
Post exercise	HIIE	FBLN5	-0.57778	15.3893	-3.83768	0.5478	0.00019	0.074916	1.12543
Post exercise	MICE	UBE2G1	0.421895	14.2689	3.82757	0.516609	0.000197	0.074916	1.12543
Post exercise	MICE	LRRK2	0.4848	13.0424	3.82598	0.511696	0.000198	0.074916	1.12543
Post exercise	HIIE	MZT2A	-0.58435	13.5413	-3.79267	0.409368	0.000224	0.079621	1.09897
Post exercise	MICE	ZRANB2	0.680946	14.5015	3.65579	-0.00368	0.000366	0.122937	0.910318
Post exercise	HIIE	REPS2	-0.47706	13.2734	-3.55313	-0.30547	0.000525	0.151179	0.820509
Post exercise	MICE	NARS1	0.190379	18.1572	3.54231	-0.33656	0.000545	0.151179	0.820509
Post exercise	HIIE	DNAAF5	-0.46888	12.2613	-3.53339	-0.36272	0.000563	0.151179	0.820509
Post exercise	MICE	NRDE2	0.660239	12.0406	3.5253	-0.38609	0.000578	0.151179	0.820509
Post exercise	MICE	TMEM101	0.451141	13.2477	3.46905	-0.54746	0.000702	0.151179	0.820509
Post exercise	MICE	PRAM1	0.460101	17.2176	3.46664	-0.55432	0.000708	0.151179	0.820509
Post exercise	MICE	RIOX2	0.666649	12.7219	3.43841	-0.63445	0.000779	0.151179	0.820509
Post exercise	MICE	TIMM17B	0.517873	13.6685	3.43045	-0.65697	0.0008	0.151179	0.820509
Post exercise	MICE	FNTA	0.281493	15.4734	3.42382	-0.67567	0.000818	0.151179	0.820509
Post exercise	HIIE	ACAP3	-0.81805	13.0471	-3.4236	-0.6763	0.000819	0.151179	0.820509
Post exercise	MICE	NFKBIA	0.473612	13.2308	3.41315	-0.7057	0.000848	0.151179	0.820509
Post exercise	HIIE	BET1	-0.46456	14.8481	-3.39699	-0.75106	0.000896	0.151179	0.820509
Post exercise	HIIE	BIRC2	-0.28145	12.9198	-3.37388	-0.81537	0.000968	0.151179	0.820509
Post exercise	MICE	IRAK3	0.251661	14.1344	3.3706	-0.82452	0.000978	0.151179	0.820509
Post exercise	MICE	ZFP91	0.590558	13.987	3.36708	-0.83455	0.00099	0.151179	0.820509
Post exercise	MICE	NCF2	0.47428	15.6841	3.3568	-0.86311	0.001025	0.151179	0.820509
Post exercise	HIIE	LIN7C	-0.39657	14.5905	-3.35679	-0.86312	0.001025	0.151179	0.820509
Post exercise	MICE	HMGB3	0.5522	17.0076	3.33871	-0.91316	0.001089	0.151179	0.820509
Post exercise	MICE	EBP	0.391152	17.3645	3.33551	-0.922	0.0011	0.151179	0.820509
Post exercise	MICE	ZBTB11	0.454209	12.8019	3.32945	-0.93871	0.001123	0.151179	0.820509
Post exercise	MICE	TNFAIP2	0.285636	14.5614	3.32907	-0.93963	0.001124	0.151179	0.820509
Post exercise	MICE	FCGR1A	0.542647	13.6569	3.32479	-0.95154	0.00114	0.151179	0.820509
Post exercise	MICE	EIF3D	0.193591	18.6132	3.32172	-0.95975	0.001151	0.151179	0.820509
Post exercise	HIIE	LOX	-0.7493	15.4265	-3.31975	-0.9654	0.001159	0.151179	0.820509
Post exercise	MICE	HEXB	0.265177	18.3324	3.31463	-0.97945	0.001179	0.151179	0.820509
Post exercise	HIIE	SLCO3A1	-0.2823	11.6613	-3.31095	-0.98933	0.001193	0.151179	0.820509
Post exercise	MICE	NAGA	0.284117	17.1846	3.30433	-1.00769	0.00122	0.151179	0.820509
Post exercise	HIIE	MBD3	-0.45721	11.9121	-3.30408	-1.00839	0.001221	0.151179	0.820509
Post exercise	MICE	HEXA	0.285995	17.5841	3.29961	-1.02061	0.001239	0.151179	0.820509
Post exercise	MICE	PAPSS1	0.208758	15.9722	3.299	-1.02206	0.001241	0.151179	0.820509
Post exercise	MICE	CES1	0.48394	17.7091	3.29522	-1.03262	0.001257	0.151179	0.820509
Post exercise	HIIE	SMIM1	-0.84693	15.606	-3.2914	-1.04304	0.001273	0.151179	0.820509
Post exercise	MICE	PGAM1	0.410744	20.2047	3.28275	-1.06662	0.001309	0.151179	0.820509
Post exercise	MICE	AAGAB	0.344137	13.7565	3.27131	-1.09773	0.00136	0.151179	0.820509
Post exercise	HIIE	MANEA	-0.50448	11.8463	-3.27074	-1.09927	0.001362	0.151179	0.820509
Post exercise	MICE	EED	0.440957	13.7761	3.26451	-1.11617	0.00139	0.151179	0.820509
Post exercise	MICE	ADAP1	0.429672	14.0617	3.26387	-1.11789	0.001393	0.151179	0.820509
Post exercise	MICE	DAZAP1	0.351019	17.3949	3.25931	-1.13024	0.001414	0.151179	0.820509
Post exercise	MICE	TRMT2A	0.426283	12.5704	3.2565	-1.13784	0.001427	0.151179	0.820509
Post exercise	MICE	GRK2	0.173307	18.3045	3.24803	-1.16053	0.001466	0.152687	0.816199
Post exercise	MICE	CELA3B	0.464759	19.7392	3.23799	-1.18779	0.001516	0.153045	0.81518
Post exercise	HIIE	BGN	-0.49243	14.4569	-3.23698	-1.19051	0.001521	0.153045	0.81518
Post exercise	MICE	ADA2	0.41898	16.8564	3.21619	-1.2463	0.001627	0.156819	0.804601
Post exercise	MICE	CTSB	0.363577	17.5604	3.21493	-1.24967	0.001633	0.156819	0.804601
Post exercise	MICE	JAML	0.590679	13.5138	3.21217	-1.25705	0.001648	0.156819	0.804601
Post exercise	HIIE	FOLR3	-0.59692	13.3935	-3.20651	-1.27218	0.001678	0.156819	0.804601
Post exercise	MICE	CPVL	0.332226	17.2822	3.19966	-1.29046	0.001716	0.156819	0.804601
Post exercise	MICE	LRP1	0.479197	14.1227	3.1957	-1.301	0.001738	0.156819	0.804601
Post exercise	MICE	TMEM168	0.385825	14.1152	3.19532	-1.30201	0.00174	0.156819	0.804601
Post exercise	MICE	POFUT1	0.199735	14.4546	3.17709	-1.35022	0.001844	0.163782	0.785734
Post exercise	MICE	COLGALT1	0.314171	17.1045	3.16296	-1.38779	0.00193	0.165247	0.781866
Post exercise	MICE	COMMD6	0.463973	14.2905	3.16294	-1.38783	0.00193	0.165247	0.781866
Post exercise	MICE	HK3	0.372199	16.4947	3.16091	-1.3932	0.001943	0.165247	0.781866
Post exercise	MICE	BUB3	0.368969	17.1071	3.14746	-1.42861	0.002028	0.170091	0.769318
Post exercise	HIIE	CDK14	-1.78428	11.9697	-3.13687	-1.45639	0.002097	0.173505	0.760689
Post exercise	MICE	MNDA	0.426333	18.0629	3.12332	-1.49185	0.002189	0.178676	0.747933
Post exercise	MICE	GAA	0.397847	15.825	3.11455	-1.51469	0.002251	0.180351	0.743882
Post exercise	HIIE	TMEM9B	-0.33894	15.3269	-3.10592	-1.53716	0.002313	0.180351	0.743882
Post exercise	HIIE	HAUS3	-0.38482	12.5395	-3.09896	-1.55522	0.002364	0.180351	0.743882
Post exercise	MICE	KLHL22	0.392139	12.8454	3.09657	-1.56143	0.002382	0.180351	0.743882
Post exercise	MICE	OTULINL	0.375472	17.147	3.09396	-1.56818	0.002402	0.180351	0.743882
Post exercise	HIIE	PEX14	-0.34096	14.6697	-3.0938	-1.56861	0.002403	0.180351	0.743882
Post exercise	MICE	MGST3	0.396174	16.7004	3.0917	-1.57403	0.002419	0.180351	0.743882
Post exercise	MICE	SPAG7	0.418412	14.6875	3.07528	-1.61643	0.002547	0.18602	0.730439
Post exercise	HIIE	CDKN2D	-0.59762	12.8989	-3.07406	-1.61959	0.002557	0.18602	0.730439
Post exercise	MICE	CTSS	0.501216	18.5684	3.06808	-1.63498	0.002605	0.187263	0.727548
Post exercise	MICE	POR	0.222614	15.8886	3.06013	-1.65531	0.00267	0.187263	0.727548
Post exercise	MICE	FGL2	0.452495	11.7603	3.05715	-1.66303	0.002695	0.187263	0.727548
Post exercise	MICE	POU2F1	0.397021	14.2201	3.05381	-1.67159	0.002723	0.187263	0.727548
Post exercise	HIIE	VPS37B	-0.42961	13.886	-3.05319	-1.67319	0.002729	0.187263	0.727548
Post exercise	HIIE	PEX6	-0.38023	11.828	-3.03401	-1.72208	0.002896	0.193958	0.712293
Post exercise	MICE	MYOF	0.4554	14.4587	3.03044	-1.73127	0.002929	0.193958	0.712293
Post exercise	MICE	KDM1A	0.29124	14.4858	3.02712	-1.73971	0.002959	0.193958	0.712293
Post exercise	MICE	SEH1L	0.260057	15.4388	3.02625	-1.74191	0.002967	0.193958	0.712293
Post exercise	HIIE	ARSD	-0.39232	19.1561	-3.02406	-1.74747	0.002987	0.193958	0.712293
Post exercise	HIIE	CLTCL1	-0.55591	12.4257	-3.02011	-1.75749	0.003024	0.194251	0.711638
Post exercise	MICE	RPL21	0.431839	16.7584	3.00018	-1.80793	0.003215	0.204388	0.689544
Post exercise	MICE	PIN4	0.336875	16.3093	2.99069	-1.83182	0.00331	0.205336	0.687535
Post exercise	MICE	MRPL39	0.230145	15.2834	2.98134	-1.85524	0.003406	0.205336	0.687535
Post exercise	MICE	RRP7A	0.620686	12.4417	2.97667	-1.86703	0.003456	0.205336	0.687535
Post exercise	MICE	ALDH3A2	0.200433	16.8662	2.96978	-1.88414	0.003528	0.205336	0.687535
Post exercise	MICE	RACK1	0.348382	18.9718	2.96499	-1.89624	0.003581	0.205336	0.687535
Post exercise	MICE	PDE12	0.161174	16.8072	2.95787	-1.91385	0.003659	0.205336	0.687535
Post exercise	MICE	EP300	0.345078	13.5451	2.95353	-1.92481	0.003708	0.205336	0.687535
Post exercise	HIIE	NRBF2	-0.50508	13.6525	-2.95336	-1.92523	0.00371	0.205336	0.687535
Post exercise	MICE	YTHDF3	0.235986	13.9382	2.94987	-1.93377	0.003749	0.205336	0.687535
Post exercise	MICE	DPYD	0.255103	17.7201	2.94503	-1.94593	0.003805	0.205336	0.687535
Post exercise	HIIE	GCSAML	-0.41021	12.9104	-2.94384	-1.9489	0.003819	0.205336	0.687535
Post exercise	MICE	VCAN	0.4538	16.6818	2.94119	-1.95546	0.00385	0.205336	0.687535
Post exercise	MICE	SLC66A3	0.398529	14.725	2.93766	-1.96421	0.003891	0.205336	0.687535
Post exercise	MICE	RPL19	0.339366	18.0553	2.93243	-1.97715	0.003953	0.205336	0.687535
Post exercise	MICE	STK10	0.200763	18.3586	2.93172	-1.97884	0.003961	0.205336	0.687535
Post exercise	MICE	PADI4	0.479298	16.5106	2.9316	-1.97921	0.003963	0.205336	0.687535
Post exercise	MICE	POLA1	0.365052	16.9746	2.9304	-1.98218	0.003977	0.205336	0.687535
Post exercise	MICE	MOSPD2	0.14186	15.7072	2.9274	-1.98945	0.004013	0.205336	0.687535
Post exercise	MICE	LGALS1	0.340528	18.6862	2.92672	-1.99128	0.004022	0.205336	0.687535
Post exercise	MICE	AHCY	0.14535	19.2859	2.92228	-2.00209	0.004075	0.205336	0.687535
Post exercise	MICE	CRIPT	0.50182	13.5229	2.914	-2.02263	0.004179	0.205336	0.687535
Post exercise	MICE	PLD1	0.414937	16.3467	2.90878	-2.03544	0.004245	0.205336	0.687535
Post exercise	HIIE	HBD	-0.65384	14.7482	-2.90717	-2.03941	0.004266	0.205336	0.687535
Post exercise	MICE	FAM3A	0.288084	13.5822	2.90462	-2.04559	0.004298	0.205336	0.687535
Post exercise	HIIE	PGLYRP2	-0.32431	14.8943	-2.90398	-2.04723	0.004307	0.205336	0.687535
Post exercise	MICE	SPTLC1	0.11785	16.1197	2.90018	-2.05642	0.004356	0.205336	0.687535
Post exercise	HIIE	IGKV1-8	-0.3712	13.6721	-2.89912	-2.05913	0.00437	0.205336	0.687535
Post exercise	MICE	NCF1	0.341269	16.5018	2.89566	-2.06761	0.004416	0.205336	0.687535
Post exercise	HIIE	SLC30A5	-0.29165	13.5296	-2.89466	-2.06998	0.004429	0.205336	0.687535
Post exercise	MICE	AP2A2	0.103798	18.6975	2.89364	-2.07243	0.004442	0.205336	0.687535
Post exercise	MICE	RNPEP	0.268709	17.1946	2.89147	-2.07784	0.004472	0.205336	0.687535
Post exercise	MICE	RAB3D	0.30404	15.7163	2.89124	-2.07842	0.004475	0.205336	0.687535
Post exercise	HIIE	ISLR	-0.42114	13.3351	-2.89046	-2.08032	0.004485	0.205336	0.687535
Post exercise	MICE	SERPINB8	0.316491	18.7952	2.88957	-2.08249	0.004497	0.205336	0.687535
Post exercise	HIIE	TESC	-0.31275	15.4815	-2.88731	-2.08801	0.004528	0.205336	0.687535
Post exercise	MICE	MYG1	0.253028	16.2024	2.88473	-2.09431	0.004563	0.205336	0.687535
Post exercise	MICE	RAB27A	0.156622	20.8386	2.88178	-2.10136	0.004602	0.205336	0.687535
Post exercise	MICE	METTL1	0.475877	13.763	2.88178	-2.1015	0.004603	0.205336	0.687535
Post exercise	MICE	MTFP1	0.330294	14.7394	2.87994	-2.10598	0.004629	0.205336	0.687535
Post exercise	HIIE	RELN	-0.33047	15.0463	-2.87811	-2.11042	0.004654	0.205336	0.687535
Post exercise	MICE	TIMM23	0.321863	15.5294	2.87714	-2.11279	0.004667	0.205336	0.687535
Post exercise	MICE	TUT7	0.136674	14.6578	2.87572	-2.11612	0.004686	0.205336	0.687535
Post exercise	MICE	MICALL1	0.308131	14.2047	2.8752	-2.11751	0.004694	0.205336	0.687535
Post exercise	MICE	NIPSNAP1	0.534097	16.7221	2.87293	-2.12302	0.004726	0.205336	0.687535
Post exercise	MICE	DHX57	0.330556	13.6769	2.86829	-2.13428	0.004792	0.205419	0.687359
Post exercise	MICE	SERPINB10	0.49695	16.3502	2.86712	-2.13713	0.004809	0.205419	0.687359
Post exercise	MICE	ALDH2	0.383309	18.2472	2.86562	-2.14076	0.00483	0.205419	0.687359
Post exercise	MICE	DPP8	0.232289	13.6433	2.86012	-2.15397	0.004909	0.206308	0.685484
Post exercise	MICE	LRRC25	0.49028	14.5441	2.85946	-2.15568	0.004919	0.206308	0.685484
Post exercise	MICE	TSNAX	0.29019	15.927	2.85663	-2.16253	0.004961	0.206616	0.684836
Post exercise	MICE	TLR8	0.36011	13.9401	2.8488	-2.18143	0.005077	0.210018	0.677743
Post exercise	HIIE	C1orf198	-0.44893	16.5775	-2.84247	-2.19667	0.005173	0.212333	0.672982
Post exercise	MICE	CENPC	0.367084	14.9458	2.8405	-2.20143	0.005204	0.212333	0.672982
Post exercise	MICE	STRADA	0.395739	12.2593	2.83443	-2.21602	0.005298	0.214188	0.669204
Post exercise	MICE	CYBB	0.390127	17.216	2.833	-2.21944	0.00532	0.214188	0.669204
Post exercise	MICE	UTP23	0.395227	13.5534	2.81929	-2.25229	0.005539	0.22081	0.655982
Post exercise	MICE	MPG	0.397981	14.742	2.81816	-2.25497	0.005558	0.22081	0.655982
Post exercise	MICE	HMOX1	0.338674	14.7172	2.81054	-2.27316	0.005683	0.223264	0.651181
Post exercise	MICE	TRMT61B	0.290414	12.9203	2.80804	-2.27902	0.005724	0.223264	0.651181
Post exercise	MICE	KIAA0930	0.207361	14.6228	2.80767	-2.27988	0.00573	0.223264	0.651181
Post exercise	MICE	NMRK1	0.254651	14.6107	2.79793	-2.30315	0.005897	0.227271	0.643455
Post exercise	HIIE	FURIN	-0.33636	13.4878	-2.79601	-2.30772	0.005931	0.227271	0.643455
Post exercise	MICE	NDUFA11	0.292253	15.5441	2.7951	-2.30987	0.005946	0.227271	0.643455
Post exercise	HIIE	UROS	-0.34179	12.6419	-2.79204	-2.31712	0.006	0.227869	0.642314
Post exercise	MICE	CPPED1	0.32352	17.521	2.78807	-2.32653	0.006069	0.229084	0.640006
Post exercise	MICE	FSCN1	0.232775	15.4052	2.78565	-2.33226	0.006112	0.229275	0.639644
Post exercise	MICE	NCF4	0.400737	16.01	2.7784	-2.34938	0.006243	0.23219	0.634156
Post exercise	HIIE	STUB1	-0.18311	15.642	-2.77434	-2.35884	0.006316	0.23219	0.634156
Post exercise	MICE	EIF3I	0.157313	17.3744	2.77339	-2.36107	0.006333	0.23219	0.634156
Post exercise	HIIE	DNASE1	-0.68379	12.3346	-2.77287	-2.36242	0.006344	0.23219	0.634156
Post exercise	MICE	FNTB	0.164422	15.1652	2.7667	-2.37683	0.006457	0.234191	0.630429
Post exercise	MICE	THG1L	0.410822	13.9173	2.76576	-2.37915	0.006476	0.234191	0.630429
Post exercise	MICE	ZMYND8	0.343469	13.607	2.75762	-2.39825	0.006631	0.238349	0.622787
Post exercise	MICE	SLC25A40	0.225297	15.688	2.7522	-2.41095	0.006735	0.240681	0.618557
Post exercise	HIIE	CARD16	-0.50688	12.178	-2.75006	-2.41596	0.006777	0.240749	0.618436
Post exercise	HIIE	APOA1	-0.37482	14.8624	-2.73896	-2.44186	0.006997	0.241438	0.617195
Post exercise	MICE	PPP5C	0.151147	15.425	2.73285	-2.45597	0.00712	0.241438	0.617195
Post exercise	MICE	RAB39A	0.491967	15.5345	2.72852	-2.46613	0.00721	0.241438	0.617195
Post exercise	MICE	CSNK1D	0.189571	13.3557	2.72831	-2.46653	0.007214	0.241438	0.617195
Post exercise	MICE	RBP7	0.346172	14.6889	2.72728	-2.46901	0.007236	0.241438	0.617195
Post exercise	HIIE	CISD2	-0.23132	17.59	-2.72266	-2.47973	0.007333	0.241438	0.617195
Post exercise	MICE	TSR1	0.297493	14.2476	2.72241	-2.48032	0.007338	0.241438	0.617195
Post exercise	MICE	MRPS14	0.401313	13.7533	2.72062	-2.48446	0.007376	0.241438	0.617195
Post exercise	MICE	TARDBP	0.23019	16.3657	2.71998	-2.48594	0.007389	0.241438	0.617195
Post exercise	MICE	ADD2	0.617929	13.6534	2.71876	-2.48877	0.007415	0.241438	0.617195
Post exercise	MICE	FAM78A	0.254767	14.5881	2.71761	-2.49142	0.00744	0.241438	0.617195
Post exercise	MICE	NANS	0.186006	17.1736	2.71686	-2.49309	0.007455	0.241438	0.617195
Post exercise	HIIE	MASP2	-0.36144	13.4791	-2.71417	-2.49938	0.007513	0.241438	0.617195
Post exercise	MICE	SETD3	0.192211	14.7342	2.71399	-2.49969	0.007516	0.241438	0.617195
Post exercise	MICE	GFUS	0.376493	16.4627	2.71403	-2.4997	0.007516	0.241438	0.617195
Post exercise	MICE	NDUFB9	0.386222	17.1429	2.71402	-2.49972	0.007516	0.241438	0.617195
Post exercise	MICE	CAPG	0.341994	18.6553	2.714	-2.49976	0.007517	0.241438	0.617195
Post exercise	MICE	ABCF1	0.127692	17.5625	2.71344	-2.50097	0.007528	0.241438	0.617195
Post exercise	MICE	FUCA1	0.205577	16.3278	2.71217	-2.504	0.007556	0.241438	0.617195
Post exercise	MICE	STAU1	0.252886	14.2009	2.70714	-2.51556	0.007665	0.242318	0.615614
Post exercise	MICE	USP48	0.316499	13.9038	2.70468	-2.52128	0.00772	0.242318	0.615614
Post exercise	MICE	TLR2	0.400178	15.2797	2.70287	-2.52546	0.00776	0.242318	0.615614
Post exercise	MICE	GPAA1	0.301126	15.1141	2.7014	-2.52883	0.007792	0.242318	0.615614
Post exercise	MICE	MLKL	0.171896	15.6707	2.69846	-2.53551	0.007856	0.242318	0.615614
Post exercise	MICE	LYZ	0.462261	22.4346	2.69753	-2.53773	0.007878	0.242318	0.615614
Post exercise	MICE	ACAP2	0.114243	16.224	2.69535	-2.54266	0.007926	0.242318	0.615614
Post exercise	HIIE	KIF13A	-0.24012	13.7567	-2.69458	-2.54441	0.007944	0.242318	0.615614
Post exercise	MICE	PLBD1	0.498746	16.8747	2.69458	-2.54451	0.007945	0.242318	0.615614
Post exercise	MICE	GTF2A2	0.426099	13.6944	2.69164	-2.55125	0.008012	0.24256	0.61518
Post exercise	MICE	CASP1	0.347808	16.9505	2.6904	-2.55411	0.00804	0.24256	0.61518
Post exercise	MICE	ERLIN1	0.253195	16.9437	2.68894	-2.55745	0.008073	0.24256	0.61518
Post exercise	MICE	ACTR6	0.531755	12.7149	2.68355	-2.5698	0.008198	0.242815	0.614724
Post exercise	MICE	CSTA	0.699322	14.6182	2.68123	-2.57511	0.008252	0.242815	0.614724
Post exercise	MICE	CDA	0.563762	14.4738	2.67664	-2.58559	0.00836	0.242815	0.614724
Post exercise	MICE	CD300LF	0.473428	13.8033	2.67394	-2.59176	0.008424	0.242815	0.614724
Post exercise	MICE	EPRS1	0.168752	17.488	2.67379	-2.59199	0.008426	0.242815	0.614724
Post exercise	MICE	THEM4	0.311043	15.0304	2.67378	-2.59211	0.008428	0.242815	0.614724
Post exercise	MICE	EIF2S3	0.135898	18.1691	2.67289	-2.59406	0.008448	0.242815	0.614724
Post exercise	MICE	PGGT1B	0.295678	15.4953	2.67232	-2.59545	0.008463	0.242815	0.614724
Post exercise	HIIE	MARF1	-0.39328	17.7575	-2.67171	-2.59683	0.008477	0.242815	0.614724
Post exercise	MICE	FKBP4	0.22639	15.8884	2.67143	-2.59746	0.008484	0.242815	0.614724
Post exercise	MICE	SIGLEC7	0.472859	13.3709	2.66864	-2.60382	0.008551	0.24311	0.614198
Post exercise	HIIE	C1S	-0.25955	15.0639	-2.66637	-2.60901	0.008606	0.24311	0.614198
Post exercise	HIIE	PLXNB3	-0.2467	15.8409	-2.66558	-2.6108	0.008625	0.24311	0.614198
Post exercise	MICE	KCTD12	0.335443	17.2994	2.66436	-2.61358	0.008655	0.24311	0.614198
Post exercise	MICE	HNRNPH2	0.475102	16.5409	2.66224	-2.61838	0.008707	0.24314	0.614144
Post exercise	MICE	SORD	0.133658	17.0947	2.65996	-2.62347	0.008762	0.24314	0.614144
Post exercise	MICE	SMC4	0.270709	13.9813	2.65881	-2.62618	0.008792	0.24314	0.614144
Post exercise	HIIE	GC	-0.30183	16.4069	-2.65152	-2.6427	0.008974	0.24314	0.614144
Post exercise	MICE	CISD1	0.398942	15.5843	2.64922	-2.6479	0.009032	0.24314	0.614144
Post exercise	MICE	ARID3A	0.407393	12.3503	2.64564	-2.65599	0.009123	0.24314	0.614144
Post exercise	MICE	FCN1	0.394332	17.3117	2.64507	-2.65727	0.009138	0.24314	0.614144
Post exercise	HIIE	PDZD8	-0.15899	15.549	-2.64335	-2.66107	0.009181	0.24314	0.614144
Post exercise	HIIE	STX16	-0.31581	14.5466	-2.64193	-2.66436	0.009219	0.24314	0.614144
Post exercise	HIIE	SCARF1	-0.42629	15.1904	-2.64042	-2.66778	0.009258	0.24314	0.614144
Post exercise	MICE	SEC23B	0.25559	15.313	2.64021	-2.66826	0.009263	0.24314	0.614144
Post exercise	MICE	LTA4H	0.247458	19.2354	2.63902	-2.67094	0.009294	0.24314	0.614144
Post exercise	HIIE	VRK2	-0.39022	12.3822	-2.63895	-2.6711	0.009296	0.24314	0.614144
Post exercise	MICE	SPTLC2	0.136103	15.0468	2.63276	-2.68495	0.009457	0.24314	0.614144
Post exercise	MICE	DENR	0.162334	16.8495	2.63207	-2.68649	0.009475	0.24314	0.614144
Post exercise	HIIE	PIP5K1A	-0.17718	15.964	-2.63082	-2.68932	0.009509	0.24314	0.614144
Post exercise	HIIE	USP22	-0.31963	12.2509	-2.62832	-2.69498	0.009576	0.24314	0.614144
Post exercise	MICE	KBTBD11	0.385626	14.2102	2.62821	-2.69526	0.00958	0.24314	0.614144
Post exercise	HIIE	CFHR5	-0.72166	13.6821	-2.62762	-2.69658	0.009595	0.24314	0.614144
Post exercise	HIIE	ABHD5	-0.31677	14.7053	-2.62761	-2.69662	0.009596	0.24314	0.614144
Post exercise	MICE	BPNT1	0.127947	16.6001	2.62309	-2.70668	0.009716	0.24314	0.614144
Post exercise	MICE	SNX27	0.204058	16.1941	2.62258	-2.70789	0.009731	0.24314	0.614144
Post exercise	MICE	PA2G4	0.159203	19.573	2.62193	-2.70926	0.009747	0.24314	0.614144
Post exercise	MICE	PGD	0.130834	21.3305	2.62	-2.71359	0.0098	0.24314	0.614144
Post exercise	MICE	PRSS57	0.526388	13.3618	2.61996	-2.71376	0.009803	0.24314	0.614144
Post exercise	MICE	AIMP2	0.201566	15.7337	2.61973	-2.71424	0.009808	0.24314	0.614144
Post exercise	MICE	MCM5	0.331281	15.4115	2.6192	-2.71547	0.009823	0.24314	0.614144
Post exercise	MICE	GCLC	0.180816	15.4744	2.61766	-2.71882	0.009864	0.24314	0.614144
Post exercise	MICE	SMC2	0.251044	13.9861	2.61625	-2.72204	0.009904	0.24314	0.614144
Post exercise	MICE	UBFD1	0.391443	14.9304	2.61516	-2.7245	0.009935	0.24314	0.614144
Post exercise	MICE	C1D	0.375006	11.5112	2.61508	-2.7247	0.009937	0.24314	0.614144
Post exercise	MICE	RPS19	0.261195	18.5272	2.6148	-2.72531	0.009945	0.24314	0.614144
Post exercise	MICE	PAFAH1B1	0.135399	18.357	2.6082	-2.73996	0.010127	0.245623	0.609732
Post exercise	HIIE	ZNF316	-0.38928	11.7127	-2.60689	-2.74297	0.010166	0.245623	0.609732
Post exercise	MICE	CTR9	0.29545	15.7845	2.60472	-2.7478	0.010227	0.245623	0.609732
Post exercise	MICE	ALDH3B1	0.354489	15.388	2.60141	-2.75519	0.010322	0.245623	0.609732
Post exercise	MICE	CELF1	0.241003	16.0463	2.59957	-2.75928	0.010374	0.245623	0.609732
Post exercise	HIIE	NBEA	-0.38692	13.215	-2.5995	-2.75942	0.010376	0.245623	0.609732
Post exercise	HIIE	ECM1	-0.35831	17.4615	-2.59803	-2.76271	0.010419	0.245623	0.609732
Post exercise	MICE	LGALS9	0.424626	15.1454	2.59779	-2.76324	0.010426	0.245623	0.609732
Post exercise	MICE	PARP14	0.197745	14.7677	2.59775	-2.76324	0.010425	0.245623	0.609732
Post exercise	HIIE	MMRN1	-0.34306	22.4429	-2.59685	-2.76533	0.010453	0.245623	0.609732
Post exercise	MICE	CIAO1	0.227584	14.6211	2.58231	-2.79753	0.010881	0.253969	0.595219
Post exercise	HIIE	EXD2	-0.27323	12.0935	-2.5819	-2.79838	0.010892	0.253969	0.595219
Post exercise	MICE	CDK7	0.462219	13.7299	2.57911	-2.80463	0.010978	0.25413	0.594944
Post exercise	MICE	G3BP1	0.169706	15.9233	2.57888	-2.80506	0.010983	0.25413	0.594944
Post exercise	MICE	TOR1B	0.195456	13.9108	2.57551	-2.81249	0.011086	0.25552	0.592575
Post exercise	MICE	TFAM	0.178625	18.1757	2.57019	-2.82425	0.01125	0.257849	0.588635
Post exercise	HIIE	CD72	-0.37803	11.9713	-2.56904	-2.82683	0.011286	0.257849	0.588635
Post exercise	MICE	MGST1	0.430553	16.1247	2.56719	-2.83088	0.011344	0.257849	0.588635
Post exercise	MICE	RBBP7	0.293772	17.0936	2.56594	-2.83363	0.011383	0.257849	0.588635
Post exercise	MICE	TALDO1	0.149618	20.7823	2.56533	-2.8349	0.0114	0.257849	0.588635
Post exercise	HIIE	CD46	-0.22241	17.6179	-2.5584	-2.85019	0.011621	0.257971	0.588428
Post exercise	MICE	MEFV	0.331854	13.9304	2.55524	-2.85711	0.011722	0.257971	0.588428
Post exercise	MICE	EIF2S1	0.097866	19.0271	2.55461	-2.85842	0.01174	0.257971	0.588428
Post exercise	HIIE	SLC40A1	-0.29359	13.5449	-2.55401	-2.85981	0.011761	0.257971	0.588428
Post exercise	MICE	CTSZ	0.333395	17.616	2.55247	-2.86318	0.011811	0.257971	0.588428
Post exercise	MICE	XRN1	0.125967	15.7071	2.5508	-2.86675	0.011863	0.257971	0.588428
Post exercise	MICE	ATP5F1E	0.195323	17.7762	2.55054	-2.8674	0.011873	0.257971	0.588428
Post exercise	MICE	FBP1	0.40906	16.8217	2.54935	-2.87001	0.011912	0.257971	0.588428
Post exercise	HIIE	MFSD2B	-0.22078	15.6037	-2.54909	-2.87057	0.01192	0.257971	0.588428
Post exercise	HIIE	MRPL32	-0.26547	13.3817	-2.54828	-2.87231	0.011946	0.257971	0.588428
Post exercise	MICE	PDPR	0.176271	16.416	2.54731	-2.8744	0.011977	0.257971	0.588428
Post exercise	HIIE	CHST2	-0.27917	12.3212	-2.54659	-2.87595	0.012	0.257971	0.588428
Post exercise	HIIE	TUBGCP4	-0.23289	13.9873	-2.54464	-2.88023	0.012065	0.257971	0.588428
Post exercise	HIIE	RAPGEF2	-0.23751	15.0062	-2.54463	-2.88032	0.012067	0.257971	0.588428
Post exercise	HIIE	VAPB	-0.30441	16.5368	-2.54462	-2.88033	0.012067	0.257971	0.588428
Post exercise	MICE	FKBP3	0.124799	18.1279	2.5439	-2.88184	0.012089	0.257971	0.588428
Post exercise	MICE	GALE	0.351431	14.4166	2.54081	-2.88864	0.012193	0.259269	0.586249
Post exercise	MICE	MRPS18A	0.220137	14.9134	2.53784	-2.8951	0.012292	0.259392	0.586043
Post exercise	MICE	AIF1	0.524963	14.4945	2.53582	-2.8995	0.01236	0.259392	0.586043
Post exercise	HIIE	TUBB8	-0.45463	16.3039	-2.53427	-2.90289	0.012412	0.259392	0.586043
Post exercise	HIIE	TOM1L2	-0.29117	16.3354	-2.53264	-2.90643	0.012467	0.259392	0.586043
Post exercise	HIIE	WASF1	-0.34822	12.8624	-2.53252	-2.90669	0.012471	0.259392	0.586043
Post exercise	MICE	HNRNPUL2	0.293516	17.8443	2.53198	-2.90786	0.01249	0.259392	0.586043
Post exercise	MICE	EIF2A	0.110951	16.7005	2.52991	-2.91228	0.012558	0.259392	0.586043
Post exercise	HIIE	LMBRD2	-0.53652	13.8503	-2.5295	-2.91325	0.012574	0.259392	0.586043
Post exercise	MICE	RTCB	0.167467	17.6212	2.52913	-2.91397	0.012585	0.259392	0.586043
Post exercise	MICE	ALYREF	0.26149	17.4046	2.52341	-2.92645	0.012784	0.262118	0.581503
Post exercise	MICE	MAPK1	0.102797	18.8539	2.52161	-2.93028	0.012845	0.262118	0.581503
Post exercise	HIIE	IRAK1	-0.42027	11.7332	-2.51986	-2.93412	0.012907	0.262118	0.581503
Post exercise	MICE	PADI2	0.384891	14.8677	2.519	-2.93599	0.012938	0.262118	0.581503
Post exercise	MICE	PLD4	0.447679	14.7551	2.51876	-2.93651	0.012946	0.262118	0.581503
Post exercise	HIIE	SVEP1	-0.33516	14.1803	-2.51785	-2.93847	0.012978	0.262118	0.581503
Post exercise	MICE	TXLNG	0.447821	13.3472	2.5156	-2.94334	0.013057	0.262722	0.580504
Post exercise	HIIE	LAMC1	-0.28043	15.9716	-2.51454	-2.94563	0.013095	0.262722	0.580504
Post exercise	MICE	USP8	0.169146	13.0786	2.51162	-2.95186	0.013197	0.263893	0.578571
Post exercise	MICE	ISOC2	0.327517	15.7794	2.509	-2.95757	0.013292	0.2639	0.578561
Post exercise	MICE	SLC22A18	0.195959	15.8095	2.50863	-2.95836	0.013305	0.2639	0.578561
Post exercise	MICE	WDR46	0.412893	12.7068	2.508	-2.95972	0.013328	0.2639	0.578561
Post exercise	MICE	BROX	0.113558	17.6271	2.50393	-2.96841	0.013474	0.265907	0.57527
Post exercise	HIIE	SRGN	-0.39086	19.676	-2.50146	-2.9738	0.013566	0.266849	0.573734
Post exercise	HIIE	TMUB1	-0.38479	15.2824	-2.49859	-2.97996	0.013671	0.26803	0.571816
Post exercise	MICE	CKAP4	0.312975	15.8305	2.49741	-2.98249	0.013714	0.26803	0.571816
Post exercise	HIIE	PPP6R2	-0.34135	14.0213	-2.49055	-2.99718	0.01397	0.271229	0.566663
Post exercise	MICE	HDAC2	0.309858	17.3368	2.48996	-2.99846	0.013992	0.271229	0.566663
Post exercise	MICE	CAPN2	0.201586	18.4793	2.48941	-2.99964	0.014013	0.271229	0.566663
Post exercise	MICE	INTS9	0.334833	12.6341	2.4853	-3.00841	0.014168	0.273359	0.563267
Post exercise	MICE	ELMO1	0.12542	18.5428	2.48085	-3.01784	0.014336	0.275439	0.559975
Post exercise	HIIE	CROT	-0.31679	13.1571	-2.4801	-3.01952	0.014367	0.275439	0.559975
Post exercise	HIIE	PPBP	-0.347	27.1919	-2.47832	-3.02331	0.014436	0.275878	0.559282
Post exercise	MICE	GTF2B	0.504555	14.21	2.47132	-3.0382	0.014709	0.278783	0.554733
Post exercise	MICE	PABPC1	0.181336	18.9669	2.47023	-3.04052	0.014752	0.278783	0.554733
Post exercise	MICE	SQOR	0.141168	18.9746	2.46925	-3.04253	0.014788	0.278783	0.554733
Post exercise	MICE	ITCH	0.109006	14.7623	2.46761	-3.04602	0.014853	0.278783	0.554733
Post exercise	MICE	LARP1	0.146644	15.0985	2.46751	-3.04623	0.014857	0.278783	0.554733
Post exercise	HIIE	SLC2A3	-0.23513	22.9551	-2.46737	-3.0466	0.014865	0.278783	0.554733
Post exercise	HIIE	SENP3	-0.30853	11.8935	-2.46612	-3.04921	0.014913	0.278829	0.554662
Post exercise	MICE	GTF3C2	0.41907	13.0535	2.46219	-3.05758	0.015072	0.279727	0.553265
Post exercise	MICE	OSBPL9	0.188872	14.4155	2.45936	-3.06351	0.015184	0.279727	0.553265
Post exercise	MICE	NECAP2	0.16186	16.8042	2.45878	-3.06472	0.015207	0.279727	0.553265
Post exercise	HIIE	QPCT	-0.62344	14.0275	-2.45664	-3.06931	0.015296	0.279727	0.553265
Post exercise	HIIE	JPT1	-0.38118	13.9401	-2.45593	-3.07081	0.015325	0.279727	0.553265
Post exercise	MICE	ATXN2	0.350079	13.1347	2.45522	-3.07231	0.015354	0.279727	0.553265
Post exercise	MICE	AMT	0.202686	14.3007	2.45337	-3.07616	0.015428	0.279727	0.553265
Post exercise	MICE	WDR48	0.174472	14.4984	2.45326	-3.0764	0.015432	0.279727	0.553265
Post exercise	HIIE	TAGLN3	-0.59954	15.8685	-2.4532	-3.07658	0.015436	0.279727	0.553265
Post exercise	HIIE	SNX30	-0.24442	14.6271	-2.4495	-3.08439	0.015589	0.279727	0.553265
Post exercise	MICE	EIF3B	0.156691	18.0563	2.44907	-3.08523	0.015605	0.279727	0.553265
Post exercise	MICE	RXRB	0.428132	11.986	2.44698	-3.08971	0.015694	0.279727	0.553265
Post exercise	MICE	ADCY7	0.329564	12.6455	2.44529	-3.09325	0.015764	0.279727	0.553265
Post exercise	MICE	DYNLT1	0.324428	13.1962	2.44357	-3.09688	0.015836	0.279727	0.553265
Post exercise	MICE	MRPS21	0.439408	14.7116	2.44276	-3.09859	0.01587	0.279727	0.553265
Post exercise	MICE	ABCF2	0.244832	14.9366	2.44182	-3.10056	0.01591	0.279727	0.553265
Post exercise	MICE	VPS29	0.113292	18.1281	2.44168	-3.1008	0.015914	0.279727	0.553265
Post exercise	MICE	TECPR1	0.178366	14.3512	2.44154	-3.10109	0.01592	0.279727	0.553265
Post exercise	MICE	NDUFB10	0.252389	18.9093	2.44114	-3.10198	0.015938	0.279727	0.553265
Post exercise	MICE	NMT1	0.124531	16.2887	2.43891	-3.10662	0.016031	0.279727	0.553265
Post exercise	MICE	TADA2B	0.43456	14.8975	2.43891	-3.10668	0.016033	0.279727	0.553265
Post exercise	MICE	PPP2CA	0.178043	17.5027	2.43741	-3.10981	0.016096	0.279727	0.553265
Post exercise	HIIE	ACSBG1	-0.33633	13.9894	-2.43496	-3.11497	0.016201	0.279727	0.553265
Post exercise	HIIE	TTC7B	-0.23338	16.3144	-2.43491	-3.11506	0.016203	0.279727	0.553265
Post exercise	MICE	TMEM14C	0.471341	14.7123	2.43406	-3.11685	0.01624	0.279727	0.553265
Post exercise	HIIE	HECA	-0.33534	13.5433	-2.43371	-3.11758	0.016255	0.279727	0.553265
Post exercise	MICE	PTPN2	0.275696	14.3187	2.43295	-3.11917	0.016287	0.279727	0.553265
Post exercise	MICE	ZC3HAV1	0.12536	16.5762	2.4328	-3.11944	0.016292	0.279727	0.553265
Post exercise	MICE	PPA1	0.178123	16.9792	2.43253	-3.12002	0.016305	0.279727	0.553265
Post exercise	MICE	EPM2AIP1	0.298267	13.4975	2.4301	-3.12516	0.016411	0.280203	0.552527
Post exercise	MICE	TRAPPC2L	0.156808	15.8162	2.42972	-3.12588	0.016425	0.280203	0.552527
Post exercise	MICE	CSNK1A1	0.193605	15.6125	2.42774	-3.13008	0.016513	0.280907	0.551438
Post exercise	HIIE	AGT	-0.30003	15.4677	-2.41029	-3.16645	0.017289	0.288005	0.5406
Post exercise	MICE	GLIPR2	0.299272	18.2595	2.41013	-3.16679	0.017296	0.288005	0.5406
Post exercise	MICE	ADSS2	0.171161	16.7659	2.40876	-3.16961	0.017358	0.288005	0.5406
Post exercise	MICE	SEL1L	0.11116	15.4105	2.40737	-3.17246	0.01742	0.288005	0.5406
Post exercise	HIIE	MFSD6	-0.37998	13.955	-2.40568	-3.17603	0.0175	0.288005	0.5406
Post exercise	MICE	H1-0	0.434573	17.4683	2.40486	-3.17772	0.017537	0.288005	0.5406
Post exercise	MICE	NAA25	0.134342	15.2039	2.40476	-3.17788	0.01754	0.288005	0.5406
Post exercise	MICE	UPF1	0.130201	17.2422	2.40446	-3.1785	0.017554	0.288005	0.5406
Post exercise	MICE	UBE2I	0.268543	18.148	2.40335	-3.18086	0.017607	0.288005	0.5406
Post exercise	MICE	P2RX4	0.398237	13.8114	2.40277	-3.18205	0.017633	0.288005	0.5406
Post exercise	MICE	FAM76B	0.471538	13.4979	2.40119	-3.18534	0.017707	0.288005	0.5406
Post exercise	HIIE	FERRY3	-0.293	11.7834	-2.40015	-3.18744	0.017753	0.288005	0.5406
Post exercise	MICE	ALG6	0.327972	14.1907	2.39988	-3.18805	0.017768	0.288005	0.5406
Post exercise	MICE	GSTZ1	0.216462	15.6363	2.39883	-3.19021	0.017816	0.288005	0.5406
Post exercise	MICE	TKT	0.256827	21.0003	2.39849	-3.19093	0.017832	0.288005	0.5406
Post exercise	MICE	SMYD5	0.253836	14.0663	2.39655	-3.19493	0.017923	0.288005	0.5406
Post exercise	HIIE	MICALL2	-0.33295	13.8674	-2.39527	-3.19758	0.017983	0.288005	0.5406
Post exercise	MICE	HMGB2	0.326574	20.0326	2.39526	-3.1976	0.017983	0.288005	0.5406
Post exercise	MICE	SNX20	0.324867	13.242	2.39516	-3.19779	0.017988	0.288005	0.5406
Post exercise	MICE	GIMAP2	0.269758	15.2006	2.39497	-3.1982	0.017997	0.288005	0.5406
Post exercise	MICE	SON	0.363058	13.6741	2.39495	-3.19823	0.017998	0.288005	0.5406
Post exercise	MICE	GUSB	0.247	17.6382	2.39362	-3.20099	0.018061	0.288005	0.5406
Post exercise	MICE	MPO	0.4148	21.8933	2.39354	-3.20114	0.018064	0.288005	0.5406
Post exercise	MICE	IMPACT	0.31044	12.7744	2.39208	-3.20415	0.018133	0.288005	0.5406
Post exercise	MICE	AKR1A1	0.1247	18.553	2.39042	-3.20753	0.01821	0.288005	0.5406
Post exercise	MICE	FKBP8	0.125269	15.5635	2.39037	-3.20764	0.018213	0.288005	0.5406
Post exercise	MICE	GNB4	0.473467	17.2192	2.39007	-3.20831	0.018229	0.288005	0.5406
Post exercise	HIIE	TUT4	-0.63974	13.4828	-2.3893	-3.2099	0.018266	0.288005	0.5406
Post exercise	HIIE	WDR47	-0.27262	12.0159	-2.38224	-3.22438	0.018603	0.290484	0.536878
Post exercise	MICE	CREG1	0.668013	14.6793	2.38218	-3.22455	0.018607	0.290484	0.536878
Post exercise	HIIE	CCDC97	-0.26295	12.1093	-2.3818	-3.22528	0.018624	0.290484	0.536878
Post exercise	HIIE	ORAI1	-0.52295	13.8493	-2.38127	-3.22641	0.018651	0.290484	0.536878
Post exercise	HIIE	SLC8A3	-0.54131	13.8705	-2.3804	-3.2282	0.018694	0.290484	0.536878
Post exercise	HIIE	FAM174A	-0.34986	15.1938	-2.37945	-3.23017	0.01874	0.290484	0.536878
Post exercise	HIIE	LANCL3	-0.259	13.5249	-2.37905	-3.23098	0.01876	0.290484	0.536878
Post exercise	MICE	NSUN2	0.251248	15.0328	2.37715	-3.23489	0.018853	0.29118	0.535838
Post exercise	MICE	PELO	0.128357	12.8841	2.37543	-3.23835	0.018935	0.291701	0.535062
Post exercise	MICE	TOR1A	0.135082	15.5578	2.3743	-3.24067	0.018991	0.291816	0.534891
Post exercise	MICE	ACSL1	0.126946	17.6996	2.37308	-3.24317	0.019051	0.291999	0.534619
Post exercise	MICE	STX5	0.118512	15.3861	2.37073	-3.24798	0.019167	0.293038	0.533075
Post exercise	MICE	ARFGAP1	0.234545	14.7395	2.36513	-3.25947	0.019449	0.296066	0.528611
Post exercise	MICE	HSD17B11	0.132701	16.7856	2.36482	-3.26007	0.019463	0.296066	0.528611
Post exercise	MICE	METAP2	0.144685	14.7119	2.36206	-3.2657	0.019603	0.297439	0.526601
Post exercise	HIIE	PRTFDC1	-0.19969	14.3859	-2.35941	-3.27111	0.019738	0.298332	0.5253
Post exercise	HIIE	ARG2	-0.2723	14.4435	-2.359	-3.27198	0.01976	0.298332	0.5253
Post exercise	HIIE	RELCH	-0.26238	13.3462	-2.35755	-3.27495	0.019835	0.29871	0.52475
Post exercise	MICE	RRAGD	0.135255	16.201	2.35254	-3.28509	0.020091	0.299325	0.523857
Post exercise	MICE	COTL1	0.117884	21.5734	2.3523	-3.28556	0.020103	0.299325	0.523857
Post exercise	MICE	RTF2	0.341193	13.929	2.35173	-3.28678	0.020135	0.299325	0.523857
Post exercise	HIIE	LPL	-0.42193	19.9014	-2.3499	-3.2905	0.02023	0.299325	0.523857
Post exercise	HIIE	BCL2L1	-0.24982	16.7638	-2.34981	-3.29067	0.020235	0.299325	0.523857
Post exercise	MICE	NELFE	0.354287	13.8278	2.34904	-3.29225	0.020275	0.299325	0.523857
Post exercise	MICE	AIMP1	0.0867	16.4608	2.34863	-3.29302	0.020294	0.299325	0.523857
Post exercise	MICE	ARHGDIB	0.126488	21.8515	2.34816	-3.29397	0.020319	0.299325	0.523857
Post exercise	MICE	EZR	0.286242	18.3404	2.34815	-3.29405	0.020322	0.299325	0.523857
Post exercise	MICE	RPL17	0.274252	19.0315	2.34693	-3.29653	0.020386	0.299538	0.523548
Post exercise	MICE	CTSD	0.185383	20.3298	2.34372	-3.30302	0.020555	0.301285	0.521022
Post exercise	MICE	CD4	0.384872	15.2388	2.34109	-3.30835	0.020694	0.302591	0.519144
Post exercise	MICE	RCC1	0.267919	17.0282	2.34016	-3.31024	0.020744	0.302591	0.519144
Post exercise	MICE	SRP14	0.302868	17.5899	2.3369	-3.31681	0.020918	0.303062	0.518468
Post exercise	HIIE	APP	-0.31361	18.9413	-2.33592	-3.31881	0.020971	0.303062	0.518468
Post exercise	HIIE	RMDN3	-0.15955	15.9361	-2.33483	-3.32096	0.021028	0.303062	0.518468
Post exercise	HIIE	MIB1	-0.26508	12.7161	-2.33463	-3.32139	0.02104	0.303062	0.518468
Post exercise	HIIE	GMEB1	-0.4066	13.5994	-2.33426	-3.32215	0.02106	0.303062	0.518468
Post exercise	MICE	MYO1F	0.220038	17.6564	2.33332	-3.32404	0.021111	0.303062	0.518468
Post exercise	MICE	SMC5	0.343236	17.8187	2.33236	-3.32599	0.021163	0.303062	0.518468
Post exercise	MICE	CD302	0.331304	12.7178	2.3308	-3.32912	0.021248	0.303062	0.518468
Post exercise	HIIE	PECAM1	-0.19585	20.3928	-2.3303	-3.33013	0.021275	0.303062	0.518468
Post exercise	HIIE	SPIRE1	-0.25089	12.6297	-2.32993	-3.33084	0.021294	0.303062	0.518468
Post exercise	HIIE	DSE	-0.54832	11.7687	-2.32694	-3.33691	0.021459	0.303062	0.518468
Post exercise	MICE	APOBEC3B	0.34265	13.6549	2.32508	-3.34063	0.021561	0.303062	0.518468
Post exercise	MICE	SH2D1B	0.396729	13.3667	2.325	-3.34081	0.021566	0.303062	0.518468
Post exercise	MICE	PSD4	0.174744	14.7747	2.32346	-3.34386	0.021649	0.303062	0.518468
Post exercise	MICE	ACAD9	0.082953	16.4845	2.32077	-3.34926	0.021799	0.303062	0.518468
Post exercise	MICE	IGHV3-9	0.384155	14.7867	2.32078	-3.34927	0.0218	0.303062	0.518468
Post exercise	MICE	DOCK2	0.208784	17.1977	2.31972	-3.35141	0.021859	0.303062	0.518468
Post exercise	MICE	RPS29	0.391896	16.7041	2.31943	-3.35199	0.021875	0.303062	0.518468
Post exercise	MICE	PISD	0.313921	12.6445	2.31923	-3.35239	0.021886	0.303062	0.518468
Post exercise	HIIE	MICAL3	-0.20981	14.1934	-2.31902	-3.35279	0.021897	0.303062	0.518468
Post exercise	MICE	VPS26A	0.241958	16.6944	2.31846	-3.35394	0.02193	0.303062	0.518468
Post exercise	HIIE	NECTIN2	-0.29868	16.1508	-2.31839	-3.35408	0.021933	0.303062	0.518468
Post exercise	MICE	SEC22A	0.325103	14.7962	2.31799	-3.35487	0.021956	0.303062	0.518468
Post exercise	MICE	PXK	0.205564	14.2665	2.31728	-3.35627	0.021994	0.303062	0.518468
Post exercise	MICE	NAIP	0.253142	13.5734	2.31575	-3.35938	0.022082	0.303062	0.518468
Post exercise	MICE	NRM	0.315415	15.7338	2.31515	-3.36057	0.022116	0.303062	0.518468
Post exercise	MICE	HEATR3	0.318051	13.5603	2.31487	-3.36113	0.022131	0.303062	0.518468
Post exercise	HIIE	ITM2B	-0.29472	14.5859	-2.31287	-3.36512	0.022244	0.303385	0.518007
Post exercise	MICE	NAGK	0.267347	18.8226	2.31213	-3.36661	0.022286	0.303385	0.518007
Post exercise	MICE	SPPL2A	0.397476	15.5547	2.3118	-3.36728	0.022305	0.303385	0.518007
Post exercise	MICE	ZNF414	0.254944	10.2292	2.30845	-3.37392	0.022494	0.303999	0.517127
Post exercise	MICE	AP1G2	0.114625	16.1462	2.30836	-3.37411	0.022499	0.303999	0.517127
Post exercise	MICE	RBM26	0.264013	14.1399	2.30836	-3.37416	0.022502	0.303999	0.517127
Post exercise	MICE	MPEG1	0.345629	14.5709	2.30524	-3.38038	0.022681	0.305691	0.514717
Post exercise	MICE	ZMYM2	0.344614	12.4017	2.30442	-3.38201	0.022728	0.305691	0.514717
[truncated: 11,629 more rows]
